# Supplementary material for: Effects of an urban sanitation intervention on childhood enteric infection and diarrhea in Maputo, Mozambique: A controlled before-and-after trial
Source: eLife. 2021 Apr 9;10:e62278. doi: 10.7554/eLife.62278 (PMC8121544; doi:10.7554/eLife.62278)
Supplement: Figure 1—source data 1. [file elife-62278-fig1-data1.xlsx]

## Sheet: Sheet1
totchildID	totHHid	compID	studyArm_binary	phase_ml_analysis	phase_m24_analysis	inBL	inML	inM24	bornIn	movedIn	gpp_aden	Kkany
33326548	73742773	81841384	1	1		0	1	1	1	0	0
33326548	73742773	81841384	1		1	0	1	1	1	0	0
24145351	58588734	81841384	1		1	0	0	1	0	1	0
44523443	43546741	81841384	1	1		0	1	0	0	1	0	0
88322384	61565211	81841384	1	0	0	1	0	1			0	1
88322384	61565211	81841384	1		1	1	0	1	0	0	0	1
46633717	61565211	81841384	1	0	0	1	0	1			1	0
46633717	61565211	81841384	1		1	1	0	1	0	0	0	1
84363633	76716757	81841384	1	0	0	1	1	1
84363633	76716757	81841384	1	1		1	1	1	0	0	0	0
84363633	76716757	81841384	1		1	1	1	1	0	0	0
31164748	76716757	81841384	1	1		0	1	1	1	0	0	0
31164748	76716757	81841384	1		1	0	1	1	1	0	0
56557476	41531222	81841384	1	0	0	1	1	1			0	0
56557476	41531222	81841384	1	1		1	1	1	0	0	0	1
56557476	41531222	81841384	1		1	1	1	1	0	0	0	0
11168313	81528276	81841384	1		1	0	0	1	1	0	0	0
68567177	24687352	81841384	1	0	0	1	1	1			0	0
68567177	24687352	81841384	1	1		1	1	1	0	0	0	0
68567177	24687352	81841384	1		1	1	1	1	0	0	0	1
85511463	61132326	81841384	1	0	0	1	1	0			0	0
85511463	61132326	81841384	1	1		1	1	0	0	0	0	1
87621387	87355871	81841384	1		1	0	0	1	0	1	0	1
33357474	67826874	81841384	1		1	0	0	1	1	0	0	0
41663582	42712142	81841384	1	1		0	1	1	0	1	0
41663582	42712142	81841384	1		1	0	1	1	0	1	0	1
77518421	61888542	81841384	1		1	0	0	1	0	1	0	1
67173461	35844852	36868786	1		1	0	0	1	1	0	0
27167784	22288374	36868786	1	0	0	1	1	1			0	0
27167784	22288374	36868786	1	1		1	1	1	0	0	0	0
27167784	22288374	36868786	1		1	1	1	1	0	0	0	0
32257854	22288374	36868786	1	0	0	1	1	1			0	0
32257854	22288374	36868786	1	1		1	1	1	0	0	0	0
32257854	22288374	36868786	1		1	1	1	1	0	0	0	1
41384172	78484155	36868786	1		1	0	0	1	0	1
31327566	78484155	36868786	1		1	0	0	1	0	0	0	0
15365338	58856432	36868786	1	0	0	1	0	1			0	0
15365338	58856432	36868786	1		1	1	0	1	0	0	0	0
18372434	14814488	36868786	1	0	0	1	1	1			0	0
18372434	14814488	36868786	1	1		1	1	1	0	0	0	0
18372434	14814488	36868786	1		1	1	1	1	0	0	0	1
16561733	14814488	36868786	1	1		0	1	1	1	0	0	0
16561733	14814488	36868786	1		1	0	1	1	1	0	0	0
13738564	28136575	36868786	1	1		0	1	0	1	0	0	0
83564421	38525124	36868786	1	1		0	1	0	0	0	0	0
64242756	41741457	66167844	1	0	0	1	1	0			0	0
64242756	41741457	66167844	1	1		1	1	0	0	0
36282336	38685148	66167844	1	0	0	1	1	1			0	0
36282336	38685148	66167844	1	1		1	1	1	0	0	0	1
36282336	38685148	66167844	1		1	1	1	1	0	0	0	0
35651651	38685148	66167844	1	0	0	1	1	1			0	0
35651651	38685148	66167844	1	1		1	1	1	0	0	0	0
35651651	38685148	66167844	1		1	1	1	1	0	0	0	0
18178217	86323712	66167844	1	0	0	1	1	1			0	1
18178217	86323712	66167844	1	1		1	1	1	0	0	0	0
18178217	86323712	66167844	1		1	1	1	1	0	0
62466731	64671853	66167844	1		1	0	0	1	1	0	0	0
87127327	65826532	66167844	1	1		0	1	0	1	0
64255333	33577656	66167844	1	0	0	1	1	1			0	1
64255333	33577656	66167844	1	1		1	1	1	0	0	0	1
64255333	33577656	66167844	1		1	1	1	1	0	0	0	1
35577744	51865436	66167844	1	0	0	1	0	0			0	0
33651761	34268432	66167844	1	0	0	1	1	1
33651761	34268432	66167844	1	1		1	1	1	0	0	0	0
33651761	34268432	66167844	1		1	1	1	1	0	0
32835281	76316124	66167844	1	0	0	1	1	1
32835281	76316124	66167844	1	1		1	1	1	0	0
32835281	76316124	66167844	1		1	1	1	1	0	0	0	1
28148286	51636453	77873583	1	0	0	1	1	1
28148286	51636453	77873583	1	1		1	1	1	0	0	0	1
28148286	51636453	77873583	1		1	1	1	1	0	0	0
84322757	52343652	77873583	1		1	0	0	1	1	0	0	0
63577142	24447728	77873583	1	0	0	1	1	1			1	0
63577142	24447728	77873583	1	1		1	1	1	0	0	0	1
63577142	24447728	77873583	1		1	1	1	1	0	0	0	1
84545231	24447728	77873583	1	0	0	1	1	1
84545231	24447728	77873583	1	1		1	1	1	0	0	0	1
84545231	24447728	77873583	1		1	1	1	1	0	0	0	1
56817468	52582421	77873583	1	0	0	1	1	1
56817468	52582421	77873583	1	1		1	1	1	0	0	0	1
56817468	52582421	77873583	1		1	1	1	1	0	0	0	1
16617643	58687778	33378518	1	0	0	1	0	0			1	1
68132383	58687778	33378518	1	0	0	1	0	0			0	0
42626525	77325736	33378518	1		1	0	0	1	1	0	0	0
16553576	15521483	33378518	1	0	0	1	1	0			0	0
16553576	15521483	33378518	1	1		1	1	0	0	0	0	1
63172654	76153651	33378518	1	1		0	1	0	1	0	0	0
66767115	86855623	33378518	1	1		0	1	1	1	0	0	0
66767115	86855623	33378518	1		1	0	1	1	1	0	0
82228516	74438527	33378518	1	0	0	1	1	1			0	0
82228516	74438527	33378518	1	1		1	1	1	0	0	0	1
82228516	74438527	33378518	1		1	1	1	1	0	0	0	1
56153565	74438527	33378518	1	0	0	1	1	1
56153565	74438527	33378518	1	1		1	1	1	0	0	0	1
56153565	74438527	33378518	1		1	1	1	1	0	0	0	1
21858458	18511162	33378518	1	0	0	1	1	1			0	1
21858458	18511162	33378518	1	1		1	1	1	0	0	0	1
21858458	18511162	33378518	1		1	1	1	1	0	0	0
13111818	72778822	33378518	1		1	0	0	1	1	0	0	0
14612534	41517882	33378518	1		1	0	0	1	1	0	0
42143817	38565143	28118583	1	0	0	1	1	1			0	0
42143817	38565143	28118583	1	1		1	1	1	0	0	0	1
42143817	38565143	28118583	1		1	1	1	1	0	0	0	1
58362268	56178535	28118583	1	1		0	1	0	1	0
17477574	53456446	28118583	1	0	0	1	1	1			0	0
17477574	53456446	28118583	1	1		1	1	1	0	0	0	1
17477574	53456446	28118583	1		1	1	1	1	0	0	0
52678571	71741546	28118583	1	0	0	1	1	1			0	0
52678571	71741546	28118583	1	1		1	1	1	0	0	0	1
52678571	71741546	28118583	1		1	1	1	1	0	0	0	0
13867467	23114577	28118583	1	0	0	1	1	0			0	0
13867467	23114577	28118583	1	1		1	1	0	0	0	0	0
61761832	81725581	28118583	1	0	0	1	1	1			0	1
61761832	81725581	28118583	1	1		1	1	1	0	0	0	1
61761832	81725581	28118583	1		1	1	1	1	0	0	0
74225586	68627846	28118583	1	0	0	1	1	1			0	0
74225586	68627846	28118583	1	1		1	1	1	0	0	0	1
74225586	68627846	28118583	1		1	1	1	1	0	0	0	1
33328745	55218484	28118583	1	0	0	1	1	1			0	0
33328745	55218484	28118583	1	1		1	1	1	0	0	0	1
33328745	55218484	28118583	1		1	1	1	1	0	0	0	0
78516474	86578116	86667788	1	0	0	1	0	0
41787341	41118282	86667788	1	0	0	1	1	1			0	1
41787341	41118282	86667788	1	1		1	1	1	0	0	0	1
41787341	41118282	86667788	1		1	1	1	1	0	0	0	1
64858441	41118282	86667788	1	1		0	1	1	1	0	0	1
64858441	41118282	86667788	1		1	0	1	1	1	0	0	1
88112446	82278656	67875158	1	0	0	1	0	0			0	0
51251882	82278656	67875158	1	1		0	1	0	1	0	0	0
86421145	82536425	87217632	1	0	0	1	0	0			0	0
25783757	82536425	87217632	1	1		0	1	0	1	0	0
14848885	82536425	87217632	1		1	0	0	1	1	0	0	0
56262716	24311618	87217632	1	0	0	1	1	1			0	0
56262716	24311618	87217632	1	1		1	1	1	0	0	0	0
56262716	24311618	87217632	1		1	1	1	1	0	0	0	1
53634532	24846721	87217632	1	0	0	1	1	1			0	1
53634532	24846721	87217632	1	1		1	1	1	0	0	0	1
53634532	24846721	87217632	1		1	1	1	1	0	0	0
83752521	41556748	87217632	1	0	0	1	1	1			0	1
83752521	41556748	87217632	1	1		1	1	1	0	0	0	1
83752521	41556748	87217632	1		1	1	1	1	0	0	0	1
57143475	56882342	87217632	1	1		0	1	0	1	0
71531337	56882342	87217632	1		1	0	0	1	1	0	0	0
42616723	16346234	87217632	1	0	0	1	1	0			0	1
42616723	16346234	87217632	1	1		1	1	0	0	0	0	1
15844657	16346234	87217632	1	0	0	1	1	1			0	1
15844657	16346234	87217632	1	1		1	1	1	0	0	0	1
15844657	16346234	87217632	1		1	1	1	1	0	0	0
72234875	66466761	87217632	1	1		0	1	1	0	1	0	1
72234875	66466761	87217632	1		1	0	1	1	0	1
47884282	31388558	87217632	1	0	0	1	1	1
47884282	31388558	87217632	1	1		1	1	1	0	0	0	1
47884282	31388558	87217632	1		1	1	1	1	0	0	0	1
61278242	36778461	87217632	1	0	0	1	1	1			0	0
61278242	36778461	87217632	1	1		1	1	1	0	0	1	1
61278242	36778461	87217632	1		1	1	1	1	0	0
32532825	36778461	87217632	1	0	0	1	1	1			0	1
32532825	36778461	87217632	1	1		1	1	1	0	0	0	1
32532825	36778461	87217632	1		1	1	1	1	0	0	0
43273213	63681417	87217632	1	1		0	1	0	0	1	0	1
22525372	66677658	87217632	1	1		0	1	0	1	0	0	0
58526647	77464452	36248633	1	0	0	1	1	1
58526647	77464452	36248633	1	1		1	1	1	0	0	0	0
58526647	77464452	36248633	1		1	1	1	1	0	0	0
52218687	31253271	36248633	1	0	0	1	0	0
41464644	45586147	36248633	1	0	0	1	1	1			0	0
41464644	45586147	36248633	1	1		1	1	1	0	0	0	1
41464644	45586147	36248633	1		1	1	1	1	0	0	0
88113754	86584481	36248633	1	0	0	1	1	0			0	0
88113754	86584481	36248633	1	1		1	1	0	0	0	0	1
86656452	74411466	36248633	1	0	0	1	1	1			0	1
86656452	74411466	36248633	1	1		1	1	1	0	0	0	1
86656452	74411466	36248633	1		1	1	1	1	0	0	0	1
88784647	74411466	36248633	1		1	0	0	1	1	0	0
38178781	74758758	27342785	1	1		0	1	1	1	0	0	1
38178781	74758758	27342785	1		1	0	1	1	1	0	0	1
62212714	42181524	27342785	1	0	0	1	0	0
35211315	42181524	27342785	1	1		0	1	0	1	0	0	1
64846782	16841146	27342785	1	0	0	1	1	1			0	1
64846782	16841146	27342785	1	1		1	1	1	0	0	0
64846782	16841146	27342785	1		1	1	1	1	0	0
72653332	16841146	27342785	1		1	0	0	1	1	0	0	0
51472434	31865774	27342785	1	0	0	1	0	0			0	1
73253242	62742553	27342785	1		1	0	0	1	1	0	0
84754521	66252873	38436158	1	0	0	1	1	1			0	1
84754521	66252873	38436158	1	1		1	1	1	0	0	0	1
84754521	66252873	38436158	1		1	1	1	1	0	0	0
63761231	66252873	38436158	1	1		0	1	0	1	0	0
58865528	86783663	38436158	1	0	0	1	0	0
85854551	37645865	38436158	1	0	0	1	0	0			0	0
21487262	46123167	38436158	1	0	0	1	1	1			0	1
21487262	46123167	38436158	1	1		1	1	1	0	0	0
21487262	46123167	38436158	1		1	1	1	1	0	0	0	0
15884684	46123167	38436158	1	0	0	1	0	0
74624633	46123167	38436158	1	0	0	1	0	0			0	1
15668866	18832882	38436158	1	0	0	1	0	0			0	0
73753354	18832882	38436158	1		1	0	0	1	0	1	0	1
42426821	18832882	38436158	1		1	0	0	1	1	0	0
36247861	65664357	38436158	1	0	0	1	0	0			0	1
57271824	34465872	38436158	1	0	0	1	1	0			0	0
57271824	34465872	38436158	1	1		1	1	0	0	0
32772423	34465872	38436158	1	0	0	1	0	0			0	1
82282167	34465872	38436158	1	1		0	1	1	1	0	0
82282167	34465872	38436158	1		1	0	1	1	1	0	0	1
81178534	24473384	38436158	1	0	0	1	1	1			0	0
81178534	24473384	38436158	1	1		1	1	1	0	0	0	1
81178534	24473384	38436158	1		1	1	1	1	0	0	0	1
32412756	13651148	38436158	1		1	0	0	1	0	1	0
11566417	48424842	38436158	1	1		0	1	1	1	0	0
11566417	48424842	38436158	1		1	0	1	1	1	0	0	0
65353452	22643386	38436158	1	1		0	1	1	1	0	1	0
65353452	22643386	38436158	1		1	0	1	1	1	0	0	0
52155146	68736282	38436158	1	1		0	1	1	0	1	0	1
52155146	68736282	38436158	1		1	0	1	1	0	1	1	1
58882814	65833764	38436158	1	1		0	1	0	0	1	0	1
52731342	65833764	38436158	1	1		0	1	0	1	0
52448162	61616771	36236123	1		1	0	0	1	1	0	0	0
24317373	28564255	36236123	1	0	0	1	1	1			0	1
24317373	28564255	36236123	1	1		1	1	1	0	0	0	0
24317373	28564255	36236123	1		1	1	1	1	0	0	0	1
82658438	45176313	36236123	1	0	0	1	0	0
84257284	61435611	36236123	1	0	0	1	1	1			0	1
84257284	61435611	36236123	1	1		1	1	1	0	0	0	1
84257284	61435611	36236123	1		1	1	1	1	0	0	0	1
12355825	61435611	36236123	1		1	0	0	1	1	0	0	0
14783867	83688248	78674788	1	0	0	1	1	1			0	0
14783867	83688248	78674788	1	1		1	1	1	0	0	0	0
14783867	83688248	78674788	1		1	1	1	1	0	0	0	1
57883168	83688248	78674788	1	0	0	1	1	1			0	0
57883168	83688248	78674788	1	1		1	1	1	0	0	0	0
57883168	83688248	78674788	1		1	1	1	1	0	0	0	1
76152428	83688248	78674788	1		1	0	0	1	1	0	0	0
25557818	44357786	51787714	1	1		0	1	0	0	1	0
87751317	44357786	51787714	1	1		0	1	1	1	0	0	0
87751317	44357786	51787714	1		1	0	1	1	1	0	0	0
58446733	32388312	51787714	1	1		0	1	1	1	0
58446733	32388312	51787714	1		1	0	1	1	1	0	0	1
45637837	45274874	51787714	1	0	0	1	1	0			0	1
45637837	45274874	51787714	1	1		1	1	0	0	0
45413553	76216162	18788617	1	0	0	1	1	0				0
45413553	76216162	18788617	1	1		1	1	0	0	0	0	0
21347318	68127133	18788617	1	0	0	1	0	0			0	0
75353226	18537722	18788617	1	0	0	1	1	1			0	1
75353226	18537722	18788617	1	1		1	1	1	0	0	0
75353226	18537722	18788617	1		1	1	1	1	0	0
85257575	11624112	84421675	1	1		0	1	0	0	1	0
16231725	57882222	84421675	1	1		0	1	1	0	1	0	0
16231725	57882222	84421675	1		1	0	1	1	0	1	0
73477376	57882222	84421675	1	1		0	1	1	0	1	0	0
73477376	57882222	84421675	1		1	0	1	1	0	1
67343722	57882222	84421675	1	1		0	1	1	0	1	0	0
67343722	57882222	84421675	1		1	0	1	1	0	1
82547487	76461452	84421675	1		1	0	0	1	0	1	0
63582235	14245638	54853545	1	1		0	1	0	0	1	0
44636562	66728522	54853545	1	0	0	1	0	0			0	1
66376883	66728522	54853545	1	0	0	1	1	0			0	0
66376883	66728522	54853545	1	1		1	1	0	0	0	0	0
84331358	81842755	18667718	1	1		0	1	1	0	1
84331358	81842755	18667718	1		1	0	1	1	0	1	0	1
77543714	77755813	18667718	1		1	0	0	1	1	0	0	0
16154722	81186313	18667718	1	0	0	1	1	0			0	0
16154722	81186313	18667718	1	1		1	1	0	0	0	0	1
81733524	81186313	18667718	1	0	0	1	1	0			0	1
81733524	81186313	18667718	1	1		1	1	0	0	0	0	0
14667121	25451853	83864623	1	0	0	1	0	0			0	0
18387182	33117565	83864623	1	0	0	1	1	1			0	0
18387182	33117565	83864623	1	1		1	1	1	0	0	0	0
18387182	33117565	83864623	1		1	1	1	1	0	0	0	0
75537133	63542822	45563853	1	0	0	1	1	1
75537133	63542822	45563853	1	1		1	1	1	0	0	0
75537133	63542822	45563853	1		1	1	1	1	0	0	0	1
78416465	11847813	45563853	1		1	0	0	1	1	0	0	1
28551633	76442415	36212187	1	0	0	1	1	1			0	0
28551633	76442415	36212187	1	1		1	1	1	0	0
28551633	76442415	36212187	1		1	1	1	1	0	0	0	1
67644185	76442415	36212187	1	1		0	1	0	1	0	0	0
13524685	26144638	55442135	1	0	0	1	1	1			0	0
13524685	26144638	55442135	1	1		1	1	1	0	0	0	0
13524685	26144638	55442135	1		1	1	1	1	0	0
12628634	36876125	28187548	1	1		0	1	1	0	1	0	1
12628634	36876125	28187548	1		1	0	1	1	0	1
73547272	85338815	28187548	1	0	0	1	1	1
73547272	85338815	28187548	1	1		1	1	1	0	0	0	1
73547272	85338815	28187548	1		1	1	1	1	0	0	0	1
15743212	85338815	28187548	1	0	0	1	1	1
15743212	85338815	28187548	1	1		1	1	1	0	0	0	1
15743212	85338815	28187548	1		1	1	1	1	0	0	0	1
43463244	35226737	28187548	1		1	0	0	1	0	1
75527867	57131351	58342536	1	0	0	1	1	1			0	1
75527867	57131351	58342536	1	1		1	1	1	0	0	0
75527867	57131351	58342536	1		1	1	1	1	0	0	0	1
53584452	84154433	63754713	1	0	0	1	1	1
53584452	84154433	63754713	1	1		1	1	1	0	0
53584452	84154433	63754713	1		1	1	1	1	0	0	0
74554417	13671131	74118771	1	0	0	1	1	1			0	0
74554417	13671131	74118771	1	1		1	1	1	0	0
74554417	13671131	74118771	1		1	1	1	1	0	0	0
64126645	13671131	74118771	1	0	0	1	1	1			0
64126645	13671131	74118771	1	1		1	1	1	0	0	0
64126645	13671131	74118771	1		1	1	1	1	0	0	0
82352786	82282568	74118771	1	0	0	1	1	1			0	0
82352786	82282568	74118771	1	1		1	1	1	0	0
82352786	82282568	74118771	1		1	1	1	1	0	0	0	0
35722226	82282568	74118771	1		1	0	0	1	1	0	0
18866176	26724526	74118771	1	0	0	1	1	1			0	0
18866176	26724526	74118771	1	1		1	1	1	0	0	0	0
18866176	26724526	74118771	1		1	1	1	1	0	0	0
46736121	26724526	74118771	1	0	0	1	1	1			0	0
46736121	26724526	74118771	1	1		1	1	1	0	0	0	0
46736121	26724526	74118771	1		1	1	1	1	0	0	0
34636877	16143432	74118771	1	0	0	1	1	1			0	1
34636877	16143432	74118771	1	1		1	1	1	0	0	0
34636877	16143432	74118771	1		1	1	1	1	0	0	0
18371172	77377213	63331484	1	0	0	1	1	0			0	0
18371172	77377213	63331484	1	1		1	1	0	0	0	0	0
22234855	77377213	63331484	1		1	0	0	1	1	0	0	0
37535345	18811558	53786255	1	0	0	1	1	1
37535345	18811558	53786255	1	1		1	1	1	0	0	0	1
37535345	18811558	53786255	1		1	1	1	1	0	0	0	1
61286644	18811558	53786255	1	0	0	1	1	1			0	0
61286644	18811558	53786255	1	1		1	1	1	0	0	0	1
61286644	18811558	53786255	1		1	1	1	1	0	0	0	1
18726251	18811558	53786255	1	0	0	1	1	0			0	1
18726251	18811558	53786255	1	1		1	1	0	0	0	0	0
35335815	14831826	53786255	1		1	0	0	1	1	0	0
54116181	75333281	53786255	1		1	0	0	1	0	1	0	0
84161413	22162845	53786255	1	0	0	1	1	1			0	0
84161413	22162845	53786255	1	1		1	1	1	0	0	0	1
84161413	22162845	53786255	1		1	1	1	1	0	0	0	0
23858322	71234462	53786255	1	0	0	1	1	1			0	0
23858322	71234462	53786255	1	1		1	1	1	0	0	0	1
23858322	71234462	53786255	1		1	1	1	1	0	0	0
44543581	44536671	13847282	1	1		0	1	1	1	0	0	0
44543581	44536671	13847282	1		1	0	1	1	1	0	0	0
32353333	31683413	13847282	1	1		0	1	1	1	0	0	0
32353333	31683413	13847282	1		1	0	1	1	1	0	0	0
25181151	61213488	13847282	1	0	0	1	1	1			0
25181151	61213488	13847282	1	1		1	1	1	0	0	0	0
25181151	61213488	13847282	1		1	1	1	1	0	0	0	0
23885474	12133736	13847282	1	1		0	1	1	1	0	0	0
23885474	12133736	13847282	1		1	0	1	1	1	0	0	0
71164232	28152278	71651563	1	0	0	1	1	0			0	1
71164232	28152278	71651563	1	1		1	1	0	0	0	0	1
27255542	42211428	12531261	1	0	0	1	0	0			0	0
55148814	42211428	12531261	1	0	0	1	1	1				0
55148814	42211428	12531261	1	1		1	1	1	0	0	0	1
55148814	42211428	12531261	1		1	1	1	1	0	0	0	1
61378233	42211428	12531261	1	0	0	1	0	0			0	1
44157654	16277865	15386218	1		1	0	0	1	1	0
42388858	15344166	15386218	1	0	0	1	1	1
42388858	15344166	15386218	1	1		1	1	1	0	0	0	0
42388858	15344166	15386218	1		1	1	1	1	0	0
18735667	18534232	15386218	1	0	0	1	1	1			0	1
18735667	18534232	15386218	1	1		1	1	1	0	0	0	1
18735667	18534232	15386218	1		1	1	1	1	0	0	0	1
18674265	18534232	15386218	1		1	0	0	1	1	0	0	0
31281643	17641566	15386218	1	1		0	1	1	0	0	0	0
31281643	17641566	15386218	1		1	0	1	1	0	0	0	0
68311363	17641566	15386218	1	0	0	1	1	1			0	0
68311363	17641566	15386218	1	1		1	1	1	0	0	0	0
68311363	17641566	15386218	1		1	1	1	1	0	0	0
16583173	17641566	15386218	1		1	0	0	1	1	0	0	0
68421527	68327561	15386218	1	1		0	1	1	1	0	0	0
68421527	68327561	15386218	1		1	0	1	1	1	0	0	0
86672488	71618677	24514477	1	0	0	1	0	1			0
86672488	71618677	24514477	1		1	1	0	1	0	0	0	1
82737722	71618677	24514477	1	0	0	1	0	1			0
82737722	71618677	24514477	1		1	1	0	1	0	0	0
46585724	71618677	24514477	1		1	0	0	1	0	0	0	1
26257871	64862547	24514477	1	0	0	1	0	0			0
86217347	58842888	24514477	1	0	0	1	1	1			0	0
86217347	58842888	24514477	1	1		1	1	1	0	0	0
86217347	58842888	24514477	1		1	1	1	1	0	0	0
38318157	35633775	24514477	1		1	0	0	1	0	0
68524345	74534446	15512716	1	1		0	1	1	0	1	0	0
68524345	74534446	15512716	1		1	0	1	1	0	1	0	1
44713653	74534446	15512716	1	1		0	1	0	0	1	0	0
43583587	87452774	15512716	1	1		0	1	0	0	1	0	0
85186167	62323884	15512716	1		1	0	0	1	0	1	0	1
24142436	52738714	47712286	1	0	0	1	1	0			0
24142436	52738714	47712286	1	1		1	1	0	0	0	0	0
64182174	52738714	47712286	1	1		0	1	1	0	1	0	0
64182174	52738714	47712286	1		1	0	1	1	0	1	0	0
43232858	85573171	43211746	1	0	0	1	1	1			0
43232858	85573171	43211746	1	1		1	1	1	0	0	0	0
43232858	85573171	43211746	1		1	1	1	1	0	0	0
87272713	33724825	43211746	1	0	0	1	1	1			0
87272713	33724825	43211746	1	1		1	1	1	0	0	0	0
87272713	33724825	43211746	1		1	1	1	1	0	0	0
87837725	81764876	75623441	1	1		0	1	1	1	0	0	0
87837725	81764876	75623441	1		1	0	1	1	1	0	0	1
53132533	14134461	75623441	1	0	0	1	0	1			0
53132533	14134461	75623441	1		1	1	0	1	0	0	0	1
58751437	85364256	75623441	1		1	0	0	1	1	0
44831418	67743623	18772488	1	0	0	1	1	1			0	0
44831418	67743623	18772488	1	1		1	1	1	0	0	0	0
44831418	67743623	18772488	1		1	1	1	1	0	0	0	1
56253418	67743623	18772488	1	0	0	1	1	1			0	1
56253418	67743623	18772488	1	1		1	1	1	0	0	0	0
56253418	67743623	18772488	1		1	1	1	1	0	0	0
15286583	21764316	18772488	1	0	0	1	0	0
38763335	21764316	18772488	1	0	0	1	1	0			0	1
38763335	21764316	18772488	1	1		1	1	0	0	0
67436821	37874888	18772488	1		1	0	0	1	0	0	0
36514577	62834274	72721818	1	0	0	1	1	1			0	0
36514577	62834274	72721818	1	1		1	1	1	0	0	0
36514577	62834274	72721818	1		1	1	1	1	0	0	0
84814348	13452436	47846853	1	0	0	1	1	1			0	0
84814348	13452436	47846853	1	1		1	1	1	0	0	0
84814348	13452436	47846853	1		1	1	1	1	0	0	0
16677772	23852585	47846853	1	0	0	1	1	1			0	1
16677772	23852585	47846853	1	1		1	1	1	0	0	0	0
16677772	23852585	47846853	1		1	1	1	1	0	0	0
34836862	76841478	47846853	1		1	0	0	1	0	0	0
75786415	55445614	68662463	1	0	0	1	0	1
75786415	55445614	68662463	1		1	1	0	1	0	0	0	0
27831854	76627554	27231813	1	1		0	1	1	1	0	0	0
27831854	76627554	27231813	1		1	0	1	1	1	0	0	0
72436636	51174756	27231813	1		1	0	0	1	0	0	0	0
16735572	23634657	83124482	1		1	0	0	1	0	0	0	0
68684532	56566213	83124482	1	0	0	1	0	1
68684532	56566213	83124482	1		1	1	0	1	0	0	0
76656144	73638342	88717618	1	0	0	1	0	0			0	0
22327156	55888241	18553385	1	0	0	1	0	0			0	1
41482771	81337451	18553385	1		1	0	0	1	0	0	0	0
48431861	22254842	21121417	1		1	0	0	1	1	0	0
82141842	41188258	21121417	1	0	0	1	1	1
82141842	41188258	21121417	1	1		1	1	1	0	0	0
82141842	41188258	21121417	1		1	1	1	1	0	0	0	1
66876618	86343436	74265484	1	0	0	1	1	0
66876618	86343436	74265484	1	1		1	1	0	0	0	0	1
41351676	86343436	74265484	1	1		0	1	1	1	0	0	0
41351676	86343436	74265484	1		1	0	1	1	1	0	0	0
67116844	78853463	78252386	1	0	0	1	0	0			0	1
86463115	21874348	78252386	1	0	0	1	1	0			0	1
86463115	21874348	78252386	1	1		1	1	0	0	0	0	1
76454284	21874348	78252386	1	0	0	1	1	0
76454284	21874348	78252386	1	1		1	1	0	0	0	0	1
65553584	21874348	78252386	1	1		0	1	0	1	0	0	0
73843342	11142712	32258733	1	0	0	1	0	0				0
16678774	11142712	32258733	1		1	0	0	1	0	1	0
37572563	73882355	32258733	1	0	0	1	1	1			0	1
37572563	73882355	32258733	1	1		1	1	1	0	0	0	1
37572563	73882355	32258733	1		1	1	1	1	0	0	0
73574785	73882355	32258733	1	0	0	1	1	1				0
73574785	73882355	32258733	1	1		1	1	1	0	0	0
73574785	73882355	32258733	1		1	1	1	1	0	0	0	1
45131152	26415878	32258733	1	0	0	1	0	0
31265478	14224528	38627676	1		1	0	0	1	1	0	0	0
36475427	41475588	38627676	1	0	0	1	1	0			0	0
36475427	41475588	38627676	1	1		1	1	0	0	0	0	0
48477354	13646817	56752556	0	0	0	1	0	0			0	1
82657856	15546575	56752556	0	0	0	1	0	0			0	0
33523468	15546575	56752556	0	0	0	1	0	0
61113167	86744832	56752556	0	0	0	1	0	0			0	1
55274367	13235163	45541538	1	0	0	1	1	1			0	0
55274367	13235163	45541538	1	1		1	1	1	0	0	0	0
55274367	13235163	45541538	1		1	1	1	1	0	0	0
21154625	13235163	45541538	1	0	0	1	0	0			0	0
42785262	56578418	64632741	1	0	0	1	1	1			0	0
42785262	56578418	64632741	1	1		1	1	1	0	0	0	0
42785262	56578418	64632741	1		1	1	1	1	0	0	0
74725358	56578418	64632741	1	0	0	1	1	1			0	1
74725358	56578418	64632741	1	1		1	1	1	0	0	0	0
74725358	56578418	64632741	1		1	1	1	1	0	0	0	0
76372274	56578418	64632741	1	0	0	1	1	1			0	1
76372274	56578418	64632741	1	1		1	1	1	0	0	0	1
76372274	56578418	64632741	1		1	1	1	1	0	0	0	1
61381371	56578418	64632741	1	1		0	1	1	1	0	0
61381371	56578418	64632741	1		1	0	1	1	1	0	0	0
52586568	38318848	81725787	1	0	0	1	1	1			0	1
52586568	38318848	81725787	1	1		1	1	1	0	0
52586568	38318848	81725787	1		1	1	1	1	0	0	0	0
54667813	15342521	81631182	1	0	0	1	1	1
54667813	15342521	81631182	1	1		1	1	1	0	0	0	0
54667813	15342521	81631182	1		1	1	1	1	0	0	0
84622828	55722685	74217435	1	0	0	1	1	0			0
84622828	55722685	74217435	1	1		1	1	0	0	0	0	1
62815575	55722685	74217435	1	1		0	1	0	1	0	0	0
31422614	86484315	74217435	1	0	0	1	0	0			0	1
76116873	87816337	45556436	1	0	0	1	0	0
62852417	84831621	45556436	1	0	0	1	0	0
28237314	52454752	33443837	1	0	0	1	1	0			0	0
28237314	52454752	33443837	1	1		1	1	0	0	0	0	1
41665458	52454752	33443837	1	0	0	1	0	0			0	0
16375357	31386725	86165512	1		1	0	0	1	1	0	0
72782554	53418611	86165512	1	0	0	1	1	1			0	0
72782554	53418611	86165512	1	1		1	1	1	0	0
72782554	53418611	86165512	1		1	1	1	1	0	0	0	1
86461131	53418611	86165512	1	0	0	1	0	0			0	0
84311412	53418611	86165512	1		1	0	0	1	1	0	0	0
52428717	53418611	86165512	1		1	0	0	1	0	1	0	1
54432586	83118185	87285551	1	0	0	1	1	1			0	1
54432586	83118185	87285551	1	1		1	1	1	0	0	0
54432586	83118185	87285551	1		1	1	1	1	0	0
48882262	83118185	87285551	1	0	0	1	1	0			0	0
48882262	83118185	87285551	1	1		1	1	0	0	0	0
23215352	83118185	87285551	1		1	0	0	1	1	0	0	0
11423461	35437753	87285551	1	0	0	1	0	0			0	1
82371644	57715184	64315724	1		1	0	0	1	0	1	0	0
86652225	72362411	64315724	1	0	0	1	1	1			0	0
86652225	72362411	64315724	1	1		1	1	1	0	0	0	0
86652225	72362411	64315724	1		1	1	1	1	0	0	0	1
33365363	35876221	64315724	1	1		0	1	0	1	0	0	0
14243865	82618837	53515351	1	0	0	1	1	0			0
14243865	82618837	53515351	1	1		1	1	0	0	0	0	0
44811182	82618837	53515351	1	0	0	1	0	0			0
46545326	41576412	27368311	1	0	0	1	0	1			0
46545326	41576412	27368311	1		1	1	0	1	0	0	0	1
65711413	54343453	27368311	1	0	0	1	0	1
65711413	54343453	27368311	1		1	1	0	1	0	0	0	1
42264718	54343453	27368311	1	0	0	1	0	1
42264718	54343453	27368311	1		1	1	0	1	0	0
61674618	54343453	27368311	1		1	0	0	1	0	0	0	0
16238273	18776325	27368311	1		1	0	0	1	0	1	0	0
72141388	56518228	43538436	1	0	0	1	1	0			0	0
72141388	56518228	43538436	1	1		1	1	0	0	0
48146638	54264827	43538436	1	0	0	1	0	0			0	0
68812263	16328416	43538436	1		1	0	0	1	0	1	0	0
83253287	13652344	63764888	1	0	0	1	1	1			0	0
83253287	13652344	63764888	1	1		1	1	1	0	0	0
83253287	13652344	63764888	1		1	1	1	1	0	0	0
32751537	13652344	63764888	1		1	0	0	1	1	0	0	0
88851645	47225137	63764888	1		1	0	0	1	1	0	0	0
18866648	23817711	63764888	1	1		0	1	1	1	0	0	0
18866648	23817711	63764888	1		1	0	1	1	1	0	0
84785632	34825486	85123384	0	0	0	1	0	0			0	0
25374863	27424644	85123384	0	1		0	1	1	0	1	0	0
25374863	27424644	85123384	0		1	0	1	1	0	1
53618767	26833761	18578747	1		1	0	0	1	1	0	0	0
58132764	64267678	87825857	1	1		0	1	1	0	1
58132764	64267678	87825857	1		1	0	1	1	0	1
36223345	64267678	87825857	1		1	0	0	1	1	0	0	0
45453435	56463225	87825857	1	0	0	1	0	1			0	0
45453435	56463225	87825857	1		1	1	0	1	0	0	0	0
62336181	71365684	87825857	1	0	0	1	0	0			0	0
63878433	27586546	87825857	1	0	0	1	1	1			0	0
63878433	27586546	87825857	1	1		1	1	1	0	0
63878433	27586546	87825857	1		1	1	1	1	0	0	0	1
43632635	27586546	87825857	1	1		0	1	1	1	0
43632635	27586546	87825857	1		1	0	1	1	1	0	0	0
38843642	76183666	85768346	1	0	0	1	1	1			0	0
38843642	76183666	85768346	1	1		1	1	1	0	0	0	1
38843642	76183666	85768346	1		1	1	1	1	0	0	0	1
15765146	76183666	85768346	1	0	0	1	1	1			0	1
15765146	76183666	85768346	1	1		1	1	1	0	0	0	1
15765146	76183666	85768346	1		1	1	1	1	0	0
35855262	76183666	85768346	1		1	0	0	1	1	0	0	1
18873132	16716428	85768346	1	0	0	1	0	0			0	0
75843673	53852767	85768346	1	1		0	1	0	0	1	0	1
32586211	53852767	85768346	1		1	0	0	1	1	0	0
35368413	81235133	34278482	1	0	0	1	1	1			0	0
35368413	81235133	34278482	1	1		1	1	1	0	0
35368413	81235133	34278482	1		1	1	1	1	0	0	0	1
27668168	81235133	34278482	1	1		0	1	1	1	0	0	0
27668168	81235133	34278482	1		1	0	1	1	1	0	0	0
44375873	72662847	34278482	1	0	0	1	1	0			0	0
44375873	72662847	34278482	1	1		1	1	0	0	0	0	1
33653868	72662847	34278482	1		1	0	0	1	1	0	0
24117553	38616436	18512351	0	0	0	1	0	0			0	1
75157834	16172512	18512351	0	0	0	1	0	0			0	1
47413361	66326848	56538136	1	1		0	1	1	0	1	0
47413361	66326848	56538136	1		1	0	1	1	0	1	0
54468886	67244828	56538136	1	0	0	1	1	1			0	1
54468886	67244828	56538136	1	1		1	1	1	0	0	0	1
54468886	67244828	56538136	1		1	1	1	1	0	0	0
12774731	67244828	56538136	1	1		0	1	1	1	0	0	0
12774731	67244828	56538136	1		1	0	1	1	1	0	0
61447818	71885416	56538136	1	0	0	1	0	0			0	0
13433173	66261253	56538136	1		1	0	0	1	1	0	0
81435772	66213163	56538136	1	1		0	1	0	1	0	0	1
27537817	22464312	83725576	1	0	0	1	1	1			0	0
27537817	22464312	83725576	1	1		1	1	1	0	0	0	1
27537817	22464312	83725576	1		1	1	1	1	0	0	0	1
65817248	71172762	83725576	1	1		0	1	1	0	1	0	1
65817248	71172762	83725576	1		1	0	1	1	0	1	0	1
34637632	55243157	34665148	1	1		0	1	1	0	1	0	0
34637632	55243157	34665148	1		1	0	1	1	0	1	0	1
42427125	73656685	26712364	1	0	0	1	1	1			0	1
42427125	73656685	26712364	1	1		1	1	1	0	0
42427125	73656685	26712364	1		1	1	1	1	0	0	0	0
36146383	33744536	15326175	1	0	0	1	1	1
36146383	33744536	15326175	1	1		1	1	1	0	0	0	1
36146383	33744536	15326175	1		1	1	1	1	0	0	0	1
66287112	32736253	15326175	1	0	0	1	0	1			0	1
66287112	32736253	15326175	1		1	1	0	1	0	0	0	0
52514323	32736253	15326175	1	1		0	1	1	1	0	0
52514323	32736253	15326175	1		1	0	1	1	1	0	0	0
47462727	32736253	15326175	1		1	0	0	1	1	0	0	0
68515544	34211445	33236573	1		1	0	0	1	1	0	0
86826343	46334568	71852435	0	0	0	1	1	1			0	0
86826343	46334568	71852435	0	1		1	1	1	0	0
86826343	46334568	71852435	0		1	1	1	1	0	0	0	0
27485576	12734644	71852435	0	1		0	1	0	0	0	0	1
75721844	83583385	64547551	0	0	0	1	0	0			0	0
75871585	83583385	64547551	0	1		0	1	1	1	0	0
75871585	83583385	64547551	0		1	0	1	1	1	0	0	1
46632681	88734845	64547551	0		1	0	0	1	1	0	0	0
31216515	28582743	64547551	0		1	0	0	1	1	0	0	0
14375173	78532678	41478771	1	0	0	1	1	0			0	1
14375173	78532678	41478771	1	1		1	1	0	0	0	0	1
78254545	78532678	41478771	1	1		0	1	1	1	0
78254545	78532678	41478771	1		1	0	1	1	1	0	0	1
74438585	47345855	63881862	1	0	0	1	0	1			0	0
74438585	47345855	63881862	1		1	1	0	1	0	0
22524667	47345855	63881862	1	0	0	1	0	0			0	0
45838173	47345855	63881862	1	1		0	1	0	1	0	0
45534658	32781117	38852464	1	0	0	1	0	0
35526184	48586735	38852464	1	0	0	1	1	0			0	0
35526184	48586735	38852464	1	1		1	1	0	0	0	0	0
62522243	48586735	38852464	1	0	0	1	1	1			0	1
62522243	48586735	38852464	1	1		1	1	1	0	0
62522243	48586735	38852464	1		1	1	1	1	0	0	0	0
11744773	68226565	78228716	1	0	0	1	0	0
76445231	26518162	78228716	1	0	0	1	1	1			0	1
76445231	26518162	78228716	1	1		1	1	1	0	0	0	1
76445231	26518162	78228716	1		1	1	1	1	0	0
14754622	26518162	78228716	1	0	0	1	1	0			0	1
14754622	26518162	78228716	1	1		1	1	0	0	0	0	1
76326614	14311544	34581322	1	0	0	1	1	1
76326614	14311544	34581322	1	1		1	1	1	0	0	0	1
76326614	14311544	34581322	1		1	1	1	1	0	0	0	1
58527816	57264751	34581322	1	0	0	1	1	1			0	0
58527816	57264751	34581322	1	1		1	1	1	0	0	0	1
58527816	57264751	34581322	1		1	1	1	1	0	0	0	1
67446836	57264751	34581322	1	0	0	1	1	1			0	1
67446836	57264751	34581322	1	1		1	1	1	0	0	0
67446836	57264751	34581322	1		1	1	1	1	0	0	0	1
57651826	34328888	34581322	1	0	0	1	1	1
57651826	34328888	34581322	1	1		1	1	1	0	0	1	1
57651826	34328888	34581322	1		1	1	1	1	0	0	0	1
83721334	54137768	26247714	0	0	0	1	0	0			0	1
68648846	54137768	26247714	0		1	0	0	1	1	0	0	1
13615667	78145585	26247714	0		1	0	0	1	1	0	0	0
56624171	78145585	26247714	0		1	0	0	1	0	0	0	0
41512564	78145585	26247714	0		1	0	0	1	1	0	0
41251473	11224271	24435322	1	0	0	1	1	0
41251473	11224271	24435322	1	1		1	1	0	0	0	0	0
71211546	11224271	24435322	1	0	0	1	1	0			0	0
71211546	11224271	24435322	1	1		1	1	0	0	0	0	1
31646562	41852743	24435322	1	0	0	1	0	1
31646562	41852743	24435322	1		1	1	0	1	0	0	0	1
37675131	41852743	24435322	1	1		0	1	1	1	0	0	0
37675131	41852743	24435322	1		1	0	1	1	1	0
36735467	66645215	81143143	1	0	0	1	1	1			0	0
36735467	66645215	81143143	1	1		1	1	1	0	0	0	0
36735467	66645215	81143143	1		1	1	1	1	0	0	0	1
63335883	43751326	81143143	1	1		0	1	1	1	0	0	0
63335883	43751326	81143143	1		1	0	1	1	1	0	0	1
32541471	76756311	67678141	1	0	0	1	1	1			0	0
32541471	76756311	67678141	1	1		1	1	1	0	0	0	0
32541471	76756311	67678141	1		1	1	1	1	0	0	0	0
42843526	43845117	85171545	1	0	0	1	1	1			0	1
42843526	43845117	85171545	1	1		1	1	1	0	0	0	0
42843526	43845117	85171545	1		1	1	1	1	0	0	0
65862776	43845117	85171545	1	0	0	1	1	1			0	1
65862776	43845117	85171545	1	1		1	1	1	0	0	0	1
65862776	43845117	85171545	1		1	1	1	1	0	0	0
66743157	12882657	35266388	1	0	0	1	0	0			0	0
34487652	12882657	35266388	1	1		0	1	1	1	0	0	0
34487652	12882657	35266388	1		1	0	1	1	1	0	0	0
48323722	18132543	64188553	1	0	0	1	0	1
48323722	18132543	64188553	1		1	1	0	1	0	0	0	1
46242751	18132543	64188553	1	0	0	1	0	0			0	1
37245521	18132543	64188553	1	1		0	1	1	0	1	0	1
37245521	18132543	64188553	1		1	0	1	1	0	1	0
16758165	77836123	21214588	1	0	0	1	1	1			0	1
16758165	77836123	21214588	1	1		1	1	1	0	0	0	1
16758165	77836123	21214588	1		1	1	1	1	0	0	0	0
28171572	77836123	21214588	1	0	0	1	1	1			0	0
28171572	77836123	21214588	1	1		1	1	1	0	0
28171572	77836123	21214588	1		1	1	1	1	0	0	0	1
43238888	77836123	21214588	1	1		0	1	1	1	0	0	1
43238888	77836123	21214588	1		1	0	1	1	1	0	0	1
87482125	81243614	21214588	1	0	0	1	0	0			0
67852361	14847372	21214588	1	1		0	1	0	0	1	0	1
12668724	78227433	21214588	1	1		0	1	0	0	1	0
23217347	17533687	21214588	1		1	0	0	1	1	0	0	1
83736747	87436431	32246655	1	0	0	1	1	1			0	0
83736747	87436431	32246655	1	1		1	1	1	0	0	0	0
83736747	87436431	32246655	1		1	1	1	1	0	0	0
77641658	77485734	83825341	1	0	0	1	1	1			0	0
77641658	77485734	83825341	1	1		1	1	1	0	0	0	0
77641658	77485734	83825341	1		1	1	1	1	0	0	0	1
58148161	77485734	83825341	1	0	0	1	1	1			0	0
58148161	77485734	83825341	1	1		1	1	1	0	0	0	0
58148161	77485734	83825341	1		1	1	1	1	0	0	0	1
12332244	85663417	43712672	1	0	0	1	1	0			0	1
12332244	85663417	43712672	1	1		1	1	0	0	0	0	1
17172625	85663417	43712672	1	1		0	1	0	1	0	0	0
74666178	81463641	43712672	1	0	0	1	1	0			0	1
74666178	81463641	43712672	1	1		1	1	0	0	0	0
37255884	43433871	45318772	1	0	0	1	0	0			0	1
15842686	22547255	57748575	1	1		0	1	1	1	0
15842686	22547255	57748575	1		1	0	1	1	1	0	0
88586168	22547255	57748575	1		1	0	0	1	0	0	0
38538151	66674761	62256155	1	0	0	1	0	0			0	0
33861316	38886882	62256155	1	0	0	1	1	0			0	1
33861316	38886882	62256155	1	1		1	1	0	0	0	0	0
68188564	78278148	62256155	1	1		0	1	0	1	0	0
81622671	22873424	67451214	1	0	0	1	1	1			0	0
81622671	22873424	67451214	1	1		1	1	1	0	0	0	0
81622671	22873424	67451214	1		1	1	1	1	0	0	0	0
81233563	22873424	67451214	1		1	0	0	1	1	0	0	0
58637875	43412481	67451214	1	0	0	1	1	0
58637875	43412481	67451214	1	1		1	1	0	0	0
14541354	62485172	48868563	0	0	0	1	1	1			0	0
14541354	62485172	48868563	0	1		1	1	1	0	0	0
14541354	62485172	48868563	0		1	1	1	1	0	0	0
45561632	41587245	53835331	1	0	0	1	1	0			0	1
45561632	41587245	53835331	1	1		1	1	0	0	0	0	1
12471257	45376381	35544276	1	0	0	1	0	1			0	0
12471257	45376381	35544276	1		1	1	0	1	0	0	1	0
46714785	45376381	35544276	1	0	0	1	0	1			0
46714785	45376381	35544276	1		1	1	0	1	0	0
47863188	45376381	35544276	1		1	0	0	1	1	0
13134668	82773317	35544276	1	0	0	1	1	1			0	0
13134668	82773317	35544276	1	1		1	1	1	0	0
13134668	82773317	35544276	1		1	1	1	1	0	0	0	0
74847611	82773317	35544276	1	1		0	1	1	1	0	0	0
74847611	82773317	35544276	1		1	0	1	1	1	0	0	0
18171837	55455733	75517325	1	0	0	1	1	1			0	1
18171837	55455733	75517325	1	1		1	1	1	0	0	0
18171837	55455733	75517325	1		1	1	1	1	0	0	0
38888314	55455733	75517325	1	0	0	1	1	1			0	0
38888314	55455733	75517325	1	1		1	1	1	0	0	0
38888314	55455733	75517325	1		1	1	1	1	0	0	0
37623575	18733211	75517325	1	0	0	1	0	0			0	0
77283577	88724765	75517325	1	0	0	1	1	1			0	0
77283577	88724765	75517325	1	1		1	1	1	0	0	0
77283577	88724765	75517325	1		1	1	1	1	0	0	0
45564287	52568357	75517325	1		1	0	0	1	1	0	0
68465353	56812382	75517325	1	0	0	1	1	1			0	0
68465353	56812382	75517325	1	1		1	1	1	0	0	0
68465353	56812382	75517325	1		1	1	1	1	0	0	0
55126235	48117822	35676447	1	0	0	1	0	0			0	0
51188225	77136567	35676447	1	0	0	1	1	1			0	0
51188225	77136567	35676447	1	1		1	1	1	0	0	0	1
51188225	77136567	35676447	1		1	1	1	1	0	0	0	0
75383866	57538248	35676447	1	1		0	1	0	0	1	0	0
78251136	76751582	48436855	1	0	0	1	1	1			0	0
78251136	76751582	48436855	1	1		1	1	1	0	0	0
78251136	76751582	48436855	1		1	1	1	1	0	0	0	0
66875456	76751582	48436855	1	0	0	1	0	1			0	1
66875456	76751582	48436855	1		1	1	0	1	0	0	0	0
54171811	12223873	48436855	1	0	0	1	0	0			0	0
67431774	14736815	51652417	1	0	0	1	1	1			0	0
67431774	14736815	51652417	1	1		1	1	1	0	0	0	0
67431774	14736815	51652417	1		1	1	1	1	0	0	0
83714125	14736815	51652417	1	1		0	1	1	1	0
83714125	14736815	51652417	1		1	0	1	1	1	0	0
42613731	57744662	51652417	1		1	0	0	1	0	1	0
87725114	24512715	53118856	1	0	0	1	1	1
87725114	24512715	53118856	1	1		1	1	1	0	0	0	0
87725114	24512715	53118856	1		1	1	1	1	0	0	0	0
56517763	24512715	53118856	1		1	0	0	1	0	0	0
24383613	85266614	53118856	1	0	0	1	0	1			0	0
24383613	85266614	53118856	1		1	1	0	1	0	0	0	0
28118444	66113824	48135655	1	0	0	1	1	1			1
28118444	66113824	48135655	1	1		1	1	1	0	0	0	1
28118444	66113824	48135655	1		1	1	1	1	0	0	0	1
32245176	66113824	48135655	1	0	0	1	1	1
32245176	66113824	48135655	1	1		1	1	1	0	0	0	1
32245176	66113824	48135655	1		1	1	1	1	0	0
63163151	82155455	48135655	1	0	0	1	0	0			0	1
62482211	81178176	48135655	1	0	0	1	0	0			0	0
77122456	13477315	48135655	1		1	0	0	1	0	1	0
51525652	13477315	48135655	1		1	0	0	1	0	0	0	1
21475178	23771737	72281534	0	0	0	1	1	1			0	0
21475178	23771737	72281534	0	1		1	1	1	0	0	0	0
21475178	23771737	72281534	0		1	1	1	1	0	0	0	0
48533321	37621653	86622883	1	0	0	1	1	1			0	1
48533321	37621653	86622883	1	1		1	1	1	0	0
48533321	37621653	86622883	1		1	1	1	1	0	0	0
28745127	47544376	86622883	1	0	0	1	0	1			0	0
28745127	47544376	86622883	1		1	1	0	1	0	0	0
27378654	47544376	86622883	1		1	0	0	1	0	0	0	0
58152633	48478574	84251524	1	0	0	1	0	1			0	0
58152633	48478574	84251524	1		1	1	0	1	0	0	0	1
67187114	45763612	66471472	1	0	0	1	1	1			0	1
67187114	45763612	66471472	1	1		1	1	1	0	0	0
67187114	45763612	66471472	1		1	1	1	1	0	0	0	1
82146734	45763612	66471472	1		1	0	0	1	1	0	0	0
38257185	53586682	76576627	1	1		0	1	1	0	0	0
38257185	53586682	76576627	1		1	0	1	1	0	0	0
58678644	53586682	76576627	1	1		0	1	1	0	1
58678644	53586682	76576627	1		1	0	1	1	0	1	0
54187375	61467575	53423826	1	0	0	1	1	1
54187375	61467575	53423826	1	1		1	1	1	0	0	0	0
54187375	61467575	53423826	1		1	1	1	1	0	0	0	1
35115676	71548175	41256666	1	0	0	1	1	1			1	0
35115676	71548175	41256666	1	1		1	1	1	0	0	0	0
35115676	71548175	41256666	1		1	1	1	1	0	0	0	0
67466212	72828376	41256666	1	0	0	1	0	0			0	0
32145175	34352285	64255431	1		1	0	0	1	1	0	0	0
37444661	83455643	64255431	1	0	0	1	0	0
57276544	33682647	25381218	1		1	0	0	1	0	1	0
57813537	47466522	25381218	1	0	0	1	1	1			0	1
57813537	47466522	25381218	1	1		1	1	1	0	0	0
57813537	47466522	25381218	1		1	1	1	1	0	0	0
76346666	43773831	25381218	1		1	0	0	1	0	0	0
31426781	43773831	25381218	1		1	0	0	1	1	0	0
58243646	62372363	25381218	1		1	0	0	1	0	0	0
54673865	78327744	25381218	1	1		0	1	0	0	1	0	0
67156246	74566712	32771763	1	0	0	1	0	0
34823268	74566712	32771763	1	1		0	1	1	0	0	0	0
34823268	74566712	32771763	1		1	0	1	1	0	0	0
16442252	11335547	37346586	0	0	0	1	0	0			0	1
65254448	12853331	37346586	0		1	0	0	1	1	0	0	0
82287185	27324186	37346586	0	1		0	1	0	1	0
78644566	82574753	33868116	1	0	0	1	1	1			0
78644566	82574753	33868116	1	1		1	1	1	0	0	0	1
78644566	82574753	33868116	1		1	1	1	1	0	0	0
71328378	82574753	33868116	1	0	0	1	0	0			0
54752118	15437624	33868116	1	0	0	1	1	1			0
54752118	15437624	33868116	1	1		1	1	1	0	0	0	1
54752118	15437624	33868116	1		1	1	1	1	0	0	0
35673251	15437624	33868116	1	1		0	1	1	1	0	0	0
35673251	15437624	33868116	1		1	0	1	1	1	0	0
57515855	48351342	33868116	1	0	0	1	0	0			0
83865517	16113355	28215466	1		1	0	0	1	0	0	0	1
72367583	76722235	46436752	1	0	0	1	1	1			0
72367583	76722235	46436752	1	1		1	1	1	0	0	0
72367583	76722235	46436752	1		1	1	1	1	0	0	0	1
18364574	76722235	46436752	1	0	0	1	1	1			0	0
18364574	76722235	46436752	1	1		1	1	1	0	0	0
18364574	76722235	46436752	1		1	1	1	1	0	0	0	0
61125662	76722235	46436752	1		1	0	0	1	1	0	0	0
55642731	17335133	46436752	1	0	0	1	1	1
55642731	17335133	46436752	1	1		1	1	1	0	0	0	1
55642731	17335133	46436752	1		1	1	1	1	0	0	0	0
35574258	17335133	46436752	1		1	0	0	1	1	0	0	0
75251237	64843247	46436752	1	0	0	1	0	0			0	1
86345126	11141464	46436752	1		1	0	0	1	0	0	0
65427784	11141464	46436752	1	1		0	1	0	0	0	0
55321813	65385522	46436752	1	1		0	1	0	0	1	0	0
22283161	65385522	46436752	1	1		0	1	0	0	1	0
51518473	45333326	76658345	1	1		0	1	0	1	0	0
26615812	45333326	76658345	1	1		0	1	0	0	1	0	1
87883261	72564567	76658345	1		1	0	0	1	0	0	0
62862446	72564567	76658345	1		1	0	0	1	1	0	0
74586542	57117738	53356712	1	0	0	1	0	0
81485875	23188353	53356712	1	1		0	1	0	0	0	0	0
62121517	23188353	53356712	1		1	0	0	1	1	0	0
75452554	11161886	71426812	1	0	0	1	1	0			0
75452554	11161886	71426812	1	1		1	1	0	0	0	0	1
44873122	41688576	71426812	1		1	0	0	1	0	0	0
87742782	21361264	32636857	1	0	0	1	1	0			0
87742782	21361264	32636857	1	1		1	1	0	0	0	0	1
73428363	53833255	32636857	1	0	0	1	1	1			1	0
73428363	53833255	32636857	1	1		1	1	1	0	0	0	0
73428363	53833255	32636857	1		1	1	1	1	0	0
67161134	16728772	32636857	1	0	0	1	1	1			0	0
67161134	16728772	32636857	1	1		1	1	1	0	0	0	0
67161134	16728772	32636857	1		1	1	1	1	0	0	0	0
26684516	81487616	32636857	1	0	0	1	1	1			0	0
26684516	81487616	32636857	1	1		1	1	1	0	0	0	0
26684516	81487616	32636857	1		1	1	1	1	0	0	0	0
65213668	81487616	32636857	1		1	0	0	1	0	1	0
52236476	46158382	32636857	1		1	0	0	1	0	0	0
86541146	88443358	38783147	1		1	0	0	1	0	0	0
83327388	88382141	38783147	1	0	0	1	1	0			0	0
83327388	88382141	38783147	1	1		1	1	0	0	0	0
57726761	88382141	38783147	1	0	0	1	1	0
57726761	88382141	38783147	1	1		1	1	0	0	0	0	1
72787172	88382141	38783147	1	0	0	1	1	0			0
72787172	88382141	38783147	1	1		1	1	0	0	0	0	1
73162268	88382141	38783147	1		1	0	0	1	0	1	0	0
41234257	65642253	38783147	1	0	0	1	1	1
41234257	65642253	38783147	1	1		1	1	1	0	0
41234257	65642253	38783147	1		1	1	1	1	0	0	0	0
25726278	81826348	63748221	1	1		0	1	1	0	0	0	0
25726278	81826348	63748221	1		1	0	1	1	0	0	0	1
67485752	81826348	63748221	1	1		0	1	1	0	1	0	1
67485752	81826348	63748221	1		1	0	1	1	0	1	0
15411858	81826348	63748221	1	1		0	1	1	0	1	0	1
15411858	81826348	63748221	1		1	0	1	1	0	1	0
36465531	31327813	63748221	1		1	0	0	1	0	1	0	0
56411831	51528183	57717644	1	0	0	1	0	0			0	0
44338655	51528183	57717644	1	0	0	1	1	1			0	1
44338655	51528183	57717644	1	1		1	1	1	0	0	0
44338655	51528183	57717644	1		1	1	1	1	0	0	0	1
38555885	43282542	88327723	1	0	0	1	1	1			0	1
38555885	43282542	88327723	1	1		1	1	1	0	0	0	1
38555885	43282542	88327723	1		1	1	1	1	0	0	0
86246575	23883711	24758351	1	0	0	1	1	0
86246575	23883711	24758351	1	1		1	1	0	0	0	0	1
62364683	23883711	24758351	1	0	0	1	1	1			0	0
62364683	23883711	24758351	1	1		1	1	1	0	0	1	0
62364683	23883711	24758351	1		1	1	1	1	0	0	0
86575576	64214868	24487612	1	0	0	1	0	0			0	0
85486137	26224814	24487612	1	1		0	1	0	0	1	0
23828662	18716457	24487612	1	1		0	1	0	0	1
32821168	18716457	24487612	1	1		0	1	0	0	1
32431454	62773534	48543411	1	0	0	1	1	0			0	1
32431454	62773534	48543411	1	1		1	1	0	0	0	0
67487413	62773534	48543411	1	1		0	1	1	1	0
67487413	62773534	48543411	1		1	0	1	1	1	0	0	0
55744617	86346233	13446417	1	0	0	1	0	1
55744617	86346233	13446417	1		1	1	0	1	0	0	0	1
62344466	86346233	13446417	1	0	0	1	0	0			0	1
88721818	86346233	13446417	1		1	0	0	1	0	0	0	0
86654438	12773521	13446417	1	1		0	1	0	1	0
13127655	72484124	13446417	1		1	0	0	1	0	1
35282858	34465731	66445717	0	0	0	1	0	0			0	0
24456354	55885543	66445717	0	0	0	1	0	0
57327561	63346448	66445717	0	1		0	1	0	0	0	0	1
34686287	14561152	66445717	0	0	0	1	0	0			0	0
86127351	78775152	38861786	1	0	0	1	1	1			1	1
86127351	78775152	38861786	1	1		1	1	1	0	0	0	0
86127351	78775152	38861786	1		1	1	1	1	0	0	0	0
58137654	78775152	38861786	1	0	0	1	1	1			0	1
58137654	78775152	38861786	1	1		1	1	1	0	0	0	1
58137654	78775152	38861786	1		1	1	1	1	0	0	0	1
41186578	78631447	38861786	1		1	0	0	1	0	0	0	1
38717757	15442666	17641477	1	0	0	1	1	1			0	1
38717757	15442666	17641477	1	1		1	1	1	0	0	0	1
38717757	15442666	17641477	1		1	1	1	1	0	0	0	1
51888543	15442666	17641477	1	0	0	1	0	1
51888543	15442666	17641477	1		1	1	0	1	0	0	0	1
78488321	15442666	17641477	1		1	0	0	1	0	0	0	1
17848182	57834715	17641477	1	0	0	1	1	1			0	1
17848182	57834715	17641477	1	1		1	1	1	0	0	0
17848182	57834715	17641477	1		1	1	1	1	0	0	0	0
31466316	25421778	17641477	1	0	0	1	1	1			0	1
31466316	25421778	17641477	1	1		1	1	1	0	0	0	1
31466316	25421778	17641477	1		1	1	1	1	0	0	0	1
56143326	26817827	42224732	1	0	0	1	1	1
56143326	26817827	42224732	1	1		1	1	1	0	0	0	1
56143326	26817827	42224732	1		1	1	1	1	0	0	0	1
22738153	26817827	42224732	1	0	0	1	1	1
22738153	26817827	42224732	1	1		1	1	1	0	0	0	1
22738153	26817827	42224732	1		1	1	1	1	0	0	0	1
62686881	35128854	42224732	1		1	0	0	1	0	0	0	0
11832324	35128854	42224732	1	1		0	1	0	0	0	0	1
22238151	15656826	42224732	1	0	0	1	0	0
83374517	18117135	26261155	1	1		0	1	1	0	0	0	1
83374517	18117135	26261155	1		1	0	1	1	0	0	0	0
46687281	18117135	26261155	1	1		0	1	1	0	1	0	1
46687281	18117135	26261155	1		1	0	1	1	0	1	0	1
61478176	81182513	26261155	1		1	0	0	1	1	0	0	0
38776527	68618664	51811685	1		1	0	0	1	0	0	0
26612174	57813326	51811685	1	0	0	1	0	0			0	0
74462832	18733421	51811685	1	0	0	1	0	0			0	1
66738747	43743327	51811685	1	0	0	1	0	0			0	1
63517615	64836887	51811685	1	0	0	1	0	0			0	0
73731666	43243881	51811685	1	0	0	1	0	0			0	1
73334614	66215734	41316315	1	0	0	1	1	0			0	1
73334614	66215734	41316315	1	1		1	1	0	0	0	0	1
61235215	61383572	14722554	1	0	0	1	0	0			0	0
77261731	24727836	21238478	1	0	0	1	1	1			0	1
77261731	24727836	21238478	1	1		1	1	1	0	0	0	1
77261731	24727836	21238478	1		1	1	1	1	0	0	0
64374864	13458788	21238478	1	0	0	1	1	1			0	1
64374864	13458788	21238478	1	1		1	1	1	0	0	0
64374864	13458788	21238478	1		1	1	1	1	0	0	0
62744566	82437448	83368532	1	0	0	1	1	1			0	1
62744566	82437448	83368532	1	1		1	1	1	0	0	0	0
62744566	82437448	83368532	1		1	1	1	1	0	0	0	1
82375587	82437448	83368532	1		1	0	0	1	1	0	0
72871461	41721553	53416683	1	0	0	1	1	1			0
72871461	41721553	53416683	1	1		1	1	1	0	0	0
72871461	41721553	53416683	1		1	1	1	1	0	0	0	1
51588513	41721553	53416683	1	0	0	1	0	0			0	1
15117674	65346234	53416683	1	0	0	1	1	1			0	1
15117674	65346234	53416683	1	1		1	1	1	0	0	0	1
15117674	65346234	53416683	1		1	1	1	1	0	0	0
62111434	62837175	53416683	1	0	0	1	0	0			0	0
44652711	26647887	83786263	1	1		0	1	1	1	0	0	0
44652711	26647887	83786263	1		1	0	1	1	1	0	0
73453773	41453534	83786263	1	0	0	1	0	0			0	1
65258155	47447156	56885343	1	1		0	1	0	0	0	0	0
68414174	77386225	13656132	1	0	0	1	0	0
58745815	32656184	13656132	1	1		0	1	1	1	0	0	1
58745815	32656184	13656132	1		1	0	1	1	1	0	0
67686686	14155648	42684673	1	1		0	1	1	1	0	0	0
67686686	14155648	42684673	1		1	0	1	1	1	0	0	0
87365868	73327438	61268738	1	1		0	1	1	1	0	0	0
87365868	73327438	61268738	1		1	0	1	1	1	0	0
87716376	16677874	11821782	1	1		0	1	0	1	0	0	1
38753423	61467352	11821782	1	0	0	1	1	1			0	0
38753423	61467352	11821782	1	1		1	1	1	0	0	0	0
38753423	61467352	11821782	1		1	1	1	1	0	0	0
34885772	61467352	11821782	1		1	0	0	1	1	0	0
44588864	27836882	11821782	1	0	0	1	0	0			0	0
56333821	86217365	11821782	1	0	0	1	1	1			0	0
56333821	86217365	11821782	1	1		1	1	1	0	0	0
56333821	86217365	11821782	1		1	1	1	1	0	0	0
24832577	86217365	11821782	1		1	0	0	1	1	0	0	0
53835226	56455353	37677628	1	0	0	1	0	0			0	0
11657418	72321812	37677628	1		1	0	0	1	1	0	0	0
67654118	42738726	37677628	1		1	0	0	1	0	1	0	0
77843524	26777654	25545882	1	0	0	1	1	1			0	1
77843524	26777654	25545882	1	1		1	1	1	0	0	0	1
77843524	26777654	25545882	1		1	1	1	1	0	0	0
46187181	68643117	25545882	1	0	0	1	1	1			0	0
46187181	68643117	25545882	1	1		1	1	1	0	0	0	0
46187181	68643117	25545882	1		1	1	1	1	0	0	0	1
86533831	68643117	25545882	1		1	0	0	1	1	0	0	0
32856281	53585538	25545882	1	0	0	1	1	1			0	0
32856281	53585538	25545882	1	1		1	1	1	0	0	0	1
32856281	53585538	25545882	1		1	1	1	1	0	0	0
73415613	51387274	73583638	1	1		0	1	1	1	0	0	1
73415613	51387274	73583638	1		1	0	1	1	1	0	0
51178574	32355376	73583638	1	0	0	1	0	0			0	0
45475115	53732872	73583638	1	0	0	1	0	0			0
54242153	53732872	73583638	1	0	0	1	0	0			0	1
81671212	15531555	73583638	1	0	0	1	0	0			0	0
74858271	38844171	45877134	1		1	0	0	1	0	0	0
43373548	73316757	36553222	1	0	0	1	1	1			0	1
43373548	73316757	36553222	1	1		1	1	1	0	0	0	1
43373548	73316757	36553222	1		1	1	1	1	0	0	0	1
57321655	73316757	36553222	1	1		0	1	1	1	0	0	0
57321655	73316757	36553222	1		1	0	1	1	1	0	0	0
51531133	73316757	36553222	1	1		0	1	1	1	0	0	0
51531133	73316757	36553222	1		1	0	1	1	1	0	0	0
58177765	23234183	53316458	1	0	0	1	1	1			0	1
58177765	23234183	53316458	1	1		1	1	1	0	0	0	0
58177765	23234183	53316458	1		1	1	1	1	0	0	0	0
56177626	48123217	68587225	1	0	0	1	0	0			0	1
24184184	63143221	56238828	1	0	0	1	1	0			0
24184184	63143221	56238828	1	1		1	1	0	0	0
56371248	22617748	56238828	1	0	0	1	1	1			0	0
56371248	22617748	56238828	1	1		1	1	1	0	0	0	1
56371248	22617748	56238828	1		1	1	1	1	0	0
64735777	16216884	56238828	1	0	0	1	1	0			0	0
64735777	16216884	56238828	1	1		1	1	0	0	0	0	0
36135838	25753426	28851522	1	0	0	1	0	0
26142578	25753426	28851522	1		1	0	0	1	0	0	0
46862568	45557442	28851522	1	0	0	1	0	0
48154278	38354752	84317766	1	0	0	1	1	0
48154278	38354752	84317766	1	1		1	1	0	0	0	0	0
24553143	38354752	84317766	1	0	0	1	0	0			0	0
53631517	38354752	84317766	1	1		0	1	1	1	0	0
53631517	38354752	84317766	1		1	0	1	1	1	0	0	0
34477231	24628633	84317766	1	0	0	1	1	1			0	1
34477231	24628633	84317766	1	1		1	1	1	0	0	0	1
34477231	24628633	84317766	1		1	1	1	1	0	0	0
21874787	65761476	28838334	1	0	0	1	1	0			0	0
21874787	65761476	28838334	1	1		1	1	0	0	0	0	1
44766124	65761476	28838334	1	0	0	1	1	0			0	1
44766124	65761476	28838334	1	1		1	1	0	0	0	0	1
16421367	26715654	28838334	1	1		0	1	0	0	1	0	0
23213381	26715654	28838334	1	1		0	1	0	0	1	0	0
83675166	14418154	27688558	1	0	0	1	0	0			0	1
58633763	14418154	27688558	1	1		0	1	1	1	0	0	0
58633763	14418154	27688558	1		1	0	1	1	1	0	0	0
14321887	68552421	44772672	1		1	0	0	1	0	0	0	1
67145155	68552421	44772672	1	1		0	1	0	0	0	0	1
55565784	75657472	11674181	1	0	0	1	1	1			0	0
55565784	75657472	11674181	1	1		1	1	1	0	0	0	0
55565784	75657472	11674181	1		1	1	1	1	0	0
81228355	75657472	11674181	1	0	0	1	1	1			0	0
81228355	75657472	11674181	1	1		1	1	1	0	0	0
81228355	75657472	11674181	1		1	1	1	1	0	0
18314713	46558574	45875471	1	0	0	1	1	0
18314713	46558574	45875471	1	1		1	1	0	0	0	0	1
72555431	46558574	45875471	1	1		0	1	0	0	0	0	0
12517743	45126637	45875471	1	0	0	1	1	0			0	1
12517743	45126637	45875471	1	1		1	1	0	0	0	0	1
64441217	67164445	44581335	1		1	0	0	1	1	0	0
26267537	35372454	38617242	1	0	0	1	1	0			0	1
26267537	35372454	38617242	1	1		1	1	0	0	0
53361826	35372454	38617242	1	1		0	1	0	1	0
85272115	72774375	38365111	1	0	0	1	1	1
85272115	72774375	38365111	1	1		1	1	1	0	0	0	0
85272115	72774375	38365111	1		1	1	1	1	0	0	0	0
55646364	33814612	52315524	1	1		0	1	0	0	1	0	1
14873585	55322477	85674257	1	0	0	1	1	1			0	0
14873585	55322477	85674257	1	1		1	1	1	0	0	0	1
14873585	55322477	85674257	1		1	1	1	1	0	0	0	1
38631826	55322477	85674257	1	0	0	1	1	1			0	1
38631826	55322477	85674257	1	1		1	1	1	0	0	0	1
38631826	55322477	85674257	1		1	1	1	1	0	0	0	1
25822321	55322477	85674257	1	0	0	1	1	1			0	1
25822321	55322477	85674257	1	1		1	1	1	0	0	0	1
25822321	55322477	85674257	1		1	1	1	1	0	0	0
63387244	55322477	85674257	1	0	0	1	1	1			0	1
63387244	55322477	85674257	1	1		1	1	1	0	0	0	0
63387244	55322477	85674257	1		1	1	1	1	0	0	0	1
87725423	55248737	85674257	1	0	0	1	1	0			0	1
87725423	55248737	85674257	1	1		1	1	0	0	0	0	1
55628134	55248737	85674257	1		1	0	0	1	1	0	0
47478228	55248737	85674257	1		1	0	0	1	0	1	0
25512243	66212257	23141562	1	0	0	1	0	0			0	0
73366468	66212257	23141562	1	0	0	1	0	0			0	1
65244517	27226664	62741848	1	0	0	1	1	1			0	0
65244517	27226664	62741848	1	1		1	1	1	0	0	0	0
65244517	27226664	62741848	1		1	1	1	1	0	0	0	1
82767844	78564643	62741848	1		1	0	0	1	0	0	0
16775784	78564643	62741848	1	1		0	1	0	0	0	0	0
66125234	68874331	82544473	1	0	0	1	1	1			0
66125234	68874331	82544473	1	1		1	1	1	0	0	0	0
66125234	68874331	82544473	1		1	1	1	1	0	0	0	0
22263875	64271863	82544473	1	1		0	1	1	1	0	0	0
22263875	64271863	82544473	1		1	0	1	1	1	0	0	0
38467117	22627741	74682475	1	0	0	1	1	1			0	1
38467117	22627741	74682475	1	1		1	1	1	0	0	0
38467117	22627741	74682475	1		1	1	1	1	0	0	0	1
54552177	22627741	74682475	1		1	0	0	1	1	0	0	0
28673412	33523314	74682475	1	0	0	1	0	0			0	1
86328644	85354786	16855476	1	0	0	1	1	1			0
86328644	85354786	16855476	1	1		1	1	1	0	0	0
86328644	85354786	16855476	1		1	1	1	1	0	0	1	1
12343831	33631254	13157561	1	0	0	1	1	1			0	0
12343831	33631254	13157561	1	1		1	1	1	0	0	0	1
12343831	33631254	13157561	1		1	1	1	1	0	0	0	0
53612248	33631254	13157561	1	0	0	1	1	1			0	1
53612248	33631254	13157561	1	1		1	1	1	0	0	0
53612248	33631254	13157561	1		1	1	1	1	0	0	0	1
41242612	43842434	23583742	1	0	0	1	0	0
28282377	17757178	35683882	1	0	0	1	1	1			0	1
28282377	17757178	35683882	1	1		1	1	1	0	0	0	1
28282377	17757178	35683882	1		1	1	1	1	0	0	0	1
27863115	53416736	35683882	1	0	0	1	1	1			0	0
27863115	53416736	35683882	1	1		1	1	1	0	0	0	1
27863115	53416736	35683882	1		1	1	1	1	0	0	0
22684585	37318836	35683882	1	0	0	1	0	1			0	0
22684585	37318836	35683882	1		1	1	0	1	0	0	0
62543375	37318836	35683882	1	0	0	1	1	1			0	1
62543375	37318836	35683882	1	1		1	1	1	0	0	0	0
62543375	37318836	35683882	1		1	1	1	1	0	0
81113231	32325267	35683882	1	1		0	1	1	0	1	0	1
81113231	32325267	35683882	1		1	0	1	1	0	1	0	1
33434386	24738542	23856823	1	0	0	1	1	1			0
33434386	24738542	23856823	1	1		1	1	1	0	0	0
33434386	24738542	23856823	1		1	1	1	1	0	0	0
11725425	44672668	13815157	1	0	0	1	0	0			0	0
17678626	36334334	83477732	1	0	0	1	1	1			0	1
17678626	36334334	83477732	1	1		1	1	1	0	0
17678626	36334334	83477732	1		1	1	1	1	0	0	0
38624876	65265372	21737448	1		1	0	0	1	1	0	0
17435477	53635665	75358484	1	0	0	1	0	0			0	1
51884444	85874536	75358484	1	0	0	1	1	1			0
51884444	85874536	75358484	1	1		1	1	1	0	0	0	0
51884444	85874536	75358484	1		1	1	1	1	0	0
62473211	54488641	75358484	1	0	0	1	0	0
21758413	54488641	75358484	1	1		0	1	0	1	0
37463443	81262436	58863227	1	0	0	1	1	0			0	1
37463443	81262436	58863227	1	1		1	1	0	0	0	0	1
45433672	81262436	58863227	1	1		0	1	0	1	0	0
13546816	81262436	58863227	1	1		0	1	0	1	0
88748322	81262436	58863227	1	1		0	1	0	0	0	0	0
64221222	88827815	52564833	1	0	0	1	0	0			0	1
85587654	33861178	52564833	1	0	0	1	0	0
12627453	17632861	65743656	1	0	0	1	1	1
12627453	17632861	65743656	1	1		1	1	1	0	0	0	1
12627453	17632861	65743656	1		1	1	1	1	0	0	0	1
55536824	17632861	65743656	1	0	0	1	1	0			0	1
55536824	17632861	65743656	1	1		1	1	0	0	0	0	1
58153512	12614124	65743656	1	0	0	1	1	0			0
58153512	12614124	65743656	1	1		1	1	0	0	0
54848268	12614124	65743656	1	0	0	1	1	1
54848268	12614124	65743656	1	1		1	1	1	0	0	0	1
54848268	12614124	65743656	1		1	1	1	1	0	0	0	1
27423738	12614124	65743656	1	1		0	1	1	0	1	0
27423738	12614124	65743656	1		1	0	1	1	0	1	0
42876843	62565214	63113684	1	0	0	1	1	0			0	0
42876843	62565214	63113684	1	1		1	1	0	0	0	0
42843863	62565214	63113684	1	1		0	1	1	1	0	1	0
42843863	62565214	63113684	1		1	0	1	1	1	0	0
67162675	62565214	63113684	1	1		0	1	0	1	0	0	0
62166827	14228552	63113684	1	0	0	1	1	1			0	0
62166827	14228552	63113684	1	1		1	1	1	0	0	0
62166827	14228552	63113684	1		1	1	1	1	0	0	0
64588853	14228552	63113684	1		1	0	0	1	1	0	0	0
15536763	53578472	63113684	1		1	0	0	1	0	0	0
48755826	67832125	33718116	1	0	0	1	1	1			0	0
48755826	67832125	33718116	1	1		1	1	1	0	0	0	0
48755826	67832125	33718116	1		1	1	1	1	0	0	0
47831586	67832125	33718116	1	0	0	1	1	1			0	0
47831586	67832125	33718116	1	1		1	1	1	0	0	0	0
47831586	67832125	33718116	1		1	1	1	1	0	0	0	1
48282865	67832125	33718116	1		1	0	0	1	0	0	0
41616557	58388786	62227141	1	0	0	1	1	1			0	0
41616557	58388786	62227141	1	1		1	1	1	0	0	0
41616557	58388786	62227141	1		1	1	1	1	0	0	0
64645348	58388786	62227141	1		1	0	0	1	1	0	0	1
66777682	58521745	77412563	1	0	0	1	1	0			0	0
66777682	58521745	77412563	1	1		1	1	0	0	0	0
42317457	64651375	47837123	1	0	0	1	1	1			0	0
42317457	64651375	47837123	1	1		1	1	1	0	0	0	1
42317457	64651375	47837123	1		1	1	1	1	0	0	0
58375328	43431672	47837123	1	0	0	1	1	1			0
58375328	43431672	47837123	1	1		1	1	1	0	0	0	1
58375328	43431672	47837123	1		1	1	1	1	0	0	0
66166261	43431672	47837123	1	0	0	1	1	1			0	0
66166261	43431672	47837123	1	1		1	1	1	0	0	0
66166261	43431672	47837123	1		1	1	1	1	0	0	0
82517342	47431653	47837123	1	0	0	1	1	1			0	1
82517342	47431653	47837123	1	1		1	1	1	0	0	0	1
82517342	47431653	47837123	1		1	1	1	1	0	0	0
42472461	57273185	47837123	1	0	0	1	1	1			0	0
42472461	57273185	47837123	1	1		1	1	1	0	0	0
42472461	57273185	47837123	1		1	1	1	1	0	0	0
67351117	25353717	47837123	1	1		0	1	0	0	1	0
27728876	57177817	87625514	1	0	0	1	1	0			0	1
27728876	57177817	87625514	1	1		1	1	0	0	0
46386784	52716773	53457848	1	0	0	1	1	1
46386784	52716773	53457848	1	1		1	1	1	0	0	0	0
46386784	52716773	53457848	1		1	1	1	1	0	0	0	0
21637786	52716773	53457848	1	1		0	1	1	0	0	0	0
21637786	52716773	53457848	1		1	0	1	1	0	0	0	0
17673515	73478654	53457848	1	0	0	1	1	1			0	0
17673515	73478654	53457848	1	1		1	1	1	0	0	0	1
17673515	73478654	53457848	1		1	1	1	1	0	0	0	0
11445583	24215757	21617251	1	0	0	1	0	0			0	0
28738123	24215757	21617251	1	1		0	1	1	1	0	0
28738123	24215757	21617251	1		1	0	1	1	1	0	0
61517317	53872637	21617251	1	0	0	1	1	1			0	0
61517317	53872637	21617251	1	1		1	1	1	0	0	0
61517317	53872637	21617251	1		1	1	1	1	0	0	0	0
41458188	86441728	13672384	1	0	0	1	1	1			0	0
41458188	86441728	13672384	1	1		1	1	1	0	0	0
41458188	86441728	13672384	1		1	1	1	1	0	0	0	0
85266651	86441728	13672384	1		1	0	0	1	0	0	0	0
55128242	16813832	13672384	1	0	0	1	0	0			0	1
14557873	23477334	13672384	1	0	0	1	1	1			0	0
14557873	23477334	13672384	1	1		1	1	1	0	0	0	0
14557873	23477334	13672384	1		1	1	1	1	0	0	0	0
54183858	17758463	68582274	1	0	0	1	0	0
55567684	34232883	72337633	1	0	0	1	1	1			0	1
55567684	34232883	72337633	1	1		1	1	1	0	0	0	1
55567684	34232883	72337633	1		1	1	1	1	0	0	0	0
11218633	34232883	72337633	1	0	0	1	1	1			0
11218633	34232883	72337633	1	1		1	1	1	0	0	1
11218633	34232883	72337633	1		1	1	1	1	0	0	0	1
87422344	34232883	72337633	1	0	0	1	1	1			0
87422344	34232883	72337633	1	1		1	1	1	0	0	1
87422344	34232883	72337633	1		1	1	1	1	0	0	0	1
34648233	34232883	72337633	1		1	0	0	1	0	1	0
21411365	54524213	38714365	1	1		0	1	0	1	0	0
45142816	54524213	38714365	1	1		0	1	0	1	0	0	0
88345516	13522735	38714365	1	1		0	1	1	1	0	0	1
88345516	13522735	38714365	1		1	0	1	1	1	0	0	0
23676445	13522735	38714365	1		1	0	0	1	0	0	0	0
71322473	52421731	51718775	1	1		0	1	1	0	1	0
71322473	52421731	51718775	1		1	0	1	1	0	1	0	0
14316136	44334817	51718775	1	0	0	1	1	0			0	0
14316136	44334817	51718775	1	1		1	1	0	0	0	0
53354741	44334817	51718775	1	0	0	1	1	0
53354741	44334817	51718775	1	1		1	1	0	0	0
51475718	56536844	86211741	1	0	0	1	1	0			0	0
51475718	56536844	86211741	1	1		1	1	0	0	0	0	1
57243251	13833215	86211741	1	0	0	1	1	1			0	0
57243251	13833215	86211741	1	1		1	1	1	0	0	0	1
57243251	13833215	86211741	1		1	1	1	1	0	0	1	1
38151438	13833215	86211741	1	0	0	1	1	1
38151438	13833215	86211741	1	1		1	1	1	0	0	0	1
38151438	13833215	86211741	1		1	1	1	1	0	0	0	0
25524236	13833215	86211741	1	0	0	1	0	1			0	1
25524236	13833215	86211741	1		1	1	0	1	0	0	1	1
62438386	13833215	86211741	1	0	0	1	0	0			0	1
84757664	42781318	65176636	1	1		0	1	1	1	0	0
84757664	42781318	65176636	1		1	0	1	1	1	0	0	0
54888188	66671588	65176636	1	0	0	1	1	0			0	1
54888188	66671588	65176636	1	1		1	1	0	0	0	0
26482321	68847157	65176636	1		1	0	0	1	0	0	0
46665822	76175762	52128546	1	0	0	1	1	1			0	0
46665822	76175762	52128546	1	1		1	1	1	0	0	0
46665822	76175762	52128546	1		1	1	1	1	0	0	0
75172447	13858252	11146635	1	0	0	1	1	1			0	1
75172447	13858252	11146635	1	1		1	1	1	0	0	0
75172447	13858252	11146635	1		1	1	1	1	0	0	0	1
52555588	31146122	11146635	1	1		0	1	1	1	0	0
52555588	31146122	11146635	1		1	0	1	1	1	0	0	0
23254767	62436651	48456666	1		1	0	0	1	0	0	0
11175157	77286818	34446154	1	0	0	1	0	0			0	0
64621182	33278756	14845885	1	0	0	1	1	1			0	0
64621182	33278756	14845885	1	1		1	1	1	0	0	0	0
64621182	33278756	14845885	1		1	1	1	1	0	0	0	0
17357234	14464551	83127512	1	0	0	1	1	1			0	1
17357234	14464551	83127512	1	1		1	1	1	0	0	0
17357234	14464551	83127512	1		1	1	1	1	0	0	0	0
42426666	22786377	83127512	1	0	0	1	1	1			0	0
42426666	22786377	83127512	1	1		1	1	1	0	0	0
42426666	22786377	83127512	1		1	1	1	1	0	0	0	0
13856146	22786377	83127512	1		1	0	0	1	1	0	0	1
33822635	32558621	83127512	1		1	0	0	1	0	0	0	0
46172876	84871156	54313161	1	1		0	1	1	0	1	0
46172876	84871156	54313161	1		1	0	1	1	0	1	0	0
61253574	84871156	54313161	1	1		0	1	1	0	1	0
61253574	84871156	54313161	1		1	0	1	1	0	1	0	0
45346666	66423818	57128564	1	0	0	1	0	0			0	1
48281731	16466642	61613887	1		1	0	0	1	0	0	0
85684278	56764743	18663646	1	0	0	1	0	0			0	0
78716122	52634832	11778728	1	0	0	1	0	0			0	0
47353165	52634832	11778728	1	1		0	1	1	1	0
47353165	52634832	11778728	1		1	0	1	1	1	0	0	0
86577127	32585535	88366471	1		1	0	0	1	1	0	0	0
35415573	18266172	57811485	1	0	0	1	1	0			0	0
35415573	18266172	57811485	1	1		1	1	0	0	0	0	1
34361275	18266172	57811485	1	0	0	1	1	1			0	0
34361275	18266172	57811485	1	1		1	1	1	0	0	0	1
34361275	18266172	57811485	1		1	1	1	1	0	0	0	1
68631628	56262178	64688881	1	0	0	1	1	1			0	0
68631628	56262178	64688881	1	1		1	1	1	0	0	0	1
68631628	56262178	64688881	1		1	1	1	1	0	0	0	0
75565245	55587853	58444314	1	0	0	1	0	0			0	0
77687431	55587853	58444314	1	0	0	1	0	0
66348523	58866751	58444314	1	0	0	1	0	0
27411154	58866751	58444314	1	0	0	1	0	0
11828647	51111165	86116266	1	0	0	1	1	0
11828647	51111165	86116266	1	1		1	1	0	0	0
74247112	51111165	86116266	1	1		0	1	1	1	0	0
74247112	51111165	86116266	1		1	0	1	1	1	0	0
34784281	66855747	86116266	1		1	0	0	1	1	0
58322717	86224833	86116266	1		1	0	0	1	0	1	0	0
32373643	86224833	86116266	1		1	0	0	1	0	1
55785582	72438765	34226533	0	1		0	1	1	0	0		0
55785582	72438765	34226533	0		1	0	1	1	0	0	0
32835264	72438765	34226533	0		1	0	0	1	0	0	0	1
26243858	26478611	34226533	0	0	0	1	0	0
45811717	26478611	34226533	0	0	0	1	0	0
77283237	68317413	34226533	0		1	0	0	1	0	0	0
55268127	53262881	43841811	1	1		0	1	1	1	0	0
55268127	53262881	43841811	1		1	0	1	1	1	0	0	0
82382627	47648151	43841811	1	1		0	1	1	1	0	0
82382627	47648151	43841811	1		1	0	1	1	1	0	0	0
54768165	56518237	43841811	1	1		0	1	1	1	0	0
54768165	56518237	43841811	1		1	0	1	1	1	0	0	0
23353174	85376413	45146463	1	0	0	1	1	1
23353174	85376413	45146463	1	1		1	1	1	0	0	0	0
23353174	85376413	45146463	1		1	1	1	1	0	0	0
25544738	85376413	45146463	1		1	0	0	1	1	0	0	0
58854266	34446812	58513242	1	0	0	1	1	1			0	1
58854266	34446812	58513242	1	1		1	1	1	0	0	1	1
58854266	34446812	58513242	1		1	1	1	1	0	0	0
71231487	34446812	58513242	1	0	0	1	1	1			0	1
71231487	34446812	58513242	1	1		1	1	1	0	0	0	1
71231487	34446812	58513242	1		1	1	1	1	0	0	1
65655855	88267322	58513242	1	0	0	1	1	1			1	1
65655855	88267322	58513242	1	1		1	1	1	0	0	0	1
65655855	88267322	58513242	1		1	1	1	1	0	0
21883358	88267322	58513242	1	1		0	1	1	1	0	0
21883358	88267322	58513242	1		1	0	1	1	1	0	0
87542556	32325264	82133122	1	0	0	1	0	0
16313744	32325264	82133122	1		1	0	0	1	1	0	0	1
14581277	41154117	82133122	1	0	0	1	1	1			0	0
14581277	41154117	82133122	1	1		1	1	1	0	0	0
14581277	41154117	82133122	1		1	1	1	1	0	0	0
22661868	41154117	82133122	1	0	0	1	0	1
22661868	41154117	82133122	1		1	1	0	1	0	0	0
36315533	75335841	51615317	1	0	0	1	1	1			0	0
36315533	75335841	51615317	1	1		1	1	1	0	0	0
36315533	75335841	51615317	1		1	1	1	1	0	0	0
83353125	38428853	81433262	1		1	0	0	1	0	1	0	0
33241616	78828368	38323872	1	0	0	1	0	0			0	1
66541832	57875228	72214617	1	0	0	1	1	1			0
66541832	57875228	72214617	1	1		1	1	1	0	0	0	0
66541832	57875228	72214617	1		1	1	1	1	0	0	0	0
24524458	77576225	14367882	1	0	0	1	0	0			0	1
76264681	57223637	14367882	1	0	0	1	1	0			0	0
76264681	57223637	14367882	1	1		1	1	0	0	0	1	0
34552544	27476645	14367882	1		1	0	0	1	1	0	0	1
23673134	24617252	26314238	1	0	0	1	1	1			0	1
23673134	24617252	26314238	1	1		1	1	1	0	0	0
23673134	24617252	26314238	1		1	1	1	1	0	0
56135123	24617252	26314238	1	0	0	1	1	1			0	0
56135123	24617252	26314238	1	1		1	1	1	0	0	0
56135123	24617252	26314238	1		1	1	1	1	0	0
41474533	24617252	26314238	1	1		0	1	0	0	1
57167487	24617252	26314238	1		1	0	0	1	1	0	0	0
77745777	41556735	81872478	1	0	0	1	1	1			0	0
77745777	41556735	81872478	1	1		1	1	1	0	0	0	0
77745777	41556735	81872478	1		1	1	1	1	0	0	0	1
88773678	41556735	81872478	1		1	0	0	1	1	0	0	0
82712571	86771576	81872478	1	0	0	1	1	1			0	0
82712571	86771576	81872478	1	1		1	1	1	0	0	0	0
82712571	86771576	81872478	1		1	1	1	1	0	0	0	0
66852533	32385547	66217333	1	0	0	1	1	0			0	1
66852533	32385547	66217333	1	1		1	1	0	0	0	0
46658434	52546725	66217333	1		1	0	0	1	0	1	0	0
28744731	68684653	66217333	1	0	0	1	1	0			0	0
28744731	68684653	66217333	1	1		1	1	0	0	0	0	0
38764382	58844635	66217333	1		1	0	0	1	1	0	0
64275166	42442324	66217333	1	1		0	1	1	0	1	0	0
64275166	42442324	66217333	1		1	0	1	1	0	1	0	1
73757282	42442324	66217333	1		1	0	0	1	1	0	0
24137673	87645278	66217333	1	1		0	1	1	1	0	0	0
24137673	87645278	66217333	1		1	0	1	1	1	0	0	0
38816716	51422361	66217333	1	0	0	1	0	0			0	0
11554348	72524771	45415434	1	0	0	1	0	0
82545812	75715815	45415434	1	0	0	1	0	0			0	0
63282827	58238877	44132567	0	0	0	1	1	1			0	1
63282827	58238877	44132567	0	1		1	1	1	0	0	0	1
63282827	58238877	44132567	0		1	1	1	1	0	0	0	1
57371517	58238877	44132567	0		1	0	0	1	1	0	0
18232656	88321133	44132567	0	0	0	1	1	1			0	1
18232656	88321133	44132567	0	1		1	1	1	0	0	0
18232656	88321133	44132567	0		1	1	1	1	0	0	0	1
36286561	37713348	44132567	0	0	0	1	1	1			0	1
36286561	37713348	44132567	0	1		1	1	1	0	0	0
36286561	37713348	44132567	0		1	1	1	1	0	0	0	1
48714622	17316681	44132567	0	0	0	1	1	1			0	1
48714622	17316681	44132567	0	1		1	1	1	0	0	0	1
48714622	17316681	44132567	0		1	1	1	1	0	0	0	1
12613571	41333118	44132567	0	0	0	1	1	1			0	0
12613571	41333118	44132567	0	1		1	1	1	0	0	0	1
12613571	41333118	44132567	0		1	1	1	1	0	0	0	0
77428543	41333118	44132567	0	1		0	1	1	0	1
77428543	41333118	44132567	0		1	0	1	1	0	1	0	0
48236377	37325872	51521281	0		1	0	0	1	0	1
42877564	38752746	51521281	0	0	0	1	1	1			0	0
42877564	38752746	51521281	0	1		1	1	1	0	0	0	0
42877564	38752746	51521281	0		1	1	1	1	0	0	0	0
37532585	38752746	51521281	0	0	0	1	1	1			0	0
37532585	38752746	51521281	0	1		1	1	1	0	0
37532585	38752746	51521281	0		1	1	1	1	0	0
81657827	58343568	51521281	0	0	0	1	1	1			0	0
81657827	58343568	51521281	0	1		1	1	1	0	0	0	1
81657827	58343568	51521281	0		1	1	1	1	0	0
56378513	23267612	51521281	0		1	0	0	1	0	0	0	0
21384418	24487157	76265472	0	0	0	1	1	1			0	1
21384418	24487157	76265472	0	1		1	1	1	0	0	0	1
21384418	24487157	76265472	0		1	1	1	1	0	0	1	1
43142875	24487157	76265472	0	0	0	1	1	1			0	1
43142875	24487157	76265472	0	1		1	1	1	0	0	0	1
43142875	24487157	76265472	0		1	1	1	1	0	0	0	1
62173314	24487157	76265472	0	0	0	1	1	1			0	1
62173314	24487157	76265472	0	1		1	1	1	0	0	0
62173314	24487157	76265472	0		1	1	1	1	0	0	0
52875176	34365632	76265472	0	0	0	1	0	0			0	0
23773144	33133572	47348578	0	0	0	1	0	0			0	1
57865557	33133572	47348578	0	0	0	1	1	1			0	1
57865557	33133572	47348578	0	1		1	1	1	0	0	0	1
57865557	33133572	47348578	0		1	1	1	1	0	0	0	1
21818846	24733581	47348578	0		1	0	0	1	0	1	0	0
34157636	51435624	47348578	0	0	0	1	1	0			0	0
34157636	51435624	47348578	0	1		1	1	0	0	0	0
16736811	51435624	47348578	0	0	0	1	1	0				0
16736811	51435624	47348578	0	1		1	1	0	0	0	0	1
23352363	51435624	47348578	0	1		0	1	0	0	1	0	0
55115754	51435624	47348578	0	1		0	1	0	0	1	0	0
48157574	85761621	36423468	0	0	0	1	1	0			0	0
48157574	85761621	36423468	0	1		1	1	0	0	0	0	1
81812335	11852762	15428456	0		1	0	0	1	0	0	0
63615836	63627768	15428456	0	0	0	1	1	1
63615836	63627768	15428456	0	1		1	1	1	0	0	0
63615836	63627768	15428456	0		1	1	1	1	0	0	0	1
26546474	63576382	15428456	0	0	0	1	1	1
26546474	63576382	15428456	0	1		1	1	1	0	0	0	1
26546474	63576382	15428456	0		1	1	1	1	0	0	0
78111176	87774653	15428456	0	0	0	1	1	1
78111176	87774653	15428456	0	1		1	1	1	0	0
78111176	87774653	15428456	0		1	1	1	1	0	0	0
58832584	87774653	15428456	0	1		0	1	1	1	0
58832584	87774653	15428456	0		1	0	1	1	1	0	0	1
36613661	82121681	23487665	0	0	0	1	1	0			0	1
36613661	82121681	23487665	0	1		1	1	0	0	0	0	1
37564281	82121681	23487665	0	0	0	1	1	1			0	1
37564281	82121681	23487665	0	1		1	1	1	0	0	0
37564281	82121681	23487665	0		1	1	1	1	0	0	0
82614658	82121681	23487665	0	0	0	1	0	0			0	0
52556773	32362152	23487665	0		1	0	0	1	0	0	0	0
21531277	13648664	42658584	0	0	0	1	1	0
21531277	13648664	42658584	0	1		1	1	0	0	0	0	1
75658713	13648664	42658584	0	0	0	1	1	0
75658713	13648664	42658584	0	1		1	1	0	0	0	0	1
33674418	37651835	42658584	0	0	0	1	0	1			0	0
33674418	37651835	42658584	0		1	1	0	1	0	0	0	1
63361164	75234256	61572288	0	0	0	1	1	1			0	1
63361164	75234256	61572288	0	1		1	1	1	0	0	0	0
63361164	75234256	61572288	0		1	1	1	1	0	0	0	1
18258553	13481332	34855421	0	0	0	1	0	0
14627542	85335167	34855421	0	0	0	1	1	1			0	0
14627542	85335167	34855421	0	1		1	1	1	0	0	0	1
14627542	85335167	34855421	0		1	1	1	1	0	0
36363383	85335167	34855421	0	1		0	1	1	1	0	0
36363383	85335167	34855421	0		1	0	1	1	1	0	0	0
17875645	58614147	34855421	0		1	0	0	1	0	1	1	1
65542267	48556582	34855421	0		1	0	0	1	0	1	0	1
44138546	76621772	58467264	0	1		0	1	0	0	0	0	1
23676517	65536185	58467264	0	0	0	1	0	0			0	1
36583627	78613584	36121833	0	0	0	1	1	1
36583627	78613584	36121833	0	1		1	1	1	0	0	0	1
36583627	78613584	36121833	0		1	1	1	1	0	0	0	1
43228676	33113646	85258214	0	0	0	1	1	1			0	0
43228676	33113646	85258214	0	1		1	1	1	0	0	0	1
43228676	33113646	85258214	0		1	1	1	1	0	0	0	1
71863475	47262588	85258214	0	1		0	1	0	0	1	0	1
27725275	21455421	73855752	0	0	0	1	0	0			0	0
13346568	37743812	73855752	0	0	0	1	0	0			0	1
66183827	12515524	21555838	0		1	0	0	1	1	0	0	0
66476316	12515524	21555838	0		1	0	0	1	0	1	0	0
87172152	47113157	56226425	0	0	0	1	1	0
87172152	47113157	56226425	0	1		1	1	0	0	0
27211344	72313286	56226425	0	1		0	1	1	1	0
27211344	72313286	56226425	0		1	0	1	1	1	0	0
76227843	67232427	84328437	0	0	0	1	1	0			0	1
76227843	67232427	84328437	0	1		1	1	0	0	0	0	1
68521158	67232427	84328437	0		1	0	0	1	1	0	0	0
85381583	46355348	84328437	0	0	0	1	1	0				0
85381583	46355348	84328437	0	1		1	1	0	0	0	0
25252546	46355348	84328437	0	0	0	1	1	0			0	1
25252546	46355348	84328437	0	1		1	1	0	0	0	0	1
63582155	76461167	62216325	0	0	0	1	0	0			0	0
66612178	58362551	67743124	0	0	0	1	1	1			0	0
66612178	58362551	67743124	0	1		1	1	1	0	0	0	1
66612178	58362551	67743124	0		1	1	1	1	0	0	0	1
63885644	58362551	67743124	0	0	0	1	1	1			0	1
63885644	58362551	67743124	0	1		1	1	1	0	0
63885644	58362551	67743124	0		1	1	1	1	0	0	0	1
42747753	58362551	67743124	0	1		0	1	1	1	0	0
42747753	58362551	67743124	0		1	0	1	1	1	0	0	1
43721345	61745435	67743124	0	0	0	1	1	1			0	0
43721345	61745435	67743124	0	1		1	1	1	0	0	0	1
43721345	61745435	67743124	0		1	1	1	1	0	0	0
88865575	68282433	25574127	0		1	0	0	1	1	0	0
55422111	62737188	25574127	0	1		0	1	0	0	0	0
41364322	14861873	25574127	0		1	0	0	1	1	0	0	0
25653837	14861873	25574127	0		1	0	0	1	1	0	0
12343314	32182263	25574127	0		1	0	0	1	0	0	0	1
22541182	81228888	25574127	0		1	0	0	1	0	0	0	0
12167387	44557283	71575662	0		1	0	0	1	1	0	0	0
82346751	77663255	71575662	0	0	0	1	0	0			0	0
35862538	48588231	87547718	0	0	0	1	0	0			0	1
71737671	53882763	68182278	0		1	0	0	1	0	0	0	0
56186222	53882763	68182278	0	1		0	1	0	0	0	0
83265271	18534481	68182278	0	1		0	1	1	1	0	0
83265271	18534481	68182278	0		1	0	1	1	1	0	0
68312483	22438413	31461341	0	0	0	1	1	1				1
68312483	22438413	31461341	0	1		1	1	1	0	0	0	1
68312483	22438413	31461341	0		1	1	1	1	0	0	0	1
86157373	22438413	31461341	0	0	0	1	1	1
86157373	22438413	31461341	0	1		1	1	1	0	0	0
86157373	22438413	31461341	0		1	1	1	1	0	0
24444646	45516788	31461341	0	0	0	1	0	0			0	1
36532151	55465814	47517541	0	0	0	1	0	0
13561356	22328612	45118715	0	0	0	1	0	1			0	1
13561356	22328612	45118715	0		1	1	0	1	0	0	0
73483835	22328612	45118715	0	0	0	1	1	1			0	1
73483835	22328612	45118715	0	1		1	1	1	0	0	0	1
73483835	22328612	45118715	0		1	1	1	1	0	0	0
55771612	22328612	45118715	0	1		0	1	1	1	0	0	0
55771612	22328612	45118715	0		1	0	1	1	1	0	0
61251277	22328612	45118715	0	1		0	1	0	0	0	0
55336441	22328612	45118715	0		1	0	0	1	0	0	0
15513543	67623577	45118715	0	0	0	1	0	0			0	0
54616558	23758466	45118715	0		1	0	0	1	0	1	0	0
64125133	72124678	82565766	1	0	0	1	1	1			0	1
64125133	72124678	82565766	1	1		1	1	1	0	0	0
64125133	72124678	82565766	1		1	1	1	1	0	0	0
26388554	72124678	82565766	1	1		0	1	1	1	0	0	0
26388554	72124678	82565766	1		1	0	1	1	1	0	0	1
67521577	72124678	82565766	1	1		0	1	1	1	0	0
67521577	72124678	82565766	1		1	0	1	1	1	0	0	1
67743848	74428134	82565766	1	0	0	1	0	0			0	1
74858676	38243626	82565766	1	1		0	1	1	1	0	0	0
74858676	38243626	82565766	1		1	0	1	1	1	0	0	1
37628168	41153333	55367657	0	0	0	1	1	1
37628168	41153333	55367657	0	1		1	1	1	0	0	0	0
37628168	41153333	55367657	0		1	1	1	1	0	0	0
11622331	41153333	55367657	0	0	0	1	0	0
61617854	51257265	55367657	0	0	0	1	0	0
41725578	23821526	44723345	0	1		0	1	1	1	0	1	0
41725578	23821526	44723345	0		1	0	1	1	1	0	0	1
27321273	32646431	44723345	0	0	0	1	1	1			0	0
27321273	32646431	44723345	0	1		1	1	1	0	0	0
27321273	32646431	44723345	0		1	1	1	1	0	0	0
61351581	84656435	44723345	0	0	0	1	1	1			1	1
61351581	84656435	44723345	0	1		1	1	1	0	0	0	1
61351581	84656435	44723345	0		1	1	1	1	0	0	0	1
23154612	84656435	44723345	0	1		0	1	1	1	0	0	1
23154612	84656435	44723345	0		1	0	1	1	1	0	0	1
55761117	25576253	44723345	0	0	0	1	1	1			0	1
55761117	25576253	44723345	0	1		1	1	1	0	0	0	1
55761117	25576253	44723345	0		1	1	1	1	0	0	0	1
48485888	17364821	64483672	0	0	0	1	0	0			0	0
88281525	17364821	64483672	0		1	0	0	1	1	0	0
55825287	51858168	64483672	0	0	0	1	1	1			0	0
55825287	51858168	64483672	0	1		1	1	1	0	0	0
55825287	51858168	64483672	0		1	1	1	1	0	0	0	1
34656646	31648286	64483672	0	0	0	1	0	0			0	0
55722711	38452168	27166526	0	1		0	1	1	1	0	0
55722711	38452168	27166526	0		1	0	1	1	1	0	0	1
51553153	36443257	27166526	0	1		0	1	1	1	0
51553153	36443257	27166526	0		1	0	1	1	1	0	0	0
18334368	35578751	27166526	0	0	0	1	1	1			0	1
18334368	35578751	27166526	0	1		1	1	1	0	0	0	0
18334368	35578751	27166526	0		1	1	1	1	0	0	0	0
81176146	85442318	27166526	0		1	0	0	1	1	0	0	0
12776585	85461715	25153483	0	0	0	1	1	1			0	0
12776585	85461715	25153483	0	1		1	1	1	0	0	0
12776585	85461715	25153483	0		1	1	1	1	0	0	0	0
51243421	87268586	25153483	0	1		0	1	1	1	0	0	0
51243421	87268586	25153483	0		1	0	1	1	1	0	0	0
26448843	74346245	25153483	0	0	0	1	1	1			0	1
26448843	74346245	25153483	0	1		1	1	1	0	0	0	0
26448843	74346245	25153483	0		1	1	1	1	0	0	0	0
82787114	74346245	25153483	0		1	0	0	1	1	0	0	0
56263887	74346245	25153483	0		1	0	0	1	1	0	0	0
43612283	15555726	25153483	0	0	0	1	0	0			0	1
26588815	88236271	65618624	0	0	0	1	0	0			1	1
27367242	76854666	65618624	0	0	0	1	0	1			0	1
27367242	76854666	65618624	0		1	1	0	1	0	0	0	1
42623114	53867375	42175284	0	0	0	1	1	1			0	0
42623114	53867375	42175284	0	1		1	1	1	0	0	0
42623114	53867375	42175284	0		1	1	1	1	0	0	0
14573585	21647235	42175284	0		1	0	0	1	1	0	0
76568731	64626528	16454372	0	0	0	1	1	0			0	1
76568731	64626528	16454372	0	1		1	1	0	0	0
65257742	64626528	16454372	0		1	0	0	1	0	1	0	1
46176858	46811727	16454372	0	0	0	1	1	1
46176858	46811727	16454372	0	1		1	1	1	0	0	0	1
46176858	46811727	16454372	0		1	1	1	1	0	0	0
64285712	15866871	16454372	0		1	0	0	1	0	1	0	0
81736467	64771843	77885652	0	1		0	1	1	1	0	0	0
81736467	64771843	77885652	0		1	0	1	1	1	0	0	1
45578574	64631167	77885652	0	0	0	1	0	0
35374867	37815584	77885652	0		1	0	0	1	0	0	0
73333861	22865266	77885652	0		1	0	0	1	0	0	0
22163184	34821286	88172535	0	0	0	1	0	0
67524577	34821286	88172535	0		1	0	0	1	1	0	0	0
46277244	18482663	88172535	0	0	0	1	1	1			0	0
46277244	18482663	88172535	0	1		1	1	1	0	0	0	0
46277244	18482663	88172535	0		1	1	1	1	0	0	0	0
78122738	53734411	34536783	0	0	0	1	1	1			0	0
78122738	53734411	34536783	0	1		1	1	1	0	0	0	1
78122738	53734411	34536783	0		1	1	1	1	0	0	0	1
32778642	53734411	34536783	0	0	0	1	1	1
32778642	53734411	34536783	0	1		1	1	1	0	0	0	1
32778642	53734411	34536783	0		1	1	1	1	0	0	0	0
76688668	53231823	33326332	1	0	0	1	1	1			0	0
76688668	53231823	33326332	1	1		1	1	1	0	0	0	0
76688668	53231823	33326332	1		1	1	1	1	0	0	0
66778216	18457757	17284565	0	0	0	1	1	0			0	1
66778216	18457757	17284565	0	1		1	1	0	0	0	0	1
88541777	18457757	17284565	0		1	0	0	1	1	0	0	0
43488638	18457757	17284565	0		1	0	0	1	1	0	0
67771472	18457757	17284565	0		1	0	0	1	1	0	0	0
31137835	32745743	32878844	0	0	0	1	1	1			0
31137835	32745743	32878844	0	1		1	1	1	0	0	0	1
31137835	32745743	32878844	0		1	1	1	1	0	0	0	1
23818857	32745743	32878844	0	0	0	1	1	1			0	1
23818857	32745743	32878844	0	1		1	1	1	0	0	0	1
23818857	32745743	32878844	0		1	1	1	1	0	0	0	1
38137272	32745743	32878844	0	0	0	1	1	0
38137272	32745743	32878844	0	1		1	1	0	0	0	0	0
57134877	32745743	32878844	0	1		0	1	1	1	0
57134877	32745743	32878844	0		1	0	1	1	1	0	0	1
63211274	61161871	32878844	0	1		0	1	0	1	0	0	1
37143522	15433144	32878844	0	0	0	1	1	1			0	1
37143522	15433144	32878844	0	1		1	1	1	0	0	0	1
37143522	15433144	32878844	0		1	1	1	1	0	0	0	1
68618377	15433144	32878844	0	0	0	1	1	1			0	1
68618377	15433144	32878844	0	1		1	1	1	0	0	0
68618377	15433144	32878844	0		1	1	1	1	0	0	0	1
77775312	53261875	32878844	0		1	0	0	1	0	1	0
61213667	53261875	32878844	0	1		0	1	1	1	0
61213667	53261875	32878844	0		1	0	1	1	1	0
48653385	53261875	32878844	0		1	0	0	1	0	1	0	1
35135287	53261875	32878844	0	1		0	1	1	1	0	0	0
35135287	53261875	32878844	0		1	0	1	1	1	0	0	1
42565714	53261875	32878844	0	1		0	1	0	0	0	0
42437844	53261875	32878844	0		1	0	0	1	1	0	0	0
71176572	45576444	87648634	0	0	0	1	1	1			0	0
71176572	45576444	87648634	0	1		1	1	1	0	0	0	0
71176572	45576444	87648634	0		1	1	1	1	0	0	0	1
12678423	45576444	87648634	0	0	0	1	1	1
12678423	45576444	87648634	0	1		1	1	1	0	0
12678423	45576444	87648634	0		1	1	1	1	0	0	0
72617546	45576444	87648634	0		1	0	0	1	1	0	0	0
23825111	78117631	34334762	0	0	0	1	1	1			0	1
23825111	78117631	34334762	0	1		1	1	1	0	0	0
23825111	78117631	34334762	0		1	1	1	1	0	0	0	1
64273778	33331553	34334762	0	0	0	1	0	0			0	1
13771345	14233275	34334762	0	1		0	1	1	1	0	0	0
13771345	14233275	34334762	0		1	0	1	1	1	0	1	1
48526315	67284842	75426451	0	0	0	1	0	0			0	0
18528244	32148773	75426451	0	0	0	1	0	0			0	0
52638315	32148773	75426451	0	0	0	1	1	1			0	0
52638315	32148773	75426451	0	1		1	1	1	0	0	0
52638315	32148773	75426451	0		1	1	1	1	0	0	0	1
81767534	25416684	75426451	0		1	0	0	1	1	0	0	0
22434164	21712751	38836152	0	0	0	1	1	0
22434164	21712751	38836152	0	1		1	1	0	0	0	0	0
73542187	47681465	28841117	1	0	0	1	1	1			0	0
73542187	47681465	28841117	1	1		1	1	1	0	0	0
73542187	47681465	28841117	1		1	1	1	1	0	0	0
13467368	53831641	28841117	1	0	0	1	1	1
13467368	53831641	28841117	1	1		1	1	1	0	0
13467368	53831641	28841117	1		1	1	1	1	0	0	0	1
55223164	53831641	28841117	1	1		0	1	1	1	0	0
55223164	53831641	28841117	1		1	0	1	1	1	0
36612532	61235864	36328244	0	0	0	1	1	1			0	0
36612532	61235864	36328244	0	1		1	1	1	0	0
36612532	61235864	36328244	0		1	1	1	1	0	0	0	1
84617535	83422366	36328244	0	0	0	1	1	1			0	1
84617535	83422366	36328244	0	1		1	1	1	0	0
84617535	83422366	36328244	0		1	1	1	1	0	0	0	1
44442712	87883827	36328244	0	1		0	1	0	1	0	0
32758242	11486551	31834437	0	1		0	1	1	0	0	0	1
32758242	11486551	31834437	0		1	0	1	1	0	0	0	1
73554646	25512164	31834437	0	0	0	1	1	1			0	0
73554646	25512164	31834437	0	1		1	1	1	0	0	0
73554646	25512164	31834437	0		1	1	1	1	0	0	0
52672466	44725862	45743646	0	0	0	1	0	0			0	1
47442531	45678865	74747556	0	0	0	1	1	1			0	0
47442531	45678865	74747556	0	1		1	1	1	0	0
47442531	45678865	74747556	0		1	1	1	1	0	0	0	1
67778324	65886624	74747556	0	0	0	1	1	1
67778324	65886624	74747556	0	1		1	1	1	0	0	0	0
67778324	65886624	74747556	0		1	1	1	1	0	0	0	1
28378784	65886624	74747556	0	1		0	1	1	1	0	0
28378784	65886624	74747556	0		1	0	1	1	1	0	0	1
43742384	65886624	74747556	0		1	0	0	1	1	0	0
78765575	65886624	74747556	0		1	0	0	1	1	0	0	0
66425531	65886624	74747556	0		1	0	0	1	0	0	0
21725263	45625323	74747556	0	0	0	1	1	0			0	1
21725263	45625323	74747556	0	1		1	1	0	0	0		1
62121782	34375334	22324523	0	0	0	1	1	0			0	0
62121782	34375334	22324523	0	1		1	1	0	0	0
28561467	71224331	82158738	0	0	0	1	0	0			0	0
51363667	41253864	82158738	0	0	0	1	0	0				0
88366671	36541167	38765412	0	0	0	1	1	1
88366671	36541167	38765412	0	1		1	1	1	0	0
88366671	36541167	38765412	0		1	1	1	1	0	0	0
44686884	22627548	85868815	0	0	0	1	1	1			0	0
44686884	22627548	85868815	0	1		1	1	1	0	0	0	0
44686884	22627548	85868815	0		1	1	1	1	0	0	0	0
21484337	47778617	85868815	0	0	0	1	1	1
21484337	47778617	85868815	0	1		1	1	1	0	0	0	1
21484337	47778617	85868815	0		1	1	1	1	0	0	0	1
48635684	47778617	85868815	0		1	0	0	1	1	0	0	0
85654818	57683837	21714176	0	0	0	1	1	1
85654818	57683837	21714176	0	1		1	1	1	0	0
85654818	57683837	21714176	0		1	1	1	1	0	0	0	0
43525764	35838148	21714176	0	1		0	1	1	1	0	0	0
43525764	35838148	21714176	0		1	0	1	1	1	0	0	0
81482734	24164756	87677144	0	0	0	1	1	1
81482734	24164756	87677144	0	1		1	1	1	0	0	0	1
81482734	24164756	87677144	0		1	1	1	1	0	0	0	1
77723846	81173544	87677144	0	0	0	1	0	0
37853853	81578752	87677144	0	0	0	1	1	1			0	1
37853853	81578752	87677144	0	1		1	1	1	0	0	0
37853853	81578752	87677144	0		1	1	1	1	0	0	0
32844575	17411825	36546772	0	0	0	1	0	0			0	1
52414313	17411825	36546772	0	0	0	1	0	1
52414313	17411825	36546772	0		1	1	0	1	0	0	0
83245812	17411825	36546772	0	0	0	1	1	1			0	1
83245812	17411825	36546772	0	1		1	1	1	0	0	0
83245812	17411825	36546772	0		1	1	1	1	0	0	0	1
82824465	17411825	36546772	0	0	0	1	0	1			0	1
82824465	17411825	36546772	0		1	1	0	1	0	0	0
45712135	11842588	36546772	0	1		0	1	1	1	0	0	1
45712135	11842588	36546772	0		1	0	1	1	1	0	0
34433162	11842588	36546772	0	1		0	1	1	1	0	0	1
34433162	11842588	36546772	0		1	0	1	1	1	0	0	1
18266313	54818357	36546772	0	0	0	1	0	0			0	0
74634587	17741378	36546772	0		1	0	0	1	0	0	0
34715127	32341553	63716216	1	0	0	1	0	0			1	1
66575243	32341553	63716216	1	0	0	1	0	0			0	0
63785275	32341553	63716216	1	0	0	1	0	0
72523135	58786725	63716216	1	1		0	1	0	1	0	0	0
17267247	78766756	14378133	0	0	0	1	1	1			0	0
17267247	78766756	14378133	0	1		1	1	1	0	0
17267247	78766756	14378133	0		1	1	1	1	0	0	0	1
73781526	36212458	14378133	0	0	0	1	1	0			0
73781526	36212458	14378133	0	1		1	1	0	0	0	0	0
14345847	14225147	14378133	0	0	0	1	1	1			0	0
14345847	14225147	14378133	0	1		1	1	1	0	0	0
14345847	14225147	14378133	0		1	1	1	1	0	0
42516447	61472228	35132144	0	0	0	1	1	1			0	0
42516447	61472228	35132144	0	1		1	1	1	0	0	0
42516447	61472228	35132144	0		1	1	1	1	0	0	0	0
27478342	34533812	62558135	0	0	0	1	1	0			0	1
27478342	34533812	62558135	0	1		1	1	0	0	0	0	1
36174388	72816555	62558135	0	0	0	1	1	0
36174388	72816555	62558135	0	1		1	1	0	0	0	0	1
66342844	61184462	62558135	0		1	0	0	1	1	0	0
52385723	13646623	84424228	0	0	0	1	1	0
52385723	13646623	84424228	0	1		1	1	0	0	0
44461886	73486137	84424228	0	0	0	1	0	0
77182771	23875625	84424228	0	0	0	1	1	1
77182771	23875625	84424228	0	1		1	1	1	0	0
77182771	23875625	84424228	0		1	1	1	1	0	0	0	1
28271146	72623426	81647441	0	0	0	1	1	1			0
28271146	72623426	81647441	0	1		1	1	1	0	0	0	0
28271146	72623426	81647441	0		1	1	1	1	0	0	0
11682882	24818688	54476126	0	0	0	1	1	0			0	0
11682882	24818688	54476126	0	1		1	1	0	0	0	0
37277735	73425486	41666457	0	0	0	1	1	1			0
37277735	73425486	41666457	0	1		1	1	1	0	0	0	0
37277735	73425486	41666457	0		1	1	1	1	0	0	0	0
25343532	73425486	41666457	0	0	0	1	1	1			0
25343532	73425486	41666457	0	1		1	1	1	0	0	0	1
25343532	73425486	41666457	0		1	1	1	1	0	0	0	1
18764418	47615264	67411526	0	1		0	1	1	1	0	0	0
18764418	47615264	67411526	0		1	0	1	1	1	0	0
67262514	82343425	67411526	0	0	0	1	0	0			0	1
64618328	34315844	21157244	0	0	0	1	1	1
64618328	34315844	21157244	0	1		1	1	1	0	0
64618328	34315844	21157244	0		1	1	1	1	0	0	0
74171576	84616844	21157244	0	0	0	1	0	0
22352484	57488554	21157244	0	1		0	1	1	1	0	0	0
22352484	57488554	21157244	0		1	0	1	1	1	0	0
83875562	64553716	24534171	0	0	0	1	0	0
34615614	86645786	24534171	0	0	0	1	1	1			0
34615614	86645786	24534171	0	1		1	1	1	0	0	0	0
34615614	86645786	24534171	0		1	1	1	1	0	0	0
53316151	46551262	76187155	0	0	0	1	0	1
53316151	46551262	76187155	0		1	1	0	1	0	0	0
44765885	12456726	76187155	0	0	0	1	1	1			0	0
44765885	12456726	76187155	0	1		1	1	1	0	0	0	1
44765885	12456726	76187155	0		1	1	1	1	0	0	0
28645731	12456726	76187155	0		1	0	0	1	1	0	0
13631665	45854685	76187155	0	1		0	1	1	0	1
13631665	45854685	76187155	0		1	0	1	1	0	1	0
52248346	45854685	76187155	0	1		0	1	1	0	1	0	1
52248346	45854685	76187155	0		1	0	1	1	0	1	0	1
44133782	73264513	76187155	0	1		0	1	1	0	1	1	0
44133782	73264513	76187155	0		1	0	1	1	0	1	0	1
41333471	73264513	76187155	0	1		0	1	1	0	1	0	0
41333471	73264513	76187155	0		1	0	1	1	0	1	0
55126621	83121325	76321241	0	0	0	1	1	1
55126621	83121325	76321241	0	1		1	1	1	0	0	0	1
55126621	83121325	76321241	0		1	1	1	1	0	0	0
46433183	26181521	76321241	0	0	0	1	0	0
81252538	55653431	26454273	0	0	0	1	0	0			1	1
13813544	87637754	26454273	0	0	0	1	0	1
13813544	87637754	26454273	0		1	1	0	1	0	0	0
33441432	87637754	26454273	0	1		0	1	1	1	0	0	0
33441432	87637754	26454273	0		1	0	1	1	1	0	0
45843871	22372122	26454273	0	0	0	1	1	0			0	0
45843871	22372122	26454273	0	1		1	1	0	0	0	0	0
77272474	22372122	26454273	0		1	0	0	1	1	0	0
53815541	22372122	26454273	0		1	0	0	1	1	0	0
36117734	65565563	56777867	0	0	0	1	1	0			0	0
36117734	65565563	56777867	0	1		1	1	0	0	0	0	1
55872153	65565563	56777867	0	0	0	1	1	1
55872153	65565563	56777867	0	1		1	1	1	0	0	0	0
55872153	65565563	56777867	0		1	1	1	1	0	0	0
55114172	58654222	66642622	0	0	0	1	1	0			0	0
55114172	58654222	66642622	0	1		1	1	0	0	0
23755814	26174675	86836312	0	1		0	1	0	0	0	0	1
24358115	68674817	86836312	0	0	0	1	0	0			0	1
42882754	58613825	86836312	0	1		0	1	0	1	0	0
11672848	15413658	86836312	0	0	0	1	0	0			0	1
67543471	67546264	42563683	0	0	0	1	0	0			0	0
13112367	54738116	42563683	0	0	0	1	1	0			0	1
13112367	54738116	42563683	0	1		1	1	0	0	0	0	1
52463261	58486741	64133326	0	0	0	1	0	0			0	1
84243565	58486741	64133326	0		1	0	0	1	0	1
36844171	36562424	64133326	0		1	0	0	1	1	0	0
86181646	41835241	64133326	0	0	0	1	1	1			0	1
86181646	41835241	64133326	0	1		1	1	1	0	0	0	1
86181646	41835241	64133326	0		1	1	1	1	0	0	0
22122886	41835241	64133326	0	0	0	1	1	0			0	0
22122886	41835241	64133326	0	1		1	1	0	0	0	0	1
61345567	41835241	64133326	0	0	0	1	1	0			0	1
61345567	41835241	64133326	0	1		1	1	0	0	0	0	0
38262856	87474735	72355664	0	0	0	1	0	1
38262856	87474735	72355664	0		1	1	0	1	0	0	0
16486274	87474735	72355664	0		1	0	0	1	1	0	0
26852358	87474735	72355664	0		1	0	0	1	0	1	0
25778726	83676377	45218475	0	0	0	1	1	1
25778726	83676377	45218475	0	1		1	1	1	0	0	0	0
25778726	83676377	45218475	0		1	1	1	1	0	0	0
58568318	47176785	45218475	0	0	0	1	1	1
58568318	47176785	45218475	0	1		1	1	1	0	0
58568318	47176785	45218475	0		1	1	1	1	0	0	0
76667772	83535653	45218475	0	0	0	1	1	0			0	1
76667772	83535653	45218475	0	1		1	1	0	0	0	0	0
82533236	46461543	71635243	0	0	0	1	1	1			0	1
82533236	46461543	71635243	0	1		1	1	1	0	0	0	1
82533236	46461543	71635243	0		1	1	1	1	0	0	0	1
77837251	21733343	71635243	0	1		0	1	0	0	1	0	1
62317321	21733343	71635243	0	1		0	1	0	0	1
48141775	76843447	57645687	0	0	0	1	0	0			0	1
32433116	76843447	57645687	0	0	0	1	0	0			0	0
46885231	76843447	57645687	0	0	0	1	0	1			0	1
46885231	76843447	57645687	0		1	1	0	1	0	0	0
57477143	76843447	57645687	0	1		0	1	1	1	0	0	0
57477143	76843447	57645687	0		1	0	1	1	1	0	0
38375777	43622586	57645687	0	0	0	1	1	0			0	0
38375777	43622586	57645687	0	1		1	1	0	0	0
77646127	43622586	57645687	0	0	0	1	1	0			0	1
77646127	43622586	57645687	0	1		1	1	0	0	0
88334356	56671731	57645687	0	0	0	1	1	1			0	1
88334356	56671731	57645687	0	1		1	1	1	0	0	0	1
88334356	56671731	57645687	0		1	1	1	1	0	0	0
47435341	56671731	57645687	0	0	0	1	1	0			0	0
47435341	56671731	57645687	0	1		1	1	0	0	0	0
88736372	35757434	34768373	0		1	0	0	1	0	1	0
27113636	66666866	34768373	0	0	0	1	0	0
87522652	66666866	34768373	0	0	0	1	1	0			0	0
87522652	66666866	34768373	0	1		1	1	0	0	0	0	1
42365228	71865343	46268546	0	0	0	1	1	1
42365228	71865343	46268546	0	1		1	1	1	0	0
42365228	71865343	46268546	0		1	1	1	1	0	0	0
24712486	23544444	46268546	0	1		0	1	1	0	1	0	1
24712486	23544444	46268546	0		1	0	1	1	0	1	0
53718747	23544444	46268546	0		1	0	0	1	1	0	0
12131663	76846865	46268546	0	1		0	1	0	1	0	0
61164367	76846865	46268546	0	1		0	1	0	0	1
64342322	31288582	46268546	0		1	0	0	1	0	1	0
46746516	15863782	48848631	0	0	0	1	1	1			0	0
46746516	15863782	48848631	0	1		1	1	1	0	0	0	0
46746516	15863782	48848631	0		1	1	1	1	0	0	0
46371338	82133613	67452371	0	0	0	1	1	0
46371338	82133613	67452371	0	1		1	1	0	0	0	0	0
41241234	74831282	67452371	0	0	0	1	1	0			0
41241234	74831282	67452371	0	1		1	1	0	0	0	0	0
48536564	23188168	67452371	0	0	0	1	0	0			0	0
86667674	23188168	67452371	0	1		0	1	0	1	0	0	1
53253626	75526834	28667176	0	0	0	1	1	1			0	0
53253626	75526834	28667176	0	1		1	1	1	0	0	0
53253626	75526834	28667176	0		1	1	1	1	0	0	0
84848251	75526834	28667176	0		1	0	0	1	1	0	0	0
44832531	18142332	28667176	0		1	0	0	1	0	1	0	1
63354813	87756114	16525821	0	0	0	1	1	0			0	0
63354813	87756114	16525821	0	1		1	1	0	0	0	0	0
48815363	38485777	16525821	0		1	0	0	1	0	1	0
64254685	55146822	13745782	0	0	0	1	1	1			0	0
64254685	55146822	13745782	0	1		1	1	1	0	0	0	1
64254685	55146822	13745782	0		1	1	1	1	0	0	0	0
34534436	13748167	13745782	0	0	0	1	0	0			0	0
54577352	75662522	13745782	0	0	0	1	1	1			1	0
54577352	75662522	13745782	0	1		1	1	1	0	0	0	0
54577352	75662522	13745782	0		1	1	1	1	0	0	0
45535571	25732845	16781873	0	0	0	1	1	1
45535571	25732845	16781873	0	1		1	1	1	0	0
45535571	25732845	16781873	0		1	1	1	1	0	0	0
48683228	25732845	16781873	0		1	0	0	1	1	0	0	1
73583666	41776527	16781873	0	0	0	1	0	0
76772275	85327423	16781873	0	0	0	1	1	1			1	0
76772275	85327423	16781873	0	1		1	1	1	0	0	0	0
76772275	85327423	16781873	0		1	1	1	1	0	0	0
48272413	85327423	16781873	0	0	0	1	1	0			1	1
48272413	85327423	16781873	0	1		1	1	0	0	0	0	1
22623123	85327423	16781873	0	1		0	1	1	1	0	0
22623123	85327423	16781873	0		1	0	1	1	1	0	0
67175115	27617615	16781873	0		1	0	0	1	0	1	0
51463327	67836271	16781873	0	1		0	1	1	1	0	0	0
51463327	67836271	16781873	0		1	0	1	1	1	0	0
38425115	81534357	63185575	0	0	0	1	0	0
38657128	24253114	88471836	0	0	0	1	0	1
38657128	24253114	88471836	0		1	1	0	1	0	0	0	1
67128367	47625154	24585428	0	0	0	1	0	0			0	0
54663561	47625154	24585428	0	0	0	1	0	0
72221531	47625154	24585428	0	1		0	1	0	0	1	0	1
88863474	53328537	24585428	0	0	0	1	1	0			0	0
88863474	53328537	24585428	0	1		1	1	0	0	0	0	1
85664277	12564885	24585428	0	1		0	1	0	1	0	0
83588286	16184158	36618434	0	0	0	1	1	1			0	0
83588286	16184158	36618434	0	1		1	1	1	0	0	0
83588286	16184158	36618434	0		1	1	1	1	0	0	0
15627652	16184158	36618434	0	0	0	1	0	1
15627652	16184158	36618434	0		1	1	0	1	0	0	0
78284854	57531318	36618434	0	0	0	1	0	1
78284854	57531318	36618434	0		1	1	0	1	0	0	0
84518252	74216645	36618434	0	0	0	1	1	0			0	0
84518252	74216645	36618434	0	1		1	1	0	0	0	0	0
14726811	65223285	85372842	0	0	0	1	1	1			0	1
14726811	65223285	85372842	0	1		1	1	1	0	0	0
14726811	65223285	85372842	0		1	1	1	1	0	0	0	1
15482246	65223285	85372842	0	0	0	1	1	1			0	1
15482246	65223285	85372842	0	1		1	1	1	0	0
15482246	65223285	85372842	0		1	1	1	1	0	0
54638761	65223285	85372842	0	1		0	1	1	1	0
54638761	65223285	85372842	0		1	0	1	1	1	0	0	1
63556683	31344215	27854433	0	0	0	1	0	0			0	1
75852653	31344215	27854433	0	1		0	1	1	0	1	0	0
75852653	31344215	27854433	0		1	0	1	1	0	1	0
17572217	31344215	27854433	0	1		0	1	1	0	1	0	1
17572217	31344215	27854433	0		1	0	1	1	0	1	0	1
13378434	84233557	61136866	0	1		0	1	1	1	0
13378434	84233557	61136866	0		1	0	1	1	1	0	0
65138123	22566561	61136866	0	0	0	1	1	1
65138123	22566561	61136866	0	1		1	1	1	0	0	0	1
65138123	22566561	61136866	0		1	1	1	1	0	0	0
55241183	45656217	64713365	0	0	0	1	1	1			0	0
55241183	45656217	64713365	0	1		1	1	1	0	0	0	0
55241183	45656217	64713365	0		1	1	1	1	0	0	0
18266338	43112388	64713365	0	0	0	1	0	0			0	0
18435552	72871415	64713365	0		1	0	0	1	0	0	0
34381765	71855238	11182221	0	0	0	1	0	0			0	1
23757373	38873222	11182221	0	0	0	1	1	1
23757373	38873222	11182221	0	1		1	1	1	0	0	0	1
23757373	38873222	11182221	0		1	1	1	1	0	0	0
56238614	53584552	61751277	0	0	0	1	1	1			0
56238614	53584552	61751277	0	1		1	1	1	0	0
56238614	53584552	61751277	0		1	1	1	1	0	0	0
12123142	37846624	61751277	0		1	0	0	1	0	0	0
15158121	27587151	28168827	0	0	0	1	1	1			0	0
15158121	27587151	28168827	0	1		1	1	1	0	0	0	1
15158121	27587151	28168827	0		1	1	1	1	0	0	0	0
68314561	27587151	28168827	0		1	0	0	1	0	0	0	1
77345118	27587151	28168827	0		1	0	0	1	0	0	0	0
42844768	13514125	28168827	0	0	0	1	0	1			0	0
42844768	13514125	28168827	0		1	1	0	1	0	0	0	1
63855636	13514125	28168827	0	0	0	1	1	1			0	0
63855636	13514125	28168827	0	1		1	1	1	0	0	0	1
63855636	13514125	28168827	0		1	1	1	1	0	0	0
51447768	48642417	28168827	0		1	0	0	1	1	0	0	0
71115565	18542443	28168827	0	1		0	1	1	0	1	0	0
71115565	18542443	28168827	0		1	0	1	1	0	1	0	0
65323317	31778244	23687845	0	0	0	1	0	0			0	1
[truncated: 928 more rows]
