# Supplementary material for: Effects of an urban sanitation intervention on childhood enteric infection and diarrhea in Maputo, Mozambique: A controlled before-and-after trial
Source: eLife. 2021 Apr 9;10:e62278. doi: 10.7554/eLife.62278 (PMC8121544; doi:10.7554/eLife.62278)
Supplement: Table 1—source data 1. [file elife-62278-table1-data1.xlsx]

## Sheet: Sheet1
phase_ml_analysis	studyArm_binary	totHHid	compID	female	ch_respmom	momalive	carerEDU	breast	ch_exclbreast	ch_diaper	saferFeces	age_sampDays	age_days	rainfall_sample	drophole	ventpipe	pedestal	drinkWat	personsPerRoomCat	hhCement	hh_walls	Hhsize	hhrooms	persons_room	povNormal	latWall	compElec	compWatStand	compWasteStand	compAnyAnimal	compDog	compFowl	compCat	compOtherAnimal	compPoop	compFlood	compLat	watPoint	hl_den	persons_latrine	households_latrine	persons_waterpoint	CompPop	numHH	persons_latrine	households_latrine
1	1	73742773	81841384	1	1		0	1	1	1	0	142	143.413	49.3	0	1	1	1	0	1	0	3	2	1.5	0.43617	1	1	0	0	1	1	0	1	0	1	1	3	2	0.18383	36.6667	9	55	110	27	36.6667	9
	1	73742773	81841384	1	1		0	1	0	1	0	549	551.255	26.1	0	1	1	1	0	1	0	3	2	1.5	0.38298	1	1	0	0	1	0	0	1	0	0	1	3	3	0.14205	28.3333	9.3333	28.3333	85	28	28.3333	9.3333
	1	58588734	81841384	1	1		0	0	0	0	1	1639	1877.39	35.1	0	1	1	1	0	1	0	4	2	2	0.44681	1	1	0	0	1	0	0	1	0	0	1	3	3	0.14205	28.3333	9.3333	28.3333	85	28	28.3333	9.3333
1	1	43546741	81841384	0	1		0	1	0	1	0	455	457.43	49.3	0	1	1	1	0	1	1	4	2	2	0.46809	1	1	0	0	1	1	0	1	0	1	1	3	2	0.18383	36.6667	9	55	110	27	36.6667	9
0	1	61565211	81841384	1	0	1	0	0	0	1	0	540	603.482	125	0	0	0	1	1	1	0	9	2	4.5	0.34	1	1	0	1	1	1	0	1	0	1	1	1	2	0.11698	70	26	35	70	26	70	26
	1	61565211	81841384	1	0	1	0	0	0	0	1	1351	1356.51	26.1	0	1	1	1	0	1	0	6	2	3	0.39362	1	1	0	0	1	0	0	1	0	0	1	3	3	0.14205	28.3333	9.3333	28.3333	85	28	28.3333	9.3333
0	1	61565211	81841384	1	0	1	0	0	0	1	0	540	603.485	125	0	0	0	1	1	1	0	9	2	4.5	0.34	1	1	0	1	1	1	0	1	0	1	1	1	2	0.11698	70	26	35	70	26	70	26
	1	61565211	81841384	1	0	1	0	0	0	0	1	1351	1356.52	26.1	0	1	1	1	0	1	0	6	2	3	0.39362	1	1	0	0	1	0	0	1	0	0	1	3	3	0.14205	28.3333	9.3333	28.3333	85	28	28.3333	9.3333
0	1	76716757	81841384	0	1	1	0	0	0	0	1		875.465		0	0	0	0	1	1	0	7	2	3.5	0.21	1	1	0	1	1	1	0	1	0	1	1	1	2	0.11698	70	26	35	70	26	70	26
1	1	76716757	81841384	0	0	1	0	0	0	0	1	1310	1344.49	11.2	0	1	1	1	0	1	0	7	3	2.3333	0.25532	1	1	0	0	1	1	0	1	0	1	1	3	2	0.18383	36.6667	9	55	110	27	36.6667	9
	1	76716757	81841384	0		1	0					1759		35.1	0	1	1	1	0	1	0	7	3	2.3333	0.25532	1	1	0	0	1	0	0	1	0	0	1	3	3	0.14205	28.3333	9.3333	28.3333	85	28	28.3333	9.3333
1	1	76716757	81841384	0	1		1	1	0	1	0	257	259.473	49.3	0	1	1	1	0	1	0	7	3	2.3333	0.25532	1	1	0	0	1	1	0	1	0	1	1	3	2	0.18383	36.6667	9	55	110	27	36.6667	9
	1	76716757	81841384	0			1					801		35.1	0	1	1	1	0	1	0	7	3	2.3333	0.25532	1	1	0	0	1	0	0	1	0	0	1	3	3	0.14205	28.3333	9.3333	28.3333	85	28	28.3333	9.3333
0	1	41531222	81841384	0	1	1	1	1	0	1	0	172	233.435	125	0	0	0	0	0	1	0	5	3	1.6667	0.28	1	1	0	1	1	1	0	1	0	1	1	1	2	0.11698	70	26	35	70	26	70	26
1	1	41531222	81841384	0	1	1	1	0	0	1	0	576	576.432	49.3	0	1	1	1	0	1	1	7	3	2.3333	0.32979	1	1	0	0	1	1	0	1	0	1	1	3	2	0.18383	36.6667	9	55	110	27	36.6667	9
	1	41531222	81841384	0	1	1	0	0	0	0	1	983	985.26	26.1	0	1	1	1	0	1	1	3	1	3	0.45745	1	1	0	0	1	0	0	1	0	0	1	3	3	0.14205	28.3333	9.3333	28.3333	85	28	28.3333	9.3333
	1	81528276	81841384	0	1		0	1	0	1	0	319	321.272	26.1	0	1	1	1	1	1	0	4	1	4	0.44681	1	1	0	0	1	0	0	1	0	0	1	3	3	0.14205	28.3333	9.3333	28.3333	85	28	28.3333	9.3333
0	1	24687352	81841384	1	1	1	0	1	0	1	0	74	135.427	125	0	0	0	0	0	1	0	3	2	1.5	0.42	1	1	0	1	1	1	0	1	0	1	1	1	2	0.11698	70	26	35	70	26	70	26
1	1	24687352	81841384	1	1	1	1	0	0	1	0	716	610.462	60.5	0	1	1	0	0	1	0	3	1	3	0.38298	1	1	0	0	1	1	0	1	0	1	1	3	2	0.18383	36.6667	9	55	110	27	36.6667	9
	1	24687352	81841384	1	1	1	0	0	0	0	1	885	887.268	26.1	0	1	1	1	0	1	0	2	1	2	0.45745	1	1	0	0	1	0	0	1	0	0	1	3	3	0.14205	28.3333	9.3333	28.3333	85	28	28.3333	9.3333
0	1	61132326	81841384	0	1	1	1	0	0	1	0	808	869.43	125	0	0	0	0	0	1	0	3	2	1.5	0.54	1	1	0	1	1	1	0	1	0	1	1	1	2	0.11698	70	26	35	70	26	70	26
1	1	61132326	81841384	0	1	1	0	0	0	0	1	1262	1261.49	13.7	0	1	1	1	0	1	0	4	2	2	0.42553	1	1	0	0	1	1	0	1	0	1	1	3	2	0.18383	36.6667	9	55	110	27	36.6667	9
	1	87355871	81841384	0	1		0	0	0	0	1	1239	1613.4	26.1	0	1	1	1	0	1	0	3	1	3	0.47872	1	1	0	0	1	0	0	1	0	0	1	3	3	0.14205	28.3333	9.3333	28.3333	85	28	28.3333	9.3333
	1	67826874	81841384	1	1		0	0	0	0	1	831	1205.35	26.1	0	1	1	1	0	1	1	3	1	3	0.60638	1	1	0	0	1	0	0	1	0	0	1	3	3	0.14205	28.3333	9.3333	28.3333	85	28	28.3333	9.3333
1	1	42712142	81841384	0	1		0	0	0	0	1	1310	1311.45	49.3	0	1	1	1	1	1	0	4	1	4	0.39362	1	1	0	0	1	1	0	1	0	1	1	3	2	0.18383	36.6667	9	55	110	27	36.6667	9
	1	42712142	81841384	0	1		0	0	0	0	1	1717	2092.36	26.1	0	1	1	1	0	1	0	5	2	2.5	0.41489	1	1	0	0	1	0	0	1	0	0	1	3	3	0.14205	28.3333	9.3333	28.3333	85	28	28.3333	9.3333
	1	61888542	81841384	0	1		0	0	0	0	1	1092	1471.45	26.1	0	1	1	1	0	1	0	2	1	2	0.45745	1	1	0	0	1	0	0	1	0	0	1	3	3	0.14205	28.3333	9.3333	28.3333	85	28	28.3333	9.3333
	1	35844852	36868786	0	1		1	0	0	1	0	377	762.492	25.1	0	1	1	1	0	1	1	4	2	2	0.52128	1	1	0	0	1	0	0	1	0	0	0	2	3	0.041547	22.5	6.5	15	45	13	22.5	6.5
0	1	22288374	36868786	1	1	1	1	0	0	1	0	478	536.393	125	1	1	1	1	0	1	1	5	3	1.6667	0.46	1	1	1	0	1	0	0	1	0	0	1	2	1	0.052627	28.5	7.5	57	57	15	28.5	7.5
1	1	22288374	36868786	1	0	1	1	0	0	0	1	932	889.267	13.7	1	1	1	1	0	1	1	6	2	3	0.43617	1	1	0	0	1	0	0	1	0	0	0	2	2	0.048934	26.5	8	26.5	53	16	26.5	8
	1	22288374	36868786	1	1	1	0	0	0	0	1	1282	1283.27	25.1	0	1	1	1	0	1	1	5	2	2.5	0.48936	1	1	0	0	1	0	0	1	0	0	0	2	3	0.041547	22.5	6.5	15	45	13	22.5	6.5
0	1	22288374	36868786	0	1	1	1	0	0	0	1	1165	1222.4	155	1	1	1	1	0	1	1	5	3	1.6667	0.46	1	1	1	0	1	0	0	1	0	0	1	2	1	0.052627	28.5	7.5	57	57	15	28.5	7.5
1	1	22288374	36868786	0	0	1	1	0	0	0	1	1618	1575.27	13.7	1	1	1	1	0	1	1	6	2	3	0.43617	1	1	0	0	1	0	0	1	0	0	0	2	2	0.048934	26.5	8	26.5	53	16	26.5	8
	1	22288374	36868786	0	1	1	0	0	0	0	1	1968	1969.27	25.1	0	1	1	1	0	1	1	5	2	2.5	0.48936	1	1	0	0	1	0	0	1	0	0	0	2	3	0.041547	22.5	6.5	15	45	13	22.5	6.5
	1	78484155	36868786	1	1		0	0	0	0	1	575	960.498	25.1	0	1	1	1	1	1	1	6	1	6	0.28723	1	1	0	0	1	0	0	1	0	0	0	2	3	0.041547	22.5	6.5	15	45	13	22.5	6.5
	1	78484155	36868786											25.1	0	1	1	1	1	1	1	6	1	6	0.28723	1	1	0	0	1	0	0	1	0	0	0	2	3	0.041547	22.5	6.5	15	45	13	22.5	6.5
0	1	58856432	36868786	0	0	1	0	0	0	1	0	1071	1129.4	125	1	0	0	0	0	1	1	5	2	2.5	0.52	1	1	1	0	1	0	0	1	0	0	1	2	1	0.052627	28.5	7.5	57	57	15	28.5	7.5
	1	58856432	36868786	0	0	1	0	0	0	0	1	1876	1876.27	25.1	0	1	1	1	0	1	1	5	2	2.5	0.45745	1	1	0	0	1	0	0	1	0	0	0	2	3	0.041547	22.5	6.5	15	45	13	22.5	6.5
0	1	14814488	36868786	1	0	1	1	0	0	0	1	770	828.408	125	1	1	1	1	0	1	0	3	3	1	0.42	1	1	1	0	1	0	0	1	0	0	1	2	1	0.052627	28.5	7.5	57	57	15	28.5	7.5
1	1	14814488	36868786	1	0	1	1	0	0	0	1	1225	1188.39	13.7	1	1	1	1	0	1	0	4	2	2	0.41489	1	1	0	0	1	0	0	1	0	0	0	2	2	0.048934	26.5	8	26.5	53	16	26.5	8
	1	14814488	36868786	1	1	1	0	0	0	0	1	1574	1959.51	25.1	0	1	1	1	1	1	0	4	1	4	0.29787	1	1	0	0	1	0	0	1	0	0	0	2	3	0.041547	22.5	6.5	15	45	13	22.5	6.5
1	1	14814488	36868786	0	0		1	1	0	1	0	443	329.396	0	1	1	1	1	0	1	0	4	2	2	0.41489	1	1	0	0	1	0	0	1	0	0	0	2	2	0.048934	26.5	8	26.5	53	16	26.5	8
	1	14814488	36868786	0	1		0	0	0	0	1	716	1100.52	25.1	0	1	1	1	1	1	0	4	1	4	0.29787	1	1	0	0	1	0	0	1	0	0	0	2	3	0.041547	22.5	6.5	15	45	13	22.5	6.5
1	1	28136575	36868786	0	0		1	1	0	1	0	283	283.403	54.4	1	1	1	1	0	1	0	3	2	1.5	0.53191	1	1	0	0	1	0	0	1	0	0	0	2	2	0.048934	26.5	8	26.5	53	16	26.5	8
1	1	38525124	36868786											54.4	1	1	1	1	0	1	0	4	2	2	0.30851	1	1	0	0	1	0	0	1	0	0	0	2	2	0.048934	26.5	8	26.5	53	16	26.5	8
0	1	41741457	66167844	0	1	1	1	0	0	1	0	717	774.41	155					0	1	1	4	2	2	0.47872	1	1	0	1	0	0	0	0	0	0	0	1	5	0.12842	62	13	12.4	62	13	62	13
1	1	41741457	66167844	0	1	1	1	0	0	0	1		1130.32		1	1	1	1	0	1	1	4	2	2	0.47872	1	1	0	0	1	1	0	1	0	0	0	2	2	0.13256	32	6.5	32	64	13	32	6.5
0	1	38685148	66167844	0	1	1	0	1	0	1	0	352	414.409	155	0	0	0	1	1	1	1	7	1	7	0.28	1	1	0	1	0	0	0	0	0	0	0	1	5	0.12842	62	13	12.4	62	13	62	13
1	1	38685148	66167844	0	1	1	0	0	0	0	1	763	763.418	54.4	1	1	1	1	1	1	1	7	2	3.5	0.26596	1	1	0	0	1	1	0	1	0	0	0	2	2	0.13256	32	6.5	32	64	13	32	6.5
	1	38685148	66167844	0	1	1	0	0	0	1	0	1155	1156.46	25.1	0	1	1	1	1	1	1	7	2	3.5	0.30851	1	1	0	0	1	0	0	1	0	0	0	2	4	0.062137	15	6	7.5	30	12	15	6
0	1	38685148	66167844	1	1	1	0	1	0	1	0	352	414.414	155	0	0	0	1	1	1	1	7	1	7	0.28	1	1	0	1	0	0	0	0	0	0	0	1	5	0.12842	62	13	12.4	62	13	62	13
1	1	38685148	66167844	1	1	1	0	0	0	1	0	763	763.424	54.4	1	1	1	1	1	1	1	7	2	3.5	0.26596	1	1	0	0	1	1	0	1	0	0	0	2	2	0.13256	32	6.5	32	64	13	32	6.5
	1	38685148	66167844	1	1	1	0	0	0	1	0	1156	1156.47	25.1	0	1	1	1	1	1	1	7	2	3.5	0.30851	1	1	0	0	1	0	0	1	0	0	0	2	4	0.062137	15	6	7.5	30	12	15	6
0	1	86323712	66167844	0	0	1	0	1	0	1	0	237	476.506	155	0	0	0	1	1	1	0	9	1	9	0.19	1	1	0	1	0	0	0	0	0	0	0	1	5	0.12842	62	13	12.4	62	13	62	13
1	1	86323712	66167844	0	1	1	1	0	0	1	0	706	649.343	51.3	1	1	1	1	1	1	0	7	1	7	0.14894	1	1	0	0	1	1	0	1	0	0	0	2	2	0.13256	32	6.5	32	64	13	32	6.5
	1	86323712	66167844	0	1	1	0	0	0	0	1		1041.46		0	1	1	1	1	1	1	9	2	4.5	0.28723	1	1	0	0	1	0	0	1	0	0	0	2	4	0.062137	15	6	7.5	30	12	15	6
	1	64671853	66167844	0	1		1	1	0	1	0	214	215.35	25.1	0	1	1	1	0	1	1	5	2	2.5	0.45745	1	1	0	0	1	0	0	1	0	0	0	2	4	0.062137	15	6	7.5	30	12	15	6
1	1	65826532	66167844	1	1		0	1	1	1	0		282.386		1	1	1	1	0	1	1	7	3	2.3333	0.41489	1	1	0	0	1	1	0	1	0	0	0	2	2	0.13256	32	6.5	32	64	13	32	6.5
0	1	33577656	66167844	0	1	1	0	0	0	1	0	590	829.509	155					1	1	1	7	2	3.5	0.2234	1	1	0	1	0	0	0	0	0	0	0	1	5	0.12842	62	13	12.4	62	13	62	13
1	1	33577656	66167844	0	1	1	1	0	0	0	1	1006	1006.28	29.3	1	1	1	1	1	1	1	7	2	3.5	0.2234	1	1	0	0	1	1	0	1	0	0	0	2	2	0.13256	32	6.5	32	64	13	32	6.5
	1	33577656	66167844	0	0	1	0	0	0	0	1	1395	1394.52	25.1	0	1	1	1	1	1	1	7	2	3.5	0.30851	1	1	0	0	1	0	0	1	0	0	0	2	4	0.062137	15	6	7.5	30	12	15	6
0	1	51865436	66167844	0	1	1	0	1	0	1	0	165	222.425	155	0	0	0	1	1	1	1	4	1	4	0.41	1	1	0	1	0	0	0	0	0	0	0	1	5	0.12842	62	13	12.4	62	13	62	13
0	1	34268432	66167844	0	0	0	1	0	0	1	0		1076.43		0	0	0	1	0	1	1	8	3	2.6667	0.33	1	1	0	1	0	0	0	0	0	0	0	1	5	0.12842	62	13	12.4	62	13	62	13
1	1	34268432	66167844	0	1	0	1	0	0	0	1	1591	1430.39	0	1	1	1	1	0	1	1	8	4	2	0.39362	1	1	0	0	1	1	0	1	0	0	0	2	2	0.13256	32	6.5	32	64	13	32	6.5
	1	34268432	66167844	0	0	0	1	0	0	0	1		1824.38		0	1	1	1	0	1	1	9	3	3	0.39362	1	1	0	0	1	0	0	1	0	0	0	2	4	0.062137	15	6	7.5	30	12	15	6
0	1	76316124	66167844	1	0	0	0	0	0	0	1		1254.43		0	0	0	1	0	1	1	6	2	3	0.37	1	1	0	1	0	0	0	0	0	0	0	1	5	0.12842	62	13	12.4	62	13	62	13
1	1	76316124	66167844	1	0	0	1	0	0	0	0		1608.37		1	1	1	1	0	1	1	6	2	3	0.43617	1	1	0	0	1	1	0	1	0	0	0	2	2	0.13256	32	6.5	32	64	13	32	6.5
	1	76316124	66167844	1	0	0	0	0	0	0	1	2001	2001.47	25.1	0	1	1	1	0	1	1	6	2	3	0.32979	1	1	0	0	1	0	0	1	0	0	0	2	4	0.062137	15	6	7.5	30	12	15	6
0	1	51636453	77873583	0	1	1	1	0	0	0	0		1124.7		1	0	1	1	0	1	1	4	2	2	0.7	1	1	1	0	0	0	0	0	0	0	1	3	4	0.057755	15.3333	4.3333	11.5	46	13	15.3333	4.3333
1	1	51636453	77873583	0	1	1	1	0	0	0	1	1468	1468.41	54.4	0	1	1	1	0	1	1	4	2	2	0.5	1	1	1	0	1	0	0	1	0	0	0	3	3	0.027622	7.3333	5.3333	7.3333	22	16	7.3333	5.3333
	1	51636453	77873583	0	1	1	1	0	0	0	1	1862	1893.87	25.1	1	1	1	1	0	1	1	4	2	2	0.48936	1	1	0	0	1	1	0	1	0	0	0	3	4	0.036411	9.6667	4.3333	7.25	29	13	9.6667	4.3333
	1	52343652	77873583	0	1		1	1	0	1	0	315	314.997	25.1	1	1	1	1	0	1	1	3	2	1.5	0.60638	1	1	0	0	1	1	0	1	0	0	0	3	4	0.036411	9.6667	4.3333	7.25	29	13	9.6667	4.3333
0	1	24447728	77873583	1	1	1	1	1	0	1	0	392	457.689	155	1	1	0	1	0	1	1	8	3	2.6667	0.43	1	1	1	0	0	0	0	0	0	0	1	3	4	0.057755	15.3333	4.3333	11.5	46	13	15.3333	4.3333
1	1	24447728	77873583	1	0	1	1	0	0	0	1	1036	801.379	74.4	0	1	1	1	1	1	0	8	2	4	0.29787	1	1	1	0	1	0	0	1	0	0	0	3	3	0.027622	7.3333	5.3333	7.3333	22	16	7.3333	5.3333
	1	24447728	77873583	1	0	1	0	0	0	0	1	1195	1226.88	25.1	1	1	1	1	0	1	0	8	3	2.6667	0.31915	1	1	0	0	1	1	0	1	0	0	0	3	4	0.036411	9.6667	4.3333	7.25	29	13	9.6667	4.3333
0	1	24447728	77873583	0	0	1	1	0	0	1	0		607.818		1	1	0	1	0	1	1	8	3	2.6667	0.43	1	1	1	0	0	0	0	0	0	0	1	3	4	0.057755	15.3333	4.3333	11.5	46	13	15.3333	4.3333
1	1	24447728	77873583	0		1	1					1013		51.3	0	1	1	1	1	1	0	8	2	4	0.29787	1	1	1	0	1	0	0	1	0	0	0	3	3	0.027622	7.3333	5.3333	7.3333	22	16	7.3333	5.3333
	1	24447728	77873583	0	0	1	1	0	0	0	1	1347	1378.87	25.1	1	1	1	1	0	1	0	8	3	2.6667	0.31915	1	1	0	0	1	1	0	1	0	0	0	3	4	0.036411	9.6667	4.3333	7.25	29	13	9.6667	4.3333
0	1	52582421	77873583	0	1	1	0	0	0	0	1		1039.81		1	1	0	1	0	0	1	4	2	2	0.37	1	1	1	0	0	0	0	0	0	0	1	3	4	0.057755	15.3333	4.3333	11.5	46	13	15.3333	4.3333
1	1	52582421	77873583	0	1	1	0	0	0	0	1	1425	1366.43	47.2	0	1	1	1	0	1	0	4	2	2	0.29787	1	1	1	0	1	0	0	1	0	0	0	3	3	0.027622	7.3333	5.3333	7.3333	22	16	7.3333	5.3333
	1	52582421	77873583	0	1	1	0	0	0	0	1	1766	1791.87	25.1	1	1	1	1	0	0	1	4	2	2	0.45745	1	1	0	0	1	1	0	1	0	0	0	3	4	0.036411	9.6667	4.3333	7.25	29	13	9.6667	4.3333
0	1	58687778	33378518	1	1	1	1	1	1	1	0	277	329.862	81.1	1	1	1	1	0	1	0	4	2	2	0.48	1	1	1	1	1	0	0	1	0	0	0	4	7	0.063062	22.5	5.75	12.8571	90	23	22.5	5.75
0	1	58687778	33378518	1	1	1	1	0	0	0	1	987	1039.87	81.1	1	1	1	1	0	1	0	4	2	2	0.48	1	1	1	1	1	0	0	1	0	0	0	4	7	0.063062	22.5	5.75	12.8571	90	23	22.5	5.75
	1	77325736	33378518	1	1		0	1	0	1	0	309	310.836	26.1	0	1	1	1	0	1	1	5	2	2.5	0.38298	1	1	1	0	1	1	0	1	0	0	0	3	9	0.043442	20.6667	6	6.8889	62	18	20.6667	6
0	1	15521483	33378518	1	1	1	1	0	0	0	1	702	754.875	81.1	1	1	1	1	0	1	1	2	5	0.4	0.73	1	1	1	1	1	0	0	1	0	0	0	4	7	0.063062	22.5	5.75	12.8571	90	23	22.5	5.75
1	1	15521483	33378518	1	1	1	0	0	0	0	1	1146	1097.4	13.7	0	1	1	1	0	1	1	5	3	1.6667	0.46809	1	1	0	0	1	1	0	1	0	0	0	3	5	0.039238	18.6667	7.6667	11.2	56	23	18.6667	7.6667
1	1	76153651	33378518	0	1		1	1	0	1	0	431	370.388	47.2	0	1	1	1	0	1	1	3	2	1.5	0.45745	1	1	0	0	1	1	0	1	0	0	0	3	5	0.039238	18.6667	7.6667	11.2	56	23	18.6667	7.6667
1	1	86855623	33378518	1	1		1	1	0	1	0	476	415.365	47.2	0	1	1	1	0	1	1	6	3	2	0.44681	1	1	0	0	1	1	0	1	0	0	0	3	5	0.039238	18.6667	7.6667	11.2	56	23	18.6667	7.6667
	1	86855623	33378518	1	0		1	0	0	0	1	960	1193.4	35.1	0	1	1	1	0	1	1	7	3	2.3333	0.41489	1	1	1	0	1	1	0	1	0	0	0	3	9	0.043442	20.6667	6	6.8889	62	18	20.6667	6
0	1	74438527	33378518	1	1	1	1	0	0	1	0	784	829.434	81.1	1	0	1	1	0	1	1	5	5	1	0.45	1	1	1	1	1	0	0	1	0	0	0	4	7	0.063062	22.5	5.75	12.8571	90	23	22.5	5.75
1	1	74438527	33378518	1	1	1	0	0	0	0	1	1179	1179.35	49.3	0	1	1	1	0	1	1	7	4	1.75	0.31915	1	1	0	0	1	1	0	1	0	0	0	3	5	0.039238	18.6667	7.6667	11.2	56	23	18.6667	7.6667
	1	74438527	33378518	1	1	1	0	0	0	0	1	1583	1584.04	25.1	0	1	1	1	0	1	1	7	4	1.75	0.2234	1	1	1	0	1	1	0	1	0	0	0	3	9	0.043442	20.6667	6	6.8889	62	18	20.6667	6
0	1	74438527	33378518	1	1	1	1	0	0	0	1		1461.44		1	0	1	1	0	1	1	5	5	1	0.45	1	1	1	1	1	0	0	1	0	0	0	4	7	0.063062	22.5	5.75	12.8571	90	23	22.5	5.75
1	1	74438527	33378518	1	1	1	0	0	0	0	1	1811	1811.36	49.3	0	1	1	1	0	1	1	7	4	1.75	0.31915	1	1	0	0	1	1	0	1	0	0	0	3	5	0.039238	18.6667	7.6667	11.2	56	23	18.6667	7.6667
	1	74438527	33378518	1	1	1	0	0	0	0	1	2215	2216.04	25.1	0	1	1	1	0	1	1	7	4	1.75	0.2234	1	1	1	0	1	1	0	1	0	0	0	3	9	0.043442	20.6667	6	6.8889	62	18	20.6667	6
0	1	18511162	33378518	1	1	1	1	0	0	1	0	619	664.445	81.1	1	1	1	1	0	1	1	3	4	0.75	0.49	1	1	1	1	1	0	0	1	0	0	0	4	7	0.063062	22.5	5.75	12.8571	90	23	22.5	5.75
1	1	18511162	33378518	1	1	1	1	0	0	0	1	1014	1014.37	49.3	0	1	1	1	0	1	1	3	3	1	0.52128	1	1	0	0	1	1	0	1	0	0	0	3	5	0.039238	18.6667	7.6667	11.2	56	23	18.6667	7.6667
	1	18511162	33378518	1	1	1	1	0	0	0	1	1560	1793.39	35.1	0	1	1	1	0	1	1	3	2	1.5	0.60638	1	1	1	0	1	1	0	1	0	0	0	3	9	0.043442	20.6667	6	6.8889	62	18	20.6667	6
	1	72778822	33378518	0	1		0	1	0	1	0	348	349.869	26.1	0	1	1	1	0	1	1	5	3	1.6667	0.48936	1	1	1	0	1	1	0	1	0	0	0	3	9	0.043442	20.6667	6	6.8889	62	18	20.6667	6
	1	41517882	33378518	0	1		0	1	0	1	0	514	375.007	35.1	0	1	1	1	0	1	0	3	2	1.5	0.53191	1	1	1	0	1	1	0	1	0	0	0	3	9	0.043442	20.6667	6	6.8889	62	18	20.6667	6
0	1	38565143	28118583	0	1	1	0	0	0	0	1	795	847.398	81.1	1	1	1	1	0	1	0	9	3	3	0.29	1	1	1	0	1	0	0	1	0	0	0	1	17	0.045295	42	17	2.4706	42	17	42	17
1	1	38565143	28118583	0	0	1	1	0	0	0	1	1253	1190.38	47.2	1	1	1	1	0	1	0	8	3	2.6667	0.29787	1	1	0	0	1	0	0	1	0	0	0	4	12	0.08304	19.25	4.25	6.4167	77	17	19.25	4.25
	1	38565143	28118583	0	0	1	1	0	0	0	1	1596	1972.42	26.1	0	1	1	1	1	1	1	9	2	4.5	0.3617	1	1	0	0	1	0	0	1	0	0	0	4	4	0.075491	17.5	4.5	17.5	70	18	17.5	4.5
1	1	56178535	28118583	1	1		1	1	0	1	0		186.364		1	1	1	1	0	1	0	4	3	1.3333	0.45745	1	1	0	0	1	0	0	1	0	0	0	4	12	0.08304	19.25	4.25	6.4167	77	17	19.25	4.25
0	1	53456446	28118583	1	0	1	0	1	0	1	0	311	361.509	81.1	1	1	1	1	0	1	0	9	3	3	0.29	1	1	1	0	1	0	0	1	0	0	0	1	17	0.045295	42	17	2.4706	42	17	42	17
1	1	53456446	28118583	1	1	1	1	0	0	1	0	808	708.386	2	1	1	1	1	0	1	0	5	4	1.25	0.34043	1	1	0	0	1	0	0	1	0	0	0	4	12	0.08304	19.25	4.25	6.4167	77	17	19.25	4.25
	1	53456446	28118583	1	0	1	1	0	0	0	1		1488.42		0	1	1	1	1	1	1	4	1	4	0.48936	1	1	0	0	1	0	0	1	0	0	0	4	4	0.075491	17.5	4.5	17.5	70	18	17.5	4.5
0	1	71741546	28118583	1	0	1	1	0	0	1	0	182	232.515	81.1	1	1	1	1	0	1	0	5	2	2.5	0.31	1	1	1	0	1	0	0	1	0	0	0	1	17	0.045295	42	17	2.4706	42	17	42	17
1	1	71741546	28118583	1	1	1	1	0	0	0	0	679	679.403	2	1	1	1	1	0	1	0	5	2	2.5	0.23404	1	1	0	0	1	0	0	1	0	0	0	4	12	0.08304	19.25	4.25	6.4167	77	17	19.25	4.25
	1	71741546	28118583	1	1	1	0	0	0	0	1	983	983.356	26.1	0	1	1	1	0	1	0	4	2	2	0.29787	1	1	0	0	1	0	0	1	0	0	0	4	4	0.075491	17.5	4.5	17.5	70	18	17.5	4.5
0	1	23114577	28118583	1	1	1	1	1	0	1	0	118	170.381	81.1	1	1	1	1	0	1	0	4	2	2	0.44	1	1	1	0	1	0	0	1	0	0	0	1	17	0.045295	42	17	2.4706	42	17	42	17
1	1	23114577	28118583	1	0	1	0	0	0	0	1	640	513.37	0	1	1	1	1	1	1	0	7	2	3.5	0.23404	1	1	0	0	1	0	0	1	0	0	0	4	12	0.08304	19.25	4.25	6.4167	77	17	19.25	4.25
0	1	81725581	28118583	1	1	1	1	1	0	1	0	535	587.392	81.1	1	1	1	1	0	1	0	5	2	2.5	0.38	1	1	1	0	1	0	0	1	0	0	0	1	17	0.045295	42	17	2.4706	42	17	42	17
1	1	81725581	28118583	1	1	1	1	0	0	0	1	994	930.314	51.3	1	1	1	1	0	1	0	5	2	2.5	0.3617	1	1	0	0	1	0	0	1	0	0	0	4	12	0.08304	19.25	4.25	6.4167	77	17	19.25	4.25
	1	81725581	28118583	1	1	1	1	0	0	0	1	1476	1337.37	35.1	0	1	1	1	0	1	0	6	2	3	0.3617	1	1	0	0	1	0	0	1	0	0	0	4	4	0.075491	17.5	4.5	17.5	70	18	17.5	4.5
0	1	68627846	28118583	0	1	1	0	0	0	0	1	886	944.459	81.1	1	1	1	1	0	1	1	6	3	2	0.5	1	1	1	0	1	0	0	1	0	0	0	1	17	0.045295	42	17	2.4706	42	17	42	17
1	1	68627846	28118583	0	1	1	0	0	0	0	1	1281	1281.35	49.3	1	1	1	1	0	1	1	5	3	1.6667	0.38298	1	1	0	0	1	0	0	1	0	0	0	4	12	0.08304	19.25	4.25	6.4167	77	17	19.25	4.25
	1	68627846	28118583	0	1	1	0	0	0	0	1	1597	1688.39	225	0	1	1	1	0	1	1	5	3	1.6667	0.48936	1	1	0	0	1	0	0	1	0	0	0	4	4	0.075491	17.5	4.5	17.5	70	18	17.5	4.5
0	1	55218484	28118583	1	1	1	1	0	0	0	1	982	1034.41	81.1	1	1	1	1	0	1	1	6	4	1.5	0.5	1	1	1	0	1	0	0	1	0	0	0	1	17	0.045295	42	17	2.4706	42	17	42	17
1	1	55218484	28118583	1	1	1	1	0	0	0	1	1440	1377.33	47.2	1	1	1	1	0	1	1	9	4	2.25	0.34043	1	1	0	0	1	0	0	1	0	0	0	4	12	0.08304	19.25	4.25	6.4167	77	17	19.25	4.25
	1	55218484	28118583	1	1	1	1	0	0	0	1	1784	1784.38	26.1	0	1	1	1	0	1	1	6	4	1.5	0.46809	1	1	0	0	1	0	0	1	0	0	0	4	4	0.075491	17.5	4.5	17.5	70	18	17.5	4.5
0	1	86578116	86667788		0	1	1	0	0	1	0		464.434		1	0	0	1	1	1	0	10	3	3.3333	0.36	0	1	0	1	1	0	1	1	0	0	0	2	1	0.18234	10	1.5	20	20	3	10	1.5
0	1	41118282	86667788	1	1	1	1	0	0	1	0	690	691.431	66.1	1	0	0	1	0	0	0	3	2	1.5	0.5	0	1	0	1	1	0	1	1	0	0	0	2	1	0.18234	10	1.5	20	20	3	10	1.5
1	1	41118282	86667788	1	0	1	0	0	0	0	1	1105	1106.36	29.3	0	1	1	1	0	0	0	3	2	1.5	0.5	1	1	0	0	1	1	1	1	0	1	1	1	1	0.14587	16	3	16	16	3	16	3
	1	41118282	86667788	1	1	1	1	0	0	0	1	1489	1488.38	26.1	0	1	1	1	1	0	0	4	1	4	0.26596	1	1	1	0	1	0	1	1	0	0	0	1	1	0.2188	24	2	24	24	2	24	2
1	1	41118282	86667788	1	0		0	1	0	1	0	363	364.361	29.3	0	1	1	1	0	0	0	3	2	1.5	0.5	1	1	0	0	1	1	1	1	0	1	1	1	1	0.14587	16	3	16	16	3	16	3
	1	41118282	86667788	1	1		1	0	0	0	1	745	746.386	25.1	0	1	1	1	1	0	0	4	1	4	0.26596	1	1	1	0	1	0	1	1	0	0	0	1	1	0.2188	24	2	24	24	2	24	2
0	1	82278656	67875158	0	1	1	0	1	0	1	0	355	356.387	66.1	0	0	1	0	0	1	1	6	2	3	0.45	0	1	0	1	1	0	0	1	0	0	0	1	0	0.081778	15	6		15	6	15	6
1	1	82278656	67875158	1	1		1	1	1	1	0	317	101.296	74.4	1	1	0	1	0	1	0	5	2	2.5	0.38298	1	1	0	0	1	1	0	0	0	0	1	2	1	0.10359	9.5	3.5	19	19	7	9.5	3.5
0	1	82536425	87217632	0	0	1	1	0	0	1	0	739	739.524	66.1	1	1	1	1	0	1	0	4	4	1	0.48	1	1	0	1	1	1	0	0	0	0	0	4	8	0.10613	18	4.75	9	72	19	18	4.75
1	1	82536425	87217632	1	1		0	0	0	1	0	101	85.423	29.3	1	1	1	1	0	1	0	6	3	2	0.31915	1	1	0	0	1	1	0	1	0	0	0	3	16	0.22405	50.6667	6.3333	9.5	152	19	50.6667	6.3333
	1	82536425	87217632	1	1		0	0	0	0	1	491	879.398	25.1	0	1	1	1	0	1	1	3	1	3	0.6383	1	1	0	0	1	0	0	1	0	0	1	3	3	0.1076	24.3333	7.3333	24.3333	73	22	24.3333	7.3333
0	1	24311618	87217632	1	1	1	1	1	1	1	0	222	223.5	66.1	1	1	1	0	0	1	1	5	2	2.5	0.41	1	1	0	1	1	1	0	0	0	0	0	4	8	0.10613	18	4.75	9	72	19	18	4.75
1	1	24311618	87217632	1	1	1	1	0	0	0	1	611	611.438	49.3	1	1	1	1	0	1	1	4	2	2	0.53191	1	1	0	0	1	1	0	1	0	0	0	3	16	0.22405	50.6667	6.3333	9.5	152	19	50.6667	6.3333
	1	24311618	87217632	1	1	1	0	0	0	0	1	1014	1016.58	25.1	0	1	1	1	1	1	1	4	1	4	0.55319	1	1	0	0	1	0	0	1	0	0	1	3	3	0.1076	24.3333	7.3333	24.3333	73	22	24.3333	7.3333
0	1	24846721	87217632	1	1	1	1	0	0	0	1	1030	1031.52	66.1	1	1	1	1	0	1	0	4	3	1.3333	0.48	1	1	0	1	1	1	0	0	0	0	0	4	8	0.10613	18	4.75	9	72	19	18	4.75
1	1	24846721	87217632	1	1	1	1	0	0	0	1	1469	1419.47	13.7	1	1	1	1	0	1	0	4	2	2	0.37234	1	1	0	0	1	1	0	1	0	0	0	3	16	0.22405	50.6667	6.3333	9.5	152	19	50.6667	6.3333
	1	24846721	87217632	1	1	1	1	0	0	0	1		2214.42		0	1	1	1	0	0	1	4	2	2	0.45745	1	1	0	0	1	0	0	1	0	0	1	3	3	0.1076	24.3333	7.3333	24.3333	73	22	24.3333	7.3333
0	1	41556748	87217632	1	1	1	1	1	1	1	0	97	99.4586	66.1	1	1	1	1	0	1	1	8	5	1.6	0.43	1	1	0	1	1	1	0	0	0	0	0	4	8	0.10613	18	4.75	9	72	19	18	4.75
1	1	41556748	87217632	1	1	1	1	0	0	0	1	487	487.466	49.3	1	1	1	1	0	1	1	6	4	1.5	0.44681	1	1	0	0	1	1	0	1	0	0	0	3	16	0.22405	50.6667	6.3333	9.5	152	19	50.6667	6.3333
	1	41556748	87217632	1	1	1	1	0	0	0	1	893	891.558	25.1	0	1	1	1	0	1	1	8	3	2.6667	0.39362	1	1	0	0	1	0	0	1	0	0	1	3	3	0.1076	24.3333	7.3333	24.3333	73	22	24.3333	7.3333
1	1	56882342	87217632	1	1		1	1	1	1	0		161.392		1	1	1	1	1	1	0	7	1	7	0.28723	1	1	0	0	1	1	0	1	0	0	0	3	16	0.22405	50.6667	6.3333	9.5	152	19	50.6667	6.3333
	1	56882342	87217632	1	1		0	1	1	1	0	419	418.561	25.1	0	1	1	1	0	1	0	6	2	3	0.39362	1	1	0	0	1	0	0	1	0	0	1	3	3	0.1076	24.3333	7.3333	24.3333	73	22	24.3333	7.3333
0	1	16346234	87217632	0	1	1	1	0	0	1	0	706	706.606	66.1	1	1	1	0	0	1	1	9	4	2.25	0.4	1	1	0	1	1	1	0	0	0	0	0	4	8	0.10613	18	4.75	9	72	19	18	4.75
1	1	16346234	87217632	0	1	1	0	0	0	0	1	1145	1096.43	13.7	1	1	1	1	0	1	0	9	3	3	0.26596	1	1	0	0	1	1	0	1	0	0	0	3	16	0.22405	50.6667	6.3333	9.5	152	19	50.6667	6.3333
0	1	16346234	87217632	0	0	1	1	0	0	1	0	710	710.614	66.1	1	1	1	0	0	1	1	9	4	2.25	0.4	1	1	0	1	1	1	0	0	0	0	0	4	8	0.10613	18	4.75	9	72	19	18	4.75
1	1	16346234	87217632	0	1	1	0	0	0	0	1	1100	1100.44	49.3	1	1	1	1	0	1	0	9	3	3	0.26596	1	1	0	0	1	1	0	1	0	0	0	3	16	0.22405	50.6667	6.3333	9.5	152	19	50.6667	6.3333
	1	16346234	87217632	0	1	1	0	0	0	0	1	1508	1508.53	26.1	0	1	1	1	0	1	1	5	2	2.5	0.46809	1	1	0	0	1	0	0	1	0	0	1	3	3	0.1076	24.3333	7.3333	24.3333	73	22	24.3333	7.3333
1	1	66466761	87217632	0	1		1	0	0	0	1	892	941.54	49.3	1	1	1	1	0	1	1	5	2	2.5	0.48936	1	1	0	0	1	1	0	1	0	0	0	3	16	0.22405	50.6667	6.3333	9.5	152	19	50.6667	6.3333
	1	66466761	87217632	0	1		1	0	0	0	1		1686.41		0	1	1	1	0	1	1	5	2	2.5	0.48936	1	1	0	0	1	0	0	1	0	0	1	3	3	0.1076	24.3333	7.3333	24.3333	73	22	24.3333	7.3333
0	1	31388558	87217632	1	1	1	1	1	0	1	0		104.591		1	1	1	1	0	1	1	3	2	1.5	0.6	1	1	0	1	1	1	0	0	0	0	0	4	8	0.10613	18	4.75	9	72	19	18	4.75
1	1	31388558	87217632	1	1	1	1	1	0	0	1	493	494.372	49.3	1	1	1	1	0	1	1	3	2	1.5	0.55319	1	1	0	0	1	1	0	1	0	0	0	3	16	0.22405	50.6667	6.3333	9.5	152	19	50.6667	6.3333
	1	31388558	87217632	1	1	1	1	0	0	0	1	902	900.56	26.1	0	1	1	1	1	1	1	4	1	4	0.52128	1	1	0	0	1	0	0	1	0	0	1	3	3	0.1076	24.3333	7.3333	24.3333	73	22	24.3333	7.3333
0	1	36778461	87217632	1	0	1	1	0	0	1	0	241	242.465	66.1	1	1	1	1	0	1	1	8	3	2.6667	0.37	1	1	0	1	1	1	0	0	0	0	0	4	8	0.10613	18	4.75	9	72	19	18	4.75
1	1	36778461	87217632	1	0	1	0	0	0	0	1	697	761.477	51.3	1	1	1	1	0	1	1	5	2	2.5	0.45745	1	1	0	0	1	1	0	1	0	0	0	3	16	0.22405	50.6667	6.3333	9.5	152	19	50.6667	6.3333
	1	36778461	87217632	1	0	1	1	0	0	0	1		1416.45		0	1	1	1	0	1	1	4	2	2	0.52128	1	1	0	0	1	0	0	1	0	0	1	3	3	0.1076	24.3333	7.3333	24.3333	73	22	24.3333	7.3333
0	1	36778461	87217632	1	1	1	1	0	0	0	1	1185	1186.53	66.1	1	1	1	1	0	1	1	8	3	2.6667	0.37	1	1	0	1	1	1	0	0	0	0	0	4	8	0.10613	18	4.75	9	72	19	18	4.75
1	1	36778461	87217632	1	1	1	1	0	0	0	1	1819	1816.38	94.5	1	1	1	1	0	1	1	5	2	2.5	0.45745	1	1	0	0	1	1	0	1	0	0	0	3	16	0.22405	50.6667	6.3333	9.5	152	19	50.6667	6.3333
	1	36778461	87217632	1	0	1	1	0	0	0	1	2118	2368.39	35.1	0	1	1	1	0	1	1	4	2	2	0.52128	1	1	0	0	1	0	0	1	0	0	1	3	3	0.1076	24.3333	7.3333	24.3333	73	22	24.3333	7.3333
1	1	63681417	87217632	0	1		0	0	0	0	1	1120	1170.53	49.3	1	1	1	1	0	1	0	2	2	1	0.53191	1	1	0	0	1	1	0	1	0	0	0	3	16	0.22405	50.6667	6.3333	9.5	152	19	50.6667	6.3333
1	1	66677658	87217632	0	0		1	0	0	0	1	279	280.406	49.3	1	1	1	1	1	1	1	7	2	3.5	0.52128	1	1	0	0	1	1	0	1	0	0	0	3	16	0.22405	50.6667	6.3333	9.5	152	19	50.6667	6.3333
0	1	77464452	36248633	0	0	1	0	0	0	0	1		1333.62		1	1	1	1	0	1	0	5	3	1.6667	0.39	1	1	1	0	1	0	1	0	0	0	1	3	4	0.043569	8.6667	1.6667	6.5	26	5	8.6667	1.6667
1	1	77464452	36248633	0	0	1	0	0	0	1	0	1795	1718.48	50.3	1	1	1	1	1	1	0	7	2	3.5	0.2766	1	1	0	1	1	0	0	1	0	0	0	2	3	0.056975	17	6	11.3333	34	12	17	6
	1	77464452	36248633	0	0	1	1	0	0	0	1	2263	2127.45	35.1	0	1	1	1	1	1	0	7	2	3.5	0.34043	1	1	0	0	1	0	0	1	0	0	1	2	2	0.063678	19	5	19	38	10	19	5
0	1	31253271	36248633	1	1	1	0	1	1	1	0		92.6093		1	1	1	1	0	1	0	3	3	1	0.45	1	1	1	0	1	0	1	0	0	0	1	3	4	0.043569	8.6667	1.6667	6.5	26	5	8.6667	1.6667
0	1	45586147	36248633	0	0	1	1	0	0	1	0	848	849.574	66.1	1	0	1	0	0	1	1	6	4	1.5	0.5	1	1	1	0	1	0	1	0	0	0	1	3	4	0.043569	8.6667	1.6667	6.5	26	5	8.6667	1.6667
1	1	45586147	36248633	0	0	1	1	0	0	0	1	1253	1368.48	29.3	1	1	1	1	1	1	1	10	2	5	0.3617	1	1	0	1	1	0	0	1	0	0	0	2	3	0.056975	17	6	11.3333	34	12	17	6
	1	45586147	36248633	0	0	1	1	0	0	0	1	1779	2030.51	35.1	0	1	1	1	0	0	1	3	4	0.75	0.57447	1	1	0	0	1	0	0	1	0	0	1	2	2	0.063678	19	5	19	38	10	19	5
0	1	86584481	36248633	1	1	1	1	1	1	1	0	220	221.562	66.1	1	0	1	1	0	1	1	5	3	1.6667	0.52	1	1	1	0	1	0	1	0	0	0	1	3	4	0.043569	8.6667	1.6667	6.5	26	5	8.6667	1.6667
1	1	86584481	36248633	1	0	1	1	0	0	1	0	681	626.396	50.3	1	1	1	1	0	1	1	4	3	1.3333	0.55319	1	1	0	1	1	0	0	1	0	0	0	2	3	0.056975	17	6	11.3333	34	12	17	6
0	1	74411466	36248633	0	0	1	0	0	0	0	0	1394	1395.59	66.1	1	1	1	1	0	1	0	5	3	1.6667	0.37	1	1	1	0	1	0	1	0	0	0	1	3	4	0.043569	8.6667	1.6667	6.5	26	5	8.6667	1.6667
1	1	74411466	36248633	0	0	1	0	0	0	0	1	1799	1914.49	29.3	1	1	1	1	0	1	0	3	2	1.5	0.45745	1	1	0	1	1	0	0	1	0	0	0	2	3	0.056975	17	6	11.3333	34	12	17	6
	1	74411466	36248633	0	1	1	0	0	0	0	1	2189	2189.46	25.1	0	1	1	1	0	1	0	8	3	2.6667	0.28723	1	1	0	0	1	0	0	1	0	0	1	2	2	0.063678	19	5	19	38	10	19	5
	1	74411466	36248633	1	0		0	0	0	0	1	748	999.505	35.1	0	1	1	1	0	1	0	8	3	2.6667	0.28723	1	1	0	0	1	0	0	1	0	0	1	2	2	0.063678	19	5	19	38	10	19	5
1	1	74758758	27342785	0	1		1	1	0	1	0	408	405.341	29.3	1	1	1	1	1	1	0	11	2	5.5	0.31915	1	1	0	0	1	0	0	1	0	0	1	2	2	0.07591	10.5	2	10.5	21	4	10.5	2
	1	74758758	27342785	0	0		0	0	0	0	1	792	792.418	25.1	0	1	1	1	1	1	1	10	2	5	0.39362	1	1	0	0	1	0	0	1	0	0	0	2	2	0.1229	17	3	17	34	6	17	3
0	1	42181524	27342785	1	1	1	0	0	0	0	1		1656.49		1	1	1	1	0	1	1	7	3	2.3333	0.42	1	1	1	0	1	0	0	1	0	0	1	1	3	0.10121	28	5	9.3333	28	5	28	5
1	1	42181524	27342785	0	0		0	0	0	0	0	271	634.913	29.3	1	1	1	1	0	1	1	6	2	3	0.43617	1	1	0	0	1	0	0	1	0	0	1	2	2	0.07591	10.5	2	10.5	21	4	10.5	2
0	1	16841146	27342785	0	1	1	1	0	0	0	1	1058	1059.53	66.1	1	1	1	1	0	1	1	7	4	1.75	0.6	1	1	1	0	1	0	0	1	0	0	1	1	3	0.10121	28	5	9.3333	28	5	28	5
1	1	16841146	27342785	0	1	1	1	0	0	0	1	1518	1832.92	56.4	1	1	1	0	0	1	1	7	4	1.75	0.57447	1	1	0	0	1	0	0	1	0	0	1	2	2	0.07591	10.5	2	10.5	21	4	10.5	2
	1	16841146	27342785	0	0	1	1	0	0	0	1		2232.41		0	1	1	1	0	1	1	8	4	2	0.55319	1	1	0	0	1	0	0	1	0	0	0	2	2	0.1229	17	3	17	34	6	17	3
	1	16841146	27342785	0	1		1	1	0	1	0	353	354.409	25.1	0	1	1	1	0	1	1	8	4	2	0.55319	1	1	0	0	1	0	0	1	0	0	0	2	2	0.1229	17	3	17	34	6	17	3
0	1	31865774	27342785		0	1	1	0	0	1	0			66.1	1	1	1	1	0	1	1	6	2	3	0.4	1	1	1	0	1	0	0	1	0	0	1	1	3	0.10121	28	5	9.3333	28	5	28	5
	1	62742553	27342785	0	0		0	1	1	1	0	137	136.399	25.1	0	1	1	1	0	1	1	3	2	1.5	0.6383	1	1	0	0	1	0	0	1	0	0	0	2	2	0.1229	17	3	17	34	6	17	3
0	1	66252873	38436158	1	1	1	0	0	0	0	0	1178	1179.62	66.1	1	1	1	1	0	1	0	6	3	2	0.43	1	1	1	0	1	0	0	1	0	0	0	5	1	0.064715	14.3333	4.5	86	86	27	14.3333	4.5
1	1	66252873	38436158	1	0	1	1	0	0	0	1	1566	1564.36	49.3	1	1	1	1	1	1	0	9	2	4.5	0.26596	1	1	1	0	1	0	0	1	0	0	0	5	2	0.092558	20.5	4.8333	61.5	123	29	20.5	4.8333
	1	66252873	38436158	1	0	1	0	0	0	0	1	1968	1969.58	25.1	0	1	1	1	0	1	1	6	2	3	0.43617	1	1	0	0	1	0	0	1	0	0	0	5	2	0.076003	16.8333	5	50.5	101	30	16.8333	5
1	1	66252873	38436158	1	1		1	1	1	1	0	65	66.2988	39.4	1	1	1	1	1	1	0	9	2	4.5	0.26596	1	1	1	0	1	0	0	1	0	0	0	5	2	0.092558	20.5	4.8333	61.5	123	29	20.5	4.8333
0	1	86783663	38436158	0	1	1	0	1	0	1	0		245.652		1	1	1	1	0	1	0	4	3	1.3333	0.43	1	1	1	0	1	0	0	1	0	0	0	5	1	0.064715	14.3333	4.5	86	86	27	14.3333	4.5
0	1	37645865	38436158	0	1	1	1	1	1	1	0	48	49.6715	66.1	1	1	1	1	0	1	0	7	3	2.3333	0.38	1	1	1	0	1	0	0	1	0	0	0	5	1	0.064715	14.3333	4.5	86	86	27	14.3333	4.5
0	1	46123167	38436158	0	1	1	0	0	0	1	0	272	273.694	66.1	1	1	1	1	0	1	0	8	3	2.6667	0.29	1	1	1	0	1	0	0	1	0	0	0	5	1	0.064715	14.3333	4.5	86	86	27	14.3333	4.5
1	1	46123167	38436158	0	0	1	0	0	0	0	1	793	657.424	0	1	1	1	1	0	1	0	4	3	1.3333	0.42553	1	1	1	0	1	0	0	1	0	0	0	5	2	0.092558	20.5	4.8333	61.5	123	29	20.5	4.8333
	1	46123167	38436158	0	1	1	0	0	0	0	1	1062	1063.6	25.1	0	1	1	1	0	1	0	5	3	1.6667	0.31915	1	1	0	0	1	0	0	1	0	0	0	5	2	0.076003	16.8333	5	50.5	101	30	16.8333	5
0	1	46123167	38436158	1	1	1	0	0	0	1	0		227.683		1	1	1	1	0	1	0	8	3	2.6667	0.29	1	1	1	0	1	0	0	1	0	0	0	5	1	0.064715	14.3333	4.5	86	86	27	14.3333	4.5
0	1	46123167	38436158	0	0	1	0	0	0	1	0	962	963.697	66.1	1	1	1	1	0	1	0	8	3	2.6667	0.29	1	1	1	0	1	0	0	1	0	0	0	5	1	0.064715	14.3333	4.5	86	86	27	14.3333	4.5
0	1	18832882	38436158	1	1	1	1	0	0	1	0	361	362.706	66.1	1	1	1	1	0	1	0	4	4	1	0.44	1	1	1	0	1	0	0	1	0	0	0	5	1	0.064715	14.3333	4.5	86	86	27	14.3333	4.5
	1	18832882	38436158	1	1		0	0	0	0	1	1679	2065.41	25.1	0	1	1	1	0	1	0	5	4	1.25	0.41489	1	1	0	0	1	0	0	1	0	0	0	5	2	0.076003	16.8333	5	50.5	101	30	16.8333	5
	1	18832882	38436158	1	1		0	1	0	1	0	102	488.431	25.1	0	1	1	1	0	1	0	5	4	1.25	0.41489	1	1	0	0	1	0	0	1	0	0	0	5	2	0.076003	16.8333	5	50.5	101	30	16.8333	5
0	1	65664357	38436158	1	1	1	1	0	0	1	0	608	609.639	66.1	1	1	1	1	0	1	0	3	2	1.5	0.53	1	1	1	0	1	0	0	1	0	0	0	5	1	0.064715	14.3333	4.5	86	86	27	14.3333	4.5
0	1	34465872	38436158	0	1	1	0	1	0	1	0	605	606.734	66.1	1	1	1	1	0	1	0	6	3	2	0.34	1	1	1	0	1	0	0	1	0	0	0	5	1	0.064715	14.3333	4.5	86	86	27	14.3333	4.5
1	1	34465872	38436158	0	1	1	0	0	0	0	1		990.425		1	1	1	1	1	1	0	7	2	3.5	0.19149	1	1	1	0	1	0	0	1	0	0	0	5	2	0.092558	20.5	4.8333	61.5	123	29	20.5	4.8333
0	1	34465872	38436158											66.1	1	1	1	1	0	1	0	6	3	2	0.34	1	1	1	0	1	0	0	1	0	0	0	5	1	0.064715	14.3333	4.5	86	86	27	14.3333	4.5
1	1	34465872	38436158	1	1		1	1	1	1	0	340	133.441	37.1	1	1	1	1	1	1	0	7	2	3.5	0.19149	1	1	1	0	1	0	0	1	0	0	0	5	2	0.092558	20.5	4.8333	61.5	123	29	20.5	4.8333
	1	34465872	38436158	1	1		0	0	0	0	1	540	550.446	25.1	0	1	1	1	0	1	0	3	2	1.5	0.5	1	1	0	0	1	0	0	1	0	0	0	5	2	0.076003	16.8333	5	50.5	101	30	16.8333	5
0	1	24473384	38436158	0	1	1	0	1	0	1	0	494	507.425	66.1	1	1	1	1	0	1	0	5	2	2.5	0.35	1	1	1	0	1	0	0	1	0	0	0	5	1	0.064715	14.3333	4.5	86	86	27	14.3333	4.5
1	1	24473384	38436158	0	1	1	0	0	0	0	1	1012	879.519	0	1	1	1	1	0	1	0	5	2	2.5	0.28723	1	1	1	0	1	0	0	1	0	0	0	5	2	0.092558	20.5	4.8333	61.5	123	29	20.5	4.8333
	1	24473384	38436158	0	1	1	0	0	0	0	1	1285	1288.5	25.1	0	1	1	1	0	1	0	5	2	2.5	0.28723	1	1	0	0	1	0	0	1	0	0	0	5	2	0.076003	16.8333	5	50.5	101	30	16.8333	5
	1	13651148	38436158	1			0					1753		35.1	0	1	1	1	0	1	0	3	1	3	0.48936	1	1	0	0	1	0	0	1	0	0	0	5	2	0.076003	16.8333	5	50.5	101	30	16.8333	5
1	1	48424842	38436158	0	1		0	1	1	1	0	374	130.377	74.4	1	1	1	1	0	1	0	6	2	3	0.30851	1	1	1	0	1	0	0	1	0	0	0	5	2	0.092558	20.5	4.8333	61.5	123	29	20.5	4.8333
	1	48424842	38436158	0	1		0	0	0	1	0	535	920.416	25.1	0	1	1	1	0	1	0	6	2	3	0.32979	1	1	0	0	1	0	0	1	0	0	0	5	2	0.076003	16.8333	5	50.5	101	30	16.8333	5
1	1	22643386	38436158	0	1		0	1	0	1	0	319	322.315	39.4	1	1	1	1	0	1	0	4	2	2	0.42553	1	1	1	0	1	0	0	1	0	0	0	5	2	0.092558	20.5	4.8333	61.5	123	29	20.5	4.8333
	1	22643386	38436158	0	1		0	0	0	1	0	725	736.465	25.1	0	1	1	1	0	1	0	4	2	2	0.44681	1	1	0	0	1	0	0	1	0	0	0	5	2	0.076003	16.8333	5	50.5	101	30	16.8333	5
1	1	68736282	38436158	0	0		0	0	0	0	1			49.3	1	1	1	1	1	1	0	4	1	4	0.28723	1	1	1	0	1	0	0	1	0	0	0	5	2	0.092558	20.5	4.8333	61.5	123	29	20.5	4.8333
	1	68736282	38436158	0			0							14.2	0	1	1	1	1	1	0	4	1	4	0.25532	1	1	0	0	1	0	0	1	0	0	0	5	2	0.076003	16.8333	5	50.5	101	30	16.8333	5
1	1	65833764	38436158	0	1		1	0	0	0	1	802	877.612	13.7	1	1	1	1	1	1	0	10	3	3.3333	0.29787	1	1	1	0	1	0	0	1	0	0	0	5	2	0.092558	20.5	4.8333	61.5	123	29	20.5	4.8333
1	1	65833764	38436158	1	1		1	1	0	1	0		167.588		1	1	1	1	1	1	0	10	3	3.3333	0.29787	1	1	1	0	1	0	0	1	0	0	0	5	2	0.092558	20.5	4.8333	61.5	123	29	20.5	4.8333
	1	61616771	36236123	1	1		1	0	0	0	1	317	395.361	25.1	1	1	1	1	1	1	0	7	2	3.5	0.26596	1	1	0	1	1	1	0	1	0	0	0	2	1	0.12219	11.5	3	23	23	6	11.5	3
0	1	28564255	36236123	1	1	1	1	1	0	1	0	516	516.36	65.6	1	1	0	1	0	1	0	4	2	2	0.34	1	1	1	0	0	0	0	0	0	0	0	3	1	0.11688	7.3333	2.3333	22	22	7	7.3333	2.3333
1	1	28564255	36236123	1	1	1	1	0	0	0	1	1150	1022.45	103.9	0	1	1	1	0	1	0	5	2	2.5	0.26596	1	1	0	0	1	0	0	1	0	0	0	2	1	0.11156	10.5	3	21	21	6	10.5	3
	1	28564255	36236123	1	1	1	1	0	0	0	1	1385	1383.37	0	1	1	1	1	0	1	0	4	2	2	0.44681	1	1	0	1	1	1	0	1	0	0	0	2	1	0.12219	11.5	3	23	23	6	11.5	3
0	1	45176313	36236123	0	1	1	0	0	0	1	0		586.384		1	0	0	1	0	1	0	4	3	1.3333	0.36	1	1	1	0	0	0	0	0	0	0	0	3	1	0.11688	7.3333	2.3333	22	22	7	7.3333	2.3333
0	1	61435611	36236123	0	1	1	1	0	0	1	0	968	968.404	65.6	1	1	0	1	0	1	0	4	2	2	0.41	1	1	1	0	0	0	0	0	0	0	0	3	1	0.11688	7.3333	2.3333	22	22	7	7.3333	2.3333
1	1	61435611	36236123	0	0	1	0	0	0	0	1	1475	1474.43	1	0	1	1	1	0	1	0	6	3	2	0.37234	1	1	0	0	1	0	0	1	0	0	0	2	1	0.11156	10.5	3	21	21	6	10.5	3
	1	61435611	36236123	0	1	1	1	0	0	0	1	1836	1835.39	0	1	1	1	1	0	1	0	6	2	3	0.3617	1	1	0	1	1	1	0	1	0	0	0	2	1	0.12219	11.5	3	23	23	6	11.5	3
	1	61435611	36236123	1	1		1	0	0	0	1	313	391.391	25.1	1	1	1	1	0	1	0	6	2	3	0.3617	1	1	0	1	1	1	0	1	0	0	0	2	1	0.12219	11.5	3	23	23	6	11.5	3
0	1	83688248	78674788	0	1	1	1	1	0	1	0	343	344.538	63.3	1	0	0	0	0	1	1	7	4	1.75	0.41	0	0	0	0	1	0	0	1	0	0	0	1	0	0.041667	9	3		9	3	9	3
1	1	83688248	78674788	0	1	1	1	0	0	0	1	839	840.376	2	1	1	1	0	0	1	1	7	3	2.3333	0.34043	1	0	0	0	1	1	0	1	0	0	0	1	0	0.050926	11	3		11	3	11	3
	1	83688248	78674788	0	1	1	0	0	0	0	1	1206	1214.5	0	0	1	1	0	0	1	1	8	3	2.6667	0.2766	1	0	0	0	1	0	0	1	0	0	0	1	0	0.060186	13	3		13	3	13	3
0	1	83688248	78674788	0	1	1	1	0	0	1	0	1379	1380.54	63.3	1	0	0	0	0	1	1	7	4	1.75	0.41	0	0	0	0	1	0	0	1	0	0	0	1	0	0.041667	9	3		9	3	9	3
1	1	83688248	78674788	0	1	1	1	0	0	0	1	1875	1876.39	2	1	1	1	0	0	1	1	7	3	2.3333	0.34043	1	0	0	0	1	1	0	1	0	0	0	1	0	0.050926	11	3		11	3	11	3
	1	83688248	78674788	0	1	1	1	0	0	0	1	2242	2252.53	0	0	1	1	0	0	1	1	8	3	2.6667	0.2766	1	0	0	0	1	0	0	1	0	0	0	1	0	0.060186	13	3		13	3	13	3
	1	83688248	78674788	0	1		1	1	0	1	0	319	329.547	0	0	1	1	0	0	1	1	8	3	2.6667	0.2766	1	0	0	0	1	0	0	1	0	0	0	1	0	0.060186	13	3		13	3	13	3
1	1	44357786	51787714	0	0		0	0	0	1	0	372	377.634	2	0	1	1	0	1	1	1	7	2	3.5	0.41489	1	1	0	0	1	0	1	1	0	0	1	1	0	0.099229	15	3		15	3	15	3
1	1	44357786	51787714	0	1		0	1	0	1	0	156	164.376	1	0	1	1	0	1	1	1	7	2	3.5	0.41489	1	1	0	0	1	0	1	1	0	0	1	1	0	0.099229	15	3		15	3	15	3
	1	44357786	51787714	0	1		0	1	0	1	0	521	521.399	0	0	1	1	0	0	1	1	6	3	2	0.42553	1	1	0	0	0	0	0	0	0	0	0	1	0	0.072768	11	3		11	3	11	3
1	1	32388312	51787714	1	1		0	1	0	1	0		141.357		0	1	1	0	0	1	0	3	1	3	0.42553	1	1	0	0	1	0	1	1	0	0	1	1	0	0.099229	15	3		15	3	15	3
	1	32388312	51787714	1	1		0	0	0	1	0	427	504.406	25.1	0	1	1	0	1	1	0	4	1	4	0.44681	1	1	0	0	0	0	0	0	0	0	0	1	0	0.072768	11	3		11	3	11	3
0	1	45274874	51787714	1	0	1	0	0	0	1	0	606	607.511	63.3	1	0	1	0	0	1	0	6	3	2	0.3	0	1	0	0	1	0	0	1	0	0	1	1	0	0.10584	16	3		16	3	16	3
1	1	45274874	51787714	1	1	1	0	0	0	0	1		1108.62		0	1	1	0	0	1	0	6	2	3	0.39362	1	1	0	0	1	0	1	1	0	0	1	1	0	0.099229	15	3		15	3	15	3
0	1	76216162	18788617	1	1	1	1	1	1	1	0	68	69.5713	63.3	1	0	0	0	0	1	0	3	3	1	0.44	0	1	0	0	0	0	0	0	0	0	1	1	0	0.13341	16	4		16	4	16	4
1	1	76216162	18788617	1	0	1	0	0	0	0	1	565	568.476	2	0	1	1		0	1	0	3	3	1	0.44	1	1	0	0	1	0	0	1	0	0	1	1	0	0.11674	14	4		14	4	14	4
0	1	68127133	18788617	1	0	1	0	0	0	0	1	828	829.577	63.3	1	0	1	0	0	1	1	8	3	2.6667	0.3	0	1	0	0	0	0	0	0	0	0	1	1	0	0.13341	16	4		16	4	16	4
0	1	18537722	18788617	0	1	1	1	0	0	1	0	849	761.583	8.9	1	0	1	0	0	1	1	3	2	1.5	0.6	0	1	0	0	0	0	0	0	0	0	1	1	0	0.13341	16	4		16	4	16	4
1	1	18537722	18788617	0	0	1	0	0	0	0	1	1395	1282.56	97.8	0	1	1	0	0	1	1	3	1	3	0.57447	1	1	0	0	1	0	0	1	0	0	1	1	0	0.11674	14	4		14	4	14	4
	1	18537722	18788617	0	1	1	1	0	0	0	1		1629.59		0	1	1	0	0	1	1	3	2	1.5	0.45745	1	1	0	0	1	0	0	1	0	0	0	1	0	0.091722	11	3		11	3	11	3
1	1	11624112	84421675	1	0		0	0	0	0	1	612	613.37	2	0	1	1	1	1	1	1	4	1	4	0.52128	1	1	0	0	1	0	0	1	0	0	1	1	3	0.065504	18	5	6	18	5	18	5
1	1	57882222	84421675	1	0		1	0	0	0	1	1159	1165.5	2	0	1	1	1	0	1	1	9	4	2.25	0.39362	1	1	0	0	1	0	0	1	0	0	1	1	3	0.065504	18	5	6	18	5	18	5
	1	57882222	84421675	1			1					1638	1525.51	29.3	0	1	1	1	0	1	1	9	4	2.25	0.39362	1	1	0	0	1	0	0	1	0	1	0	1	1	0.061865	17	5	17	17	5	17	5
1	1	57882222	84421675	0	0		0	0	0	0	1	1261	1275.48	1	0	1	1	1	0	1	1	9	4	2.25	0.39362	1	1	0	0	1	0	0	1	0	0	1	1	3	0.065504	18	5	6	18	5	18	5
	1	57882222	84421675	0	0		0	0	0	0	1		1944.47		0	1	1	1	0	1	1	9	4	2.25	0.39362	1	1	0	0	1	0	0	1	0	1	0	1	1	0.061865	17	5	17	17	5	17	5
1	1	57882222	84421675	0	0		1	0	0	0	1	1170	1177.62	1	0	1	1	1	0	1	1	9	4	2.25	0.39362	1	1	0	0	1	0	0	1	0	0	1	1	3	0.065504	18	5	6	18	5	18	5
	1	57882222	84421675	0	0		0	0	0	0	1		1853.48		0	1	1	1	0	1	1	9	4	2.25	0.39362	1	1	0	0	1	0	0	1	0	1	0	1	1	0.061865	17	5	17	17	5	17	5
	1	76461452	84421675	0	1		1	1	1	1	0	147	148.472	0	0	1	1	0	0	1	1	3	2	1.5	0.60638	1	1	0	0	1	0	0	1	0	1	0	1	1	0.061865	17	5	17	17	5	17	5
1	1	14245638	54853545	1	1		1	0	0	0	0	1411	1276.53	103.9	1	1	1	1	0	1	1	6	3	2	0.40426	1	1	0	0	1	0	0	1	0	0	0	1	0	0.028919	5	4		5	4	5	4
0	1	66728522	54853545	0	1	1	1	1	0	1	0	55	56.5085	63.3	1	1	1	0	0	1	1	5	3	1.6667	0.42	0	1	0	1	0	0	0	0	0	0	1	1	0	0.063623	11	3		11	3	11	3
0	1	66728522	54853545	0	0	1	1	0	0	1	0	903	904.52	63.3	1	1	1	0	0	1	1	5	3	1.6667	0.42	0	1	0	1	0	0	0	0	0	0	1	1	0	0.063623	11	3		11	3	11	3
1	1	66728522	54853545	0	1	1	1	0	0	0	1	1528	1526.53	74.4	1	1	1	0	0	1	1	5	3	1.6667	0.29787	1	1	0	0	1	0	0	1	0	0	0	1	0	0.028919	5	4		5	4	5	4
1	1	81842755	18667718	0	0		0	0	0	1	0		612.541		0	1	1	0	1	1	0	9	1	9	0.25532	1	0	0	0	1	0	0	1	0	0	0	1	0	0.056451	15	3		15	3	15	3
	1	81842755	18667718	0	1		0	0	0	0	1	962	964.557	0	0	1	1	0	0	1	0	8	3	2.6667	0.17021	1	0	0	0	0	0	0	0	0	0	0	1	0	0.056451	15	3		15	3	15	3
	1	77755813	18667718	1	1		0	1	0	1	0	165	170.564	0	0	1	1	0	0	1	0	6	4	1.5	0.24468	1	0	0	0	0	0	0	0	0	0	0	1	0	0.056451	15	3		15	3	15	3
0	1	81186313	18667718	0	0	1	0	0	0	1	0	1202	1234.55	311.7	0	0	0	0	0	0	0	4	2	2	0.22	0	1	0	0	0	0	0	0	0	0	0	0	0	0.090322				24	6
1	1	81186313	18667718	0	0	1	0	0	0	0	1	1730	1765.59	2	0	1	1	0	0	0	0	3	1	3	0.25532	1	0	0	0	1	0	0	1	0	0	0	1	0	0.056451	15	3		15	3	15	3
0	1	81186313	18667718	1	0	1	0	0	0	1	0	1233	1234.56	63.3	0	0	0	0	0	0	0	4	2	2	0.22	0	1	0	0	0	0	0	0	0	0	0	0	0	0.090322				24	6
1	1	81186313	18667718	1	1	1	0	0	0	0	1	1862	1765.6	94.5	0	1	1	0	0	0	0	3	1	3	0.25532	1	0	0	0	1	0	0	1	0	0	0	1	0	0.056451	15	3		15	3	15	3
0	1	25451853	83864623	1	0	1	1	1	0	1	0	255	256.516	63.3	1	1	0	1	0	1	1	9	4	2.25	0.43	0	1	0	1	0	0	0	0	0	0	0	1	2	0.093302	15	3	7.5	15	3	15	3
0	1	33117565	83864623	0	1	1	1	1	1	1	0	30	31.5238	63.3	1	1	0	1	0	1	1	4	2	2	0.58	0	1	0	1	0	0	0	0	0	0	0	1	2	0.093302	15	3	7.5	15	3	15	3
1	1	33117565	83864623	0	1	1	1	1	1	1	0	486	428.319	50.3	1	1	1	1	0	1	0	4	2	2	0.44681	1	0	0	0	1	1	0	1	0	0	0	1	2	0.093302	15	3	7.5	15	3	15	3
	1	33117565	83864623	0	1	1	1	0	0	0	1	828	830.761	41.2	1	1	1	1	0	1	0	4	2	2	0.40426	1	1	0	0	1	1	0	1	0	0	1	1	2	0.093302	15	3	7.5	15	3	15	3
0	1	63542822	45563853	0	1	1	1	0	0	0	1		788.58		1	1	0	1	0	1	1	6	3	2	0.5	0	1	0	0	0	0	0	0	0	0	1	1	1	0.014288	9	3	9	9	3	9	3
1	1	63542822	45563853	0	1	1	0	0	0	0	1	1243	1181.44	50.3	1	1	1	1	0	1	1	6	2	3	0.3617	1	1	0	0	0	0	0	0	0	0	0	1	1	0.023814	15	3	15	15	3	15	3
	1	63542822	45563853	0	1	1	1	0	0	0	1	1577	1572.98	25.1	1	1	1	1	0	1	0	8	4	2	0.31915	1	1	0	0	1	1	0	1	0	0	1	1	1	0.026989	17	3	17	17	3	17	3
	1	11847813	45563853	1	1		1	0	0	1	0	643	643.997	25.1	1	1	1	1	0	1	1	3	2	1.5	0.60638	1	1	0	0	1	1	0	1	0	0	1	1	1	0.026989	17	3	17	17	3	17	3
0	1	76442415	36212187	0	0	1	0	0	0	1	0	693	694.555	63.3	1	1	0	1	0	1	1	7	4	1.75	0.45	0	1	0	0	1	0	0	1	0	0	0	1	1	0.059251	10	2	10	10	2	10	2
1	1	76442415	36212187	0	0	1	0	0	0	0	1		1090.38		1	1	1	1	0	1	1	12	4	3	0.39362	0	1	0	0	1	0	1	0	0	0	0	1	1	0.071101	12	3	12	12	3	12	3
	1	76442415	36212187	0	0	1	0	0	0	0	1	1512	1511.86	55	1	1	1	1	0	1	1	8	3	2.6667	0.39362	1	1	0	0	1	0	1	1	0	0	0	1	1	0.065176	11	2	11	11	2	11	2
1	1	76442415	36212187	1	1		1	0	0	1	0	421	422.29	29.3	1	1	1	1	0	1	1	12	4	3	0.39362	0	1	0	0	1	0	1	0	0	0	0	1	1	0.071101	12	3	12	12	3	12	3
0	1	26144638	55442135	1	0	1	1	1	1	1	0	90	90.4789	63.3	1	0	0	1	0	1	1	5	3	1.6667	0.52	1	1	0	0	0	0	0	0	0	0	1	0	1	0.055635			14	14	3
1	1	26144638	55442135	1	1	1	1	1	0	1	0	487	486.346	29.3	0	1	1	1	0	1	1	8	3	2.6667	0.37234	1	1	0	0	1	0	0	1	0	0	0	1	1	0.043714	11	3	11	11	3	11	3
	1	26144638	55442135	1	1	1	1	0	0	0	1		875.834		1	1	1	1	1	1	1	7	2	3.5	0.46809	1	1	0	0	0	0	0	0	0	0	0	1	1	0.043714	11	3	11	11	3	11	3
1	1	36876125	28187548	1	1		1	0	0	0	1	1330	1329.38	2	1	1	1	1	0	1	1	5	2	2.5	0.48936	1	1	0	0	1	0	0	1	0	1	1	1	1	0.081715	12	2	12	12	2	12	2
	1	36876125	28187548	1	1		1	0	0	0	1		2013.35		1	1	1	1	0	1	1	4	2	2	0.52128	1	1	0	0	1	0	0	1	0	0	0	1	1	0.12938	19	3	19	19	3	19	3
0	1	85338815	28187548	1	1	1	0	1	0	1	0		337.525		1	0	0	1	0	1	0	8	3	2.6667	0.36	0	1	0	0	1	0	0	1	0	0	1	0	1	0.12257			18	18	3
1	1	85338815	28187548	1	0	1	0	0	0	0	1	972	970.359	97.8	1	1	1	0	1	1	0	9	2	4.5	0.25532	1	1	0	0	1	0	0	1	0	1	1	1	1	0.081715	12	2	12	12	2	12	2
	1	85338815	28187548	1	1	1	0	0	0	0	1	1202	1243.39	0	1	1	1	1	0	1	0	9	3	3	0.31915	1	1	0	0	1	0	0	1	0	0	0	1	1	0.12938	19	3	19	19	3	19	3
0	1	85338815	28187548	0	1	1	0	0	0	1	0		1043.53		1	0	0	1	0	1	0	8	3	2.6667	0.36	0	1	0	0	1	0	0	1	0	0	1	0	1	0.12257			18	18	3
1	1	85338815	28187548	0	1	1	0	0	0	0	1	1676	1676.36	97.8	1	1	1	0	1	1	0	9	2	4.5	0.25532	1	1	0	0	1	0	0	1	0	1	1	1	1	0.081715	12	2	12	12	2	12	2
	1	85338815	28187548	0	0	1	0	0	0	0	1	1910	1949.39	0	1	1	1	1	0	1	0	9	3	3	0.31915	1	1	0	0	1	0	0	1	0	0	0	1	1	0.12938	19	3	19	19	3	19	3
	1	35226737	28187548	1	1		1	0	0	0	1		1338.41		1	1	1	1	0	1	1	6	2	3	0.43617	1	1	0	0	1	0	0	1	0	0	0	1	1	0.12938	19	3	19	19	3	19	3
0	1	57131351	58342536	1	1	1	0	0	0	0	1	1013	1013	63.3					1	0	1	5	1	5	0.3617	0	1	0	0	1	0	1	1	0	0	0	1	1	0.09168	17	5	17	17	5	17	5
1	1	57131351	58342536	1	1	1	0	0	0	0	1	1508	1509.45	2	0	1	1	1	1	0	1	5	1	5	0.3617	1	1	0	0	1	0	0	1	0	0	0	1	1	0.059323	11	4	11	11	4	11	4
	1	57131351	58342536	1	1	1	0	0	0	0	1	1873	1876.5	0	0	1	1	1	0	0	0	5	2	2.5	0.28723	1	1	0	0	0	0	0	0	0	0	0	1	1	0.080894	15	6	15	15	6	15	6
0	1	84154433	63754713	1	1	1	1	1	0	1	0		284.519		1	0	0	1	0	1	1	14	5	2.8	0.36	0	1	0	0	0	0	0	0	0	0	0	1	1	0.086166	15	3	15	15	3	15	3
1	1	84154433	63754713	1	1	1	1	0	0	1	0		652.588		1	1	1	1	0	1	1	4	3	1.3333	0.55319	1	1	0	0	1	0	0	1	0	1	0	1	1	0.022978	4	1	4	4	1	4	1
	1	84154433	63754713	1	1	1	1	0	0	0	1	1097	1020.37	29.3	1	1	1	1	0	1	0	3	3	1	0.56383	1	1	0	0	1	0	0	1	0	0	0	1	1	0.017233	3	1	3	3	1	3	1
0	1	13671131	74118771	1	1	1	1	1	0	1	0	227	227.377	10.9	1	0	1	1	0	1	0	6	4	1.5	0.43	0	1	0	1	1	0	0	1	0	0	1	1	3	0.037443	13	4	4.3333	13	4	13	4
1	1	13671131	74118771	1	1	1	1	0	0	0	1		730.512		0	1	1	1	0	1	0	6	3	2	0.39362	1	1	0	0	1	0	0	1	0	0	1	2	3	0.046084	8	2.5	5.3333	16	5	8	2.5
	1	13671131	74118771	1	1	1	1	0	0	0	1	1244	1083.36	363.2	1	1	1	1	0	1	0	6	3	2	0.39362	1	1	0	0	1	0	0	1	0	1	1	2	3	0.066245	11.5	2.5	7.6667	23	5	11.5	2.5
0	1	13671131	74118771	0	1	1	1	0	0	0	1	954	955.378	10.9	1	0	1	1	0	1	0	6	4	1.5	0.43	0	1	0	1	1	0	0	1	0	0	1	1	3	0.037443	13	4	4.3333	13	4	13	4
1	1	13671131	74118771	0	1	1	1	0	0	0	1	1512	1458.52	97.8	0	1	1	1	0	1	0	6	3	2	0.39362	1	1	0	0	1	0	0	1	0	0	1	2	3	0.046084	8	2.5	5.3333	16	5	8	2.5
	1	13671131	74118771	0	0	1	1	0	0	0	1	1972	2044.47	363.2	1	1	1	1	0	1	0	6	3	2	0.39362	1	1	0	0	1	0	0	1	0	1	1	2	3	0.066245	11.5	2.5	7.6667	23	5	11.5	2.5
0	1	82282568	74118771	1	1	1	1	1	0	1	0	179	179.597	10.9	1	0	1	1	0	1	0	6	3	2	0.51	0	1	0	1	1	0	0	1	0	0	1	1	3	0.037443	13	4	4.3333	13	4	13	4
1	1	82282568	74118771	1	1	1	1	0	0	0	1		691.354		0	1	1	1	0	0	0	5	3	1.6667	0.24468	1	1	0	0	1	0	0	1	0	0	1	2	3	0.046084	8	2.5	5.3333	16	5	8	2.5
	1	82282568	74118771	1	1	1	1	0	0	0	1	1129	1034.33	68.1	1	1	1	1	0	1	1	7	3	2.3333	0.57447	1	1	0	0	1	0	0	1	0	1	1	2	3	0.066245	11.5	2.5	7.6667	23	5	11.5	2.5
	1	82282568	74118771	0	1		1	0	0	1	0	402	402.335	35.1	1	1	1	1	0	1	1	7	3	2.3333	0.57447	1	1	0	0	1	0	0	1	0	1	1	2	3	0.066245	11.5	2.5	7.6667	23	5	11.5	2.5
0	1	26724526	74118771	0	1	1	1	0	0	0	0	620	620.366	10.9	1	0	1	1	0	1	0	5	2	2.5	0.42	0	1	0	1	1	0	0	1	0	0	1	1	3	0.037443	13	4	4.3333	13	4	13	4
1	1	26724526	74118771	0	1	1	1	0	0	0	1	1130	1131.39	37.1	0	1	1	1	0	1	0	5	2	2.5	0.38298	1	1	0	0	1	0	0	1	0	0	1	2	3	0.046084	8	2.5	5.3333	16	5	8	2.5
	1	26724526	74118771	0	1	1	1	0	0	0	1	1474	1476.34	35.1	1	1	1	1	0	1	0	6	2	3	0.3617	1	1	0	0	1	0	0	1	0	1	1	2	3	0.066245	11.5	2.5	7.6667	23	5	11.5	2.5
0	1	26724526	74118771	0	1	1	1	0	0	0	1	620	620.37	10.9	1	0	1	1	0	1	0	5	2	2.5	0.42	0	1	0	1	1	0	0	1	0	0	1	1	3	0.037443	13	4	4.3333	13	4	13	4
1	1	26724526	74118771	0	1	1	1	0	0	0	1	1130	1131.39	37.1	0	1	1	1	0	1	0	5	2	2.5	0.38298	1	1	0	0	1	0	0	1	0	0	1	2	3	0.046084	8	2.5	5.3333	16	5	8	2.5
	1	26724526	74118771	0	1	1	1	0	0	0	1	1474	1476.34	35.1	1	1	1	1	0	1	0	6	2	3	0.3617	1	1	0	0	1	0	0	1	0	1	1	2	3	0.066245	11.5	2.5	7.6667	23	5	11.5	2.5
0	1	16143432	74118771	1	1	1	1	0	0	1	0	702	703.416	10.9	1	0	1	1	0	1	1	3	4	0.75	0.56	0	1	0	1	1	0	0	1	0	0	1	1	3	0.037443	13	4	4.3333	13	4	13	4
1	1	16143432	74118771	1		1	1					1367		194.3	0	1	1	1	0	1	1	3	4	0.75	0.56	1	1	0	0	1	0	0	1	0	0	1	2	3	0.046084	8	2.5	5.3333	16	5	8	2.5
	1	16143432	74118771	1	1	1	0	0	0	0	1	1557	1559.37	35.1	1	1	1	1	0	1	1	4	4	1	0.51064	1	1	0	0	1	0	0	1	0	1	1	2	3	0.066245	11.5	2.5	7.6667	23	5	11.5	2.5
0	1	77377213	63331484	0	1	1	1	0	0	1	0	419	419.5	64.3	1	0	0	1	0	1	1	6	6	1	0.43	0	1	0	0	0	0	0	0	0	0	1	1		0.069733	21	4		21	4	21	4
1	1	77377213	63331484	0	0	1	0	0	0	0	1	891	890.404	11.2	0	1	1	1	0	1	1	9	5	1.8	0.39362	1	1	0	0	1	0	1	1	0	1	1	2	3	0.083015	12.5	2	8.3333	25	4	12.5	2
	1	77377213	63331484	0	1		1	1	0	1	0	439	451.308	21.9	1	1	1	1	0	1	1	6	3	2	0.46809	1	1	0	0	1	0	0	1	0	1	1	2	1	0.063092	9.5	2	19	19	4	9.5	2
0	1	18811558	53786255	0	1	1	1	0	0	1	0		400.615		1	0	1	1	0	1	1	4	4	1	0.58	0	1	0	1	1	0	0	1	0	0	1	1	2	0.037266	29	7	14.5	29	7	29	7
1	1	18811558	53786255	0	1	1	1	0	0	0	1	870	870.414	11.2	1	1	1	1	0	1	0	7	4	1.75	0.34043	1	1	1	0	1	0	0	1	0	1	1	2	5	0.051401	20	3.5	8	40	7	20	3.5
	1	18811558	53786255	0	0	1	0	0	0	0	1	1248	1568.41	0	0	1	1	1	0	1	1	7	4	1.75	0.38298	1	1	0	0	1	0	0	1	0	0	1	2	3	0.046261	18	3.5	12	36	7	18	3.5
0	1	18811558	53786255	0	1	1	1	0	0	0	1	1032	1032.62	64.3	1	0	1	1	0	1	1	4	4	1	0.58	0	1	0	1	1	0	0	1	0	0	1	1	2	0.037266	29	7	14.5	29	7	29	7
1	1	18811558	53786255	0	1	1	1	0	0	0	1	1502	1502.42	11.2	1	1	1	1	0	1	0	7	4	1.75	0.34043	1	1	1	0	1	0	0	1	0	1	1	2	5	0.051401	20	3.5	8	40	7	20	3.5
	1	18811558	53786255	0	1	1	1	0	0	0	1	1874	1877.46	0	0	1	1	1	0	1	1	7	4	1.75	0.38298	1	1	0	0	1	0	0	1	0	0	1	2	3	0.046261	18	3.5	12	36	7	18	3.5
0	1	18811558	53786255	0	1	1	1	0	0	0	1	1441	1441.64	64.3	1	0	1	1	0	1	1	4	4	1	0.58	0	1	0	1	1	0	0	1	0	0	1	1	2	0.037266	29	7	14.5	29	7	29	7
1	1	18811558	53786255	0	1	1	1	0	0	0	1	1912	1911.43	11.2	1	1	1	1	0	1	0	7	4	1.75	0.34043	1	1	1	0	1	0	0	1	0	1	1	2	5	0.051401	20	3.5	8	40	7	20	3.5
	1	14831826	53786255	1	1		1	0	0	0	1	383	710.434	0	0	1	1	1	0	1	1	5	3	1.6667	0.45745	1	1	0	0	1	0	0	1	0	0	1	2	3	0.046261	18	3.5	12	36	7	18	3.5
	1	75333281	53786255	0	0		0	0	0	1	0	713	717.475	0	0	1	1	1	1	1	1	7	2	3.5	0.38298	1	1	0	0	1	0	0	1	0	0	1	2	3	0.046261	18	3.5	12	36	7	18	3.5
0	1	22162845	53786255	0	1	1	1	1	0	1	0	270	270.641	64.3	1	0	1	1	0	1	1	5	4	1.25	0.52	0	1	0	1	1	0	0	1	0	0	1	1	2	0.037266	29	7	14.5	29	7	29	7
1	1	22162845	53786255	0	0	1	1	0	0	0	1	740	1033.75	11.2	1	1	1	1	0	1	1	6	3	2	0.46809	1	1	1	0	1	0	0	1	0	1	1	2	5	0.051401	20	3.5	8	40	7	20	3.5
	1	22162845	53786255	0	0	1	0	0	0	0	1	1112	1115.49	0	0	1	1	1	0	1	0	3	2	1.5	0.5	1	1	0	0	1	0	0	1	0	0	1	2	3	0.046261	18	3.5	12	36	7	18	3.5
0	1	71234462	53786255	0	1	1	1	1	0	1	0	191	191.645	64.3	1	0	1	1	0	1	1	4	2	2	0.55	0	1	0	1	1	0	0	1	0	0	1	1	2	0.037266	29	7	14.5	29	7	29	7
1	1	71234462	53786255	0	1	1	1	0	0	0	1	661	681.375	11.2	1	1	1	1	0	1	1	4	3	1.3333	0.55319	1	1	1	0	1	0	0	1	0	1	1	2	5	0.051401	20	3.5	8	40	7	20	3.5
	1	71234462	53786255	0		1	1					1040		0	0	1	1	1	0	1	1	4	2	2	0.52128	1	1	0	0	1	0	0	1	0	0	1	2	3	0.046261	18	3.5	12	36	7	18	3.5
1	1	44536671	13847282	1	1		1	1	1	1	0	211	212.404	2	0	1	1	1	0	1	0	3	2	1.5	0.5	1	1	1	0	1	0	0	1	0	0	0	2	1	0.11859	17	5	34	34	10	17	5
	1	44536671	13847282	1	1		1	0	0	1	0	569	569.509	0	1	1	1	1	0	1	0	3	2	1.5	0.53191	1	1	1	0	1	1	0	1	0	0	1	2	1	0.073246	10.5	4.5	21	21	9	10.5	4.5
1	1	31683413	13847282	0	1		1	1	0	1	0	252	253.42	11.2	0	1	1	1	0	1	0	3	2	1.5	0.51064	1	1	1	0	1	0	0	1	0	0	0	2	1	0.11859	17	5	34	34	10	17	5
	1	31683413	13847282	0	1		1	0	0	0	1	623	623.381	0	1	1	1	1	0	1	0	3	2	1.5	0.53191	1	1	1	0	1	1	0	1	0	0	1	2	1	0.073246	10.5	4.5	21	21	9	10.5	4.5
0	1	61213488	13847282	0	1	1	1	1	0	1	0	112	105.368	33	1	0	1	1	0	1	0	5	3	1.6667	0.45	0	1	0	0	1	0	0	1	0	0	1	1	2	0.076734	22	5	11	22	5	22	5
1	1	61213488	13847282	0	1	1	1	1	0	1	0	576	575.46	11.2	0	1	1	1	0	1	0	6	2	3	0.34043	1	1	1	0	1	0	0	1	0	0	0	2	1	0.11859	17	5	34	34	10	17	5
	1	61213488	13847282	0	1	1	1	0	0	0	1	947	945.423	0	1	1	1	1	0	1	0	6	2	3	0.3617	1	1	1	0	1	1	0	1	0	0	1	2	1	0.073246	10.5	4.5	21	21	9	10.5	4.5
1	1	12133736	13847282	0	1		1	1	1	1	0	507	800.572	11.2	0	1	1	1	0	1	0	2	1	2	0.53191	1	1	1	0	1	0	0	1	0	0	0	2	1	0.11859	17	5	34	34	10	17	5
	1	12133736	13847282	0	1		1	0	0	0	1	884	883.374	0	1	1	1	1	0	1	0	2	2	1	0.60638	1	1	1	0	1	1	0	1	0	0	1	2	1	0.073246	10.5	4.5	21	21	9	10.5	4.5
0	1	28152278	71651563	0	0	1	0	0	0	0	1	1184	1184.4	12.9	1	0	1	0	0	1	1	4	2	2	0.41	0	1	0	0	1	0	0	1	0	0	0	1	1	0.066767	16	5	16	16	5	16	5
1	1	28152278	71651563	0	1	1	0	0	0	0	1	1547	1548.33	32	0	1	1	0	1	1	1	4	1	4	0.37234	1	1	0	0	1	0	0	1	0	0	0	2	0	0.091804	11	2.5		22	5	11	2.5
0	1	42211428	12531261	1	1	1	1	1	1	1	0	120	120	64.3	1	0	0	1	0	0	0	9	3	3	0.2	0	1	0	1	1	0	0	1	0	1	1	1	1	0.083433	38	7	38	38	7	38	7
0	1	42211428	12531261	0	1	1	1	1	0	1	0	155	155	64.3	1	0	0	1	0	0	0	9	3	3	0.2	0	1	0	1	1	0	0	1	0	1	1	1	1	0.083433	38	7	38	38	7	38	7
1	1	42211428	12531261	0	1	1	1	0	0	1	0	625	626.45	11.2	0	1	1	1	0	1	0	5	2	2.5	0.2766	1	1	0	0	1	0	0	1	0	0	1	2	2	0.043912	10	3	10	20	6	10	3
	1	42211428	12531261	0	0	1	1	0	0	0	1	994	991.496	0	0	1	1	1	1	1	0	7	2	3.5	0.31915	1	1	0	0	1	0	0	1	0	0	1	2	2	0.041716	9.5	3	9.5	19	6	9.5	3
0	1	42211428	12531261	0	1	1	1	0	0		1	974	974	64.3	1	0	0	1	0	0	0	9	3	3	0.2	0	1	0	1	1	0	0	1	0	1	1	1	1	0.083433	38	7	38	38	7	38	7
	1	16277865	15386218	1	0		1	0	0	0	1		1863.41		0	1	1	0				4	1			1	1	0	0	1	0	0	1	0	0	0	2	4	0.074172	14	3	7	28	6	14	3
0	1	15344166	15386218	1	1	1	1	1	0	0	1		453.455		1	0	0	1	0	1	1	3	3	1	0.63	0	1	0	0	1	1	1	0	0	0	1	1	4	0.084768	32	5	8	32	5	32	5
1	1	15344166	15386218	1	1	1	1	0	0	0	1	911	915.381	11.2	1	1	1	1	0	1	1	3	3	1	0.60638	1	1	0	0	1	0	0	1	0	1	1	2	4	0.092715	17.5	3	8.75	35	6	17.5	3
	1	15344166	15386218	1	0	1	1	0	0	0	1		1598.42		0	1	1	1	0	1	1	3	3	1	0.60638	1	1	0	0	1	0	0	1	0	0	0	2	4	0.074172	14	3	7	28	6	14	3
0	1	18534232	15386218	0	1	1	0	0	0	1	1	609	609.429	1	1	0	0	1	0	1	0	3	2	1.5	0.53	0	1	0	0	1	1	1	0	0	0	1	1	4	0.084768	32	5	8	32	5	32	5
1	1	18534232	15386218	0	1	1	0	0	0	0	1	1064	1067.38	11.2	1	1	1	1	1	1	1	8	2	4	0.3617	1	1	0	0	1	0	0	1	0	1	1	2	4	0.092715	17.5	3	8.75	35	6	17.5	3
	1	18534232	15386218	0	0	1	1	0	0	0	1	1433	1434.37	0	0	1	1	1	0	1	0	5	3	1.6667	0.30851	1	1	0	0	1	0	0	1	0	0	0	2	4	0.074172	14	3	7	28	6	14	3
	1	18534232	15386218	0	1		1	1	0	1	0	298	299.37	0	0	1	1	1	0	1	0	5	3	1.6667	0.30851	1	1	0	0	1	0	0	1	0	0	0	2	4	0.074172	14	3	7	28	6	14	3
1	1	17641566	15386218	0	0	1	0	0	0	0	1	493	492.469	11.2	1	1	1	1	1	1	1	13	4	3.25	0.39362	1	1	0	0	1	0	0	1	0	1	1	2	4	0.092715	17.5	3	8.75	35	6	17.5	3
	1	17641566	15386218	0	0	1	1	0	0	0	1	861	862.356	0	0	1	1	1	0	1	1	12	4	3	0.39362	1	1	0	0	1	0	0	1	0	0	0	2	4	0.074172	14	3	7	28	6	14	3
0	1	17641566	15386218	1	1	1	1	0	0	0	1	572	559.323	33	1	0	1	1	0	1	1	12	4	3	0.43	0	1	0	0	1	1	1	0	0	0	1	1	4	0.084768	32	5	8	32	5	32	5
1	1	17641566	15386218	1	1	1	0	0	0	0	1	1031	1031.78	11.2	1	1	1	1	1	1	1	13	4	3.25	0.39362	1	1	0	0	1	0	0	1	0	1	1	2	4	0.092715	17.5	3	8.75	35	6	17.5	3
	1	17641566	15386218	1	0	1	1	0	0	0	1	1400	1400.36	0	0	1	1	1	0	1	1	12	4	3	0.39362	1	1	0	0	1	0	0	1	0	0	0	2	4	0.074172	14	3	7	28	6	14	3
	1	17641566	15386218	0	1		1	0	0	1	0	351	352.366	0	0	1	1	1	0	1	1	12	4	3	0.39362	1	1	0	0	1	0	0	1	0	0	0	2	4	0.074172	14	3	7	28	6	14	3
1	1	68327561	15386218	1	1		0	1	0	1	0	112	113.358	11.2	1	1	1	0	0	1	1	4	3	1.3333	0.48936	1	1	0	0	1	0	0	1	0	1	1	2	4	0.092715	17.5	3	8.75	35	6	17.5	3
	1	68327561	15386218	1	1		0	0	0	0	1	481	481.545	0	0	1	1	1	0	1	1	4	2	2	0.48936	1	1	0	0	1	0	0	1	0	0	0	2	4	0.074172	14	3	7	28	6	14	3
0	1	71618677	24514477	0	0	1	0	1	0	1	0	391	391.495	33	0	0	0	1	1	0	0	9	2	4.5	0.2	0	1	0	1	1	0	0	1	0	0	0	1	3	0.15695	36	5	12	36	5	36	5
	1	71618677	24514477	0	0	1	1	0	0	0	1	1331	1334.33	31.3	0	1	1	1	0	1	1	7	3	2.3333	0.38298	1	1	0	0	1	0	1	1	0	0	0	2	4	0.087197	10	3	5	20	6	10	3
0	1	71618677	24514477	0	0	1	0	0	0	0	1	1275	1275.5	33	0	0	0	1	1	0	0	9	2	4.5	0.2	0	1	0	1	1	0	0	1	0	0	0	1	3	0.15695	36	5	12	36	5	36	5
	1	71618677	24514477	0		1	0					2370		218.2	0	1	1	1	0	1	1	7	3	2.3333	0.38298	1	1	0	0	1	0	1	1	0	0	0	2	4	0.087197	10	3	5	20	6	10	3
	1	71618677	24514477											31.3	0	1	1	1	0	1	1	7	3	2.3333	0.38298	1	1	0	0	1	0	1	1	0	0	0	2	4	0.087197	10	3	5	20	6	10	3
0	1	64862547	24514477	1	1	1	0	0	0	0	1	1394	1394.5	33	1	0	0	1	0	1	0	7	3	2.3333	0.38	0	1	0	1	1	0	0	1	0	0	0	1	3	0.15695	36	5	12	36	5	36	5
0	1	58842888	24514477	1	1	1	1	1	0	1	0	644	643.517	33	1	0	0	1	0	1	0	2	2	1	0.53	0	1	0	1	1	0	0	1	0	0	0	1	3	0.15695	36	5	12	36	5	36	5
1	1	58842888	24514477	1		1	1					1372		194.3	0	1	1	1	0	1	1	3	3	1	0.60638	1	1	0	0	1	0	1	1	0	0	0	2	3	0.078477	9	2.5	6	18	5	9	2.5
	1	58842888	24514477	1	0	1	1	0	0	0	1	1738	1586.33	218.2	0	1	1	1	0	1	1	3	3	1	0.60638	1	1	0	0	1	0	1	1	0	0	0	2	4	0.087197	10	3	5	20	6	10	3
	1	35633775	24514477	0	0		0	0	0	0	1		759.355		0	1	1	1	0	1	1	3	2	1.5	0.41489	1	1	0	0	1	0	1	1	0	0	0	2	4	0.087197	10	3	5	20	6	10	3
1	1	74534446	15512716	1	1		1	1	0	1	0	465	465.385	35	1	1	1	1	0	1	1	8	3	2.6667	0.2766	1	1	1	0	1	1	1	0	0	0	1	2	1	0.091823	8.5	2.5	17	17	5	8.5	2.5
	1	74534446	15512716	1	1		1	0	0	0	1	835	836.36	37.1	0	1	1	1	0	1	1	8	3	2.6667	0.39362	1	1	0	0	1	0	0	1	0	0	1	2	1	0.0054013	0.5	3.5	1	1	7	0.5	3.5
1	1	74534446	15512716	1	1		1	0	0	0	1	1082	1081.38	35	1	1	1	1	0	1	1	8	3	2.6667	0.2766	1	1	1	0	1	1	1	0	0	0	1	2	1	0.091823	8.5	2.5	17	17	5	8.5	2.5
1	1	87452774	15512716	1	1		0	0	0	1	0	560	560.307	37.1	1	1	1	1	0	1	1	3	2	1.5	0.40426	1	1	1	0	1	1	1	0	0	0	1	2	1	0.091823	8.5	2.5	17	17	5	8.5	2.5
	1	62323884	15512716	1	0		1	0	0	0	1	884	885.39	37.1	0	1	1	1	0	1	1	4	2	2	0.45745	1	1	0	0	1	0	0	1	0	0	1	2	1	0.0054013	0.5	3.5	1	1	7	0.5	3.5
0	1	52738714	47712286	1	1	1	0	0	0	1	0	464	464.449	33	1	0	1	1	1	1	0	11	3	3.6667	0.33	0	1	0	1	1	0	0	1	1	1	1	4	1	0.13556	4.25	1.75	17	17	7	4.25	1.75
1	1	52738714	47712286	1	1	1	0	0	0	0	1	974	983.596	35	0	1	1	1	0	1	0	5	2	2.5	0.38298	1	1	0	0	1	0	0	1	0	0	0	2	1	0.12759	8	3	16	16	6	8	3
1	1	52738714	47712286	1	0		0	0	0	0	1	922	923.603	35	0	1	1	1	0	1	0	5	2	2.5	0.38298	1	1	0	0	1	0	0	1	0	0	0	2	1	0.12759	8	3	16	16	6	8	3
	1	52738714	47712286	1	0		0	0	0	0	1	1267	1268.58	0	0	1	1	1	0	1	0	5	2	2.5	0.41489	1	1	0	0	1	0	0	1	0	0	0	2	1	0.11961	7.5	3	15	15	6	7.5	3
0	1	85573171	43211746	0	1	1	0	1	0	1	0	374	376.457	33	1	0	1	1	0	1	1	5	4	1.25	0.49	0	1	0	0	1	0	1	1	0	0	1	1	1	0.1039	26	6	26	26	6	26	6
1	1	85573171	43211746	0	1	1	0	0	0	0	1	914	922.564	0	0	1	1	1	0	1	1	5	2	2.5	0.46809	1	1	0	0	1	0	1	1	0	0	0	2	1	0.1039	13	2.5	26	26	5	13	2.5
	1	85573171	43211746	0	0	1	0	0	0	0	1	1285	1285.42	35.1	1	0	1	1	0	1	1	5	2	2.5	0.48936	1	1	0	0	1	0	1	1	0	0	0	2	2	0.1039	13	3	13	26	6	13	3
0	1	33724825	43211746	0	0	1	0	0	0	1	0	790	792.474	33	1	0	1	1	0	1	1	5	2	2.5	0.54	0	1	0	0	1	0	1	1	0	0	1	1	1	0.1039	26	6	26	26	6	26	6
1	1	33724825	43211746	0	1	1	0	0	0	0	1	1330	1338.57	0	0	1	1	1	1	1	1	5	1	5	0.45745	1	1	0	0	1	0	1	1	0	0	0	2	1	0.1039	13	2.5	26	26	5	13	2.5
	1	33724825	43211746	0	0	1	0	0	0	0	1	1701	1701.44	35.1	1	0	1	1	1	1	1	5	1	5	0.45745	1	1	0	0	1	0	1	1	0	0	0	2	2	0.1039	13	3	13	26	6	13	3
1	1	81764876	75623441	0	1		0	0	0	0	1	517	722.435	0	0	1	1	1	0	1	1	5	2	2.5	0.45745	1	1	0	0	1	0	0	1	0	0	0	2	1	0.062244	10.5	3.5	21	21	7	10.5	3.5
	1	81764876	75623441	0			0					898		31.3	1	1	1	1	0	1	1	4	2	2	0.52128	1	1	0	0	1	0	0	1	0	0	0	2	1	0.080028	13.5	3.5	27	27	7	13.5	3.5
0	1	14134461	75623441	0	1	1	1	0	0	1	0	655	656.537	33	1	0	0	1	0	1	1	5	2	2.5	0.42	0	0	0	1	1	0	0	1	0	0	1	1	1	0.068172	23	7	23	23	7	23	7
	1	14134461	75623441	0	0	1	0	0	0	0	1	1595	1595.41	31.3	1	1	1		0	1	1	5	2	2.5	0.42	1	1	0	0	1	0	0	1	0	0	0	2	1	0.080028	13.5	3.5	27	27	7	13.5	3.5
	1	85364256	75623441	0	0		0	1	0	1	0		449.422		1	1	1	1	0	1	1	4	2	2	0.52128	1	1	0	0	1	0	0	1	0	0	0	2	1	0.080028	13.5	3.5	27	27	7	13.5	3.5
0	1	67743623	18772488	0	1	1	0	1	0	1	0	43	43.3788	1	1	0	1	1	1	1	1	14	3	4.6667	0.38	0	1	0	0	1	1	0	1	0	0	1	1	1	0.12166	39	4	39	39	4	39	4
1	1	67743623	18772488	0	0	1	1	1	0	1	0	560	559.337	35	1	1	1	1	1	1	1	14	4	3.5	0.39362	1	1	0	0	1	0	0	1	0	0	1	2	3	0.090466	14.5	2	9.6667	29	4	14.5	2
	1	67743623	18772488	0	1	1	0	0	0	0	0	1042	1039.41	68.1	0	1	1	1	0	1	1	9	3	3	0.39362	1	1	0	0	1	0	0	1	0	0	1	2	2	0.074868	12	3	12	24	6	12	3
0	1	67743623	18772488	0	0	1	1	0	0	0	1	1232	1225.39	2.3	1	0	1	1	1	1	1	14	3	4.6667	0.38	0	1	0	0	1	1	0	1	0	0	1	1	1	0.12166	39	4	39	39	4	39	4
1	1	67743623	18772488	0	1	1	1	0	0	0	1	1757	1741.33	0	1	1	1	1	1	1	1	14	4	3.5	0.39362	1	1	0	0	1	0	0	1	0	0	1	2	3	0.090466	14.5	2	9.6667	29	4	14.5	2
	1	67743623	18772488	0	1	1	0	0	0	0	1	2302	2221.41	238	0	1	1	1	0	1	1	9	3	3	0.39362	1	1	0	0	1	0	0	1	0	0	1	2	2	0.074868	12	3	12	24	6	12	3
0	1	21764316	18772488	1	0	1	1	1	1	1	0		42.4226		1	0	1	1	1	1	1	12	3	4	0.38	0	1	0	0	1	1	0	1	0	0	1	1	1	0.12166	39	4	39	39	4	39	4
0	1	21764316	18772488	0	1	1	0	0	0	0	1	895	890.427	2.3	1	0	1	1	1	1	1	12	3	4	0.38	0	1	0	0	1	1	0	1	0	0	1	1	1	0.12166	39	4	39	39	4	39	4
1	1	21764316	18772488	0	0	1	1	0	0	0	1		1406.35		1	1	1	1	1	1	1	9	2	4.5	0.39362	1	1	0	0	1	0	0	1	0	0	1	2	3	0.090466	14.5	2	9.6667	29	4	14.5	2
	1	37874888	18772488											35.1	0	1	1	1	1	1	1	4	1	4	0.48936	1	1	0	0	1	0	0	1	0	0	1	2	2	0.074868	12	3	12	24	6	12	3
0	1	62834274	72721818	1	1	1	0	0	0	1	0	808	804.455	2.3	0	0	0	1	0	1	0	8	4	2	0.29	0	1	0	1	1	0	1	1	0	0	1	1	2	0.088673	37	5	18.5	37	5	37	5
1	1	62834274	72721818	1	0	1	1	0	0	0	1	1348	1349.51	0	0	1	1	1	0	1	0	8	3	2.6667	0.28723	1	1	0	0	0	0	0	0	0	0	1	2	2	0.064707	13.5	2.5	13.5	27	5	13.5	2.5
	1	62834274	72721818	1	0	1	0	0	0	0	1	1896	1946.41	198.2	0	1	1	1	0	1	0	8	3	2.6667	0.28723	1	1	0	0	1	0	1	1	0	0	0	2	2	0.062311	13	2.5	13	26	5	13	2.5
0	1	13452436	47846853	1	1	1	1	1	1	1	0	244	240.46	2.3	1	0	0	1	0	0	0	9	4	2.25	0.28	0	1	0	0	1	0	0	1	0	0	0	0	2	0.0508			9.5	19	4
1	1	13452436	47846853	1	1	1	0	0	0	0	1	846	759.421	94.5	0	1	1	1	1	1	1	8	2	4	0.39362	1	1	0	0	1	1	0	0	0	0	0	2	2	0.066843	12.5	2.5	12.5	25	5	12.5	2.5
	1	13452436	47846853	1		1	0					1312		363.2	0	0	0	1	1	1	1	8	2	4	0.39362	1	1	0	0	1	0	0	1	0	0	0	2	3	0.061495	11.5	2.5	7.6667	23	5	11.5	2.5
0	1	23852585	47846853	0	1	1	1	0	0	1	0	732	732.455	1	1	0	0	1	1	1	0	8	2	4	0.29	0	1	0	0	1	0	0	1	0	0	0	0	2	0.0508			9.5	19	4
1	1	23852585	47846853	0	1	1	0	0	0	0	1	1339	1251.53	103.9	0	1	1	1	0	1	1	7	3	2.3333	0.41489	1	1	0	0	1	1	0	0	0	0	0	2	2	0.066843	12.5	2.5	12.5	25	5	12.5	2.5
	1	23852585	47846853	0	1	1	0	0	0	0	1	1645	1638.52	35.1	0	0	0	1	0	1	1	7	3	2.3333	0.39362	1	1	0	0	1	0	0	1	0	0	0	2	3	0.061495	11.5	2.5	7.6667	23	5	11.5	2.5
	1	76841478	47846853												0	0	0	0				7	1			1	1	0	0	1	0	0	1	0	0	0	2	3	0.061495	11.5	2.5	7.6667	23	5	11.5	2.5
0	1	55445614	68662463	1	0	1	0	0	0	1	0		324.584		1	0	0	1	0	1	1	5	2	2.5	0.67	1	1	0	1	0	0	0	0	0	1	1	1	1	0.087552	11	4	11	11	4	11	4
	1	55445614	68662463	1	0	1	1	0	0	0	1	1062	1063.38	2	1	1	1	1	0	1	1	4	3	1.3333	0.71277	1	1	0	0	1	0	0	1	0	0	0	1	1	0.079593	10	3	10	10	3	10	3
1	1	76627554	27231813	0	1		1	1	0	1	0	331	330.538	29.3	1	1	1	0	0	1	1	4	2	2	0.52128	1	1	0	0	1	0	0	1	0	0	0	1	0	0.084411	11	3		11	3	11	3
	1	76627554	27231813	0	0		1	0	0	1	0	721	721.937	25.1	1	1	1	0	0	1	1	4	2	2	0.52128	1	1	0	0	1	0	0	1	0	0	1	1	0	0.069064	9	3		9	3	9	3
	1	51174756	27231813	1	0		0	0	0	0	1	834	834.954	25.1	1	1	1	0	0	1	1	4	2	2	0.52128	1	1	0	0	1	0	0	1	0	0	1	1	0	0.069064	9	3		9	3	9	3
	1	23634657	83124482											25.1	0	1	1	0	0	1	0	4	3	1.3333	0.44681	1	1	0	0	0	0	0	0	0	0	0	1	1	0.1064	14	4	14	14	4	14	4
0	1	56566213	83124482	1	0	1	1	0	0	0	1		1281.37		1	1	1	1	0	1	1	5	2	2.5	0.35	1	1	0	0	1	0	0	1	0	0	0	1	1	0.098796	13	5	13	13	5	13	5
	1	56566213	83124482	1		1	1					2172		35.1	0	1	1	1	0	1	0	4	2	2	0.39362	1	1	0	0	0	0	0	0	0	0	0	1	1	0.1064	14	4	14	14	4	14	4
0	1	73638342	88717618	1	1	1	0	0	0	1	0	950	951.499	2.3	1	1	1	1	0	1	1	6	2	3	0.47	1	1	0	0	1	0	0	1	0	0	0	1	3	0.070571	15	3	5	15	3	15	3
0	1	55888241	18553385	0	1	1	1	0	0	0	1	787	788.528	2.3	1	1	1	1	0	1	1	3	2	1.5	0.6		1			0	0	0	0	0		0		1	0.072396			10	10	3
	1	81337451	18553385											25.1	0	1	1						1			1	1	0	0	1	0	1	1	0	0	0	1	1	0.072396	10	2	10	10	2	10	2
	1	22254842	21121417	0	1		1	1	1	1	0	123	124.014	25.1	1	1	1	0	0	1	1	4	3	1.3333	0.55319	1	1	0	0	1	0	0	1	0	0	0	1	0	0.076731	9	3		9	3	9	3
0	1	41188258	21121417	1	1	1	1	1	1	1	0		373.407		1	1	1	0	1	1	1	5	1	5	0.39	1	1	0	0	1	0	1	0	0	0	0	1	0	0.093782	11	3		11	3	11	3
1	1	41188258	21121417	1	1	1	0	0	0	0	1	748	748.35	29.3	1	1	1	0	0	1	0	4	2	2	0.39362	1	1	0	0	0	0	0	0	0	0	0	1	0	0.051154	6	3		6	3	6	3
	1	41188258	21121417	1		1	0					1136		26.1	1	1	1	0	0	0	0	3	2	1.5	0.3617	1	1	0	0	1	0	0	1	0	0	0	1	0	0.076731	9	3		9	3	9	3
0	1	86343436	74265484	1	0	1	0	0	0	1	0		1386.5		1	1	0	1	0	1	0	6	3	2	0.3	0	1	0	1	0	0	0	0	0	0	0	1	2	0.071228	14	3	7	14	3	14	3
1	1	86343436	74265484	1	0	1	0	0	0	0	1	1847	1847.39	2	0	1	1	1	1	0	0	7	2	3.5	0.21277	1	1	0	0	1	0	0	1	0	0	1	2	2	0.076315	7.5	1.5	7.5	15	3	7.5	1.5
1	1	86343436	74265484	0	1		1	1	0	1	0	391	369.376	0	0	1	1	1	1	0	0	7	2	3.5	0.21277	1	1	0	0	1	0	0	1	0	0	1	2	2	0.076315	7.5	1.5	7.5	15	3	7.5	1.5
	1	86343436	74265484	0	1		1	0	0	0	1	735	735.369	0	1	1	1	1	0	0	0	5	2	2.5	0.12766	1	1	0	0	1	0	0	1	0	0	0	2	1	0.076315	7.5	1.5	15	15	3	7.5	1.5
0	1	78853463	78252386	1	1	1	1	0	0	0	1	1401	1401.55	2.3	1	1	1	1	0	1	1	8	3	2.6667	0.43	1	1	0	0	0	0	0	0	0	0	1	1	2	0.031127	11	2	5.5	11	2	11	2
0	1	21874348	78252386	0	1	1	1	0	0	1	0	477	477.569	2.3	1	1	1	1	0	1	1	7	3	2.3333	0.37	1	1	0	0	0	0	0	0	0	0	1	1	2	0.031127	11	2	5.5	11	2	11	2
1	1	21874348	78252386	0	1	1	0	0	0	0	1	852	847.354	29.3	0	1	1	1	1	1	1	8	2	4	0.30851	1	1	0	0	0	0	0	0	0	0	0	1	2	0.042446	15	3	7.5	15	3	15	3
0	1	21874348	78252386	1	1	1	1	0	0	0	1		1158.57		1	1	1	1	0	1	1	7	3	2.3333	0.37	1	1	0	0	0	0	0	0	0	0	1	1	2	0.031127	11	2	5.5	11	2	11	2
1	1	21874348	78252386	1	1	1	0	0	0	0	1	1578	1528.36	51.3	0	1	1	1	1	1	1	8	2	4	0.30851	1	1	0	0	0	0	0	0	0	0	0	1	2	0.042446	15	3	7.5	15	3	15	3
1	1	21874348	78252386	1	1		0	1	0	1	0	264	263.365	29.3	0	1	1	1	1	1	1	8	2	4	0.30851	1	1	0	0	0	0	0	0	0	0	0	1	2	0.042446	15	3	7.5	15	3	15	3
0	1	11142712	32258733				0	0	0	1	0	724	724.496	2.3	1	1	0	1	0	0	0	3	2	1.5	0.47	0	1	0	0	1	0	0	1	0	0	0	1	1	0.092306	16	3	16	16	3	16	3
	1	11142712	32258733	0	1		0	0	0	0	1	1628	1489.36	35.1	0	1	1	1	1	1	0	4	1	4	0.41489	1	1	0	0	1	0	0	1	0	0	0	1	1	0.046153	8	2	8	8	2	8	2
0	1	73882355	32258733	1	1	1	1	0	0	1	0	327	327.483	2.3	1	0	0	1	1	1	0	10	3	3.3333	0.31	0	1	0	0	1	0	0	1	0	0	0	1	1	0.092306	16	3	16	16	3	16	3
1	1	73882355	32258733	1	1	1	1	0	0	0	1	706	704.433	29.3	1	1	1	1	0	1	0	8	3	2.6667	0.31915	1	1	0	0	1	0	0	1	0	0	0	1	1	0.086537	15	3	15	15	3	15	3
	1	73882355	32258733	1	0	1	0	0	0	0	1	1091	1091.36	26.1	0	1	1	1	0	1	0	4	3	1.3333	0.44681	1	1	0	0	1	0	0	1	0	0	0	1	1	0.046153	8	2	8	8	2	8	2
0	1	73882355	32258733	0	1	1	1	0	0	1	0	865	865.476	2.3	1	0	0	1	1	1	0	10	3	3.3333	0.31	0	1	0	0	1	0	0	1	0	0	0	1	1	0.092306	16	3	16	16	3	16	3
1	1	73882355	32258733	0	1	1	0	0	0	0	1	1242	1243.39	29.3	1	1	1	1	0	1	0	8	3	2.6667	0.31915	1	1	0	0	1	0	0	1	0	0	0	1	1	0.086537	15	3	15	15	3	15	3
	1	73882355	32258733	0	0	1	0	0	0	0	1	1628	1629.34	26.1	0	1	1	1	0	1	0	4	3	1.3333	0.44681	1	1	0	0	1	0	0	1	0	0	0	1	1	0.046153	8	2	8	8	2	8	2
0	1	26415878	32258733	0	1	1	1	0	0	0	1		1417.5		1	0	0	1	0	1	0	3	2	1.5	0.56	0	1	0	0	1	0	0	1	0	0	0	1	1	0.092306	16	3	16	16	3	16	3
	1	14224528	38627676	1	1		1	1	0	1	0	270	271.347	0	1	1	1	1	0	1	1	8	3	2.6667	0.39362	1	1	0	0	1	0	0	1	0	0	0	1	1	0.092772	10	3	10	10	3	10	3
0	1	41475588	38627676	0	1	1	1	1	1	1	0	84	60.5229	7.9	1	0	0	1	0	1	0	4	2	2	0.45	0	1	0	0	1	0	0	1	0	0	1	1	1	0.10205	11	3	11	11	3	11	3
1	1	41475588	38627676	0		1	1					458		11.2	0	1	1	1	0	1	0	4	2	2	0.41489	1	1	0	0	1	0	0	1	0	0	0	1	1	0.11133	12	3	12	12	3	12	3
0	0	13646817	56752556	1	1	1	1	1	0	1	0	130	130	10.9	1	0	0	1	0	1	1	6	4	1.5	0.43	0	1	0	1	1	0	0	1	0	0	1	1	1		18	3	18	18	3	18	3
0	0	15546575	56752556	0	0	1	1	0	0	1	0	647	647	10.9	1	0	0	1	0	1	1	7	3	2.3333	0.45	0	1	0	1	1	0	0	1	0	0	1	1	1		18	3	18	18	3	18	3
0	0	15546575	56752556	0	1	1	1	0	0	1	0		747		1	0	0	1	0	1	1	7	3	2.3333	0.45	0	1	0	1	1	0	0	1	0	0	1	1	1		18	3	18	18	3	18	3
0	0	86744832	56752556	0	1	1	1	0	0	0	1	693	692	10.9	1	0	0	1	0	1	1	4	2	2	0.51	0	1	0	1	1	0	0	1	0	0	1	1	1		18	3	18	18	3	18	3
0	1	13235163	45541538	1	0	1	1	1	0	1	0	402	402	10.9	1	1	0	1	0	1	0	12	4	3	0.33	1	1	0	0	0	0	0	0	0	0	0	1	2	0.027196	11	2	5.5	11	2	11	2
1	1	13235163	45541538	1	0	1	0	0	0	0	1	808	808.422	2	1	1	1	1	0	1	0	7	4	1.75	0.34043	1	1	0	0	0	0	0	0	0	0	0	1	1	0.024724	10	2	10	10	2	10	2
	1	13235163	45541538	1	1	1	1	0	0	0	1	1280	1169.66	31.3	0	1	1	1	0	1	0	7	4	1.75	0.34043	1	1	0	0	0	0	0	0	0	0	0	1	1	0.024724	10	2	10	10	2	10	2
0	1	13235163	45541538	0	0	1	1	1	0	1	0	463	463	10.9	1	1	0	1	0	1	0	12	4	3	0.33	1	1	0	0	0	0	0	0	0	0	0	1	2	0.027196	11	2	5.5	11	2	11	2
0	1	56578418	64632741	1	1	1	1	1	1	1	0	84	85.3587	10.9	1	0	0	1	1	1	1	21	5	4.2	0.43	1	1	0	0	0	0	0	0	0	0	0	1	1	0.097262	27	2	27	27	2	27	2
1	1	56578418	64632741	1	0	1	0	0	0	0	1	484	781.912	11.2	1	1	1	1	1	1	1	22	5	4.4	0.37234	1	1	0	0	1	0	0	1	0	0	0	1	1	0.090057	25	2	25	25	2	25	2
	1	56578418	64632741	1	0	1	1	0	0	0	1	848	859.491	8.9	0	1	1	1	1	1	1	19	5	3.8	0.39362	1	1	0	0	1	0	0	1	0	0	0	1	1	0.10447	29	2	29	29	2	29	2
0	1	56578418	64632741	1	1	1	1	0	0	1	0	238	239.361	10.9	1	0	0	1	1	1	1	21	5	4.2	0.43	1	1	0	0	0	0	0	0	0	0	0	1	1	0.097262	27	2	27	27	2	27	2
1	1	56578418	64632741	1	1	1	1	0	0	0	1	638	639.389	11.2	1	1	1	1	1	1	1	22	5	4.4	0.37234	1	1	0	0	1	0	0	1	0	0	0	1	1	0.090057	25	2	25	25	2	25	2
	1	56578418	64632741	1	0	1	1	0	0	0	1	1001	1013.49	21.9	0	1	1	1	1	1	1	19	5	3.8	0.39362	1	1	0	0	1	0	0	1	0	0	0	1	1	0.10447	29	2	29	29	2	29	2
0	1	56578418	64632741	1	1	1	0	0	0	0	0	1019	1019.36	9.9	1	0	0	1	1	1	1	21	5	4.2	0.43	1	1	0	0	0	0	0	0	0	0	0	1	1	0.097262	27	2	27	27	2	27	2
1	1	56578418	64632741	1	0	1	0	0	0	0	1	1418	1475.49	11.2	1	1	1	1	1	1	1	22	5	4.4	0.37234	1	1	0	0	1	0	0	1	0	0	0	1	1	0.090057	25	2	25	25	2	25	2
	1	56578418	64632741	1	0	1	1	0	0	0	1	1782	1793.5	8.9	0	1	1	1	1	1	1	19	5	3.8	0.39362	1	1	0	0	1	0	0	1	0	0	0	1	1	0.10447	29	2	29	29	2	29	2
1	1	56578418	64632741	0	1		1	1	0	1	0	138	132.383	2	1	1	1	1	1	1	1	22	5	4.4	0.37234	1	1	0	0	1	0	0	1	0	0	0	1	1	0.090057	25	2	25	25	2	25	2
	1	56578418	64632741	0	1		1	0	0	1	0	501	505.567	0	0	1	1	1	1	1	1	19	5	3.8	0.39362	1	1	0	0	1	0	0	1	0	0	0	1	1	0.10447	29	2	29	29	2	29	2
0	1	38318848	81725787	1	0	1	1	1	1	1	0	452	449.417	9.9	1	1	0	1	0	1	1	7	3	2.3333	0.5	1	1	0	0	0	0	0	0	0	0	1	1	4	0.14843	25	5	6.25	25	5	25	5
1	1	38318848	81725787	1	0	1	1	0	0	0	1		852.359		1	1	1	1	0	1	1	7	3	2.3333	0.3617	1	1	1	1	1	1	0	1	0	1	0	1	4	0.14249	24	5	6	24	5	24	5
	1	38318848	81725787	1		1	1					1217		0	0	1	1	1	0	1	1	7	3	2.3333	0.41489	1	1	0	0	0	0	0	0	0	0	0	1	3	0.11875	20	5	6.6667	20	5	20	5
0	1	15342521	81631182	1	0	1	0	0	0	0	1		1419.51		1	0	0	1	0	1	0	3	2	1.5	0.53	0	1	0	1	1	0	1	0	0	1	0	1	1	0.080637	13	3	13	13	3	13	3
1	1	15342521	81631182	1	0	1	0	0	0	0	1	1830	1819.38	0	1	1	1	1	0	1	0	3	2	1.5	0.34043	1	1	0	0	1	1	1	1	0	0	0	1	1	0.04342	7	3	7	7	3	7	3
	1	15342521	81631182	1	1	1	1	0	0	0	1	2361	2199.59	238	1	1	1	1	0	1	0	3	2	1.5	0.38298	1	1	0	0	1	0	1	0	0	0	0	1	1	0.049623	8	3	8	8	3	8	3
0	1	55722685	74217435	1	0	1	0	0	0	1	0	713	710.448	9.9	1	0	0	1	0	1	1	4	3	1.3333	0.41	0	1	0	0	0	0	0	0	0	0	1	1	3	0.094004	16	5	5.3333	16	5	16	5
1	1	55722685	74217435	1	1	1	0	0	0	0	1	1114	1115.42	2	1	1	1	1	0	1	1	6	2	3	0.29787	1	1	0	0	1	1	1	1	0	0	0	1	3	0.047002	8	3	2.6667	8	3	8	3
1	1	55722685	74217435	1	1		1	1	0	1	0	358	360.409	2	1	1	1	1	0	1	1	6	2	3	0.29787	1	1	0	0	1	1	1	1	0	0	0	1	3	0.047002	8	3	2.6667	8	3	8	3
0	1	86484315	74217435	0	1	1	0	0	0	1	0	310	309.404	9.9	1	0	0	1	0	1	1	2	2	1	0.52	0	1	0	0	0	0	0	0	0	0	1	1	3	0.094004	16	5	5.3333	16	5	16	5
0	1	87816337	45556436	0	0	1	1	0	0	1	0		699.439		1	0	0	1	0	1	1	3	3	1	0.6		1			0	0	0	0	0		1	1	1	0.12713	12	3	12	12	3	12	3
0	1	84831621	45556436	1	1	1	1	0	0	0	1		807.378		1	0	0	1	0	1	1	3	2	1.5	0.53		1			0	0	0	0	0		1	1	1	0.12713	12	3	12	12	3	12	3
0	1	52454752	33443837	1	0	1	1	1	1	1	0	110	110.587	10.9	0	0	0	1	0	1	1	7	4	1.75	0.45		1			0	0	0	0	0		1	1	1	0.042555	11	1	11	11	1	11	1
1	1	52454752	33443837	1		1	1					517		2	1	1	1	1	0	1	1	5	3	1.6667	0.48936	1	1	0	0	1	1	0	0	0	0	1	1	1	0.019343	5	1	5	5	1	5	1
0	1	52454752	33443837	0	0	1	1	1	0	1	0	441	441.589	10.9	0	0	0	1	0	1	1	7	4	1.75	0.45		1			0	0	0	0	0		1	1	1	0.042555	11	1	11	11	1	11	1
	1	31386725	86165512	1	0		1	1	0	1	0	123	122.416	8.9	1	1	1	1	0	1	1	9	4	2.25	0.39362	1	1	1	1	1	1	0	1	0	0	1	1	3	0.068295	25	4	8.3333	25	4	25	4
0	1	53418611	86165512	0	1	1	1	0	0	0	1	1291	1291.53	10.9	1	0	0	1	0	1	0	11	5	2.2	0.36	0	1	0	1	1	0	0	1	0	0	0	1	3	0.062832	23	4	7.6667	23	4	23	4
1	1	53418611	86165512	0	0	1	1	0	0	0	1		1700.5		0	1	1	1	0	1	0	11	5	2.2	0.31915	1	1	0	0	1	0	0	1	0	0	0	1	3	0.065563	24	4	8	24	4	24	4
	1	53418611	86165512	0	1	1	0	0	0	0	1	2056	2055.44	8.9	1	1	1	1	0	1	0	10	5	2	0.31915	1	1	1	1	1	1	0	1	0	0	1	1	3	0.068295	25	4	8.3333	25	4	25	4
0	1	53418611	86165512	1	0	1	1	1	1	1	0	303	302.55	10.9	1	0	0	1	0	1	0	11	5	2.2	0.36	0	1	0	1	1	0	0	1	0	0	0	1	3	0.062832	23	4	7.6667	23	4	23	4
	1	53418611	86165512	0	0		1	0	0	1	0	286	291.413	8.9	1	1	1	1	0	1	0	10	5	2	0.31915	1	1	1	1	1	1	0	1	0	0	1	1	3	0.068295	25	4	8.3333	25	4	25	4
	1	53418611	86165512	1	0		1	0	0	0	1	1462	1461.41	0	1	1	1	1	0	1	0	10	5	2	0.31915	1	1	1	1	1	1	0	1	0	0	1	1	3	0.068295	25	4	8.3333	25	4	25	4
0	1	83118185	87285551	1	0	1	0	1	0	1	0	493	492.51	9.9	1	0	1	1	0	1	1	8	4	2	0.43	0	1	0	0	1	0	0	1	0	0	0	1	1	0.024123	11	3	11	11	3	11	3
1	1	83118185	87285551	1	0	1	0	0	0	0	1	1135	949.393	196.8	0	1	1	1	0	1	1	9	4	2.25	0.39362	1	1	0	0	0	0	0	0	0	0	0	1	1	0.024123	11	3	11	11	3	11	3
	1	83118185	87285551	1	1	1	1	0	0	0	1		1270.34		1	1	1	1	0	1	1	8	3	2.6667	0.44681	1	1	0	0	1	0	0	1	0	1	0	1	1	0.019737	9	2	9	9	2	9	2
0	1	83118185	87285551	0	0	1	0	0	0	0	1	1238	1237.51	9.9	1	0	1	1	0	1	1	8	4	2	0.43	0	1	0	0	1	0	0	1	0	0	0	1	1	0.024123	11	3	11	11	3	11	3
1	1	83118185	87285551	0	0	1	0	0	0	0	1	1880	1694.4	196.8	0	1	1	1	0	1	1	9	4	2.25	0.39362	1	1	0	0	0	0	0	0	0	0	0	1	1	0.024123	11	3	11	11	3	11	3
	1	83118185	87285551	0	0		1	1	1	1	0	210	204.345	0	1	1	1	1	0	1	1	8	3	2.6667	0.44681	1	1	0	0	1	0	0	1	0	1	0	1	1	0.019737	9	2	9	9	2	9	2
0	1	35437753	87285551	1	1	1	1	0	0	1	0	532	531.53	9.9	1	0	1	1	0	1	0	3	3	1	0.53	0	1	0	0	1	0	0	1	0	0	0	1	1	0.024123	11	3	11	11	3	11	3
	1	57715184	64315724	0			1					774		0	1	1	1	1	0	1	1	7	3	2.3333	0.41489	1	1	0	0	1	1	0	1	0	0	0	1	1	0.10738	15	3	15	15	3	15	3
0	1	72362411	64315724	1			1					576		12.9					0	1	1	3	1	3	0.60638	1	0	0	0	0	0	0	0	0	0	1	1	1	0.10738	15	3	15	15	3	15	3
1	1	72362411	64315724	1	1		1	0	0	0	1	901	903.368	2	0	1	1	0	0	1	1	3	1	3	0.60638	1	1	0	0	1	0	0	1	0	0	0	1	1	0.11454	16	3	16	16	3	16	3
	1	72362411	64315724	1	1		1	0	0	0	1	1307	1304.41	2	1	1	1	1	0	1	1	3	2	1.5	0.60638	1	1	0	0	1	1	0	1	0	0	0	1	1	0.10738	15	3	15	15	3	15	3
1	1	35876221	64315724	1	1		1	1	0	1	0	268	267.468	2	0	1	1	1	0	1	0	5	2	2.5	0.38298	1	1	0	0	1	0	0	1	0	0	0	1	1	0.11454	16	3	16	16	3	16	3
0	1	82618837	53515351	0	1	1	0	1	1	1	0	40	36.4096	9.9	1	1	0	1	0	1	1	4	3	1.3333	0.52	1	1	0	0	0	0	0	0	0	0	1	1	1	0.15472	21	5	21	21	5	21	5
1	1	82618837	53515351	0	1	1	1	1	0	1	0	441	445.422	2	0	1	1	1	1	1	1	5	1	5	0.35106	1	1	1	0	1	0	0	1	0	0	1	1	1	0.081045	11	2	11	11	2	11	2
0	1	82618837	53515351											9.9	1	1	0	1	0	1	1	4	3	1.3333	0.52	1	1	0	0	0	0	0	0	0	0	1	1	1	0.15472	21	5	21	21	5	21	5
0	1	41576412	27368311	1	1	1	1	0	0	1	0	943	943.565	9.9	0	0	0	1	1	1	1	7	2	3.5	0.29	0	0	0	0	1	0	0	1	0	0	1	1	3	0.25901	17	4	5.6667	17	4	17	4
	1	41576412	27368311	1		1	1					1720		0	1	1	1	1	0	1	0	6	2	3	0.24468	1	1	0	0	1	1	0	1	0	1	1	1	3	0.27424	18	5	6	18	5	18	5
0	1	54343453	27368311	1	0	1	0	1	0	1	0		149.576		0	0	0	1	1	1	0	7	2	3.5	0.25	0	0	0	0	1	0	0	1	0	0	1	1	3	0.25901	17	4	5.6667	17	4	17	4
	1	54343453	27368311	1	0	1	0	0	0	0	0	926	925.359	0	1	1	1	1	0	1	1	5	2	2.5	0.38298	1	1	0	0	1	1	0	1	0	1	1	1	3	0.27424	18	5	6	18	5	18	5
0	1	54343453	27368311	1	0	1	0	0	0	1	0		884.578		0	0	0	1	1	1	0	7	2	3.5	0.25	0	0	0	0	1	0	0	1	0	0	1	1	3	0.25901	17	4	5.6667	17	4	17	4
	1	54343453	27368311	1	0	1	0	0	0	0	1		1660.36		1	1	1	1	0	1	1	5	2	2.5	0.38298	1	1	0	0	1	1	0	1	0	1	1	1	3	0.27424	18	5	6	18	5	18	5
	1	54343453	27368311											0	1	1	1	1	0	1	1	5	2	2.5	0.38298	1	1	0	0	1	1	0	1	0	1	1	1	3	0.27424	18	5	6	18	5	18	5
	1	18776325	27368311	0			1					538		0	1	1	1	1	0	1	1	4	2	2	0.41489	1	1	0	0	1	1	0	1	0	1	1	1	3	0.27424	18	5	6	18	5	18	5
0	1	56518228	43538436	1	0	1	0	0	0	0	1	645	636.429	70.1	1	0	0	1	0	1	1	5	3	1.6667	0.67	0	1	0	1	1	0	0	1	0	1	1	1	1	0.08968	11	2	11	11	2	11	2
1	1	56518228	43538436	1	1	1	1	0	0	0	1		1013.49		0	1	1	1	1	1	1	10	2	5	0.34043	1	1	0	0	0	0	0	0	0	0	0	1	1	0.081527	10	1	10	10	1	10	1
0	1	54264827	43538436		1	1	1	1	1	1	0	117	108.436	70.1	1	0	0	1	0	1	1	6	2	3	0.44	0	1	0	1	1	0	0	1	0	1	1	1	1	0.08968	11	2	11	11	2	11	2
	1	16328416	43538436	1	0		1	1	1	1	0	188	190.42	0	0	1	1	1	0	1	1	4	2	2	0.44681	1	1	0	0	1	0	0	1	0	0	1	1	1	0.040763	5	2	5	5	2	5	2
0	1	13652344	63764888	0	1	1	1	0	0	1	0	709	709.66	70.1	1	0	1	1	0	1	1	7	3	2.3333	0.38	0	1	0	0	0	0	0	0	0	0	0	1	3	0.098794	18	4	6	18	4	18	4
1	1	13652344	63764888	0		1	1					1334		148.1	1	1	1	1	0	1	1	6	2	3	0.43617	1	1	0	1	1	1	0	1	0	1	0	1	3	0.10428	19	4	6.3333	19	4	19	4
	1	13652344	63764888	0	0	1	0	0	0	0	1	1499	1536.44	2	1	1	1	1	0	1	1	6	3	2	0.46809	1	1	0	1	1	1	0	1	0	1	0	1	3	0.093306	17	4	5.6667	17	4	17	4
	1	13652344	63764888	0	1		0	0	0	0	1	946	946.431	2	1	1	1	1	0	1	1	6	3	2	0.46809	1	1	0	1	1	1	0	1	0	1	0	1	3	0.093306	17	4	5.6667	17	4	17	4
	1	47225137	63764888	0	1		1	1	0	1	0	422	423.384	2	1	1	1	1	0	1	0	5	2	2.5	0.34043	1	1	0	1	1	1	0	1	0	1	0	1	3	0.093306	17	4	5.6667	17	4	17	4
1	1	23817711	63764888	1	0		0	1	0	1	0	430	412.476	0	1	1	1	1	0	1	0	6	2	3	0.32979	1	1	0	1	1	1	0	1	0	1	0	1	3	0.10428	19	4	6.3333	19	4	19	4
	1	23817711	63764888	1			0					844		29.3	1	1	1	0	0	1	0	5	2	3	0.32979	1	1	0	1	1	1	0	1	0	1	0	1	3	0.093306	17	4	5.6667	17	4	17	4
0	0	34825486	85123384	0	0	1	0	1	0	1	0	185	185.688	70.1	1	0	1	0	0	1	1	6	3	2	0.4	0	1	0	1	1	0	0	1	0	0	1	1	0	0.12851	12	4		12	4	12	4
1	0	27424644	85123384	0	1		1	1	0	1	0	253	249.352	0	0	0	0	0	0	1	0	6	2	3	0.25532	0	1	0	0	1	1	0	1	0	0	1	1	0	0.18206	17	4		17	4	17	4
	0	27424644	85123384	0	1		1	0	0	1	0		639.487		0	0	0	0	0	1	0	4	12	0.33333	0.37234	0	1	0	0	1	0	0	1	0	0	1	1	0	0.064256	6	3		6	3	6	3
	1	26833761	18578747	0	1		1	1	0	1	0	400	400.386	0	1	1	1	1	0	1	0	3	2	1.5	0.45745	1	1	0	0	1	0	0	1	0	0	0	1	1	0.079172	15	4	15	15	4	15	4
1	1	64267678	87825857	1	1		1	0	0	0	1		1078.39		0	1	1	1	0	1	1	6	3	2	0.46809	1	1	0	0	1	0	0	1	0	0	0	1	1		13	3	13	13	3	13	3
	1	64267678	87825857	1	1		0	0	0	0	1		1446.36		0	1	1	1	0	1	1	6	3	2	0.46809	1	1	0	0	1	0	0	1	0	0	0	1	1		18	4	18	18	4	18	4
	1	64267678	87825857	1	1		1	1	1	1	0	176	136.358	2	0	1	1	1	0	1	1	6	3	2	0.46809	1	1	0	0	1	0	0	1	0	0	0	1	1		18	4	18	18	4	18	4
0	1	56463225	87825857	0	1	1	1	1	0	1	0	401	402.402	70.1	1	0	0	1	0	1	1	3	2	1.5	0.6	0	1	0	1	0	0	0	0	0	0	1	1	1		9	3	9	9	3	9	3
	1	56463225	87825857	0	1	1	1	0	0	0	1	1145	1147.35	0	0	1	1	1	0	1	1	3	2	1.5	0.62766	1	1	0	0	1	0	0	1	0	0	0	1	1		18	4	18	18	4	18	4
0	1	71365684	87825857	1	1	1	0	1	0	1	0	339	340.413	70.1	1	0	0	1	0	1	1	3	2	1.5	0.6	0	1	0	1	0	0	0	0	0	0	1	1	1		9	3	9	9	3	9	3
0	1	27586546	87825857	1	1	1	0	0	0	1	0	638	639.424	70.1	1	0	0	1	0	0	0	4	2	2	0.39	0	1	0	1	0	0	0	0	0	0	1	1	1		9	3	9	9	3	9	3
1	1	27586546	87825857	1	1	1	0	0	0	0	0		1015.54		0	1	1	1	1	0	0	4	1	4	0.32979	1	1	0	0	1	0	0	1	0	0	0	1	1		13	3	13	13	3	13	3
	1	27586546	87825857	1	1	1	0	0	0	0	1	1382	1384.38	0	0	1	1	1	0	1	0	5	2	2.5	0.38298	1	1	0	0	1	0	0	1	0	0	0	1	1		18	4	18	18	4	18	4
1	1	27586546	87825857	1	1		0	1	1	1	0		111.606		0	1	1	1	1	0	0	4	1	4	0.32979	1	1	0	0	1	0	0	1	0	0	0	1	1		13	3	13	13	3	13	3
	1	27586546	87825857	1	1		0	1	1	1	0	435	438.373	0	0	1	1	1	0	1	0	5	2	2.5	0.38298	1	1	0	0	1	0	0	1	0	0	0	1	1		18	4	18	18	4	18	4
0	1	76183666	85768346	0	1	1	0	1	0	1	0	329	329.579	70.1	0	1	0	1	0	1	1	3	3	1	0.63	1	1	0	0	1	0	0	1	0	0	0	1	1	0.038086	12	6	12	12	6	12	6
1	1	76183666	85768346	0	1	1	0	0	0	0	1	703	702.515	2	1	1	1	1	0	1	1	5	2	2.5	0.38298	1	1	1	0	0	0	0	0	0	0	0	1	1	0.034912	11	4	11	11	4	11	4
	1	76183666	85768346	0	1	1	0	0	0	0	1	1071	1067.49	0	1	0	1	0	1	1	1	8	2	4	0.34043	1	1	0	0	1	1	1	1	0	0	0	1	1	0.053955	17	4	17	17	4	17	4
0	1	76183666	85768346	0	1	1	0	0	0	0	1	856	853.584	70.1	0	1	0	1	0	1	1	3	3	1	0.63	1	1	0	0	1	0	0	1	0	0	0	1	1	0.038086	12	6	12	12	6	12	6
1	1	76183666	85768346	0	1	1	0	0	0	0	1	1227	1226.51	2	1	1	1	1	0	1	1	5	2	2.5	0.38298	1	1	1	0	0	0	0	0	0	0	0	1	1	0.034912	11	4	11	11	4	11	4
	1	76183666	85768346	0	1	1	0	0	0	0	1		1591.49		1	0	1	0	1	1	1	8	2	4	0.34043	1	1	0	0	1	1	1	1	0	0	0	1	1	0.053955	17	4	17	17	4	17	4
	1	76183666	85768346	0	1		0	1	0	1	0	326	326.492	0	1	0	1	0	1	1	1	8	2	4	0.34043	1	1	0	0	1	1	1	1	0	0	0	1	1	0.053955	17	4	17	17	4	17	4
0	1	16716428	85768346	1	1	1	0	1	0	1	0	120	120.567	70.1	1	0	0	1	0	1	0	4	2	2	0.41	1	1	0	0	1	0	0	1	0	0	0	1	1	0.038086	12	6	12	12	6	12	6
1	1	53852767	85768346	1	1		1	0	0	0	1	680	744.318	2	1	1	1	1	0	1	0	3	1	3	0.53191	1	1	1	0	0	0	0	0	0	0	0	1	1	0.034912	11	4	11	11	4	11	4
	1	53852767	85768346	0	0		0	1	0	1	0	378	376.404	0	1	0	1	0	0	1	0	3	2	1.5	0.39362	1	1	0	0	1	1	1	1	0	0	0	1	1	0.053955	17	4	17	17	4	17	4
0	1	81235133	34278482	1	0	1	0	0	0	0	1	830	828.421	70.1	1	0	0	1	0	1	1	6	2	3	0.47	0	1	0	1	1	0	0	1	0	0	0	1	4	0.040448	20	4	5	20	4	20	4
1	1	81235133	34278482	1	1	1	1	0	0	0	1		1267.32		1	1	1	1	0	1	1	7	3	2.3333	0.41489	1	1	0	0	1	1	0	1	0	0	0	1	2	0.046515	23	4	11.5	23	4	23	4
	1	81235133	34278482	1	1	1	0	0	0	0	1	1601	1571.6	2	0	1	1	1	1	1	1	7	2	3.5	0.38298	1	1	0	0	1	0	0	1	0	1	0	1	1	0.038425	19	3	19	19	3	19	3
1	1	81235133	34278482	0	1		1	1	0	1	0	286	286.328	2	1	1	1	1	0	1	1	7	3	2.3333	0.41489	1	1	0	0	1	1	0	1	0	0	0	1	2	0.046515	23	4	11.5	23	4	23	4
	1	81235133	34278482	0	1		1	0	0	0	1	685	655.599	2	0	1	1	1	1	1	1	7	2	3.5	0.38298	1	1	0	0	1	0	0	1	0	1	0	1	1	0.038425	19	3	19	19	3	19	3
0	1	72662847	34278482	0	1	1	0	1	1	1	0	781	781.498	70.1	1	0	0	1	0	1	1	6	2	3	0.4	0	1	0	1	1	0	0	1	0	0	0	1	4	0.040448	20	4	5	20	4	20	4
1	1	72662847	34278482	0	1	1	0	0	0	0	1	1155	1154.49	2	1	1	1	1	0	1	1	6	2	3	0.31915	1	1	0	0	1	1	0	1	0	0	0	1	2	0.046515	23	4	11.5	23	4	23	4
	1	72662847	34278482	1	1		0	1	1	1	0	97	92.5368	0	0	1	1	1	1	1	1	7	1	7	0.30851	1	1	0	0	1	0	0	1	0	1	0	1	1	0.038425	19	3	19	19	3	19	3
0	0	38616436	18512351	0	0	1	0	0	0	0	1	1133	1131.45	70.1	1	0	0	1	0	1	1	9	3	3	0.36	0	1	0	1	0	0	0	0	0	0	1	1	1		16	2	16	16	2	16	2
0	0	16172512	18512351	0	0	1	1	0	0	0	0	876	875.466	70.1	1	0	0	1	0	1	1	5	3	1.6667	0.42	0	1	0	1	0	0	0	0	0	0	1	1	1		16	2	16	16	2	16	2
1	1	66326848	56538136	0	0		1	0	0	0	1	1273	1275.41	35	1	1	1	1	1	1	1	10	3	3.3333	0.39362	1	1	1	1	0	0	0	0	0	0	1	1	2	0.10634	24	5	12	24	5	24	5
	1	66326848	56538136	0			1					1710		29.3	0	1	1	1	1	1	1	11	3	3.6667	0.39362	1	1	1	0	1	0	0	1	0	0	0	1	2	0.093044	21	5	10.5	21	5	21	5
0	1	67244828	56538136	1	1	1	1	0	0	0	1	1013	1011.66	70.1	1	1	1	1	0	1	0	4	3	1.3333	0.48	1	1	0	1	1	0	0	1	0	0	1	1	2	0.093044	21	4	10.5	21	4	21	4
1	1	67244828	56538136	1	1	1	1	0	0	0	1	1419	1420.4	35	1	1	1	1	0	1	1	4	2	2	0.30851	1	1	1	1	0	0	0	0	0	0	1	1	2	0.10634	24	5	12	24	5	24	5
	1	67244828	56538136	1	1	1	1	0	0	0	1	1798	1796.58	2	0	1	1	1	0	1	1	4	2	2	0.52128	1	1	1	0	1	0	0	1	0	0	0	1	2	0.093044	21	5	10.5	21	5	21	5
1	1	67244828	56538136	0	1		1	1	0	1	0	415	416.293	35	1	1	1	1	0	1	1	4	2	2	0.30851	1	1	1	1	0	0	0	0	0	0	1	1	2	0.10634	24	5	12	24	5	24	5
	1	67244828	56538136	0	1		1	0	0	0	1	795	793.586	2	0	1	1	1	0	1	1	4	2	2	0.52128	1	1	1	0	1	0	0	1	0	0	0	1	2	0.093044	21	5	10.5	21	5	21	5
0	1	71885416	56538136	1	0	1	1	0	0	0	1	1087	1088.4	70.1	1	1	1	1	0	0	0	5	3	1.6667	0.36	1	1	0	1	1	0	0	1	0	0	1	1	2	0.093044	21	4	10.5	21	4	21	4
	1	66261253	56538136	1	1		1	1	0	1	0	359	358.349	2	0	1	1	1	0	1	1	5	2	2.5	0.45745	1	1	1	0	1	0	0	1	0	0	0	1	2	0.093044	21	5	10.5	21	5	21	5
1	1	66213163	56538136	0	1		1	0	0	0	1			35	1	1	1	1	0	1	1	3	4	0.75	0.61702	1	1	1	1	0	0	0	0	0	0	1	1	2	0.10634	24	5	12	24	5	24	5
0	1	22464312	83725576	1	1	1	0	0	0	0	1	1043	1041.41	70.1	1	0	0	0	0	1	1	9	3	3	0.3	0	1	0	0	1	0	0	1	0	0	0	0	0	0.078178				19	3
1	1	22464312	83725576	1	0	1	1	0	0	0	1	1415	1417.39	2	1	1	1	0	1	1	0	7	2	3.5	0.30851	1	1	0	0	1	0	0	1	0	0	1	1	0	0.094636	23	5		23	5	23	5
	1	22464312	83725576	1	1	1	0	0	0	0	1	1779	1782.31	0	0	1	1	0	1	1	0	10	2	5	0.28723	1	1	0	0	1	0	0	1	0	0	0	1	0	0.10698	26	5		26	5	26	5
1	1	71172762	83725576	0	1		1	1	0	1	0	349	348.349	2	1	1	1	0	1	1	0	9	2	4.5	0.20213	1	1	0	0	1	0	0	1	0	0	1	1	0	0.094636	23	5		23	5	23	5
	1	71172762	83725576	0	1		0	0	0	1	0	714	717.324	0	0	1	1	0	1	1	0	10	2	5	0.28723	1	1	0	0	1	0	0	1	0	0	0	1	0	0.10698	26	5		26	5	26	5
1	1	55243157	34665148	1	0		1	0	0	0	0	580	581.403	2	1	1	1	1	0	0	1	3	4	0.75	0.57447	1	1	0	0	1	0	1	0	0	0	1	1	1	0.04341	13	2	13	13	2	13	2
	1	55243157	34665148	1	0		0	0	0	0	1	943	1256.43	0	0	1	1	1	0	1	1	12	4	3	0.39362	1	1	0	0	0	0	0	0	0	0	0	1	2	0.040071	12	1	6	12	1	12	1
0	1	73656685	26712364	1	0	1	1	0	0	0	1	1395	1394.45	70.1	1	0	1	1	0	1	0	4	2	2	0.48	0	1	0	1	1	0	0	1	0	0	1	1	1	0.022746	8	2	8	8	2	8	2
1	1	73656685	26712364	1	0	1	1	0	0	0	1		1774.41		1	1	1	1	0	1	0	5	3	1.6667	0.41489	1	1	0	0	0	0	0	0	0	0	0	1	1	0.036963	13	2	13	13	2	13	2
	1	73656685	26712364	1	1	1	1	0	0	0	1	2134	2133.58	0	0	1	1	1	0	1	1	6	2	3	0.46809	1	1	0	0	1	0	0	1	0	0	0	1	1	0.036963	13	4	13	13	4	13	4
0	1	33744536	15326175	1	0	1	0	0	0	0	1		740.515		1	0	0	1	0	1	1	6	3	2	0.47	0	1	0	1	1	0	0	1	0	1	0	1	2	0.06874	19	4	9.5	19	4	19	4
1	1	33744536	15326175	1	0	1	1	0	0	0	1	1145	1139.48	35	1	1	1	1	0	1	1	8	3	2.6667	0.39362	1	1	0	0	1	0	0	1	0	0	0	1	2	0.072358	20	4	10	20	4	20	4
	1	33744536	15326175	1	0	1	0	0	0	0	1	1523	1524.6	2	0	1	1	1	0	1	1	5	3	1.6667	0.48936	1	1	0	0	1	0	0	1	0	0	0	1	2	0.065122	18	4	9	18	4	18	4
0	1	32736253	15326175	0	1	1	1	0	0	0	1	836	840.525	70.1	1	0	0	1	0	1	1	8	4	2	0.43	0	1	0	1	1	0	0	1	0	1	0	1	2	0.06874	19	4	9.5	19	4	19	4
	1	32736253	15326175	0	1	1	0	0	0	0	1	1623	1624.6	2	0	1	1	1	0	1	1	9	4	2.25	0.39362	1	1	0	0	1	0	0	1	0	0	0	1	2	0.065122	18	4	9	18	4	18	4
1	1	32736253	15326175	1	1		1	1	1	1	0	167	166.575	35	1	1	1	1	0	1	1	8	4	2	0.39362	1	1	0	0	1	0	0	1	0	0	0	1	2	0.072358	20	4	10	20	4	20	4
	1	32736253	15326175	1	1		0	0	0	1	0	550	551.609	2	0	1	1	1	0	1	1	9	4	2.25	0.39362	1	1	0	0	1	0	0	1	0	0	0	1	2	0.065122	18	4	9	18	4	18	4
	1	32736253	15326175	0	1		0	1	0	1	0	357	358.614	2	0	1	1	1	0	1	1	9	4	2.25	0.39362	1	1	0	0	1	0	0	1	0	0	0	1	2	0.065122	18	4	9	18	4	18	4
	1	34211445	33236573	1	1		0	1	1	1	0	85	90.4672	0	1	1	1	1	0	1	1	11	6	1.8333	0.37234	1	1	0	0	1	0	0	1	0	0	0	1	1	0.034427	11	1	11	11	1	11	1
0	0	46334568	71852435	0	0	1	0	0	0	0	1	1119	1118.39	70.1	1	0	0	1	0	1	1	5	3	1.6667	0.46	0	1	0	1	0	0	0	0	0	0	1	1	0	0.034189	9	3		9	3	9	3
1	0	46334568	71852435	0	0	1	0	1	0	0	1		1571.49		1	0	0	0	0	1	1	4	2	2	0.41489	0	1	0	1	1	1	0	1	0	0	0	1	0	0.049383	13	4		13	4	13	4
	0	46334568	71852435	0	0	1	0	0	0	0	1		1979.53		0	0	1	0	0	1	1	4	2	2	0.43617	0	1	0	0	1	0	0	1	0	0	0	1	0	0.041786	11	3		11	3	11	3
1	0	12734644	71852435											0	1	0	0	0	1	1	1	4	1	4	0.48936	0	1	0	1	1	1	0	1	0	0	0	1	0	0.049383	13	4		13	4	13	4
0	0	83583385	64547551		1	1	1	0	0	1	0	131	135.438	0	1	0	1	1	0	1	1	3	2	1.5	0.6	0	1	0	0	0	0	0	0	0	0	0	1	1	0.055344	14	4	14	14	4	14	4
1	0	83583385	64547551	0	0		0	1	0	0	1	352	352.412	0	0	0	0	1	0	1	1	4	3	1.3333	0.55319	0	1	0	1	1	0	0	1	0	0	0	1	1	0.063251	16	4	16	16	4	16	4
	0	83583385	64547551	0	1		0	0	0	0	1	762	762.436	29.3	0	0	0	1	0	1	1	5	2	2.5	0.42553	0	1	0	0	1	0	0	1	0	1	0	1	1	0.055344	14	4	14	14	4	14	4
	0	88734845	64547551	0	1		1	1	1	1	0	64	125.424	2	0	0	0	1	0	1	1	4	2	2	0.52128	0	1	0	0	1	0	0	1	0	1	0	1	1	0.055344	14	4	14	14	4	14	4
	0	28582743	64547551	0	0		0	0	0	1	0	280	281.399	29.3	0	0	0	1	0	1	1	5	2	2.5	0.42553	0	1	0	0	1	0	0	1	0	1	0	1	1	0.055344	14	4	14	14	4	14	4
0	1	78532678	41478771	1	1	1	0	0	0	1	0	1021	1021.49	0	1	0	0	1	0	1	1	7	5	1.4	0.34	0	1	0	0	1	0	0	1	0	0	0	1	1	0.1154	7	1	7	7	1	7	1
1	1	78532678	41478771	1	0	1	0	0	0	0	1	1442	1442.53	35	0	1	1	1	0	1	1	9	4	2.25	0.32979	1	0	0	0	1	0	0	1	0	0	0	1	1	0.24729	15	3	15	15	3	15	3
1	1	78532678	41478771	1	0		0	1	1	1	0		215.535		0	1	1	1	0	1	1	9	4	2.25	0.32979	1	0	0	0	1	0	0	1	0	0	0	1	1	0.24729	15	3	15	15	3	15	3
	1	78532678	41478771	1	0		0	0	0	0	1	595	849.337	2	0	1	1	1	0	1	1	10	5	2	0.24468	1	0	0	0	0	0	0	0	0	0	0	1	1	0.19784	12	2	12	12	2	12	2
0	1	47345855	63881862	1	0	1	0	1	0	1	0	424	424.428	0	1	0	1	1	0	1	1	12	5	2.4	0.43	1	1	0	1	1	1	1	1	0	0	1	1	2	0.13912	16	4	8	16	4	16	4
	1	47345855	63881862	1	1	1	1	0	0	0	1		1222.48		1	1	1	1	0	1	1	9	4	2.25	0.39362	1	1	0	0	1	1	1	1	0	0	0	1	1	0.078257	9	1	9	9	1	9	1
0	1	47345855	63881862	1	1	1	1	0	0	1	0	633	633.437	0	1	0	1	1	0	1	1	12	5	2.4	0.43	1	1	0	1	1	1	1	1	0	0	1	1	2	0.13912	16	4	8	16	4	16	4
1	1	47345855	63881862	0	0		1	0	0	1	0	211	449.732	35	1	1	1	1	0	1	1	12	5	2.4	0.39362	1	1	1	1	1	1	1	1	0	0	0	1	1	0.10434	12	1	12	12	1	12	1
0	1	32781117	38852464	1	1	1	0	0	0	1	0		222.393		1	0	0	1	0	1	1	4	2	2	0.55	0	1	0	0	1	0	0	1	0	1	0	1	1	0.041631	14	3	14	14	3	14	3
0	1	48586735	38852464	0	0	1	1	0	0	0	1	766	770.402	0	1	0	0	0	1	1	1	8	2	4	0.36	0	1	0	0	1	0	0	1	0	1	0	1	1	0.041631	14	3	14	14	3	14	3
1	1	48586735	38852464	0		1	1				0	1250	1192.46	37.1	0	1	1	1	0	1	1	7	3	2.3333	0.41489	1	1	0	0	1	0	0	1	0	0	0	1	1	0.03271	11	3	11	11	3	11	3
0	1	48586735	38852464	0	0	1	1	0	0	0	1	1045	1049.4	0	1	0	0	0	1	1	1	8	2	4	0.36	0	1	0	0	1	0	0	1	0	1	0	1	1	0.041631	14	3	14	14	3	14	3
1	1	48586735	38852464	0	0	1	1	0	0	0	1		1471.47		0	1	1	1	0	1	1	7	3	2.3333	0.41489	1	1	0	0	1	0	0	1	0	0	0	1	1	0.03271	11	3	11	11	3	11	3
	1	48586735	38852464	0	0	1	1	0	0	0	1		1793.58		0	1	1	1	1	1	1	8	2	4	0.39362	1	1	0	0	1	0	0	1	0	0	0	1	1	0.038657	13	3	13	13	3	13	3
0	1	68226565	78228716	1	1	1	0	0	0	0	1	757	757.466	7.9	1	0	1	1	0	1	0	6	3	2	0.37	0	1	0	1	1	0	1	1	0	1	1	1	2	0.043016	13	5	6.5	13	5	13	5
0	1	26518162	78228716	0	1	1	0	0	0	1	0	531	531.479	7.9	0	0	1	1	1	1	0	12	3	4	0.36	0	1	0	1	1	0	1	1	0	1	1	1	2	0.043016	13	5	6.5	13	5	13	5
1	1	26518162	78228716	0	0	1	0	0	0	0	1	1060	936.377	97.8	1	1	1	1	0	1	1	7	3	2.3333	0.41489	1	1	0	0	1	0	1	1	0	0	0	1	3	0.052943	16	5	5.3333	16	5	16	5
	1	26518162	78228716	0	0	1	1	0	0	0	1		1334.31		1	1	1	1	0	1	1	7	3	2.3333	0.41489	1	1	0	0	1	0	1	1	0	0	1	1	1	0.052943	16	5	16	16	5	16	5
0	1	26518162	78228716	1	1	1	0	0	0	0	1	1009	1009.48	7.9	0	0	1	1	1	1	0	12	3	4	0.36	0	1	0	1	1	0	1	1	0	1	1	1	2	0.043016	13	5	6.5	13	5	13	5
1	1	26518162	78228716	1	0	1	0	0	0	0	1	1538	1414.38	97.8	1	1	1	1	0	1	1	7	3	2.3333	0.41489	1	1	0	0	1	0	1	1	0	0	0	1	3	0.052943	16	5	5.3333	16	5	16	5
0	1	14311544	34581322	0	0	1	1	1	0	1	0		159.414		1	0	1	1	0	1	1	9	4	2.25	0.43	0	1	0	1	0	0	0	0	0	0	0	1	2	0.17056	33	4	16.5	33	4	33	4
1	1	14311544	34581322	0	1	1	1	0	0	0	1	687	561.442	97.8	1	1	1	1	1	1	0	7	2	3.5	0.19149	1	1	1	0	1	0	0	1	0	1	1	1	2	0.12922	25	4	12.5	25	4	25	4
	1	14311544	34581322	0	1	1	1	0	0	0	1	953	952.376	2	1	1	1	1	1	1	0	10	3	3.3333	0.095745	1	1	0	0	1	0	0	1	0	0	0	1	2	0.10337	20	4	10	20	4	20	4
0	1	57264751	34581322	0	0	1	0	1	0	1	0	232	232.426	0	1	0	1	1	1	1	1	16	4	4	0.43	0	1	0	1	0	0	0	0	0	0	0	1	2	0.17056	33	4	16.5	33	4	33	4
1	1	57264751	34581322	0	0	1	1	0	0	1	0	757	635.366	97.8	1	1	1	1	0	1	1	2	3	0.66667	0.71277	1	1	1	0	1	0	0	1	0	1	1	1	2	0.12922	25	4	12.5	25	4	25	4
	1	57264751	34581322	0	0	1	0	0	0	0	1	1025	1290.52	2	1	1	1	1	1	1	1	14	4	3.5	0.44681	1	1	0	0	1	0	0	1	0	0	0	1	2	0.10337	20	4	10	20	4	20	4
0	1	57264751	34581322	1	0	1	1	0	0	1	0	757	757.433	0	1	0	1	1	1	1	1	16	4	4	0.43	0	1	0	1	0	0	0	0	0	0	0	1	2	0.17056	33	4	16.5	33	4	33	4
1	1	57264751	34581322	1	1	1	1	0	0	0	1	1292	1282.39	87.9	1	1	1	1	0	1	1	2	3	0.66667	0.71277	1	1	1	0	1	0	0	1	0	1	1	1	2	0.12922	25	4	12.5	25	4	25	4
	1	57264751	34581322	1	1	1	1	0	0	0	1	1551	1550.35	2	1	1	1	1	1	1	1	14	4	3.5	0.44681	1	1	0	0	1	0	0	1	0	0	0	1	2	0.10337	20	4	10	20	4	20	4
0	1	34328888	34581322	0	1	1	0	1	0	1	0		261.444		1	0	1	1	0	1	1	4	3	1.3333	0.45	0	1	0	1	0	0	0	0	0	0	0	1	2	0.17056	33	4	16.5	33	4	33	4
1	1	34328888	34581322	0	1	1	0	0	0	0	1	663	663.461	0	1	1	1	1	0	1	1	6	3	2	0.40426	1	1	1	0	1	0	0	1	0	1	1	1	2	0.12922	25	4	12.5	25	4	25	4
	1	34328888	34581322	0	1	1	0	0	0	0	1	1054	1054.37	2	1	1	1	1	0	1	1	6	3	2	0.43617	1	1	0	0	1	0	0	1	0	0	0	1	2	0.10337	20	4	10	20	4	20	4
0	0	54137768	26247714	1	0	1	1	0	0	1	0	875	879.455	0	1	0	1	1	0	1	1	5	3	1.6667	0.45	0	1	0	0	0	0	0	0	0	0	0	1	2	0.13555	12	2	6	12	2	12	2
	0	54137768	26247714	1	1		1	0	0	1	0	644	644.382	2	0	0	0	1	1	1	1	10	3	3.3333	0.39362	0	1	0	1	1	0	0	1	0	0	0	1	1	0.067777	6	2	6	6	2	6	2
	0	78145585	26247714	1	0		0	0	0	1	0	358	359.361	2	0	0	0	1	1	1	1	10	2	5	0.3617	0	1	0	1	1	0	0	1	0	0	0	1	1	0.067777	6	2	6	6	2	6	2
	0	78145585	26247714											2	0	0	0	1	1	1	1	10	2	5	0.3617	0	1	0	1	1	0	0	1	0	0	0	1	1	0.067777	6	2	6	6	2	6	2
	0	78145585	26247714	1	0		0	0	0	1	0	404	402.364	2	0	0	0	1	1	1	1	10	2	5	0.3617	0	1	0	1	1	0	0	1	0	0	0	1	1	0.067777	6	2	6	6	2	6	2
0	1	11224271	24435322	1	0	1	0	1	1	1	0		85.4726		1	0	1	1	0	1	1	4	2	2	0.45	0	1	0	0	0	0	0	0	0	0	0	1	1	0.050573	17	5	17	17	5	17	5
1	1	11224271	24435322	1	1	1	0	0	0	1	0	474	515.504	2	0	1	1	1	1	1	1	4	1	4	0.46809	1	1	0	0	1	0	0	1	0	0	0	1	1	0.044623	15	5	15	15	5	15	5
0	1	11224271	24435322	0	0	1	0	0	0	0	1	1135	1132.47	7.9	1	0	1	1	0	1	1	4	2	2	0.45	0	1	0	0	0	0	0	0	0	0	0	1	1	0.050573	17	5	17	17	5	17	5
1	1	11224271	24435322	0	1	1	0	0	0	0	1	1520	1562.52	2	0	1	1	1	1	1	1	4	1	4	0.46809	1	1	0	0	1	0	0	1	0	0	0	1	1	0.044623	15	5	15	15	5	15	5
0	1	41852743	24435322	1	0	1	0	0	0	1	0		1008.48		1	0	1	1	0	1	1	5	2	2.5	0.39	0	1	0	0	0	0	0	0	0	0	0	1	1	0.050573	17	5	17	17	5	17	5
	1	41852743	24435322	1	0	1	0	0	0	0	1	1794	2072.52	2	0	1	1	1	0	1	1	5	2	2.5	0.45745	1	1	0	0	0	0	0	0	0	0	0	1	1	0.029749	10	3	10	10	3	10	3
1	1	41852743	24435322	0	1		0	0	0	1	0	369	656.408	2	0	1	1	1	1	1	1	5	1	5	0.35106	1	1	0	0	1	0	0	1	0	0	0	1	1	0.044623	15	5	15	15	5	15	5
	1	41852743	24435322	0	0		0	0	0	0	1		1044.53		0	1	1	1	0	1	1	5	2	2.5	0.45745	1	1	0	0	0	0	0	0	0	0	0	1	1	0.029749	10	3	10	10	3	10	3
0	1	66645215	81143143	0	1	1	0	1	0	1	0	252	252.424	7.9	1	0	0	1	0	1	1	3	2	1.5	0.63	0	1	0	0	0	0	0	0	0	0	1	1	1	0.053442	9	1	9	9	1	9	1
1	1	66645215	81143143	0	1	1	1	0	0	0	1	642	681.525	2	0	1	1	1	0	1	1	3	2	1.5	0.60638	1	1	0	0	1	0	0	1	0	0	1	1	1	0.047504	8	3	8	8	3	8	3
	1	66645215	81143143	0	1	1	0	0	0	0	1	1052	1051.33	2	1	1	1	1	0	1	1	4	2	2	0.57447	1	1	0	1	1	0	0	1	0	0	1	1	1	0.047504	8	3	8	8	3	8	3
1	1	43751326	81143143	1	1		1	1	0	1	0	438	447.532	35	0	1	1	1	0	1	1	3	2	1.5	0.60638	1	1	0	0	1	0	0	1	0	0	1	1	1	0.047504	8	3	8	8	3	8	3
	1	43751326	81143143	1	1		1	0	0	0	1	818	817.344	2	1	1	1	1	0	1	1	3	2	1.5	0.60638	1	1	0	1	1	0	0	1	0	0	1	1	1	0.047504	8	3	8	8	3	8	3
0	1	76756311	67678141	1	1		1	1	0	1	0	383	376.464	70.1	1	0	0	1	0	1	1	3	2	1.5	0.56	0	1	0	0	0	0	0	0	0	0	0	1	1	0.13903	18	6	18	18	6	18	6
1	1	76756311	67678141	1	1		1	0	0	0	0	766	767.435	2	0	1	1	1	0	1	1	4	2	2	0.52128	1	1	0	0	1	0	0	1	0	0	0	1	1	0.11586	15	5	15	15	5	15	5
	1	76756311	67678141	1	1		1	0	0	0	1	1123	1438.42	0	0	1	1	1	0	1	1	4	2	2	0.52128	1	1	0	0	0	0	0	0	0	0	0	1	1	0.054069	7	2	7	7	2	7	2
0	1	43845117	85171545	1	0	1	1	0	0	1	0	487	487.471	12.9	1	0	1	1	0	1	1	10	5	2	0.4	0	1	0	0	1	1	1	0	0	0	1	1	1		7	1	7	7	1	7	1
1	1	43845117	85171545	1	0	1	0	0	0	0	1	960	871.443	94.5	0	1	1	1	0	1	0	4	2	2	0.42553	1	1	0	0	1	1	1	1	0	0	0	1	1		6	2	6	6	2	6	2
	1	43845117	85171545	1	0	1	1	0	0	0	0	1286	1201.33	31.3	0	1	1	1	0	1	1	5	5	1	0.48936	1	1	0	0	1	1	1	1	0	0	1	1	1		5	1	5	5	1	5	1
0	1	43845117	85171545	0	0	1	1	0	0	1	0	1048	1048.47	12.9	1	0	1	1	0	1	1	10	5	2	0.4	0	1	0	0	1	1	1	0	0	0	1	1	1		7	1	7	7	1	7	1
1	1	43845117	85171545	0	0	1	0	0	0	0	1	1521	1432.45	94.5	0	1	1	1	0	1	0	4	2	2	0.42553	1	1	0	0	1	1	1	1	0	0	0	1	1		6	2	6	6	2	6	2
	1	43845117	85171545	0	0	1	1	0	0	0	1		1762.34		0	1	1	1	0	1	1	5	5	1	0.48936	1	1	0	0	1	1	1	1	0	0	1	1	1		5	1	5	5	1	5	1
0	1	12882657	35266388	0	0	1	1	1	0	1	0	343	343.422	7.9	1	0	0	0	0	1	1	4	3	1.3333	0.51	0	0	0	0	0	0	0	0	0	0	0	1	1	0.04358	11	3	11	11	3	11	3
1	1	12882657	35266388	0	1		1	1	0	1	0	139	132.453	35	1	1	1	0	0	1	0	3	2	1.5	0.53191	1	1	1	0	1	0	0	1	0	0	0	1	0	0.047542	12	3		12	3	12	3
	1	12882657	35266388	0	1		1	0	0	1	0	506	508.543	2	0	0	1	1	0	1	1	3	2	1.5	0.60638	1	1	0	0	0	0	0	0	0	0	0	1	1	0.04358	11	3	11	11	3	11	3
0	1	18132543	64188553	1	0	1	1	0	0	1	0		862.426		1	0	1	0	1	1	1	7	2	3.5	0.42	0	1	0	1	1	0	0	0	1	0	1	1	0	0.085017	11	4		11	4	11	4
	1	18132543	64188553	1	1	1	1	0	0	0	1	1619	1620.61	0	0	1	1	0	0	1	1	9	3	3	0.28723	1	1	0	0	1	1	0	0	0	0	0	1	0	0.13139	17	3		17	3	17	3
0	1	18132543	64188553		0	1	0	0	0	1	0			7.9	1	0	1	0	1	1	1	7	2	3.5	0.42	0	1	0	1	1	0	0	0	1	0	1	1	0	0.085017	11	4		11	4	11	4
1	1	18132543	64188553	1	0		1	0	0	0	1	905	906.331	2	0	1	1	0	1	1	1	7	2	3.5	0.38298	1	1	0	0	1	0	0	1	0	0	0	1	0	0.1082	14	4		14	4	14	4
	1	18132543	64188553	1	0		0	0	0	0	1	1358	1276.49	30.5	0	1	1	0	0	1	1	9	3	3	0.28723	1	1	0	0	1	1	0	0	0	0	0	1	0	0.13139	17	3		17	3	17	3
0	1	77836123	21214588	0	0	0	1	1	0	1	0	308	306.399	7.9	1	0	0	1	0	1	1	6	3	2	0.5	0	1	0	0	1	0	1	1	0	1	1	1	1	0.035943	17	6	17	17	6	17	6
1	1	77836123	21214588	0	0	0	0	0	0	0	1	732	733.3	35	1	1	1	1	0	1	1	6	3	2	0.46809	1	1	1	0	1	0	1	1	0	0	1	1	1	0.031715	15	4	15	15	4	15	4
	1	77836123	21214588	0	0	0	0	0	0	0	1	1106	1109.37	2	1	1	1	1	0	1	1	7	3	2.3333	0.41489	1	1	1	0	1	0	1	1	0	0	1	1	1	0.025372	12	3	12	12	3	12	3
0	1	77836123	21214588	0	0	1	1	0	0	0	1	1138	1138.41	7.9	1	0	0	1	0	1	1	6	3	2	0.5	0	1	0	0	1	0	1	1	0	1	1	1	1	0.035943	17	6	17	17	6	17	6
1	1	77836123	21214588	0	0	1	0	0	0	0	1		1565.3		1	1	1	1	0	1	1	6	3	2	0.46809	1	1	1	0	1	0	1	1	0	0	1	1	1	0.031715	15	4	15	15	4	15	4
	1	77836123	21214588	0	0	1	0	0	0	0	1	1940	1941.38	2	1	1	1	1	0	1	1	7	3	2.3333	0.41489	1	1	1	0	1	0	1	1	0	0	1	1	1	0.025372	12	3	12	12	3	12	3
1	1	77836123	21214588	1	1		1	1	0	1	0	109	109.353	35	1	1	1	1	0	1	1	6	3	2	0.46809	1	1	1	0	1	0	1	1	0	0	1	1	1	0.031715	15	4	15	15	4	15	4
	1	77836123	21214588	1	0		0	0	0	1	0	484	487.377	2	1	1	1	1	0	1	1	7	3	2.3333	0.41489	1	1	1	0	1	0	1	1	0	0	1	1	1	0.025372	12	3	12	12	3	12	3
0	1	81243614	21214588	1	1	1	0	0	0	0	1	870	865.678	70.1	1	0	0	1	0	1	1	3	2	1.5	0.56	0	1	0	0	1	0	1	1	0	1	1	1	1	0.035943	17	6	17	17	6	17	6
1	1	14847372	21214588	0	1		0	0	0	1	0	715	715.364	35	1	1	1	0	0	1	1	3	3	1	0.48936	1	1	1	0	1	0	1	1	0	0	1	1	1	0.031715	15	4	15	15	4	15	4
1	1	78227433	21214588	1	1		0	0	0	0	1	914	913.392	35	1	1	1	0	0	1	1	3	3	1	0.45745	1	1	1	0	1	0	1	1	0	0	1	1	1	0.031715	15	4	15	15	4	15	4
	1	17533687	21214588	0	1		0	0	0	0	1	904	904.468	2	1	1	1	1	0	1	1	3	2	1.5	0.41489	1	1	1	0	1	0	1	1	0	0	1	1	1	0.025372	12	3	12	12	3	12	3
0	1	87436431	32246655	1	1	1	1	0	0	0	1	1468	1468.45	7.9	1	0	0	0	0	1	1	6	3	2	0.5	0	1	0	1	0	0	0	0	0	1	0	1	0	0.088696	13	3		13	3	13	3
1	1	87436431	32246655	1	1	1	1	0	0	0	1	1900	1900.37	35	1	1	1	1	0	1	1	6	4	1.5	0.43617	1	1	0	0	1	0	0	1	0	0	1	1	1	0.088696	13	3	13	13	3	13	3
	1	87436431	32246655	1		1	1					2325		36.4	0	1	1	1	0	1	1	6	4	1.5	0.43617	1	1	0	0	1	0	0	1	0	0	0	1	1	0.081873	12	3	12	12	3	12	3
0	1	77485734	83825341	1	0	1	1	0	0	1	0	936	936.601	13.6	0	0	0	1	1	1	0	10	3	3.3333	0.34	0	1	0	1	1	0	1	1	0	1	1	1	1	0.041792	23	4	23	23	4	23	4
1	1	77485734	83825341	1	0	1	0	0	0	0	1	1121	1122.4	0	0	1	1	1	1	1	0	10	3	3.3333	0.31915	1	1	0	0	1	0	0	1	0	0	0	1	1	0.038158	21	4	21	21	4	21	4
	1	77485734	83825341	1	0	1	0	0	0	0	1	1474	1472.37	0	1	1	1	1	0	1	1	8	3	2.6667	0.39362	1	1	1	1	1	1	0	1	0	0	1	1	3	0.03089	17	4	5.6667	17	4	17	4
0	1	77485734	83825341	1	1	1	1	0	0	0	1	1237	1237.6	13.6	0	0	0	1	1	1	0	10	3	3.3333	0.34	0	1	0	1	1	0	1	1	0	1	1	1	1	0.041792	23	4	23	23	4	23	4
1	1	77485734	83825341	1	0	1	0	0	0	0	1	1422	1423.41	0	0	1	1	1	1	1	0	10	3	3.3333	0.31915	1	1	0	0	1	0	0	1	0	0	0	1	1	0.038158	21	4	21	21	4	21	4
	1	77485734	83825341	1	0	1	0	0	0	0	1	1775	1773.38	0	1	1	1	1	0	1	1	8	3	2.6667	0.39362	1	1	1	1	1	1	0	1	0	0	1	1	3	0.03089	17	4	5.6667	17	4	17	4
0	1	85663417	43712672	1	1	1	1	1	0	1	0	402	402.627	25.4	1	0	1	0	0	1	0	4	3	1.3333	0.51	0	1	0	1	0	0	0	0	0	1	1	1	0	0.079713	32	14		32	14	32	14
1	1	85663417	43712672	1	1	1	1	0	0	0	1	941	942.777	176	1	1	1	1	0	1	0	4	2	2	0.44681	1	1	1	0	1	0	0	1	0	0	1	2	1	0.057294	11.5	7	23	23	14	11.5	7
1	1	85663417	43712672	0	1		1	1	0	1	0	340	347.772	119.1	1	1	1	1	0	1	0	4	2	2	0.44681	1	1	1	0	1	0	0	1	0	0	1	2	1	0.057294	11.5	7	23	23	14	11.5	7
0	1	81463641	43712672	0	1	1	1	0	0	1	0	852	852.639	25.4	1	0	1	1	0	1	0	6	5	1.2	0.4	0	1	0	1	0	0	0	0	0	1	1	1	0	0.079713	32	14		32	14	32	14
1	1	81463641	43712672	0	1	1	1	0	0	0	1	1418	1324.4	96	1	1	1	1	0	1	0	5	2	2.5	0.41489	1	1	1	0	1	0	0	1	0	0	1	2	1	0.057294	11.5	7	23	23	14	11.5	7
0	1	43433871	45318772	0	1	1	1	0	0	0	1	721	721.935	0.5	0	0	0	1	0	1	1	6	2	3	0.48	0	1	0	0	1	0	0	1	0	0	1	1	1	0.08129	16	3	16	16	3	16	3
1	1	22547255	57748575	0	1		0	1	0	1	0		265.551		1	1	1	1	1	1	1	7	2	3.5	0.34043	1	1	0	0	1	0	0	1	0	0	0	1	1	0.051986	15	4	15	15	4	15	4
	1	22547255	57748575	0			0					420		26.1	0	1	1	1	1	1	1	7	1	7	0.38298	1	1	0	0	1	0	0	1	0	0	0	1	2	0.034658	10	3	5	10	3	10	3
	1	22547255	57748575											11.6	0	1	1	1	1	1	1	7	1	7	0.38298	1	1	0	0	1	0	0	1	0	0	0	1	2	0.034658	10	3	5	10	3	10	3
0	1	66674761	62256155	0	1	1	1	0	0	1	0	738	738.548	3.5	1	0	0	1	0	1	0	7	4	1.75	0.53	1	1	0	1	1	1	0	0	0	1	1	1	3	0.073557	18	5	6	18	5	18	5
0	1	38886882	62256155	0	0	1	0	0	0	1	0	704	704.56	3.5	1	1	0	1	0	1	1	3	2	1.5	0.5	1	1	0	1	1	1	0	0	0	1	1	1	3	0.073557	18	5	6	18	5	18	5
1	1	38886882	62256155	0		1	0					1062		0	0	1	1	1	0	0	1	3	1	3	0.39362	1	1	0	0	1	1	0	0	0	0	0	1	2	0.065384	16	5	8	16	5	16	5
1	1	78278148	62256155	0	1		1	1	0	1	0	137	183.475	0	0	1	1	1	0	1	1	5	4	1.25	0.48936	1	1	0	0	1	1	0	0	0	0	0	1	2	0.065384	16	5	8	16	5	16	5
0	1	22873424	67451214	0	0	1	0	1	0	1	0	185	184.506	12.9	1	0	1	1	1	1	1	7	2	3.5	0.45	0	1	0	0	1	0	0	1	0	0	0	1	1	0.055378	11	3	11	11	3	11	3
1	1	22873424	67451214	0	1	1	1	0	0	0	1	552	551.318	35	1	1	1	1	1	1	1	7	2	3.5	0.41489	1	1	0	0	1	1	0	1	0	0	0	1	1	0.03524	7	3	7	7	3	7	3
	1	22873424	67451214	0	1	1	1	0	0	0	0	941	943.589	2	0	1	1	1	0	1	1	8	3	2.6667	0.39362	1	1	0	0	1	1	0	0	0	0	0	1	1	0.075515	15	3	15	15	3	15	3
	1	22873424	67451214	0	1		0	1	0	1	0	482	484.597	2	0	1	1	1	0	1	1	8	3	2.6667	0.39362	1	1	0	0	1	1	0	0	0	0	0	1	1	0.075515	15	3	15	15	3	15	3
0	1	43412481	67451214	1	0	1	1	0	0	0	1		1025.52		1	0	1	1	0	1	1	3	2	1.5	0.56	0	1	0	0	1	0	0	1	0	0	0	1	1	0.055378	11	3	11	11	3	11	3
1	1	43412481	67451214	1	0	1	1	0	0	0	1	1393	1415.44	35	1	1	1	1	0	1	1	7	3	2.3333	0.41489	1	1	0	0	1	1	0	1	0	0	0	1	1	0.03524	7	3	7	7	3	7	3
0	0	62485172	48868563	1	1	1	0	1	1	1	0	78	76.5274	12.9	0	0	0	1	0	1	0	3	2	1.5	0.38	1	1	0	1	0	0	0	0	0	1	0	1	3	0.048108	8	2	2.6667	8	2	8	2
1	0	62485172	48868563	1	1	1	0	0	0	0	1	485	485.553	0	0	0	0	1	0	1	0	3	2	1.5	0.42553	0	1	0	0	1	0	0	1	0	0	1	1	1	0.054122	9	3	9	9	3	9	3
	0	62485172	48868563	1		1	0					1039		198.2	0	0	0	1	0	1	0	3	2	1.5	0.42553	0	1	0	0	1	0	0	1	0	0	0	2	0	0.048108	4	1.5		8	3	4	1.5
0	1	41587245	53835331	0	0	1	0	0	0	1	0	415	414.5	12.9	1	0	0	1	0	1	1	9	3	3	0.43	0	1	1	1	0	0	0	0	0	1	1	1	2	0.065647	13	2	6.5	13	2	13	2
1	1	41587245	53835331	0	1	1	1	0	0	0	1	829	828.582	0	1	1	1	1	0	1	1	6	4	1.5	0.46809	1	1	0	0	1	0	0	1	0	0	1	1	2	0.055548	11	2	5.5	11	2	11	2
0	1	45376381	35544276	0	0	1	0	1	0	1	1	428	428.475	12.9	0	0	0	1	0	1	1	6	3	2	0.65	0	1	0	0	1	0	0	0	1	1	0	1	3	0.094355	34	3	11.3333	34	3	34	3
	1	45376381	35544276	0	0	1	0	0	0	0	1	1161	1162.38	2	1	1	1	1	0	1	1	9	3	3	0.55319	1	1	0	0	1	0	1	1	0	0	0	2	2	0.10546	19	1.5	19	38	3	19	1.5
0	1	45376381	35544276	0	0	1	0	0	0	1	1	906	899.477	12.9	0	0	0	1	0	1	1	6	3	2	0.65	0	1	0	0	1	0	0	0	1	1	0	1	3	0.094355	34	3	11.3333	34	3	34	3
	1	45376381	35544276	0	0	1	0	0	0	0	1		1632.42		1	1	1	1	0	1	1	9	3	3	0.55319	1	1	0	0	1	0	1	1	0	0	0	2	2	0.10546	19	1.5	19	38	3	19	1.5
	1	45376381	35544276	0	0		0	0	0	1	0	328	327.38	2	1	1	1	1	0	1	1	9	3	3	0.55319	1	1	0	0	1	0	1	1	0	0	0	2	2	0.10546	19	1.5	19	38	3	19	1.5
0	1	82773317	35544276	1	1	1	1	1	0	1	0	180	180.487	12.9	0	0	0	1	1	1	1	7	2	3.5	0.39	0	1	0	0	1	0	0	0	1	1	0	1	3	0.094355	34	3	11.3333	34	3	34	3
1	1	82773317	35544276	1	0	1	0	0	0	0	1		566.395		0	1	1	1	1	1	1	7	2	3.5	0.39	0	1	0	0	1	0	0	1	0	0	0	2	1	0.066604	12	1.5	24	24	3	12	1.5
	1	82773317	35544276	1	1	1	1	0	0	0	1	914	914.4	2	1	1	1	1	0	1	1	11	5	2.2	0.39362	1	1	0	0	1	0	1	1	0	0	0	2	2	0.10546	19	1.5	19	38	3	19	1.5
1	1	82773317	35544276	1	1		1	1	1	1	0	104	132.586	0	0	1	1	1	1	1	1	7	2	3.5	0.39	0	1	0	0	1	0	0	1	0	0	0	2	1	0.066604	12	1.5	24	24	3	12	1.5
	1	82773317	35544276	1	1		1	0	0	1	0	480	481.403	2	1	1	1	1	0	1	1	11	5	2.2	0.39362	1	1	0	0	1	0	1	1	0	0	0	2	2	0.10546	19	1.5	19	38	3	19	1.5
0	1	55455733	75517325	0	1	1	0	0	0	1	0	500	501.463	12.9	1	0	0	1	0	1	0	6	2	3	0.4	0	1	0	1	0	0	0	0	0	1	0	1	1	0.12806	38	8	38	38	8	38	8
1	1	55455733	75517325	0	0	1	0	0	0	0	1	1110	995.465	57.1	0	1	1	1	1	1	0	6	1	6	0.34043	1	1	0	0	1	0	0	1	0	0	0	2	1	0.080882	12	3.5	24	24	7	12	3.5
	1	55455733	75517325	0	0	1	0	0	0	0	1	1537	1522.42	59.1	1	1	1	1	0	1	0	5	2	2.5	0.41489	1	1	0	0	0	0	0	0	0	0	0	2	3	0.084252	12.5	4	8.3333	25	8	12.5	4
0	1	55455733	75517325	0	1	1	0	0	0	1	0	633	501.467	20.8	1	0	0	1	0	1	0	6	2	3	0.4	0	1	0	1	0	0	0	0	0	1	0	1	1	0.12806	38	8	38	38	8	38	8
1	1	55455733	75517325	0	0	1	0	0	0	0	1	1110	995.469	57.1	0	1	1	1	1	1	0	6	1	6	0.34043	1	1	0	0	1	0	0	1	0	0	0	2	1	0.080882	12	3.5	24	24	7	12	3.5
	1	55455733	75517325	0	0	1	0	0	0	0	1	1391	1522.42	11.2	1	1	1	1	0	1	0	5	2	2.5	0.41489	1	1	0	0	0	0	0	0	0	0	0	2	3	0.084252	12.5	4	8.3333	25	8	12.5	4
0	1	18733211	75517325	1	1	1	1	1	0	1	0	338	339.485	12.9	1	0	0	1	0	1	1	5	2	2.5	0.49	0	1	0	1	0	0	0	0	0	1	0	1	1	0.12806	38	8	38	38	8	38	8
0	1	88724765	75517325	0	0	1	0	0	0	0	1	844	844.635	12.9	1	0	0	1	1	1	1	7	1	7	0.42	0	1	0	1	0	0	0	0	0	1	0	1	1	0.12806	38	8	38	38	8	38	8
1	1	88724765	75517325	0	0	1	1	0	0	0	1	1338	1341.55	82.9	0	1	1	1	0	1	1	7	3	2.3333	0.41489	1	1	0	0	1	0	0	1	0	0	0	2	1	0.080882	12	3.5	24	24	7	12	3.5
	1	88724765	75517325	0	0	1	0	0	0	0	1	1759	1857.52	215.9	1	1	1	1	0	1	1	5	2	2.5	0.48936	1	1	0	0	0	0	0	0	0	0	0	2	3	0.084252	12.5	4	8.3333	25	8	12.5	4
	1	52568357	75517325	0	1		0	1	0	1	0	106	107.427	48.7	1	1	1	1	0	1	0	5	2	2.5	0.26596	1	1	0	0	0	0	0	0	0	0	0	2	3	0.084252	12.5	4	8.3333	25	8	12.5	4
0	1	56812382	75517325	0	0	1	0	0	0	1	0	323	323.642	12.9	1	0	0	1	0	1	0	3	1	3	0.46	0	1	0	1	0	0	0	0	0	1	0	1	1	0.12806	38	8	38	38	8	38	8
1	1	56812382	75517325	0	1	1	0	0	0	0	1	931	818.474	55.1	0	1	1	1	1	1	0	4	1	4	0.29787	1	1	0	0	1	0	0	1	0	0	0	2	1	0.080882	12	3.5	24	24	7	12	3.5
	1	56812382	75517325	0	1	1	0	0	0	0	1	1338	1336.53	48.7	1	1	1	1	0	1	0	2	2	1	0.45745	1	1	0	0	0	0	0	0	0	0	0	2	3	0.084252	12.5	4	8.3333	25	8	12.5	4
0	1	48117822	35676447	0	1	1	0	1	0	1	0	494	493.577	12.9	0	0	0	1	0	1	0	6	3	2	0.4	0	1	0	1	1	0	0	1	0	1	1	1	1	0.039994	12	3	12	12	3	12	3
0	1	77136567	35676447	0	1	1	1	1	1	1	0	64	63.5913	12.9	0	0	0	1	0	1	0	4	3	1.3333	0.51	0	1	0	1	1	0	0	1	0	1	1	1	1	0.039994	12	3	12	12	3	12	3
1	1	77136567	35676447	0	1	1	1	0	0	1	0	586	591.456	118.9	0	1	1	1	0	1	0	3	3	1	0.53191	1	1	0	0	0	0	0	0	0	0	0	2	2	0.033328	5	2	5	10	4	5	2
	1	77136567	35676447	0	0	1	1	0	0	0	1	982	1070.51	242.1	1	1	1	1	0	1	0	4	3	1.3333	0.47872	1	1	0	0	1	0	0	1	0	1	0	2	3	0.033328	5	2	3.3333	10	4	5	2
1	1	57538248	35676447	1	1		0	0	0	1	0	570	575.462	118.9	0	1	1	1	1	1	0	4	1	4	0.39362	1	1	0	0	0	0	0	0	0	0	0	2	2	0.033328	5	2	5	10	4	5	2
0	1	76751582	48436855	1	0	1	0	1	1	1	0	77	77.5417	0.5	0	0	0	1	1	1	0	8	2	4	0.33	0	1	0	1	1	0	0	1	0	1	1	1	1	0.0689	16	3	16	16	3	16	3
1	1	76751582	48436855	1	1	1	0	1	0	1	0	589	643.368	198.8	0	1	1	1	0	1	1	9	4	2.25	0.39362	1	1	0	0	1	0	0	1	0	0	1	1	1	0.064594	15	3	15	15	3	15	3
	1	76751582	48436855	1	0	1	0	0	0	0	1	616	988.451	194.3	1	1	1	1	0	1	1	8	4	2	0.35106	1	1	0	0	0	0	0	0	0	0	1	1	1	0.043063	10	3	10	10	3	10	3
0	1	76751582	48436855	0	0	1	0	0	0	0	1	1550	1550.54	0.5	0	0	0	1	1	1	0	8	2	4	0.33	0	1	0	1	1	0	0	1	0	1	1	1	1	0.0689	16	3	16	16	3	16	3
	1	76751582	48436855	0	0	1	0	0	0	0	1	2454	2461.45	218.2	1	1	1	1	0	1	1	8	4	2	0.35106	1	1	0	0	0	0	0	0	0	0	1	1	1	0.043063	10	3	10	10	3	10	3
0	1	12223873	48436855	1	1	1	0	0	0	0	1	1091	1091.56	0.5	0	0	0	1	0	1	1	5	2	2.5	0.38	0	1	0	1	1	0	0	1	0	1	1	1	1	0.0689	16	3	16	16	3	16	3
0	1	14736815	51652417	1	1	1	0	0	0	0	1	1411	1409.61	12.9	1	0	0	1	0	1	0	3	2	1.5	0.53	0	1	0	0	0	0	0	0	0	0	1	1	0	0.038067	11	3		11	3	11	3
1	1	14736815	51652417	1	1	1	0	0	0	0	1	1791	1792.38	35	0	1	1	0	0	1	0	3	2	1.5	0.53	1	1	0	0	1	0	0	1	0	0	0	1	0	0.024224	7	3		7	3	7	3
	1	14736815	51652417	1		1	0					2183		35.1	1	1	1	0	0	1	0	4	2	2	0.44681	1	1	0	0	1	1	0	1	0	0	0	1	0	0.041527	12	3		12	3	12	3
1	1	14736815	51652417	1	1		0	0	0	1	0		391.384		0	1	1	0	0	1	0	3	2	1.5	0.53	1	1	0	0	1	0	0	1	0	0	0	1	0	0.024224	7	3		7	3	7	3
	1	14736815	51652417	1	1		0	0	0	0	1	783	782.35	35.1	1	1	1	0	0	1	0	4	2	2	0.44681	1	1	0	0	1	1	0	1	0	0	0	1	0	0.041527	12	3		12	3	12	3
	1	57744662	51652417	1	1		0	0	0	0	1	1122	1121.29	35.1	1	1	1	0	0	1	0	6	2	3	0.3617	1	1	0	0	1	1	0	1	0	0	0	1	0	0.041527	12	3		12	3	12	3
0	1	24512715	53118856	0	1	1	0	1	0	1	0	253	254.324	0	0	0	0	1	0	0	0	4	2	2	0.4	0	1	0	1	0	0	0	0	0	0	0	1	1	0.12061	18	3	18	18	3	18	3
1	1	24512715	53118856	0	1	1	0	0	0	1	0	613	618.513	35	1	1	1	1	0	1	1	4	2	2	0.55319	1	1	0	0	1	0	0	1	0	0	0	1	1	0.087107	13	3	13	13	3	13	3
	1	24512715	53118856	0	0	1	0	0	0	0	1	983	983.356	2	1	1	1	1	0	1	0	4	2	2	0.44681	1	1	0	0	1	0	0	1	0	0	0	1	1	0.11391	17	3	17	17	3	17	3
	1	24512715	53118856											29.3	1	1	1	1	0	1	0	4	2	2	0.44681	1	1	0	0	1	0	0	1	0	0	0	1	1	0.11391	17	3	17	17	3	17	3
0	1	85266614	53118856	1	1	1	0	0	0	1	0	1177	1178.56	12.9	0	0	0	1	0	0	1	7	3	2.3333	0.37	0	1	0	1	0	0	0	0	0	0	0	1	1	0.12061	18	3	18	18	3	18	3
	1	85266614	53118856	1	1	1	0	0	0	0	1	1917	1915.33	2	1	1	1	1	0	1	1	5	2	2.5	0.45745	1	1	0	0	1	0	0	1	0	0	0	1	1	0.11391	17	3	17	17	3	17	3
0	1	66113824	48135655	1	1	1	0	1	0	1	0	299	299.458	12.9	0	0	0	0	0	0	1	6	2	3	0.27	0	1	0	1	0	0	0	0	0	1	1	1	0	0.10039	28	6		28	6	28	6
1	1	66113824	48135655	1	1	1	0	0	0	0	1	788	788.465	82.9	0	1	1	0	0	1	1	5	2	2.5	0.42553	1	1	0	0	1	0	0	1	0	0	1	2	0	0.082463	11.5	3		23	6	11.5	3
	1	66113824	48135655	1	1	1	0	0	0	0	1	1209	1305.48	215.9	1	1	1	0	0	1	1	5	2	2.5	0.42553	1	1	0	0	0	0	0	0	0	1	0	2	1	0.078877	11	3	22	22	6	11	3
0	1	66113824	48135655	1	1	1	0	0	0	0	1	1499	1499.47	12.9	0	0	0	0	0	0	1	6	2	3	0.27	0	1	0	1	0	0	0	0	0	1	1	1	0	0.10039	28	6		28	6	28	6
1	1	66113824	48135655	1	1	1	0	0	0	0	1	1989	1988.47	82.9	0	1	1	0	0	1	1	5	2	2.5	0.42553	1	1	0	0	1	0	0	1	0	0	1	2	0	0.082463	11.5	3		23	6	11.5	3
	1	66113824	48135655	1	1	1	0	0	0	0	1		2505.49		1	1	1	0	0	1	1	5	2	2.5	0.42553	1	1	0	0	0	0	0	0	0	1	0	2	1	0.078877	11	3	22	22	6	11	3
0	1	82155455	48135655	0	1	1	0	0	0	1	0	1068	1068.38	12.9	0	0	0	0	0	0	1	3	1	3	0.43	0	1	0	1	0	0	0	0	0	1	1	1	0	0.10039	28	6		28	6	28	6
0	1	81178176	48135655	1	1	1	0	0	0	1	0	327	327.4	12.9	0	0	0	0	0	0	1	3	2	1.5	0.43	0	1	0	1	0	0	0	0	0	1	1	1	0	0.10039	28	6		28	6	28	6
	1	13477315	48135655	0	1		0	0	0	0	1	928	1018.49	220	1	1	1	0	0	1	1	4	2	2	0.41489	1	1	0	0	0	0	0	0	0	1	0	2	1	0.078877	11	3	22	22	6	11	3
	1	13477315	48135655											220	1	1	1	0	0	1	1	4	2	2	0.41489	1	1	0	0	0	0	0	0	0	1	0	2	1	0.078877	11	3	22	22	6	11	3
0	0	23771737	72281534	1	1	1	1	1	0	1	0	167	167.525	12.9	0	0	0	1	0	1	1	5	2	2.5	0.47	0	1	0	1	1	0	0	1	0	0	1	1	1	0.026764	16	5	16	16	5	16	5
1	0	23771737	72281534	1	1	1	0	0	0	0	1	690	685.419	120.9	1	0	0	1	0	1	1	5	3	1.6667	0.48936	0	1	1	0	1	0	0	1	0	0	1	1	2	0.033455	20	5	10	20	5	20	5
	0	23771737	72281534	1	1	1	1	0	0	0	1	1025	1024.47	68.1	0	0	0	1	0	1	1	5	3	1.6667	0.44681	0	1	0	0	0	0	0	0	0	0	1	1	1	0.036801	22	7	22	22	7	22	7
0	1	37621653	86622883	1	0	1	1	0	0	1	0	1066	1066.5	12.9	1	0	1	1	0	0	1	6	2	3	0.34	1	1	1	1	1	0	0	1	0	1	1	1	2		13	2	6.5	13	2	13	2
1	1	37621653	86622883	1	0	1	0	0	0	0	1	1621	1555.55	198.8	0	1	1	1	0	1	1	7	3	2.3333	0.38298	1	1	0	0	0	0	0	0	0	1	1	1	2		13	3	6.5	13	3	13	3
	1	37621653	86622883	1		1	0					2100		59.1	0	1	0	1	0	1	1	6	3	2	0.46809	1	1	0	0	1	0	0	1	0	0	0	1	1		12	3	12	12	3	12	3
0	1	47544376	86622883	0	1	1	0	0	0	1	0	1116	1115.52	12.9	0	0	1	1	0	0	1	4	2	2	0.44	1	1	1	1	1	0	0	1	0	1	1	1	2		13	2	6.5	13	2	13	2
	1	47544376	86622883	0		1	0					2149		59.1	0	1	0	1	1	1	1	5	1	5	0.34043	1	1	0	0	1	0	0	1	0	0	0	1	1		12	3	12	12	3	12	3
	1	47544376	86622883											242.1	0	1	0	1	1	1	1	5	1	5	0.34043	1	1	0	0	1	0	0	1	0	0	0	1	1		12	3	12	12	3	12	3
0	1	48478574	84251524	0	1	1	0	0	0	1	0	879	878.493	12.9	0	0	0	1	0	1	0	6	2	3	0.4	0	1	0	0	0	0	0	0	0	0	1	0	1	0.048873			14	14	3
	1	48478574	84251524	0	0	1	1	0	0	0	1	1617	1619.42	2	1	1	1	1	0	1	1	3	2	1.5	0.60638	1	1	0	1	1	0	0	1	0	0	0	1	1	0.017455	5	2	5	5	2	5	2
0	1	45763612	66471472	0	1		1	0	0	1	0	1298	1299.44	12.9	0	0	1	1	0	1	1	3	2	1.5	0.53	0	1	0	1	0	0	0	0	0	0	1	1	1	0.045573	18	5	18	18	5	18	5
1	1	45763612	66471472	0	1		1	0	0	0	1	1872	1677.58	176	1	1	1	1	0	1	1	3	2	1.5	0.57447	1	1	0	0	1	1	0	1	0	0	1	1	1	0.048105	19	5	19	19	5	19	5
	1	45763612	66471472	0	1		1	0	0	0	1	2048	2060.5	2	0	1	1	1	0	1	1	4	2	2	0.48936	1	1	0	0	1	0	0	1	0	0	0	1	1	0.050636	20	5	20	20	5	20	5
	1	45763612	66471472	0	1		1	1	1	1	0	250	262.507	2	0	1	1	1	0	1	1	4	2	2	0.48936	1	1	0	0	1	0	0	1	0	0	0	1	1	0.050636	20	5	20	20	5	20	5
1	1	53586682	76576627	1	0	1	0	0	0	1	0	613	485.548	195.3	0	1	1	1	0	1	1	10	4	2.5	0.55319	1	1	0	0	1	0	0	1	0	0	0	1	1	0.038365	11	2	11	11	2	11	2
	1	53586682	76576627	1	0	1	1	0	0	0	1	891	881.457	68.1	1	1	1	1	1	1	1	13	3	4.3333	0.55319	1	1	0	1	1	1	0	0	0	0	0	1	1	0.055803	16	2	16	16	2	16	2
1	1	53586682	76576627	0	0		1	0	0	0	1		738.553		0	1	1	1	0	1	1	10	4	2.5	0.55319	1	1	0	0	1	0	0	1	0	0	0	1	1	0.038365	11	2	11	11	2	11	2
	1	53586682	76576627	0	0		1	0	0	0	1	1275	1134.46	11.6	1	1	1	1	1	1	1	13	3	4.3333	0.55319	1	1	0	1	1	1	0	0	0	0	0	1	1	0.055803	16	2	16	16	2	16	2
0	1	61467575	53423826	1	1	1	0	0	0	0	1		1452.98		0	0	0	1	0	0	0	5	2	2.5	0.33	0	1	0	1	1	0	0	1	0	0	0	1	1	0.064168	19	3	19	19	3	19	3
1	1	61467575	53423826	1	0	1	1	0	0	0	1	1812	1811.55	35	0	1	1	1	0	1	0	4	2	2	0.2766	1	1	0	0	1	0	0	1	0	0	0	2	1	0.043904	6.5	1.5	13	13	3	6.5	1.5
	1	61467575	53423826	1		1	1					2185		2	1	1	1	1	0	1	0	5	3	1.6667	0.38298	1	1	0	0	1	0	0	1	0	0	0	1	1	0.03715	11	3	11	11	3	11	3
0	1	71548175	41256666	1	1	1	1	1	0	1	0	400	400.529	12.9				0	0	1	0	3	1	1.5	0.53191	0	0	0	0	1	1	1	1	0	1	1	1	2	0.082868	21	5	10.5	21	5	21	5
1	1	71548175	41256666	1	0	1	1	0	0	0	1	756	861.586	0	0	1	1	1	0	1	0	3	2	1.5	0.53191	1	1	1	0	1	1	1	0	0	0	1	1	2	0.051299	13	3	6.5	13	3	13	3
	1	71548175	41256666	1	1	1	1	0	0	0	1	1132	1132.39	2	1	1	1	1	0	1	0	3	2	1.5	0.5	1	1	1	0	1	1	1	1	0	0	0	1	2	0.043407	11	3	5.5	11	3	11	3
0	1	72828376	41256666	0	1	1	0	0	0	1	0	783	783.544	12.9	0	0	0	1	0	1	0	6	3	2	0.37	0	0	0	0	1	1	1	1	0	1	1	1	2	0.082868	21	5	10.5	21	5	21	5
	1	34352285	64255431	0	1		1	1	0	1	0	131	128.381	2	1	1	1	1	0	1	1	4	4	1	0.55319	1	1	0	0	1	0	0	1	0	1	1	1	1	0.022837	6	2	6	6	2	6	2
0	1	83455643	64255431	0	1	1	1	0	0	1	0		1143.58		0	0	0	1	0	1	1	3	2	1.5	0.63	1	1	0	0	1	0	0	1	0	0	1	1	1	0.030449	8	3	8	8	3	8	3
	1	33682647	25381218	1	1		0	0	0	0	1	441	508.437	238	0	1	1	0	0	1	1	3	2	1.5	0.60638	1	1	0	0	1	0	0	1	0	0	0	2	0	0.085237	12.5	4.5		25	9	12.5	4.5
0	1	47466522	25381218	0	0	1	0	0	0	1	0	1317	1314.56	0	0	0	1	0	0	0	0	5	2	2.5	0.34	1	1	0	0	1	0	0	1	0	0	0	1	0	0.044323	13	2		13	2	13	2
1	1	47466522	25381218	0	0	1	0	0	0	0	1	1885	1780.61	176	0	1	1	0	1	1	1	5	1	5	0.45745	1	1	0	0	1	0	0	1	0	0	0	2	0	0.081828	12	4.5		24	9	12	4.5
	1	47466522	25381218	0	1	1	0	0	0	0	1	2081	2318.44	35.1	0	1	1	0	0	1	1	5	2	2.5	0.45745	1	1	0	0	1	0	0	1	0	0	0	2	0	0.085237	12.5	4.5		25	9	12.5	4.5
	1	43773831	25381218											238	0	1	1	0	0	1	1	5	2	2.5	0.45745	1	1	0	0	1	0	0	1	0	0	0	2	0	0.085237	12.5	4.5		25	9	12.5	4.5
	1	43773831	25381218	0	0		1	1	0	1	0	77	314.454	35.1	0	1	1	0	0	1	1	5	2	2.5	0.45745	1	1	0	0	1	0	0	1	0	0	0	2	0	0.085237	12.5	4.5		25	9	12.5	4.5
	1	62372363	25381218											238	0	1	1	0				1				1	1	0	0	1	0	0	1	0	0	0	2	0	0.085237	12.5	4.5		25	9	12.5	4.5
1	1	78327744	25381218	0	1		1	0	0	0	1	1052	1091.59	37.1	0	1	1	0	1	1	1	6	1	6	0.40426	1	1	0	0	1	0	0	1	0	0	0	2	0	0.081828	12	4.5		24	9	12	4.5
0	1	74566712	32771763	1	0	1	0	0	0	0	1		1458.6		1	1	1	1	0	0	1	6	2	3	0.42	0	1	0	0	1	0	0	1	0	0	1	1	1	0.10507	20	9	20	20	9	20	9
1	1	74566712	32771763	1			0					436		35	1	1	1	1	0	1	1	4	2	2	0.52128	1	1	0	0	1	0	0	1	0	0	1	2	1	0.063039	6	1	12	12	2	6	1
	1	74566712	32771763	1	0		0	0	0	0	1	826	827.573	35.1	0	1	1	1	0	1	1	5	2	2.5	0.48936	1	1	0	0	0	0	0	0	0	0	0	2	1	0.073546	7	4.5	14	14	9	7	4.5
0	0	11335547	37346586	1	1	1	1	0	0	1	0	1219	1216.41	24.9	0	0	1	1	0	0	0	4	2	2	0.43	0	1	0	1	1	0	0	1	0	0	1	1	1	0.049212	20	8	20	20	8	20	8
	0	12853331	37346586	1	1		1	1	1	1	0	138	140.619	68.1	0	0	1	1	0	1	1	4	2	2	0.52128	0	1	0	0	1	0	1	1	0	0	0	1	2	0.059055	24	8	12	24	8	24	8
1	0	27324186	37346586	0	1		0	1	0	1	0		190.314		0	0	1	1	1	1	1	9	2	4.5	0.25532	0	1	1	1	1	0	1	0	0	0	0	1	2	0.066436	27	9	13.5	27	9	27	9
0	1	82574753	33868116	0	1	1	1	0	0	1	0	505	505.562	12.9	0	0	0	1	1	1	0	10	3	3.3333	0.36	0	1	0	1	1	0	0	1	0	1	1	1	1	0.11046	32	5	32	32	5	32	5
1	1	82574753	33868116	0	1	1	1	0	0	0	1	931	930.256	37.1	0	1	1	0	0	1	1	9	3	3	0.39362	1	1	0	0	1	0	0	1	0	0	0	2	0	0.11046	16	3		32	6	16	3
	1	82574753	33868116	0		1	1					1272		35.1	1	1	1	1	0	1	1	6	3	2	0.46809	1	1	0	0	1	1	0	1	0	1	1	2	1	0.107	15.5	3	31	31	6	15.5	3
0	1	82574753	33868116	1	1	1	1	0	0	1	0	372	372.568	12.9	0	0	0	1	1	1	0	10	3	3.3333	0.36	0	1	0	1	1	0	0	1	0	1	1	1	1	0.11046	32	5	32	32	5	32	5
0	1	15437624	33868116	0	1	1	0	0	0	0	1	901	901.58	12.9	0	0	0	1	0	1	1	3	2	1.5	0.63	0	1	0	1	1	0	0	1	0	1	1	1	1	0.11046	32	5	32	32	5	32	5
1	1	15437624	33868116	0	1	1	0	0	0	0	1	1326	1326.27	37.1	0	1	1	0	0	1	1	4	2	2	0.52128	1	1	0	0	1	0	0	1	0	0	0	2	0	0.11046	16	3		32	6	16	3
	1	15437624	33868116	0	1	1	0	0	0	0	1	1669	1721.4	35.1	1	1	1	1	0	1	1	4	2	2	0.52128	1	1	0	0	1	1	0	1	0	1	1	2	1	0.107	15.5	3	31	31	6	15.5	3
1	1	15437624	33868116	0	1		0	1	0	1	0	253	253.279	37.1	0	1	1	0	0	1	1	4	2	2	0.52128	1	1	0	0	1	0	0	1	0	0	0	2	0	0.11046	16	3		32	6	16	3
	1	15437624	33868116	0	1		0	0	0	0	1	595	648.399	35.1	1	1	1	1	0	1	1	4	2	2	0.52128	1	1	0	0	1	1	0	1	0	1	1	2	1	0.107	15.5	3	31	31	6	15.5	3
0	1	48351342	33868116	0	1	1	1	1	0	1	0	604	601.612	0	0	0	0	1	0	1	1	10	4	2.5	0.43	0	1	0	1	1	0	0	1	0	1	1	1	1	0.11046	32	5	32	32	5	32	5
	1	16113355	28215466											97.1	1	1	1	1	0	1	1	5	3	1.6667	0.48936	1	1	0	0	0	0	0	0	0	0	1	1	2	0.063577	11	2	5.5	11	2	11	2
0	1	76722235	46436752	1	1	1	0	0	0	1	0	887	891.543	12.9	1	0	0	1	0	1	1	8	3	2.6667	0.4	0	1	0	0	0	0	0	0	0	1	1	1	1	0.30208	27	7	27	27	7	27	7
1	1	76722235	46436752	1	1	1	0	0	0	0	1	1255	1256.51	35	0	1	1	1	1	1	1	8	2	4	0.3617	1	1	0	0	1	1	0	0	0	1	0	1	1	0.34684	31	8	31	31	8	31	8
	1	76722235	46436752	1	1	1	1	0	0	0	1	1620	1621.39	2	0	1	1	1	1	1	1	9	2	4.5	0.3617	1	1	1	0	1	1	0	1	0	0	0	1	1	0.33565	30	6	30	30	6	30	6
0	1	76722235	46436752	0	1	1	0	0	0	1	0	890	891.546	0	1	0	0	1	0	1	1	8	3	2.6667	0.4	0	1	0	0	0	0	0	0	0	1	1	1	1	0.30208	27	7	27	27	7	27	7
1	1	76722235	46436752	0	1	1	0	0	0	0	1	1255	1256.52	35	0	1	1	1	1	1	1	8	2	4	0.3617	1	1	0	0	1	1	0	0	0	1	0	1	1	0.34684	31	8	31	31	8	31	8
	1	76722235	46436752	0	1	1	1	0	0	0	1	1620	1621.4	2	0	1	1	1	1	1	1	9	2	4.5	0.3617	1	1	1	0	1	1	0	1	0	0	0	1	1	0.33565	30	6	30	30	6	30	6
	1	76722235	46436752	1	1		1	1	0	1	0	331	332.382	2	0	1	1	1	1	1	1	9	2	4.5	0.3617	1	1	1	0	1	1	0	1	0	0	0	1	1	0.33565	30	6	30	30	6	30	6
0	1	17335133	46436752	0	0	1	1	0	0	0	1		567.482		0	0	0	1	0	1	0	4	2	2	0.48	0	1	0	0	0	0	0	0	0	1	1	1	1	0.30208	27	7	27	27	7	27	7
1	1	17335133	46436752	0	1	1	1	0	0	0	1	930	931.356	35	0	1	1	1	0	1	0	4	2	2	0.47872	1	1	0	0	1	1	0	0	0	1	0	1	1	0.34684	31	8	31	31	8	31	8
	1	17335133	46436752	0	1	1	1	0	0	0	1	1296	1297.37	2	0	1	1	1	0	1	1	4	2	2	0.47872	1	1	1	0	1	1	0	1	0	0	0	1	1	0.33565	30	6	30	30	6	30	6
	1	17335133	46436752	0	1		1	1	0	1	0	345	346.378	2	0	1	1	1	0	1	1	4	2	2	0.47872	1	1	1	0	1	1	0	1	0	0	0	1	1	0.33565	30	6	30	30	6	30	6
0	1	64843247	46436752	0	0	1	0	0	0	0	1	973	973.635	24.9	0	0	0	1	0	1	0	5	2	2.5	0.35	0	1	0	0	0	0	0	0	0	1	1	1	1	0.30208	27	7	27	27	7	27	7
	1	11141464	46436752											363.2	0	1	1	1	0	1	1	6	2	3	0.43617	1	1	1	0	1	1	0	1	0	0	0	1	1	0.33565	30	6	30	30	6	30	6
1	1	11141464	46436752	0	1		1	0	0	0	1	1352	1352.44	190.2	0	1	1	1	0	1	1	6	2	3	0.43617	1	1	0	0	1	1	0	0	0	1	0	1	1	0.34684	31	8	31	31	8	31	8
1	1	65385522	46436752	0	1		0	0	0	0	1	1855	1942.37	35	0	1	1									1	1	0	0	1	1	0	0	0	1	0	1	1	0.34684	31	8	31	31	8	31	8
1	1	65385522	46436752	1	1		0	1	0	1	0	344	437.375	35	0	1	1									1	1	0	0	1	1	0	0	0	1	0	1	1	0.34684	31	8	31	31	8	31	8
1	1	45333326	76658345	1	1		0	1	0	1	0	218	220.508	35	1	1	1	1	1	1	1	4	1	4	0.48936	1	1	0	0	1	0	0	1	0	0	0	1	1	0.053327	11	3	11	11	3	11	3
1	1	45333326	76658345	0	1		0	0	0	0	1	1856	1856.52	35	1	1	1	1	1	1	1	4	1	4	0.48936	1	1	0	0	1	0	0	1	0	0	0	1	1	0.053327	11	3	11	11	3	11	3
	1	72564567	76658345											363.2	0	1	1	1	0	1	1	3	2	1.5	0.60638	1	1	0	0	0	0	0	0	0	0	1	1	1	0.053327	11	3	11	11	3	11	3
	1	72564567	76658345	1	1		0	1	1	1	0	153	154.587	35.1	0	1	1	1	0	1	1	3	2	1.5	0.60638	1	1	0	0	0	0	0	0	0	0	1	1	1	0.053327	11	3	11	11	3	11	3
0	1	57117738	53356712	1	1	1	1	0	0	0	1		1417.7		0	0	0	1	0	1	0	5	3	1.6667	0.45	0	0	0	0	1	0	0	1	0	1	0	1	1	0.017224	9	2	9	9	2	9	2
1	1	23188353	53356712	0										37.1	0	1	1	1	0	1	0	4	3	1.3333	0.42553	1	1	0	0	1	0	0	1	0	0	0	1	1	0.019138	10	2	10	10	2	10	2
	1	23188353	53356712	0	1		1	1	1	1	0	241	244.52	35.1	1	1	1	1	0	1	0	4	3	1.3333	0.42553	1	1	0	0	1	0	0	1	0	0	0	1	1	0.017224	9	2	9	9	2	9	2
0	1	11161886	71426812	0	1	1	1	1	0	1	0	309	309.519	0	1	0	1	0	1	0	0	7	2	3.5	0.3	0	1	0	0	0	0	0	0	0	0	0	1	0	0.075489	18	6		18	6	18	6
1	1	11161886	71426812	0	0	1	1	0	0	0	1	726	726.435	5.1	0	1	1	1	1	1	1	8	2	4	0.39362	1	1	0	0	1	0	0	1	0	0	1	2	1	0.071295	8.5	3	17	17	6	8.5	3
	1	41688576	71426812											105	0	1	1									1	1	0	0	1	0	0	1	0	0	0	2	1	0.083877	10	3	20	20	6	10	3
0	1	21361264	32636857	1	1	1	0	1	0	1	0	415	416.999	0	0	0	1	1	0	0	0	5	2	2.5	0.34	1	1	0	1	1	0	0	1	0	0	1	1	1	0.12206	29	9	29	29	9	29	9
1	1	21361264	32636857	1	1	1	0	0	0	1	0	891	892.586	83.8	0	1	1	1	1	1	0	5	1	5	0.19149	1	1	0	0	1	0	0	1	0	0	0	2	1	0.13048	15.5	4.5	31	31	9	15.5	4.5
0	1	53833255	32636857	1	1	1	1	1	0	1	0	575	576.008	0	0	0	1	1	0	0	0	3	2	1.5	0.48	1	1	0	1	1	0	0	1	0	0	1	1	1	0.12206	29	9	29	29	9	29	9
1	1	53833255	32636857	1	1	1	1	0	0	0	1	1050	1010.46	83.8	0	1	1	1	0	1	1	3	1	3	0.60638	1	1	0	0	1	0	0	1	0	0	0	2	1	0.13048	15.5	4.5	31	31	9	15.5	4.5
	1	53833255	32636857	1	1	1	1	0	0	0	1	1559	1419.47	60.9	1	1	1	1	1	1	1	5	1	5	0.45745	1	1	0	0	1	0	0	1	0	0	0	2	1	0.12627	15	4	30	30	8	15	4
0	1	16728772	32636857	1	0	1	1	1	0	1	0	215	217.016	0	0	0	1	1	0	0	0	5	2	2.5	0.34	1	1	0	1	1	0	0	1	0	0	1	1	1	0.12206	29	9	29	29	9	29	9
1	1	16728772	32636857	1	1	1	1	0	0	0	1	650	651.476	37.1	0	1	1	1	0	1	1	5	2	2.5	0.45745	1	1	0	0	1	0	0	1	0	0	0	2	1	0.13048	15.5	4.5	31	31	9	15.5	4.5
	1	16728772	32636857	1		1	1					1062		80	1	1	1	1	0	1	1	5	2	2.5	0.38298	1	1	0	0	1	0	0	1	0	0	0	2	1	0.12627	15	4	30	30	8	15	4
0	1	81487616	32636857	1	0	1	0	1	0	1	0	191	192.022	0	0	0	1	1	0	0	0	3	2	1.5	0.4	1	1	0	1	1	0	0	1	0	0	1	1	1	0.12206	29	9	29	29	9	29	9
1	1	81487616	32636857	1	0	1	1	0	0	1	0	625	635.549	37.1	0	1	1	1	1	1	0	5	1	5	0.23404	1	1	0	0	1	0	0	1	0	0	0	2	1	0.13048	15.5	4.5	31	31	9	15.5	4.5
	1	81487616	32636857	1	0	1	0	0	0	0	1	1039	1035.47	80	1	1	1	1	1	1	0	4	1	4	0.32979	1	1	0	0	1	0	0	1	0	0	0	2	1	0.12627	15	4	30	30	8	15	4
	1	81487616	32636857	1			1					1018		60.9	1	1	1	1	1	1	0	4	1	4	0.32979	1	1	0	0	1	0	0	1	0	0	0	2	1	0.12627	15	4	30	30	8	15	4
	1	46158382	32636857											60.9	1	1	1	0				2				1	1	0	0	1	0	0	1	0	0	0	2	1	0.12627	15	4	30	30	8	15	4
	1	88443358	38783147											60.9	0	1	1	1	0	1	1	4	2	2	0.52128	1	1	0	0	1	0	0	1	0	0	0	2	4	0.1387	14	3.5	7	28	7	14	3.5
0	1	88382141	38783147	0			1					344		0	1	0	0	1	0	1	1	8	4	2	0.43	0	1	0	0	1	0	1	1	0	0	1	2	1	0.15356	15.5	3	31	31	6	15.5	3
1	1	88382141	38783147	0	0		1	0	0	1	0	928	783.628	195.3	0	1	1	1	0	1	1	8	4	2	0.43	1	1	0	0	1	0	0	1	0	0	0	2	3	0.12879	13	3	8.6667	26	6	13	3
0	1	88382141	38783147	0	0	1	0	1	0	1	0		344.524		1	0	0	1	0	1	1	8	4	2	0.43	0	1	0	0	1	0	1	1	0	0	1	2	1	0.15356	15.5	3	31	31	6	15.5	3
1	1	88382141	38783147	0	0	1	1	0	0	0	1	781	957.305	43.2	0	1	1	1	0	1	1	8	4	2	0.43	1	1	0	0	1	0	0	1	0	0	0	2	3	0.12879	13	3	8.6667	26	6	13	3
0	1	88382141	38783147	0	0	1	0	0	0	0	1	1194	1194.53	0	1	0	0	1	0	1	1	8	4	2	0.43	0	1	0	0	1	0	1	1	0	0	1	2	1	0.15356	15.5	3	31	31	6	15.5	3
1	1	88382141	38783147	0	0	1	0	0	0	0	1	1631	1807.31	43.2	0	1	1	1	0	1	1	8	4	2	0.43	1	1	0	0	1	0	0	1	0	0	0	2	3	0.12879	13	3	8.6667	26	6	13	3
	1	88382141	38783147	0	0		0	0	0	0	1	854	859.48	80	0	1	1	1	0	1	1	9	4	2.25	0.39362	1	1	0	0	1	0	0	1	0	0	0	2	4	0.1387	14	3.5	7	28	7	14	3.5
0	1	65642253	38783147	1	0	1	1	1	0	1	0		357.542		1	0	0	1	0	1	0	5	2	2.5	0.45	0	1	0	0	1	0	1	1	0	0	1	2	1	0.15356	15.5	3	31	31	6	15.5	3
1	1	65642253	38783147	1	1	1	1	0	0	0	1		784.622		0	1	1	1	0	1	1	6	2	3	0.39362	1	1	0	0	1	0	0	1	0	0	0	2	3	0.12879	13	3	8.6667	26	6	13	3
	1	65642253	38783147	1	0	1	0	0	0	0	1	1194	1195.58	80	0	1	1	1	0	1	1	7	3	2.3333	0.41489	1	1	0	0	1	0	0	1	0	0	0	2	4	0.1387	14	3.5	7	28	7	14	3.5
1	1	81826348	63748221	0	1		1	0	0	0	1	641	641.491	89.1	0	1	1	1	0	1	1	8	3	2.6667	0.3617	1	1	0	0	1	0	0	1	0	0	0	2	3	0.084819	13.5	2.5	9	27	5	13.5	2.5
	1	81826348	63748221	0	0		0	0	0	0	1	1032	1037.47	220	0	1	1	1	0	1	1	8	3	2.6667	0.3617	1	1	0	0	0	0	0	0	0	0	0	2	3	0.081677	13	2.5	8.6667	26	5	13	2.5
1	1	81826348	63748221	1	0		1	0	0	0	1	911	911.5	89.1	0	1	1	1	0	1	1	8	3	2.6667	0.3617	1	1	0	0	1	0	0	1	0	0	0	2	3	0.084819	13.5	2.5	9	27	5	13.5	2.5
	1	81826348	63748221	1	0		0	0	0	0	1	1423	1307.48	20	0	1	1	1	0	1	1	8	3	2.6667	0.3617	1	1	0	0	0	0	0	0	0	0	0	2	3	0.081677	13	2.5	8.6667	26	5	13	2.5
1	1	81826348	63748221	0	0		1	0	0	0	1	1576	1576.51	89.1	0	1	1	1	0	1	1	8	3	2.6667	0.3617	1	1	0	0	1	0	0	1	0	0	0	2	3	0.084819	13.5	2.5	9	27	5	13.5	2.5
	1	81826348	63748221	0	0		0	0	0	0	1	1936	1972.49	11.2	0	1	1	1	0	1	1	8	3	2.6667	0.3617	1	1	0	0	0	0	0	0	0	0	0	2	3	0.081677	13	2.5	8.6667	26	5	13	2.5
	1	31327813	63748221	0	1		1	0	0	0	1	1039	1042.5	242.1	0	1	1	1	0	1	1	4	2	2	0.48936	1	1	0	0	0	0	0	0	0	0	0	2	3	0.081677	13	2.5	8.6667	26	5	13	2.5
0	1	51528183	57717644	0	0	1	1	0	0	1	0	522	523.372	0	0	0	0	1	1	1	0	15	4	3.75	0.3	0	1	0	0	0	0	0	0	0	0	1	1	1	0.11067	18	3	18	18	3	18	3
0	1	51528183	57717644	0	1	1	1	0	0	1	0	823	824.38	0	0	0	0	1	1	1	0	15	4	3.75	0.3	0	1	0	0	0	0	0	0	0	0	1	1	1	0.11067	18	3	18	18	3	18	3
1	1	51528183	57717644	0	0	1	1	0	0	0	1	1200	1282.45	35	1	1	1	1	0	1	1	13	5	2.6	0.39362	1	1	0	0	1	0	0	1	0	0	0	1	1	0.079925	13	1	13	13	1	13	1
	1	51528183	57717644	0	0	1	0	0	0	0	1		1554.55		1	1	1	1	1	1	1	14	4	3.5	0.39362	1	1	0	0	1	0	0	1	0	0	1	1	1	0.086073	14	1	14	14	1	14	1
0	1	43282542	88327723	1	0	0	0	0	0	0	1	1185	1186.44	0	1	0	0	1	1	0	0	9	2	4.5	0.28	0	1	0	0	1	0	0	1	0	0	1	1	1	0.13715	16	1	16	16	1	16	1
1	1	43282542	88327723	1	0	0	0	0	0	0	1	1563	1644.48	35	1	1	1	1	1	1	1	8	2	4	0.3617	1	1	0	0	1	0	0	1	0	0	0	1	2	0.13715	16	3	8	16	3	16	3
	1	43282542	88327723	1		0	0					1980		36.4	0	1	1	1	0	1	1	8	3	2.6667	0.39362	1	1	0	0	1	0	0	1	0	0	0	1	2	0.17144	20	3	10	20	3	20	3
0	1	23883711	24758351	1	1		1	1	0	1	0		78.4119		1	0	0	1	0	1	1	8	4	2	0.41		1			0	0	0	0	0		0	1	1	0.09419	16	1	16	16	1	16	1
1	1	23883711	24758351	1	1		1	0	0	1	0	436	436.587	35	0	1	1	1	1	1	1	9	2	4.5	0.39362	1	1	0	0	1	1	0	0	0	0	0	1	1	0.052982	9	1	9	9	1	9	1
0	1	23883711	24758351	1	1	1	1	1	0	1	0	263	264.417	0	1	0	0	1	0	1	1	8	4	2	0.41		1			0	0	0	0	0		0	1	1	0.09419	16	1	16	16	1	16	1
1	1	23883711	24758351	1	1	1	1	0	0	0	1	622	622.594	35	0	1	1	1	1	1	1	9	2	4.5	0.39362	1	1	0	0	1	1	0	0	0	0	0	1	1	0.052982	9	1	9	9	1	9	1
	1	23883711	24758351	1	1	1	1	0	0	0	1	1057	997.519	36.4	0	1	1	1	0	1	1	6	4	1.5	0.46809	1	1	0	0	1	0	0	1	0	0	0	1	1	0.035321	6	1	6	6	1	6	1
0	1	64214868	24487612	0	1	1	0	1	1	1	0	94	93.6311	24.9	0	0	0	1	0	1	0	3	2	1.5	0.53	0	1	0	0	1	0	0	1	0	0	1	1	1	0.096641	15	6	15	15	6	15	6
1	1	26224814	24487612	0	0		0	0	0	1	0	579	588.589	35	0	1	1	1	0	1	0	3	1	3	0.5	1	1	1	0	1	0	0	1	0	0	0	1	1	0.057985	9	3	9	9	3	9	3
1	1	18716457	24487612	1	1		1	0	0	0	1		867.384		0	1	1	1	1	1	0	5	1	5	0.38298	1	1	1	0	1	0	0	1	0	0	0	1	1	0.057985	9	3	9	9	3	9	3
1	1	18716457	24487612	0	1		0	0	0	0	1		1470.39		0	1	1	1	1	1	0	5	1	5	0.38298	1	1	1	0	1	0	0	1	0	0	0	1	1	0.057985	9	3	9	9	3	9	3
0	1	62773534	48543411	0	1	1	1	0	0	1	0	1171	1171.64	0	0	0	0	1	0	1	1	8	3	2.6667	0.58	0	1	0	0	1	0	0	1	0	1	0	1	2	0.045212	14	5	7	14	5	14	5
1	1	62773534	48543411	0	0	1	1	0	0	0	1	1552	1623.59	35	0	1	1	1	0	1	1	7	4	1.75	0.41489	1	1	0	0	1	0	0	1	0	0	0	1	2	0.035524	11	4	5.5	11	4	11	4
1	1	62773534	48543411	0	1		1	1	0	1	0		229.595		0	1	1	1	0	1	1	7	4	1.75	0.41489	1	1	0	0	1	0	0	1	0	0	0	1	2	0.035524	11	4	5.5	11	4	11	4
	1	62773534	48543411	0	1		1	1	0	1	0	513	513.52	2	0	1	1	1	0	1	1	4	4	1	0.55319	1	1	0	0	0	0	0	0	0	0	0	1	1	0.029065	9	4	9	9	4	9	4
0	1	86346233	13446417	0	0	1	0	0	0	0	1		716.386		0	0	0	1	0	0	1	8	3	2.6667	0.35	0	1	0	1	1	0	0	1	0	0	1	1	1	0.071164	9	2	9	9	2	9	2
	1	86346233	13446417	0	0	1	0	0	0	0	1	1483	1484.54	42.2	0	1	1	1	0	1	1	10	6	1.6667	0.39362	1	1	0	0	0	0	0	0	0	0	0	1	1	0.079071	10	1	10	10	1	10	1
0	1	86346233	13446417	1	0	1	0	0	0	0	1	948	949.378	24.9	0	0	0	1	0	0	1	8	3	2.6667	0.35	0	1	0	1	1	0	0	1	0	0	1	1	1	0.071164	9	2	9	9	2	9	2
	1	86346233	13446417											42.2	0	1	1	1	0	1	1	10	6	1.6667	0.39362	1	1	0	0	0	0	0	0	0	0	0	1	1	0.079071	10	1	10	10	1	10	1
1	1	12773521	13446417	1	1		0	1	0	1	0		238.347		0	1	1	1	0	1	1	3	1	3	0.60638	1	1	0	0	1	0	0	1	0	0	0	1	1	0.16605	21	2	21	21	2	21	2
	1	72484124	13446417	1	0		0	0	0	0	1		1114.55		0	1	1									1	1	0	0	0	0	0	0	0	0	0	1	1	0.079071	10	1	10	10	1	10	1
0	0	34465731	66445717	0	1	1	0	0	0	1	0	657	657.555	0	0	0	0	1	0	1	1	6	2	3	0.33	0	0	0	1	1	0	1	1	0	1	1	1	0	0.082485	22	6		22	6	22	6
0	0	55885543	66445717	1	1	1	0	1	0	1	0		236.588		0	0	0	1	0	1	0	3	2	1.5	0.46	0	0	0	1	1	0	1	1	0	1	1	1	0	0.082485	22	6		22	6	22	6
1	0	63346448	66445717	1	1		0	0	0	0	1	1315	1315.48	37.1	1	0	1	0	1	0	0	4	1	4	0.23404	0	0	0	0	1	0	1	1	0	0	0	1	0	0.029995	8	4		8	4	8	4
0	0	14561152	66445717	1	1	1	0	0	0	0	0	771	770.569	24.9	0	0	0	1	0	1	1	3	2	1.5	0.52	0	0	0	1	1	0	1	1	0	1	1	1	0	0.082485	22	6		22	6	22	6
0	1	78775152	38861786	1	0	1	1	0	0	0	1	932	932.632	24.9	0	0	1	1	1	1	1	7	2	3.5	0.58	0	0	0	0	1	0	0	1	0	0	1	1	3	0.03877	17	7	5.6667	17	7	17	7
1	1	78775152	38861786	1	1	1	0	0	0	0	1	1364	1365.35	37.1	1	1	1	1	0	1	1	9	3	3	0.44681	1	1	1	0	1	1	0	0	0	0	0	2	1	0.059295	13	3.5	26	26	7	13	3.5
	1	78775152	38861786	1		1	0					1787		68.1	1	1	1	1	1	1	1	10	3	3.3333	0.55319	1	1	0	0	1	0	0	1	0	0	1	2	4	0.075259	16.5	4	8.25	33	8	16.5	4
0	1	78775152	38861786	0	0	1	1	0	0	0	1	1263	1256.64	24.9	0	0	1	1	1	1	1	7	2	3.5	0.58	0	0	0	0	1	0	0	1	0	0	1	1	3	0.03877	17	7	5.6667	17	7	17	7
1	1	78775152	38861786	0	0	1	0	0	0	0	1	1688	1689.35	37.1	1	1	1	1	0	1	1	9	3	3	0.44681	1	1	1	0	1	1	0	0	0	0	0	2	1	0.059295	13	3.5	26	26	7	13	3.5
	1	78775152	38861786	0		1	0					2102		80	1	1	1	1	1	1	1	10	3	3.3333	0.55319	1	1	0	0	1	0	0	1	0	0	1	2	4	0.075259	16.5	4	8.25	33	8	16.5	4
	1	78631447	38861786											80	1	1	1	1	0	1	0	6	3	2	0.39362	1	1	0	0	1	0	0	1	0	0	1	2	4	0.075259	16.5	4	8.25	33	8	16.5	4
0	1	15442666	17641477	0	0	1	0	0	0	1	0	546	546.586	24.9	0	0	0	1	1	1	0	13	2	6.5	0.31	0	0	0	1	0	0	0	0	0	1	1	1	3	0.14348	31	3	10.3333	31	3	31	3
1	1	15442666	17641477	0		1	0					1000		72.4	1	1	1	1	0	1	1	12	4	3	0.39362	1	1	0	0	1	0	0	1	0	0	1	2	4	0.13422	14.5	1.5	7.25	29	3	14.5	1.5
	1	15442666	17641477	0	1	1	0	0	0	0	1	1397	1392.34	68.1	1	1	1	1	1	1	1	11	2	5.5	0.39362	1	1	0	0	1	0	0	1	0	0	0	2	3	0.11571	12.5	1.5	8.3333	25	3	12.5	1.5
0	1	15442666	17641477	1	1	1	0	0	0	1	0		695.59		0	0	0	1	1	1	0	13	2	6.5	0.31	0	0	0	1	0	0	0	0	0	1	1	1	3	0.14348	31	3	10.3333	31	3	31	3
	1	15442666	17641477	1	1	1	0	0	0	0	1	1553	1541.34	68.1	1	1	1	1	1	1	1	11	2	5.5	0.39362	1	1	0	0	1	0	0	1	0	0	0	2	3	0.11571	12.5	1.5	8.3333	25	3	12.5	1.5
	1	15442666	17641477	0	1		0	0	0	1	0	766	766.342	80	1	1	1	1	1	1	1	11	2	5.5	0.39362	1	1	0	0	1	0	0	1	0	0	0	2	3	0.11571	12.5	1.5	8.3333	25	3	12.5	1.5
0	1	57834715	17641477	0	0	1	0	0	0	1	0	857	857.601	24.9	0	0	0	1	1	1	1	10	3	3.3333	0.28	0	0	0	1	0	0	0	0	0	1	1	1	3	0.14348	31	3	10.3333	31	3	31	3
1	1	57834715	17641477	0		1	0					1437		195.3	1	1	1	1	0	1	1	8	3	2.6667	0.39362	1	1	0	0	1	0	0	1	0	0	1	2	4	0.13422	14.5	1.5	7.25	29	3	14.5	1.5
	1	57834715	17641477	0	0	1	0	0	0	0	1	1701	1702.36	80	1	1	1	1	0	1	1	6	4	1.5	0.46809	1	1	0	0	1	0	0	1	0	0	0	2	3	0.11571	12.5	1.5	8.3333	25	3	12.5	1.5
0	1	25421778	17641477	1	0	1	0	0	0	1	0	806	806.627	24.9	0	0	0	1	0	1	1	9	3	3	0.37	0	0	0	1	0	0	0	0	0	1	1	1	3	0.14348	31	3	10.3333	31	3	31	3
1	1	25421778	17641477	1	0	1	0	0	0	0	1	1260	1256.34	72.4	1	1	1	1	0	1	1	9	3	3	0.39362	1	1	0	0	1	0	0	1	0	0	1	2	4	0.13422	14.5	1.5	7.25	29	3	14.5	1.5
	1	25421778	17641477	1	1	1	0	0	0	0	1	1650	1651.37	80	1	1	1	1	0	1	1	8	5	1.6	0.39362	1	1	0	0	1	0	0	1	0	0	0	2	3	0.11571	12.5	1.5	8.3333	25	3	12.5	1.5
0	1	26817827	42224732	1	1	1	0	0	0	0	1		1064.45		1	0	0	0	0	1	1	4	2	2	0.5	0	1	0	1	1	1	0	0	0	1	1	1	0	0.061133	8	3		8	3	8	3
1	1	26817827	42224732	1	1	1	1	0	0	0	1	1497	1492.39	35.6	0	1	1	0	1	1	0	7	2	3.5	0.34043	1	1	0	0	0	0	0	0	0	0	0	1	0	0.12991	17	3		17	3	17	3
	1	26817827	42224732	1	0	1	0	0	0	0	1	1894	1898.38	80	1	1	1	0	0	1	0	5	3	1.6667	0.41489	1	1	0	0	0	0	0	0	0	0	1	1	0	0.10698	14	3		14	3	14	3
0	1	26817827	42224732	1	0	1	0	0	0	0	1		1071.46		1	0	0	0	0	1	1	4	2	2	0.5	0	1	0	1	1	1	0	0	0	1	1	1	0	0.061133	8	3		8	3	8	3
1	1	26817827	42224732	1	1	1	1	0	0	0	1	1504	1499.41	35.6	0	1	1	0	1	1	0	7	2	3.5	0.34043	1	1	0	0	0	0	0	0	0	0	0	1	0	0.12991	17	3		17	3	17	3
	1	26817827	42224732	1	0	1	0	0	0	0	1	1903	1905.38	80	1	1	1	0	0	1	0	5	3	1.6667	0.41489	1	1	0	0	0	0	0	0	0	0	1	1	0	0.10698	14	3		14	3	14	3
	1	35128854	42224732	1	1		0	0	0	0	1	2125	2129.39	80	1	1	1	1	0	1	0	5	2	2.5	0.38298	1	1	0	0	0	0	0	0	0	0	1	1	0	0.10698	14	3		14	3	14	3
1	1	35128854	42224732	1	0		1	0	0	0	1	1728	1723.42	35.6	0	1	1	0	1	1	0	6	1	6	0.32979	1	1	0	0	0	0	0	0	0	0	0	1	0	0.12991	17	3		17	3	17	3
0	1	15656826	42224732	0	1	1	1	0	0	0	1		1174.5		1	0	1	0	1	1	1	4	1	4	0.53	0	1	0	1	1	1	0	0	0	1	1	1	0	0.061133	8	3		8	3	8	3
1	1	18117135	26261155	0			0					291		224	0	1	1	1	1	1	0	8	2	4	0.28723	1	1	1	0	1	0	0	1	0	0	1	1	1	0.052375	12	5	12	12	5	12	5
	1	18117135	26261155	0	1		0	0	0	0	1	676	677.57	220	0	1	1	1	1	1	0	4	1	4	0.41489	1	1	0	0	0	0	0	0	0	0	1	3	1	0.065469	5	1.6667	15	15	5	5	1.6667
1	1	18117135	26261155	1	0		0	0	0	0	1	1577	1651.42	224	0	1	1	1	1	1	0	8	2	4	0.28723	1	1	1	0	1	0	0	1	0	0	1	1	1	0.052375	12	5	12	12	5	12	5
	1	18117135	26261155	1	1		0	0	0	0	1	1961	1962.58	220	0	1	1	1	1	1	0	4	1	4	0.41489	1	1	0	0	0	0	0	0	0	0	1	3	1	0.065469	5	1.6667	15	15	5	5	1.6667
	1	81182513	26261155	1	0		1	1	0	1	0	176	177.587	220	0	1	1	1	0	1	0	6	2	3	0.3617	1	1	0	0	0	0	0	0	0	0	1	3	1	0.065469	5	1.6667	15	15	5	5	1.6667
	1	68618664	51811685											18	0	1	1	1	0	1	1	8	3	2.6667	0.39362	1	1	0	0	1	0	0	1	0	0	0	2	1	0.041561	21	13.5	42	42	27	21	13.5
0	1	57813326	51811685	0	1	1	0	1	1	1	0	66	66.5826	25.4	1	0	0	1	0	1	0	3	2	1.5	0.43	0	1	0	1	0	0	0	0	0	1	1	1	1	0.013854	14	15	14	14	15	14	15
0	1	18733421	51811685	0	1	1	0	0	0	0	1	430	426.597	25.4	1	0	0	1	0	1	1	3	2	1.5	0.55	0	1	0	1	0	0	0	0	0	1	1	1	1	0.013854	14	15	14	14	15	14	15
0	1	43743327	51811685	1	1	1	0	0	0	0	1	689	684.614	25.4	1	0	0	1	0	1	1	5	2	2.5	0.47	0	1	0	1	0	0	0	0	0	1	1	1	1	0.013854	14	15	14	14	15	14	15
0	1	64836887	51811685	1	0	1	0	0	0	1	0	363	363.43	25.4												0	1	0	1	0	0	0	0	0	1	1	1	1	0.013854	14	15	14	14	15	14	15
0	1	43243881	51811685	1	1	1	0	0	0	0	1	637	633.63	25.4	1	0	0	1	0	1	1	3	2	1.5	0.56	0	1	0	1	0	0	0	0	0	1	1	1	1	0.013854	14	15	14	14	15	14	15
0	1	66215734	41316315	0	0	1	1	0	0	0	1	1244	1244.66	25.4	1	1	1	1	0	1	1	9	3	3	0.43	1	1	0	1	1	0	0	1	0	1	0	1	4	0.2002	25	4	6.25	25	4	25	4
1	1	66215734	41316315	0	1	1	1	0	0	0	1	1646	1657.48	37.1	0	1	1	1	0	1	1	6	3	2	0.46809	1	1	0	0	1	0	0	1	0	0	0	2	4	0.12813	8	2	4	16	4	8	2
0	1	61383572	14722554	0	1	1	1	1	0	1	0	216	215.494	3.5	0	0	0	1	1	1	1	10	3	3.3333	0.41	0	1	0	1	0	0	0	0	0	0	1	0	1	0.036162			9	9	1
0	1	24727836	21238478	0	0	1	1	0	0	1	0	533	517.62	3	0	0	0	1	0	1	1	6	2	3	0.47	0	1	0	1	0	0	0	0	0	1	0	1	1	0.047627	13	1	13	13	1	13	1
1	1	24727836	21238478	0	0	1	1	0	0	0	1	915	919.554	58.5	0	1	1	1	0	1	1	6	2	3	0.40426	1	1	0	0	1	0	1	0	0	0	0	1	1	0.043963	12	2	12	12	2	12	2
	1	24727836	21238478	0	1	1	0	0	0	0	1	1317	1319.43	80	0	1	1	1	0	1	1	8	3	2.6667	0.39362	1	1	0	0	1	0	1	1	0	0	0	1	1	0.043963	12	2	12	12	2	12	2
0	1	13458788	21238478	0	1	1	1	0	0	0	1	1667	1667.63	3.5	0	0	0	1	1	1	1	7	2	3.5	0.42	0	1	0	1	0	0	0	0	0	1	0	1	1	0.047627	13	1	13	13	1	13	1
1	1	13458788	21238478	0	0	1	1	0	0	0	1	2095	2066.51	87.9	0	1	1	1	0	1	1	6	3	2	0.46809	1	1	0	0	1	0	1	0	0	0	0	1	1	0.043963	12	2	12	12	2	12	2
	1	13458788	21238478	0		1	1					2549		240	0	1	1	1	0	1	1	4	3	1.3333	0.47872	1	1	0	0	1	0	1	1	0	0	0	1	1	0.043963	12	2	12	12	2	12	2
0	1	82437448	83368532	1	1	1	1	0	0	1	0	775	775.479	3	0	0	0	1	1	1	1	12	2	6	0.38	0	1	0	1	0	0	0	0	0	0	0	1	1	0.0833	14	3	14	14	3	14	3
1	1	82437448	83368532	1	1	1	1	0	0	0	1	1300	1217.31	190.2	1	0	1	1	1	1	1	10	3	3.3333	0.39362	1	1	0	0	1	1	0	1	0	0	0	1	1	0.0833	14	2	14	14	2	14	2
	1	82437448	83368532	1	1	1	1	0	0	0	1	1634	1665.41	213.1	1	1	0	1	0	1	1	6	2	3	0.46809	1	1	0	0	1	0	0	1	1	0	0	1	1	0.0714	12	2	12	12	2	12	2
	1	82437448	83368532	1	0		1	0	0	0	1	1242	1140.41	0	1	1	0	1	0	1	1	6	2	3	0.46809	1	1	0	0	1	0	0	1	1	0	0	1	1	0.0714	12	2	12	12	2	12	2
0	1	41721553	53416683	1	0	1	1	0	0	1	0	718	718.532	3	0	0	0	1	0	1	1	5	4	1.25	0.52	0	1	0	0	0	0	0	0	0	1	1	1	1	0.092118	17	3	17	17	3	17	3
1	1	41721553	53416683	1		1	1					1258		73.9	1	1	1	1	0	1	1	5	4	1.25	0.52	1	1	0	0	1	0	0	1	0	0	0	1	1	0.081281	15	3	15	15	3	15	3
	1	41721553	53416683	1		1	1					1559		78.8	1	1	1	1	1	1	1	9	2	4.5	0.3617	1	1	0	0	0	0	0	0	0	0	1	1	1	0.065025	12	2	12	12	2	12	2
0	1	41721553	53416683	0	0	1	1	0	0	0	0	1113	1112.54	3	0	0	0	1	0	1	1	5	4	1.25	0.52	0	1	0	0	0	0	0	0	0	1	1	1	1	0.092118	17	3	17	17	3	17	3
0	1	65346234	53416683	0	1	1	1	0	0	1	0	998	997.544	3	0	0	0	1	0	1	1	3	2	1.5	0.63	0	1	0	0	0	0	0	0	0	1	1	1	1	0.092118	17	3	17	17	3	17	3
1	1	65346234	53416683	0	1	1	0	0	0	0	1	1460	1460.49	89.9	1	1	1	1	0	1	1	3	2	1.5	0.60638	1	1	0	0	1	0	0	1	0	0	0	1	1	0.081281	15	3	15	15	3	15	3
	1	65346234	53416683	0		1	0					1973		20	1	1	1	1	0	1	1	3	2	1.5	0.60638	1	1	0	0	0	0	0	0	0	0	1	1	1	0.065025	12	2	12	12	2	12	2
0	1	62837175	53416683	0	0	1	1	1	0	1	0	567	567.549	3	0	0	0	1	0	1	1	4	2	2	0.55	0	1	0	0	0	0	0	0	0	1	1	1	1	0.092118	17	3	17	17	3	17	3
1	1	26647887	83786263	1	1		1	1	1	1	0	125	126.376	120.9	1	1	1	1	0	1	0	5	3	1.6667	0.37234	1	1	0	0	1	1	0	1	0	0	0	1	2	0.054262	12	2	6	12	2	12	2
	1	26647887	83786263	1			1					632		59.1	0	1	1	1	0	1	0	5	3	1.6667	0.37234	1	1	0	0	1	0	0	1	0	0	0	1	1	0.036175	8	3	8	8	3	8	3
0	1	41453534	83786263	0	0	1	0	0	0	1	0	974	973.516	3	0	0	0	1	0	1	0	6	2	3	0.37	0	1	0	0	1	0	0	1	0	0	0	1	2	0.040697	9	2	4.5	9	2	9	2
1	1	47447156	56885343	0	1		0	0	0	0	1	693	696.564	227	0	1	1	1	0	1	0	8	5	1.6	0.31915	1	1	0	0	1	0	0	1	0	0	0	1	1	0.03175	8	1	8	8	1	8	1
0	1	77386225	13656132	0	1	1	1	1	0	1	0		922.472		1	0	1	1	0	1	1	18	8	2.25	0.58	1	1	0	1	1	0	0	1	0	1	0	1	1	0.072193	18	2	18	18	2	18	2
1	1	32656184	13656132	1	0		1	0	0	0	1	906	937.846	195.3	1	1	1	1	0	1	1	4	3	1.3333	0.71277	0	1	0	0	1	1	0	1	0	0	0	1	1	0.052139	13	2	13	13	2	13	2
	1	32656184	13656132	1	0		1	0	0	0	1	1385	1323.36	0	1	1	1	1	0	1	1	4	3	1.3333	0.71277	1	1	0	0	1	0	0	1	0	1	1	1	1	0.040107	10	2	10	10	2	10	2
1	1	14155648	42684673	1	0		0	1	0	1	0	110	110.534	224	0	1	1	1	1	0	0	9	1	9	0.053191	1	1	0	0	0	0	0	0	0	0	0	1	2	0.092807	19	5	9.5	19	5	19	5
	1	14155648	42684673	1	0		0	0	0	0	1	501	507.474	213.1	0	1	0	1	1	0	0	9	1	9	0.19149	1	1	0	0	1	0	0	1	0	0	0	1	2	0.10258	21	5	10.5	21	5	21	5
1	1	73327438	61268738	1	1		0	1	0	1	0	217	217.462	224	1	1	1	1	0	1	0	5	2	2.5	0.2234	1	1	0	1	0	0	0	0	0	1	0	2	2	0.042567	8.5	2	8.5	17	4	8.5	2
	1	73327438	61268738	1	1		0	1	0	1	0	655	644.364	96.1	0	1	1	1	1	1	0	6	1	6	0.29787	1	1	0	0	0	0	0	0	0	0	0	3	2	0.055087	7.3333	1.3333	11	22	4	7.3333	1.3333
1	1	16677874	11821782	1	1		1	1	0	0	1	513	514.365	114.7	0	1	1	1	0	1	1	4	3	1.3333	0.52128	1	1	0	1	1	0	0	1	0	0	0	2	1	0.099845	11	3	22	22	6	11	3
0	1	61467352	11821782	1	1	1	1	1	0	1	0	307	307.688	3	0	0	0	1	0	1	1	5	3	1.6667	0.52	0	1	0	1	1	0	0	1	0	1	1	1	1	0.14069	31	7	31	31	7	31	7
1	1	61467352	11821782	1	1	1	1	0	0	0	1	809	809.383	118.8	0	1	1	1	0	1	1	5	2	2.5	0.48936	1	1	0	1	1	0	0	1	0	0	0	2	1	0.099845	11	3	22	22	6	11	3
	1	61467352	11821782	1	1	1	0	0	0	0	1	1288	1199.34	18	0	1	1	1	0	1	1	8	3	2.6667	0.39362	1	1	0	0	1	0	0	1	0	0	0	2	1	0.13161	14.5	3	29	29	6	14.5	3
	1	61467352	11821782	0	1		0	1	0	1	0	172	90.3863	18	0	1	1	1	0	1	1	8	3	2.6667	0.39362	1	1	0	0	1	0	0	1	0	0	0	2	1	0.13161	14.5	3	29	29	6	14.5	3
0	1	27836882	11821782	1	1	1	0	1	0	1	0	448	448.698	3	0	0	0	1	0	1	0	5	2	2.5	0.39	0	1	0	1	1	0	0	1	0	1	1	1	1	0.14069	31	7	31	31	7	31	7
0	1	86217365	11821782	0	1	1	0	1	1	1	0	128	123.706	3	0	0	0	1	0	1	0	4	2	2	0.45	0	1	0	1	1	0	0	1	0	1	1	1	1	0.14069	31	7	31	31	7	31	7
1	1	86217365	11821782	0		1	0					680		25.1	0	1	1	1	0	1	0	4	2	2	0.45	1	1	0	1	1	0	0	1	0	0	0	2	1	0.099845	11	3	22	22	6	11	3
	1	86217365	11821782	0	1	1	0	0	0	0	1	1124	1015.32	0	0	1	1	1	0	1	0	5	2	2.5	0.38298	1	1	0	0	1	0	0	1	0	0	0	2	1	0.13161	14.5	3	29	29	6	14.5	3
	1	86217365	11821782	0	1		0	1	0	1	0	93	97.3395	199.2	0	1	1	1	0	1	0	5	2	2.5	0.38298	1	1	0	0	1	0	0	1	0	0	0	2	1	0.13161	14.5	3	29	29	6	14.5	3
0	1	56455353	37677628	0	1	1	0	0	0	1	0	762	762.643	3	1	0	0	1	0	1	0	8	6	1.3333	0.33	1	0	0	0	1	0	0	1	0	1	0	1	2	0.22875	14	2	7	14	2	14	2
	1	72321812	37677628	0	1		0	1	0	1	0	196	274.568	213.1	0	1	1	0	0	1	0	6	2	3	0.21277	1	1	0	0	0	0	0	0	0	0	0	1	1	0.14705	9	3	9	9	3	9	3
	1	42738726	37677628	1	1		0	0	0	0	1	1023	1101.57	213.1	0	1	1	1	0	1	0	3	1	3	0.5	1	1	0	0	0	0	0	0	0	0	0	1	1	0.14705	9	3	9	9	3	9	3
0	1	26777654	25545882	1	1	1	1	0	0	1	0	897	897.455	3	0	0	0	1	0	1	1	9	3	3	0.48	0	1	1	1	1	1	0	0	0	1	0	1	1	0.16384	27	5	27	27	5	27	5
1	1	26777654	25545882	1	1	1	1	0	0	0	1	1352	1352.38	118.9	1	1	1	1	0	1	1	9	3	3	0.39362	1	1	1	0	1	0	0	1	0	0	0	1	1	0.16384	27	5	27	27	5	27	5
	1	26777654	25545882	1		1	1								0	1	1	1	0	1	1	9	3	3	0.39362	1	1	0	0	1	0	0	1	0	0	0	1	1	0.18204	30	5	30	30	5	30	5
0	1	68643117	25545882	1	1		0	0	0	0	1	1371	1371.47	3	0	0	0	1	0	1	0	3	2	1.5	0.56	0	1	1	1	1	1	0	0	0	1	0	1	1	0.16384	27	5	27	27	5	27	5
1	1	68643117	25545882	1	0		1	0	0	0	1	1828	1826.42	89.9	1	1	1	1	0	1	0	4	2	2	0.44681	1	1	1	0	1	0	0	1	0	0	0	1	1	0.16384	27	5	27	27	5	27	5
	1	68643117	25545882	1	1		0	0	0	0	1	2208	2206.37	197.9	0	1	1	1	0	1	0	4	2	2	0.44681	1	1	0	0	1	0	0	1	0	0	0	1	1	0.18204	30	5	30	30	5	30	5
	1	68643117	25545882	0	1		0	1	1	1	0	211	209.373	197.9	0	1	1	1	0	1	0	4	2	2	0.44681	1	1	0	0	1	0	0	1	0	0	0	1	1	0.18204	30	5	30	30	5	30	5
0	1	53585538	25545882	0	1	1	0	0	0	1	0	592	592.444	3	0	0	0	1	0	1	0	5	3	1.6667	0.45	0	1	1	1	1	1	0	0	0	1	0	1	1	0.16384	27	5	27	27	5	27	5
1	1	53585538	25545882	0	1	1	0	0	0	0	1	1047	1047.4	118.9	1	1	1	1	0	1	0	6	2	3	0.3617	1	1	1	0	1	0	0	1	0	0	0	1	1	0.16384	27	5	27	27	5	27	5
	1	53585538	25545882	0		1	0					1562		20	0	1	1	1	0	1	0	6	2	3	0.3617	1	1	0	0	1	0	0	1	0	0	0	1	1	0.18204	30	5	30	30	5	30	5
1	1	51387274	73583638	1	1		1	1	0	1	0	348	417.841	227	1	1	1	1	0	1	1	5	4	1.25	0.45745	0	1	0	0	1	0	0	1	0	0	0	1	2	0.072044	11	3	5.5	11	3	11	3
	1	51387274	73583638	1	1		1	0	0	1	0	848	740.619	20	0	1	1	1	0	1	1	8	4	2	0.39362	1	1	0	0	1	0	0	1	0	0	0	1	1	0.10479	16	3	16	16	3	16	3
0	1	32355376	73583638	0	1	1	1	0	0	1	0	306	306.499	3	0	0	0	1	0	1	1	7	3	2.3333	0.4	0	1	0	0	1	0	0	1	0	0	0	1	1	0.10479	16	4	16	16	4	16	4
0	1	53732872	73583638	1	1	1	0	0	0	1	0	1302	1300.47	3	0	0	0	1	0	1	1	4	2	2	0.5	0	1	0	0	1	0	0	1	0	0	0	1	1	0.10479	16	4	16	16	4	16	4
0	1	53732872	73583638	1	1	1	0	0	0	1	0	1300	1300.48	3	0	0	0	1	0	1	1	4	2	2	0.5	0	1	0	0	1	0	0	1	0	0	0	1	1	0.10479	16	4	16	16	4	16	4
0	1	15531555	73583638	0	1	1	0	1	0	1	0	825	822.491	3	0	0	0	1	0	1	1	3	2	1.5	0.58	0	1	0	0	1	0	0	1	0	0	0	1	1	0.10479	16	4	16	16	4	16	4
	1	38844171	45877134											18	0	1	1	1	0	1	1	7	3	2.3333	0.41489	1	1	0	0	1	0	1	1	0	0	0	1	1	0.23187	7	1	7	7	1	7	1
0	1	73316757	36553222	1	1	1	1	0	0	0	1	882	999.449	3	0	0	0	1	0	1	1	5	3	1.6667	0.49	1	1	0	1	0	0	0	0	0	1	1	1	1	0.057891	16	6	16	16	6	16	6
1	1	73316757	36553222	1	1	1	0	0	0	0	1	1352	1349.41	227	1	1	1	1	0	1	1	7	3	2.3333	0.41489	1	1	0	0	1	0	0	1	0	0	0	1	1	0.075983	21	7	21	21	7	21	7
	1	73316757	36553222	1	0	1	0	0	0	0	1	1723	1725.4	215.9	0	1	1	1	0	1	1	7	3	2.3333	0.41489	1	1	0	0	0	0	0	0	0	0	0	2	1	0.06151	8.5	3	17	17	6	8.5	3
1	1	73316757	36553222	1	0		0	0	0	0	1	524	525.402	224	1	1	1	1	0	1	1	7	3	2.3333	0.41489	1	1	0	0	1	0	0	1	0	0	0	1	1	0.075983	21	7	21	21	7	21	7
	1	73316757	36553222	1	1		0	0	0	0	1	899	905.489	215.9	0	1	1	1	0	1	1	7	3	2.3333	0.41489	1	1	0	0	0	0	0	0	0	0	0	2	1	0.06151	8.5	3	17	17	6	8.5	3
1	1	73316757	36553222	1	0		0	1	0	1	0	313	303.395	206.9	1	1	1	1	0	1	1	7	3	2.3333	0.41489	1	1	0	0	1	0	0	1	0	0	0	1	1	0.075983	21	7	21	21	7	21	7
	1	73316757	36553222	1			0					679		215.9	0	1	1	1	0	1	1	7	3	2.3333	0.41489	1	1	0	0	0	0	0	0	0	0	0	2	1	0.06151	8.5	3	17	17	6	8.5	3
0	1	23234183	53316458	1	1	1	0	1	0	1	0	520	516.645	3	0	0	0	1	1	0	1	10	1	10	0.24	0	1	0	0	0	0	0	0	0	0	0	1	1	0.1398	16	3	16	16	3	16	3
1	1	23234183	53316458	1		1	0					990		224	0	1	1	1	1	1	1	8	1	8	0.30851	1	1	0	0	0	0	0	0	0	0	0	1	1	0.09611	11	3	11	11	3	11	3
	1	23234183	53316458	1	1	1	0	0	0	0	1	1382	1381.5	213.1	0	1	1	1	1	1	1	9	2	4.5	0.37234	1	1	0	0	1	0	0	1	0	0	0	1	1	0.11358	13	3	13	13	3	13	3
0	1	48123217	68587225											29.6	0	0	0	1	0	1	0	6	4	1.5	0.41	1	1	0	1	1	0	0	1	0	1	0	1	1	0.07553	9	3	9	9	3	9	3
0	1	63143221	56238828	0	1	1	1	1	0	1	0	400	401.399	3.5	0	0	0	1	0	1	1	7	4	1.75	0.39	0	1	0	0	0	0	0	0	0	0	0	1	1	0.067924	22	3	22	22	3	22	3
1	1	63143221	56238828	0	1	1	1	0	0	0	1	867	872.32	120.9	1	1	1	1	0	0	1	8	4	2	0.29787	1	1	0	0	0	0	0	0	0	0	0	1	2	0.064836	21	3	10.5	21	3	21	3
0	1	22617748	56238828	0	1	1	0	1	0	1	0	274	275.374	3.5	0	0	0	1	0	1	1	9	3	3	0.33	0	1	0	0	0	0	0	0	0	0	0	1	1	0.067924	22	3	22	22	3	22	3
1	1	22617748	56238828	0	1	1	1	0	0	0	1	741	746.345	120.9	1	1	1	1	0	1	1	9	3	3	0.39362	1	1	0	0	0	0	0	0	0	0	0	1	2	0.064836	21	3	10.5	21	3	21	3
	1	22617748	56238828	0	1	1	0	0	0	0	1		1220.51		0	1	1	1	0	1	1	7	3	2.3333	0.41489	1	1	0	0	1	0	0	1	0	0	0	2	11	0.037049	6	1	1.0909	12	2	6	1
0	1	16216884	56238828	0	1	1	0	0	0	0	0	586	587.366	3.5	0	0	0	1	0	0	0	3	1	3	0.32	0	1	0	0	0	0	0	0	0	0	0	1	1	0.067924	22	3	22	22	3	22	3
1	1	16216884	56238828	0	1	1	0	0	0	0	1	1053	1058.35	120.9	1	1	1	1	1	1	1	8	1	8	0.26596	1	1	0	0	0	0	0	0	0	0	0	1	2	0.064836	21	3	10.5	21	3	21	3
0	1	25753426	28851522	1	0	1	1	0	0	0	1		1516.51		0	0	0	1	0	1	1	5	2	2.5	0.64	1	0	0	1	1	0	0	1	0	1	1	1	3	0.088928	12	3	4	12	3	12	3
	1	25753426	28851522											59.9	1	1	1	1	1	1	1	8	2	4	0.39362	1	1	0	0	1	0	0	1	0	0	0	1	3	0.088928	12	3	4	12	3	12	3
0	1	45557442	28851522	1	1	1	0	0	0	0	1				0	0	0	1	0	1	1	5	2	2.5	0.46	1	0	0	1	1	0	0	1	0	1	1	1	3	0.088928	12	3	4	12	3	12	3
0	1	38354752	84317766	1	1	1	1	1	1	1	0		72.4192		0	0	0	1	0	1	1	8	3	2.6667	0.43	1	1	0	1	0	0	0	0	0	0	0	1	1	0.16088	21	5	21	21	5	21	5
1	1	38354752	84317766	1	1	1	1	0	0	0	1	486	487.619	97.8	0	1	1	1	0	1	1	8	3	2.6667	0.37234	1	1	0	0	1	0	0	1	0	0	0	1	1	0.18386	24	5	24	24	5	24	5
0	1	38354752	84317766	1	1	1	1	1	0	1	0	409	408.422	3	0	0	0	1	0	1	1	8	3	2.6667	0.43	1	1	0	1	0	0	0	0	0	0	0	1	1	0.16088	21	5	21	21	5	21	5
1	1	38354752	84317766	1	1		1	1	1	1	0	135	138.333	97.8	0	1	1	1	0	1	1	8	3	2.6667	0.37234	1	1	0	0	1	0	0	1	0	0	0	1	1	0.18386	24	5	24	24	5	24	5
	1	38354752	84317766	1	1		0	0	0	1	0		504.538		0	1	1	1	0	1	1	4	3	1.3333	0.55319	1	1	0	0	0	0	0	0	0	0	0	1	1	0.1379	18	4	18	18	4	18	4
0	1	24628633	84317766	0	0	1	0	0	0	1	0	785	780.524	3	0	0	0	1	0	1	1	8	3	2.6667	0.43	1	1	0	1	0	0	0	0	0	0	0	1	1	0.16088	21	5	21	21	5	21	5
1	1	24628633	84317766	0	0	1	0	0	0	0	1	1199	1329.55	97.8	0	1	1	1	1	1	1	9	2	4.5	0.28723	1	1	0	0	1	0	0	1	0	0	0	1	1	0.18386	24	5	24	24	5	24	5
	1	24628633	84317766	0	0	1	0	0	0	0	1	1719	1590.34	11.6	0	1	1	1	0	1	1	7	3	2.3333	0.41489	1	1	0	0	0	0	0	0	0	0	0	1	1	0.1379	18	4	18	18	4	18	4
0	1	65761476	28838334	1	1	1	0	0	0	1	0	186	184.564	3	0	0	0	0	0	1	0	5	2	2.5	0.28	0	0	0	1	1	0	1	1	0	0	1	1	0	0.022249	6	3		6	3	6	3
1	1	65761476	28838334	1	0	1	0	0	0	1	0	598	597.544	97.8	1	1	1	0	0	1	0	6	2	3	0.21277	1	1	0	0	1	1	1	1	0	0	1	1	0	0.063038	17	4		17	4	17	4
0	1	65761476	28838334	0	1	1	0	0	0	0	0	955	955.57	3	0	0	0	0	0	1	0	5	2	2.5	0.28	0	0	0	1	1	0	1	1	0	0	1	1	0	0.022249	6	3		6	3	6	3
1	1	65761476	28838334	0	0	1	0	0	0	0	1	1369	1368.55	97.8	1	1	1	0	0	1	0	6	2	3	0.21277	1	1	0	0	1	1	1	1	0	0	1	1	0	0.063038	17	4		17	4	17	4
1	1	26715654	28838334	1	1		0	1	0	1	0	286	287.373	97.8	1	1	1	0	1	1	0	4	1	4	0.25532	1	1	0	0	1	1	1	1	0	0	1	1	0	0.063038	17	4		17	4	17	4
1	1	26715654	28838334	1	1		0	0	0	0	0	1776	1770.38	83.8	1	1	1	0	1	1	0	4	1	4	0.25532	1	1	0	0	1	1	1	1	0	0	1	1	0	0.063038	17	4		17	4	17	4
0	1	14418154	27688558	1	1	1	1	0	0	0	1	896	895.62	3.5	0	0	0	1	1	1	1	8	2	4	0.4	1	1	0	1	0	0	0	0	0	0	1	1	1	0.052685	15	4	15	15	4	15	4
1	1	14418154	27688558	0	0		0	0	0	1	0	379	379.411	78.9	1	1	1	1	1	1	1	10	2	5	0.31915	1	1	0	0	1	1	0	1	0	0	1	1	1	0.056197	16	3	16	16	3	16	3
	1	14418154	27688558	0	1		1	0	0	0	0	715	717.342	16.3	0	1	1	1	0	1	1	7	4	1.75	0.41489	1	1	0	0	1	0	0	1	0	0	0	1	1	0.04566	13	2	13	13	2	13	2
	1	68552421	44772672	0	0		0	0	0	0	1	1781	1780.39	60.2	1	1	1	1	0	1	0	3	3	1	0.53191	1	1	0	0	0	0	0	0	0	0	0	1	1	0.049794	4	2	4	4	2	4	2
1	1	68552421	44772672	0	1		0	0	0	0	1	1441	1442.58	75.9	0	1	1	1	0	1	1	4	2	2	0.45745	1	0	0	0	0	0	0	0	0	0	0	1	1	0.049794	4	1	4	4	1	4	1
0	1	75657472	11674181	1	0	1	1	1	0	1	0	161	161.566	3	0	0	0	1	0	1	1	5	2	2.5	0.47	1	0	0	1	1	0	1	1	0	1	0	1	1	0.067621	10	1	10	10	1	10	1
1	1	75657472	11674181	1	0	1	1	0	0	1	0	587	588.55	75.9	0	1	1	1	0	1	1	9	5	1.8	0.39362	1	1	0	0	1	0	0	1	0	0	0	1	1	0.060859	9	1	9	9	1	9	1
	1	75657472	11674181	1	0	1	1	0	0	0	1		930.479		0	1	1	1	0	1	1	7	4	1.75	0.41489	1	1	0	0	1	0	0	1	0	0	0	1	1	0.047334	7	1	7	7	1	7	1
0	1	75657472	11674181	1	0	1	1	0	0	1	0	678	678.568	3	0	0	0	1	0	1	1	5	2	2.5	0.47	1	0	0	1	1	0	1	1	0	1	0	1	1	0.067621	10	1	10	10	1	10	1
1	1	75657472	11674181	1		1	1					1210		96	0	1	1	1	0	1	1	9	5	1.8	0.39362	1	1	0	0	1	0	0	1	0	0	0	1	1	0.060859	9	1	9	9	1	9	1
	1	75657472	11674181	1	0	1	1	0	0	0	1		1447.48		0	1	1	1	0	1	1	7	4	1.75	0.41489	1	1	0	0	1	0	0	1	0	0	0	1	1	0.047334	7	1	7	7	1	7	1
0	1	46558574	45875471	1	1	1	1	0	0	1	0		239.483		1	0	0	1	0	1	0	8	4	2	0.36	1	1	0	1	1	0	0	1	0	1	1	1	1	0.052217	18	3	18	18	3	18	3
1	1	46558574	45875471	1	1	1	0	0	0	0	1	707	702.396	227	1	1	1	1	0	1	0	12	5	2.4	0.28723	1	1	0	0	1	0	0	1	0	1	0	1	1	0.055118	19	2	19	19	2	19	2
1	1	46558574	45875471	1										224	1	1	1	1	0	1	0	12	5	2.4	0.28723	1	1	0	0	1	0	0	1	0	1	0	1	1	0.055118	19	2	19	19	2	19	2
0	1	45126637	45875471	1	0	1	1	1	0	1	0	449	449.49	3	1	0	0	1	0	1	0	7	4	1.75	0.38	1	1	0	1	1	0	0	1	0	1	1	1	1	0.052217	18	3	18	18	3	18	3
1	1	45126637	45875471	1	1	1	1	0	0	0	1	911	912.374	224	1	1	1	1	0	1	0	7	3	2.3333	0.30851	1	1	0	0	1	0	0	1	0	1	0	1	1	0.055118	19	2	19	19	2	19	2
	1	67164445	44581335	0	1		1	1	1	1	0	236	201.315	20	1	1	1	0				2				1	1	0	0	1	0	0	1	0	0	0	1	1	0.017558	7	3	7	7	3	7	3
0	1	35372454	38617242	1	0	1	0	0	0	1	0	635	634.428	3	0	0	0	1	1	1	1	15	3	5	0.4	0	1	1	1	1	0	0	1	0	1	1	1	1	0.11848	15	2	15	15	2	15	2
1	1	35372454	38617242	1	1	1	0	0	0	0	1		1061.52		0	1	1	1	0	1	1	8	3	2.6667	0.3617	1	1	0	0	1	0	0	1	0	0	0	1	1	0.063189	8	1	8	8	1	8	1
1	1	35372454	38617242	0	1		0	1	0	1	0		200.526		0	1	1	1	0	1	1	8	3	2.6667	0.3617	1	1	0	0	1	0	0	1	0	0	0	1	1	0.063189	8	1	8	8	1	8	1
0	1	72774375	38365111	0	0	1	0	1	1	1	0		58.5579		1	1	0	1	0	1	1	3	2	1.5	0.56	1	1	0	1	1	0	0	1	0	1	1	1	1	0.041103	20	3	20	20	3	20	3
1	1	72774375	38365111	0	1	1	0	0	0	1	0	517	513.512	223	1	1	1	1	0	1	1	3	2	1.5	0.5	1	1	0	0	1	1	0	1	0	1	1	1	2	0.018497	9	4	4.5	9	4	9	4
	1	72774375	38365111	0	1	1	0	0	0	0	1	877	894.595	83.1	0	1	1	1	0	1	1	3	2	1.5	0.57447	1	1	0	0	1	0	0	1	0	0	1	2	1	0.020552	5	2.5	10	10	5	5	2.5
1	1	33814612	52315524	0	1		0	0	0	0	1	1128	1129.55	223	0	1	1	1	0	1	1	5	2	2.5	0.45745	1	1	0	0	1	0	0	1	0	0	0	1	2	0.093332	9	3	4.5	9	3	9	3
0	1	55322477	85674257	1	0	1	1	0	0	1	0	286	285.541	3.5	0	0	0	1	1	1	1	13	2	6.5	0.32	0	1	0	1	1	0	0	1	0	1	0	1	2	0.060976	18	4	9	18	4	18	4
1	1	55322477	85674257	1	1	1	1	0	0	0	1	729	729.389	113.8	1	1	1	1	1	1	0	10	2	5	0.20213	1	1	1	0	1	0	1	1	0	0	0	1	2	0.064364	19	3	9.5	19	3	19	3
	1	55322477	85674257	1	0	1	1	0	0	0	1	1098	1117.52	83.1	0	1	1	1	1	1	0	12	2	6	0.12766	1	1	0	0	1	0	1	0	0	0	0	1	2	0.054201	16	2	8	16	2	16	2
0	1	55322477	85674257	0	0	1	1	0	0	0	0	1057	1056.55	3.5	0	0	0	1	1	1	1	13	2	6.5	0.32	0	1	0	1	1	0	0	1	0	1	0	1	2	0.060976	18	4	9	18	4	18	4
1	1	55322477	85674257	0	0	1	1	0	0	0	1	1511	1500.39	223	1	1	1	1	1	1	0	10	2	5	0.20213	1	1	1	0	1	0	1	1	0	0	0	1	2	0.064364	19	3	9.5	19	3	19	3
	1	55322477	85674257	0	0	1	1	0	0	0	1	1869	1984.42	83.1	0	1	1	1	1	1	0	12	2	6	0.12766	1	1	0	0	1	0	1	0	0	0	0	1	2	0.054201	16	2	8	16	2	16	2
0	1	55322477	85674257	0	0	1	1	0	0	0	0	1214	1213.55	3.5	0	0	0	1	1	1	1	13	2	6.5	0.32	0	1	0	1	1	0	0	1	0	1	0	1	2	0.060976	18	4	9	18	4	18	4
1	1	55322477	85674257	0	0	1	1	0	0	0	1	1670	1657.4	224	1	1	1	1	1	1	0	10	2	5	0.20213	1	1	1	0	1	0	1	1	0	0	0	1	2	0.064364	19	3	9.5	19	3	19	3
	1	55322477	85674257	0	0	1	1	0	0	0	1	2175	2045.53	20	0	1	1	1	1	1	0	12	2	6	0.12766	1	1	0	0	1	0	1	0	0	0	0	1	2	0.054201	16	2	8	16	2	16	2
0	1	55322477	85674257	0	1	1	1	0	0	0	0	1653	1653.54	3	0	0	0	1	1	1	1	13	2	6.5	0.32	0	1	0	1	1	0	0	1	0	1	0	1	2	0.060976	18	4	9	18	4	18	4
1	1	55322477	85674257	0	0	1	1	0	0	0	1	2103	2097.4	89.1	1	1	1	1	1	1	0	10	2	5	0.20213	1	1	1	0	1	0	1	1	0	0	0	1	2	0.064364	19	3	9.5	19	3	19	3
	1	55322477	85674257	0	0	1	0	0	0	0	1	2466	2485.53	83.1	0	1	1	1	1	1	0	12	2	6	0.12766	1	1	0	0	1	0	1	0	0	0	0	1	2	0.054201	16	2	8	16	2	16	2
0	1	55248737	85674257	0	0	1	0	0	0	1	0	493	493.577	3	0	0	0	1	1	1	1	7	2	3.5	0.42	0	1	0	1	1	0	0	1	0	1	0	1	2	0.060976	18	4	9	18	4	18	4
1	1	55248737	85674257	0	1	1	1	0	0	1	0	942	940.46	89.9	1	1	1	1	1	1	0	7	2	3.5	0.34043	1	1	1	0	1	0	1	1	0	0	0	1	2	0.064364	19	3	9.5	19	3	19	3
	1	55248737	85674257	1	0		0	1	1	1	0	375	341.426	20	0	1	1	1	0	1	0	4	2	2	0.37234	1	1	0	0	1	0	1	0	0	0	0	1	2	0.054201	16	2	8	16	2	16	2
	1	55248737	85674257	0	0		0	0	0	0	1	1191	1157.43	20	0	1	1	1	0	1	0	4	2	2	0.37234	1	1	0	0	1	0	1	0	0	0	0	1	2	0.054201	16	2	8	16	2	16	2
0	1	66212257	23141562	1	1	1	0	1	1	1	0	114	113.558	3.5	0	0	0	0	0	1	1	7	3	2.3333	0.4	0	1	0	0	0	0	0	0	0	0	0	1	1	0.04962	13	3	13	13	3	13	3
0	1	66212257	23141562	1	1	1	0	0	0	0	1	1210	1210.56	3	0	0	0	0	0	1	1	7	3	2.3333	0.4	0	1	0	0	0	0	0	0	0	0	0	1	1	0.04962	13	3	13	13	3	13	3
0	1	27226664	62741848	1	1		1	0	0	1	0	441	441.367	12.1	0	0	0	1	0	1	1	3	2	1.5	0.63	1	1	1	1	1	0	0	1	0	1	0	1	1	0.043084	10	2	10	10	2	10	2
1	1	27226664	62741848	1	1		1	0	0	0	1	929	941.372	195.3	1	1	1	1	0	1	1	3	1	3	0.60638	1	1	0	0	1	0	0	1	0	0	1	1	1	0.043084	10	2	10	10	2	10	2
	1	27226664	62741848	1	1		1	0	0	0	1	1298	1298.4	198.2	1	1	1	1	0	1	1	3	2	1.5	0.60638	1	1	0	0	0	0	0	0	0	0	1	1	1	0.043084	10	2	10	10	2	10	2
	1	78564643	62741848	0	1		1	0	0	0	1	1394	1313.41	20	1	1	1	1	0	1	1	7	3	2.3333	0.41489	1	1	0	0	0	0	0	0	0	0	1	1	1	0.043084	10	2	10	10	2	10	2
1	1	78564643	62741848	0	1		0	0	0	0	1	944	956.378	195.3	1	1	1	1	0	1	1	7	4	1.75	0.34043	1	1	0	0	1	0	0	1	0	0	1	1	1	0.043084	10	2	10	10	2	10	2
0	1	68874331	82544473	1	1	1	1	1	1	1	0	128	127.592	8.6	1	1	1	1	0	1	1	3	2	1.5	0.56	1	1	0	0	0	0	0	0	0	1	1	1	1	0.043717	15	7	15	15	7	15	7
1	1	68874331	82544473	1	1	1	1	0	0	1	0	513	513.316	103.9	1	1	1	1	0	1	1	3	2	1.5	0.48936	1	1	1	0	1	1	0	1	0	0	1	2	1	0.064118	11	2	22	22	4	11	2
	1	68874331	82544473	1	1	1	1	0	0	0	1	903	909.311	68.1	0	1	1	1	0	1	1	3	2	1.5	0.57447	1	1	0	0	1	0	0	1	0	0	0	2	1	0.037888	6.5	2	13	13	4	6.5	2
1	1	64271863	82544473	0	1		1	1	0	1	0	438	438.353	103.9	1	1	1	1	0	1	1	4	2	2	0.52128	1	1	1	0	1	1	0	1	0	0	1	2	1	0.064118	11	2	22	22	4	11	2
	1	64271863	82544473	0	1		0	0	0	0	1	801	806.593	16.3	0	1	1	1	0	1	1	4	2	2	0.52128	1	1	0	0	1	0	0	1	0	0	0	2	1	0.037888	6.5	2	13	13	4	6.5	2
0	1	22627741	74682475	1	1		1	0	0	0	1	1209	1209.57	12.1	1	1	1	0	0	1	0	6	2	3	0.43	1	1	0	0	1	0	0	1	0	0	0	1	0	0.22497	18	5		18	5	18	5
1	1	22627741	74682475	1	1		0	0	0	0	1	1593	1609.51	87.9	0	1	1	1	0	1	0	6	2	3	0.43	1	1	0	0	1	0	0	0	1	0	1	1	0	0.14998	12	2		12	2	12	2
	1	22627741	74682475	1	1		1	0	0	0	1	1941	1937.36	16.3	1	1	1	1	1	1	0	8	2	4	0.31915	1	1	0	0	1	0	0	0	1	1	1	1	0	0.17498	14	2		14	2	14	2
	1	22627741	74682475	1	1		1	1	0	1	0	413	409.363	16.3	1	1	1	1	1	1	0	8	2	4	0.31915	1	1	0	0	1	0	0	0	1	1	1	1	0	0.17498	14	2		14	2	14	2
0	1	33523314	74682475	0	1	1	1	0	0	0	1	938	933.576	12.1	1	1	1	1	0	1	0	6	2	3	0.4	1	1	0	0	1	0	0	1	0	0	0	1	0	0.22497	18	5		18	5	18	5
0	1	85354786	16855476	0	1	1	1	1	0	1	0	88	88.4673	12.1	1	1	1	1	1	1	1	10	2	5	0.37	1	1	0	1	1	0	1	0	0	0	1	1	1	0.071106	10	1	10	10	1	10	1
1	1	85354786	16855476	0	1	1	0	0	0	1	0	540	591.448	191.7	0	1	1	1	0	1	1	9	3	3	0.39362	1	1	0	0	1	0	1	1	0	0	1	1	1	0.063996	9	1	9	9	1	9	1
	1	85354786	16855476	0	1	1	1	0	0	0	1	816	817.559	16.3	0	0	1	1	1	1	1	10	3	3.3333	0.37234	1	1	0	0	1	0	0	1	0	0	0	1	1	0.071106	10	1	10	10	1	10	1
0	1	33631254	13157561	0	1	1	0	1	0	1	0	256	254.399	12.1	1	0	0	1	1	1	0	11	3	3.6667	0.36	1	1	0	1	0	0	0	0	0	1	1	1	1	0.10246	17	3	17	17	3	17	3
1	1	33631254	13157561	0	1	1	1	0	0	0	1	631	650.387	83.8	0	1	1	1	1	1	1	13	3	4.3333	0.35106	1	1	0	0	0	0	0	0	0	0	0	1	1	0.11452	19	3	19	19	3	19	3
	1	33631254	13157561	0		1	1					982		16.3	1	1	1	1	0	1	1	9	4	2.25	0.39362	1	1	0	0	0	0	0	0	0	0	1	1	1	0.084382	14	3	14	14	3	14	3
0	1	33631254	13157561	0	0	1	0	0	0	0	1	952	952.401	12.1	1	0	0	1	1	1	0	11	3	3.6667	0.36	1	1	0	1	0	0	0	0	0	1	1	1	1	0.10246	17	3	17	17	3	17	3
1	1	33631254	13157561	0	1	1	1	0	0	0	1	1436	1348.39	195.3	0	1	1	1	1	1	1	13	3	4.3333	0.35106	1	1	0	0	0	0	0	0	0	0	0	1	1	0.11452	19	3	19	19	3	19	3
	1	33631254	13157561	0		1	1					1680		16.3	1	1	1	1	0	1	1	9	4	2.25	0.39362	1	1	0	0	0	0	0	0	0	0	1	1	1	0.084382	14	3	14	14	3	14	3
0	1	43842434	23583742	1	0	1	1	0	0	1	0		338.595		1	1	1	1	0	1	1	6	3	2	0.5	1	1	0	0	0	0	0	0	0	0	0	1	1	0.12603	8	2	8	8	2	8	2
0	1	17757178	35683882	0	1	1	0	1	0	1	0	309	309.525	12.1	1	0	1	0	0	1	0	5	2	2.5	0.31	0	0	0	1	1	0	0	1	0	1	1	1	1	0.10147	18	6	18	18	6	18	6
1	1	17757178	35683882	0	1	1	0	1	0	1	0	686	817.485	97.8	0	1	1	0	1	1	0	5	1	5	0.26596	1	0	0	0	0	0	0	0	0	0	1	1	0	0.10147	18	5		18	5	18	5
	1	17757178	35683882	0	1	1	0	0	0	0	0	1041	1042.56	16.3	0	1	1	0	0	1	0	4	3	1.3333	0.29787	1	0	0	0	1	0	0	1	0	0	1	2	0	0.10147	9	2		18	4	9	2
0	1	53416736	35683882	0	1	1	0	0	0	1	0	800	800.53	12.1	1	0	0	0	1	0	0	7	2	3.5	0.18	0	0	0	1	1	0	0	1	0	1	1	1	1	0.10147	18	6	18	18	6	18	6
1	1	53416736	35683882	0	1	1	0	0	0	0	1	1177	1308.5	97.8	0	1	1	0	0	0	0	6	2	3	0.23404	1	0	0	0	0	0	0	0	0	0	1	1	0	0.10147	18	5		18	5	18	5
	1	53416736	35683882	0	1	1	0	0	0	0	1	1704	1567.33	48.7	0	1	1	0	0	0	0	6	2	3	0.10638	1	0	0	0	1	0	0	1	0	0	1	2	0	0.10147	9	2		18	4	9	2
0	1	37318836	35683882	1	1	1	0	1	1	1	0	49	49.5331	12.1	1	0	1	0	0	1	0	5	2	2.5	0.28	0	0	0	1	1	0	0	1	0	1	1	1	1	0.10147	18	6	18	18	6	18	6
	1	37318836	35683882	1		1	0					953		48.7	0	1	1	0	0	1	0	3	1	3	0.42553	1	0	0	0	1	0	0	1	0	0	1	2	0	0.10147	9	2		18	4	9	2
0	1	37318836	35683882	1	1	1	0	0	0	0	1	1061	1061.54	12.1	1	0	1	0	0	1	0	5	2	2.5	0.28	0	0	0	1	1	0	0	1	0	1	1	1	1	0.10147	18	6	18	18	6	18	6
1	1	37318836	35683882	1	0	1	0	0	0	0	1	1443	1444.56	83.8	0	1	1	0	0	1	0	3	1	3	0.42553	1	0	0	0	0	0	0	0	0	0	1	1	0	0.10147	18	5		18	5	18	5
	1	37318836	35683882	1	1	1	0	0	0	0	1		1791.35		0	1	1	0	0	1	0	3	1	3	0.42553	1	0	0	0	1	0	0	1	0	0	1	2	0	0.10147	9	2		18	4	9	2
1	1	32325267	35683882	0	1		0	0	0	1	0	614	745.505	97.8	0	1	1	0	0	1	0	3	1	3	0.34043	1	0	0	0	0	0	0	0	0	0	1	1	0	0.10147	18	5		18	5	18	5
	1	32325267	35683882	0	1		0	0	0	0	0	969	970.563	16.3	0	1	1	0	1	1	0	4	1	4	0.29787	1	0	0	0	1	0	0	1	0	0	1	2	0	0.10147	9	2		18	4	9	2
0	1	24738542	23856823	1	1	1	0	0	0	1	0	730	730.49	12.1	1	1	1	0	0	1	0	5	2	2.5	0.42	1	1	0	0	0	0	0	0	0	0	1	1	0	0.10464	18	3		18	3	18	3
1	1	24738542	23856823	1	1	1	0	0	0	0	1	1219	1108.6	195.3	0	1	1	0	1	1	0	4	1	4	0.35106	1	1	0	0	0	0	0	0	0	0	1	1	0	0.10464	18	3		18	3	18	3
	1	24738542	23856823	1		1	0					1688		0	1	1	1	1	0	0	0	5	2	2.5	0.28723	1	1	0	1	0	0	0	0	0	0	1	1	0	0.12208	21	3		21	3	21	3
0	1	44672668	13815157	1	1	1	1	1	0	1	0	424	424.544	12.1	0	0	0	0	0	1	0	5	4	1.25	0.34	0	0	0	1	1	0	0	1	0	0	1	1	0	0.024774	6	2		6	2	6	2
0	1	36334334	83477732	0	0	1	1	0	0	1	0	825	819.54	29.6	1	1	1	0	0	1	0	4	4	1	0.51	1	1	0	1	0	0	0	0	0	0	1	1	0	0.026061	5	2		5	2	5	2
1	1	36334334	83477732	0	1	1	1	0	0	0	1		1207.49		1	1	1	0	0	1	0	7	5	1.4	0.30851	1	1	0	0	1	0	0	1	0	0	0	1	0	0.041698	8	2		8	2	8	2
	1	36334334	83477732	0	1	1	1	0	0	0	1	1711	1553.34	11.6	1	1	1	0	0	1	0	7	5	1.4	0.30851	1	1	0	0	0	0	0	0	0	0	1	1	0	0.031274	6	2		6	2	6	2
	1	65265372	21737448	0	1		0	1	1	1	0	139	139.425	80	1	1	1	1	1	1	0	11	3	3.6667	0.31915	1	1	0	0	1	0	0	1	0	0	1	1	1	0.096343	15	3	15	15	3	15	3
0	1	53635665	75358484	1	1	1	1	0	0	1	0	546	546.475	12.1	0	0	0	0	0	1	0	7	3	2.3333	0.31	0	1	0	1	0	0	0	0	0	0	1	1	0	0.068109	18	2		18	2	18	2
0	1	85874536	75358484	0	0	1	0	0	0	0	1	1475	1449.49	20.8	0	0	0	0	0	1	0	3	2	1.5	0.51	0	1	0	1	0	0	0	0	0	0	1	1	0	0.068109	18	2		18	2	18	2
1	1	85874536	75358484	0	0	1	1	0	0	0	1	1868	1822.56	118.9	0	1	1	0	0	1	0	3	2	1.5	0.5	1	1	0	0	1	0	1	0	0	0	1	1	0	0.075677	20	5		20	5	20	5
	1	85874536	75358484	0	1	1	1	0	0	0	1		2211.34		0	1	1	0	0	1	0	3	2	1.5	0.53191	1	1	0	0	0	0	0	0	0	0	1	1	0	0.041622	11	5		11	5	11	5
0	1	54488641	75358484	1	1	1	1	0	0	0	1		957.507		0	0	0	0	0	1	0	4	2	2	0.46	0	1	0	1	0	0	0	0	0	0	1	1	0	0.068109	18	2		18	2	18	2
1	1	54488641	75358484	1	1		0	1	0	1	0		246.567		0	1	1	0	0	1	0	6	2	3	0.39362	1	1	0	0	1	0	1	0	0	0	1	1	0	0.075677	20	5		20	5	20	5
0	1	81262436	58863227	0	0	1	1	0	0	0	1	1409	1409.54	29.6	0	0	0	1	0	1	1	6	2	3	0.48	0	1	0	0	1	0	1	1	0	0	1	1	1	0.059624	14	2	14	14	2	14	2
1	1	81262436	58863227	0	0	1	1	0	0	0	1	1787	1786.48	82.9	1	1	1	1	0	1	1	7	5	1.4	0.41489	1	1	0	0	1	0	1	1	0	1	0	1	2	0.046847	11	2	5.5	11	2	11	2
1	1	81262436	58863227	1	1		1	1	0	1	0	260	260.461	82.9	1	1	1	1	0	1	1	7	5	1.4	0.41489	1	1	0	0	1	0	1	1	0	1	0	1	2	0.046847	11	2	5.5	11	2	11	2
1	1	81262436	58863227	1	0		1	1	0	1	0		337.468		1	1	1	1	0	1	1	7	5	1.4	0.41489	1	1	0	0	1	0	1	1	0	1	0	1	2	0.046847	11	2	5.5	11	2	11	2
1	1	81262436	58863227	1	0		1	0	0	0	1	1343	1342.48	82.9	1	1	1	1	0	1	1	7	5	1.4	0.41489	1	1	0	0	1	0	1	1	0	1	0	1	2	0.046847	11	2	5.5	11	2	11	2
0	1	88827815	52564833	1	0	1	0	0	0	0	0	1218	1212.62	18.5	0	0	0	1	0	1	1	6	3	2	0.39	0	0	0	1	0	0	0	0	0	1	0	1	1	0.050656	11	2	11	11	2	11	2
0	1	33861178	52564833	0	0	1	1	1	0	1	0		538.641		0	0	0	0	0	1	1	3	2	1.5	0.49	0	0	0	1	0	0	0	0	0	1	0	1	1	0.050656	11	2	11	11	2	11	2
0	1	17632861	65743656	1	1	1	1	1	0	1	0	247	228.626	20.8	0	0	0	0	0	0	1	5	2	2.5	0.25	0	1	0	1	1	0	1	0	0	1	1	1	1	0.15607	17	3	17	17	3	17	3
1	1	17632861	65743656	1	1	1	0	1	0	1	0	684	656.384	119.1	1	1	1	0	0	0	1	6	3	2	0.18085	1	1	0	0	1	1	1	1	0	0	1	1	0	0.11934	13	3		13	3	13	3
	1	17632861	65743656	1	1	1	0	0	0	0	1	1076	1075.38	187.8	0	1	1	1	1	1	1	8	2	4	0.21277	1	1	0	0	1	0	1	0	0	0	1	1	1	0.14689	16	3	16	16	3	16	3
0	1	17632861	65743656	0	0	1	1	0	0	0	1	992	992.629	29.6	0	0	0	0	0	0	1	5	2	2.5	0.25	0	1	0	1	1	0	1	0	0	1	1	1	1	0.15607	17	3	17	17	3	17	3
1	1	17632861	65743656	0	1	1	0	0	0	0	1	1419	1450.6	227	1	1	1	0	0	0	1	6	3	2	0.18085	1	1	0	0	1	1	1	1	0	0	1	1	0	0.11934	13	3		13	3	13	3
0	1	12614124	65743656	0	0	1	0	1	1	1	0	152	152.642	29.6	0	0	0	0	0	1	1	9	3	3	0.37	0	1	0	1	1	0	1	0	0	1	1	1	1	0.15607	17	3	17	17	3	17	3
1	1	12614124	65743656	0	1	1	1	0	0	1	0	535	610.586	75.9	1	1	1	0	0	1	1	6	2	3	0.46809	1	1	0	0	1	1	1	1	0	0	1	1	0	0.11934	13	3		13	3	13	3
0	1	12614124	65743656	0	0	1	0	0	0	0	1		927.645		0	0	0	0	0	1	1	9	3	3	0.37	0	1	0	1	1	0	1	0	0	1	1	1	1	0.15607	17	3	17	17	3	17	3
1	1	12614124	65743656	0	1	1	0	0	0	0	1	1354	1385.59	227	1	1	1	0	0	1	1	6	2	3	0.46809	1	1	0	0	1	1	1	1	0	0	1	1	0	0.11934	13	3		13	3	13	3
	1	12614124	65743656	0	0	1	0	0	0	0	1	1775	1774.38	187.8	0	1	1	1	0	1	1	6	4	1.5	0.46809	1	1	0	0	1	0	1	0	0	0	1	1	1	0.14689	16	3	16	16	3	16	3
1	1	12614124	65743656	1	0		0	0	0	0	1			119.1	1	1	1	0	0	1	1	6	2	3	0.46809	1	1	0	0	1	1	1	1	0	0	1	1	0	0.11934	13	3		13	3	13	3
	1	12614124	65743656	1			0							18	0	1	1	1	0	1	1	6	4	1.5	0.46809	1	1	0	0	1	0	1	0	0	0	1	1	1	0.14689	16	3	16	16	3	16	3
0	1	62565214	63113684	0	0	1	1	0	0	1	0	696	697.447	14.1	0	0	0	1	0	1	0	5	2	2.5	0.4	0	1	0	1	1	0	0	1	0	1	1	1	1	0.047372	14	3	14	14	3	14	3
1	1	62565214	63113684	0		1	1					1149		25.1	0	1	1	1	1	1	1	15	4	3.75	0.39362	1	1	0	0	1	0	0	1	0	0	0	1	1	0.067674	20	3	20	20	3	20	3
1	1	62565214	63113684	1	1		0	1	0	1	0	295	297.602	178	0	1	1	1	1	1	1	15	4	3.75	0.39362	1	1	0	0	1	0	0	1	0	0	0	1	1	0.067674	20	3	20	20	3	20	3
	1	62565214	63113684	1	0		0	0	0	0	1	668	670.486	218.2	0	1	1	0	0	1	0	11	4	2.75	0.26596	1	1	0	0	0	0	0	0	0	0	1	1	0	0.077825	23	3		23	3	23	3
1	1	62565214	63113684	1	1		1	1	0	1	0	324	331.399	178	0	1	1	1	1	1	1	15	4	3.75	0.39362	1	1	0	0	1	0	0	1	0	0	0	1	1	0.067674	20	3	20	20	3	20	3
0	1	14228552	63113684	0	1	1	0	1	0	1	0	258	259.438	14.1	0	0	0	1	0	1	0	3	2	1.5	0.49	0	1	0	1	1	0	0	1	0	1	1	1	1	0.047372	14	3	14	14	3	14	3
1	1	14228552	63113684	0	1	1	0	0	0	0	1	661	665.394	178	0	1	1	1	0	1	0	3	1	3	0.43617	1	1	0	0	1	0	0	1	0	0	0	1	1	0.067674	20	3	20	20	3	20	3
	1	14228552	63113684	0	1	1	0	0	0	0	1	1033	1035.47	222.3	0	1	1	0	1	1	0	4	1	4	0.34043	1	1	0	0	0	0	0	0	0	0	1	1	0	0.077825	23	3		23	3	23	3
	1	14228552	63113684	0	1		0	1	0	1	0	222	223.475	218.2	0	1	1	0	1	1	0	4	1	4	0.34043	1	1	0	0	0	0	0	0	0	0	1	1	0	0.077825	23	3		23	3	23	3
	1	53578472	63113684											59.1	0	1	1									1	1	0	0	0	0	0	0	0	0	1	1	0	0.077825	23	3		23	3	23	3
0	1	67832125	33718116	1	0	1	1	0	0	0	1	759	759.624	14.1	1	1	1	1	0	1	1	10	4	2.5	0.43	1	1	0	0	1	0	1	1	0	1	0	1	2	0.30295	16	2	8	16	2	16	2
1	1	67832125	33718116	1	0	1	0	0	0	0	1	1130	1130.46	227	0	1	1	1	1	1	1	10	3	3.3333	0.39362	1	1	0	0	1	0	1	1	0	0	0	1	2	0.26508	14	2	7	14	2	14	2
	1	67832125	33718116	1	0	1	1	0	0	0	1	1643	1542.55	0	0	1	1	1	0	1	1	10	5	2	0.39362	1	1	0	0	1	0	0	1	0	0	0	1	2	0.28401	15	2	7.5	15	2	15	2
0	1	67832125	33718116	1	1	1	1	0	0	0	1	1350	1350.63	14.1	1	1	1	1	0	1	1	10	4	2.5	0.43	1	1	0	0	1	0	1	1	0	1	0	1	2	0.30295	16	2	8	16	2	16	2
1	1	67832125	33718116	1	0	1	0	0	0	0	1	1721	1721.47	227	0	1	1	1	1	1	1	10	3	3.3333	0.39362	1	1	0	0	1	0	1	1	0	0	0	1	2	0.26508	14	2	7	14	2	14	2
	1	67832125	33718116	1	0	1	1	0	0	0	1	2129	2133.56	218.2	0	1	1	1	0	1	1	10	5	2	0.39362	1	1	0	0	1	0	0	1	0	0	0	1	2	0.28401	15	2	7.5	15	2	15	2
	1	67832125	33718116											0	0	1	1	1	0	1	1	10	5	2	0.39362	1	1	0	0	1	0	0	1	0	0	0	1	2	0.28401	15	2	7.5	15	2	15	2
0	1	58388786	62227141	1	0	0	1	0	0	0	1	1651	1652.43	14.1	0	0	0	1	0	1	1	4	2	2	0.53	0	1	0	1	1	0	0	1	0	1	1	1	1	0.042626	10	3	10	10	3	10	3
1	1	58388786	62227141	1	0	0	0	0	0	0	1	2027	2025.56	209.9	0	1	1	1	0	1	1	6	3	2	0.46809	1	1	0	0	0	0	0	0	0	0	0	1	1	0.029838	7	2	7	7	2	7	2
	1	58388786	62227141	1	0	0	0	0	0	0	1	2515	2486.41	59.1	0	1	1	0	1	1	1	9	2	4.5	0.3617	1	1	0	0	1	0	0	1	0	0	0	1	0	0.042626	10	2		10	2	10	2
	1	58388786	62227141	0	0		0	0	0	1	0	533	524.51	218.2	0	1	1	0	1	1	1	9	2	4.5	0.3617	1	1	0	0	1	0	0	1	0	0	0	1	0	0.042626	10	2		10	2	10	2
0	1	58521745	77412563	1	1	1	0	0	0	0	1	672	673.446	12.1	1	1	1	1	0	1	1	3	2	1.5	0.63	1	1	1	0	1	0	1	1	1	0	1	1	1	0.19042	15	3	15	15	3	15	3
1	1	58521745	77412563	1	0	1	0	0	0	0	1	1049	1047.42	83.8	1	1	1	1	0	1	1	3	2	1.5	0.45745	1	1	0	0	1	1	1	1	1	0	1	1	1	0.17772	14	3	14	14	3	14	3
0	1	64651375	47837123	0	1	1	1	1	0	1	0	276	271.464	29.6	1	1	1	1	0	1	0	6	2	3	0.43	1	1	0	0	1	1	0	1	0	0	0	1	3	0.087728	28	8	9.3333	28	8	28	8
1	1	64651375	47837123	0	1	1	1	0	0	1	0	647	647.423	83.8	1	1	1	1	1	1	0	7	2	3.5	0.30851	1	1	0	0	1	1	0	1	0	0	0	1	4	0.075196	24	9	6	24	9	24	9
	1	64651375	47837123	0		1	1					1155		60.9	0	1	1	1	1	1	0	7	2	3.5	0.30851	1	1	0	0	1	0	0	1	0	0	0	1	4	0.072062	23	8	5.75	23	8	23	8
0	1	43431672	47837123	0	1	1	0	1	0	1	0	126	127.42	12.1	1	1	1	1	0	1	0	4	2	2	0.48	1	1	0	0	1	1	0	1	0	0	0	1	3	0.087728	28	8	9.3333	28	8	28	8
1	1	43431672	47837123	0	1	1	0	1	0	1	0	502	502.447	83.8	1	1	1	1	0	0	0	4	2	2	0.35106	1	1	0	0	1	1	0	1	0	0	0	1	4	0.075196	24	9	6	24	9	24	9
	1	43431672	47837123	0		1	0					1010		60.9	0	1	1	1	0	0	0	4	2	2	0.35106	1	1	0	0	1	0	0	1	0	0	0	1	4	0.072062	23	8	5.75	23	8	23	8
0	1	43431672	47837123	0	1	1	0	0	0	0	1	987	988.424	12.1	1	1	1	1	0	1	0	4	2	2	0.48	1	1	0	0	1	1	0	1	0	0	0	1	3	0.087728	28	8	9.3333	28	8	28	8
1	1	43431672	47837123	0	1	1	0	0	0	0	1	1365	1363.45	87.9	1	1	1	1	0	0	0	4	2	2	0.35106	1	1	0	0	1	1	0	1	0	0	0	1	4	0.075196	24	9	6	24	9	24	9
	1	43431672	47837123	0		1	0					1871		60.9	0	1	1	1	0	0	0	4	2	2	0.35106	1	1	0	0	1	0	0	1	0	0	0	1	4	0.072062	23	8	5.75	23	8	23	8
0	1	47431653	47837123	1	1	1	1	0	0	0	1	1388	1383.48	29.6	1	1	1	1	0	1	0	5	2	2.5	0.39	1	1	0	0	1	1	0	1	0	0	0	1	3	0.087728	28	8	9.3333	28	8	28	8
1	1	47431653	47837123	1	0	1	0	0	0	0	1	1759	1759.48	83.8	1	1	1	1	0	1	0	3	2	1.5	0.38298	1	1	0	0	1	1	0	1	0	0	0	1	4	0.075196	24	9	6	24	9	24	9
	1	47431653	47837123	1		1	0					2267		60.9	0	1	1	1	0	1	0	3	2	1.5	0.38298	1	1	0	0	1	0	0	1	0	0	0	1	4	0.072062	23	8	5.75	23	8	23	8
0	1	57273185	47837123	1	1	1	1	0	0	1	0	485	486.43	12.1	1	1	1	1	0	1	0	2	2	1	0.63	1	1	0	0	1	1	0	1	0	0	0	1	3	0.087728	28	8	9.3333	28	8	28	8
1	1	57273185	47837123	1	1	1	0	0	0	0	1	861	862.382	83.8	1	1	1	1	0	1	0	3	2	1.5	0.51064	1	1	0	0	1	1	0	1	0	0	0	1	4	0.075196	24	9	6	24	9	24	9
	1	57273185	47837123	1		1	0					1369		60.9	0	1	1	1	0	1	0	3	2	1.5	0.51064	1	1	0	0	1	0	0	1	0	0	0	1	4	0.072062	23	8	5.75	23	8	23	8
1	1	25353717	47837123	0	1		0	0	0	0	1	1295	1299.38	87.9	1	1	1	1	0	1	0	2	2	1	0.60638	1	1	0	0	1	1	0	1	0	0	0	1	4	0.075196	24	9	6	24	9	24	9
0	1	57177817	87625514	1	1	1	1	0	0	0	1	724	724.543	12.1	0	0	0	1	0	1	1	10	5	2	0.41	0	1	0	0	1	0	1	1	0	0	0	1	1	0.1128	10	1	10	10	1	10	1
1	1	57177817	87625514	1	1	1	0	0	0	0	1		1112.48		0	0	1	1	1	1	1	15	4	3.75	0.39362	1	1	0	0	1	0	1	1	0	0	0	1	1	0.1692	15	1	15	15	1	15	1
0	1	52716773	53457848	0	0	1	1	0	0	1	0		555.629		1	1	1	1	1	1	0	7	2	3.5	0.32	1	1	0	1	1	0	0	1	0	1	0	1	4	0.25703	33	4	8.25	33	4	33	4
1	1	52716773	53457848	0	0	1	0	0	0	0	1	924	925.613	227	0	1	1	1	1	1	0	6	1	6	0.31915	1	1	0	0	0	0	0	0	0	0	0	1	4	0.15578	20	4	5	20	4	20	4
	1	52716773	53457848	0		1	0					1331		218.2	1	1	1	1	1	1	0	7	2	3.5	0.34043	1	1	0	0	1	0	0	1	0	0	1	1	5	0.23367	30	4	6	30	4	30	4
1	1	52716773	53457848											227	0	1	1	1	1	1	0	6	1	6	0.31915	1	1	0	0	0	0	0	0	0	0	0	1	4	0.15578	20	4	5	20	4	20	4
	1	52716773	53457848											218.2	1	1	1	1	1	1	0	7	2	3.5	0.34043	1	1	0	0	1	0	0	1	0	0	1	1	5	0.23367	30	4	6	30	4	30	4
0	1	73478654	53457848	1	1	1	1	1	0	1	0	351	350.635	13.6	1	1	1	1	0	1	1	11	4	2.75	0.43	1	1	0	1	1	0	0	1	0	1	0	1	4	0.25703	33	4	8.25	33	4	33	4
1	1	73478654	53457848	1	0	1	0	0	0	0	1	719	720.604	227	0	1	1	1	0	1	1	7	4	1.75	0.41489	1	1	0	0	0	0	0	0	0	0	0	1	4	0.15578	20	4	5	20	4	20	4
	1	73478654	53457848	1		1	0					1126		218.2	1	1	1	1	0	1	1	9	4	2.25	0.39362	1	1	0	0	1	0	0	1	0	0	1	1	5	0.23367	30	4	6	30	4	30	4
0	1	24215757	21617251	0	1	1	0	0	0	0	1	1073	1073.6	29.6	0	0	0	1	1	1	1	10	3	3.3333	0.32	1	1	0	1	0	0	0	0	0	1	0	1	1	0.087298	19	2	19	19	2	19	2
1	1	24215757	21617251	1	1		0	1	1	1	0	129	129.424	75.9	1	1	1	1	0	1	1	6	2	3	0.24468	1	1	0	0	1	1	0	1	0	1	0	1	2	0.064325	14	3	7	14	3	14	3
	1	24215757	21617251	1	1		0	0	0	0	1	482	482.329	80	1	1	1	1	0	1	1	5	2	2.5	0.35106	1	1	0	0	1	0	0	1	0	0	1	1	2	0.064325	14	3	7	14	3	14	3
0	1	53872637	21617251	1	0	1	0	0	0	0	1	989	989.591	29.6	0	0	0	1	0	1	1	9	3	3	0.4	1	1	0	1	0	0	0	0	0	1	0	1	1	0.087298	19	2	19	19	2	19	2
1	1	53872637	21617251	1	1	1	0	0	0	0	1	1373	1385.31	75.9	1	1	1	1	1	1	1	7	2	3.5	0.35106	1	1	0	0	1	1	0	1	0	1	0	1	2	0.064325	14	3	7	14	3	14	3
	1	53872637	21617251	1	1	1	0	0	0	0	1	1738	1736.33	68.1	1	1	1	1	1	1	1	7	2	3.5	0.38298	1	1	0	0	1	0	0	1	0	0	1	1	2	0.064325	14	3	7	14	3	14	3
0	1	86441728	13672384	1	1		1	1	0	1	0	516	516.432	13.6	1	1	1	1	0	1	0	6	2	3	0.4	1	1	0	0	1	0	0	1	0	1	1	1	1	0.079476	16	4	16	16	4	16	4
1	1	86441728	13672384	1	1		1	0	0	0	1	901	900.499	191.7	0	1	1	1	0	1	0	6	2	3	0.3617	1	1	0	0	1	0	0	1	0	0	0	1	1	0.064575	13	3	13	13	3	13	3
	1	86441728	13672384	1	1		1	0	0	0	1	1306	1297.54	187.8	1	1	0	1	1	1	0	7	2	3.5	0.34043	1	1	0	0	1	0	0	1	0	1	0	1	1	0.074509	15	4	15	15	4	15	4
	1	86441728	13672384											229.2	1	1	0	1	1	1	0	7	2	3.5	0.34043	1	1	0	0	1	0	0	1	0	1	0	1	1	0.074509	15	4	15	15	4	15	4
0	1	16813832	13672384	0	1	1	0	0	0	0	1	1084	1072.44	18.9	1	1	1	0	0	1	0	4	2	2	0.3	1	1	0	0	1	0	0	1	0	1	1	1	1	0.079476	16	4	16	16	4	16	4
0	1	23477334	13672384	1			1					168		14.1	1	1	1	1	0	1	1	6	3	2	0.5	1	1	0	0	1	0	0	1	0	1	1	1	1	0.079476	16	4	16	16	4	16	4
1	1	23477334	13672384	1	1		1	1	0	0	1	533	536.374	224	0	1	1	1	0	1	1	5	3	1.6667	0.48936	1	1	0	0	1	0	0	1	0	0	0	1	1	0.064575	13	3	13	13	3	13	3
	1	23477334	13672384	1	1		1	0	0	0	1	932	933.394	359.1	1	1	0	1	0	0	1	5	3	1.6667	0.42553	1	1	0	0	1	0	0	1	0	1	0	1	1	0.074509	15	4	15	15	4	15	4
0	1	17758463	68582274	1	0	1	1	1	0	1	0		105.41		1	1	1	0	0	1	1	3	2	1.5	0.63	1	1	0	0	0	0	0	0	0	0	0	1	0	0.029042	6	3		6	3	6	3
0	1	34232883	72337633	1	1	1	1	0	0	1	0	723	723.608	12.1	0	0	0	0	1	1	1	14	4	3.5	0.41	0	1	0	0	1	0	1	1	0	0	1	1	0	0.13853	25	2		25	2	25	2
1	1	34232883	72337633	1	0	1	0	0	0	0	1	1115	1114.37	78.9	1	1	0	0	1	1	1	14	4	3.5	0.41	1	1	0	0	1	1	0	1	0	0	0	1	0	0.11636	21	2		21	2	21	2
	1	34232883	72337633	1	1	1	0	0	0	0	1	1448	1449.49	16.3	1	1	1	0	0	1	1	14	5	2.8	0.39362	1	1	0	0	1	0	1	0	0	0	1	1	0	0.12191	22	2		22	2	22	2
0	1	34232883	72337633	0	0	0	0	0	0	1	0	812	788.613	20.8	0	0	0	0	1	1	1	14	4	3.5	0.41	0	1	0	0	1	0	1	1	0	0	1	1	0	0.13853	25	2		25	2	25	2
1	1	34232883	72337633	0	0	0	0	0	0	0	1	1180	1179.36	78.9	1	1	0	0	1	1	1	14	4	3.5	0.41	1	1	0	0	1	1	0	1	0	0	0	1	0	0.11636	21	2		21	2	21	2
	1	34232883	72337633	0	0	0	0	0	0	0	1	1513	1514.5	16.3	1	1	1	0	0	1	1	14	5	2.8	0.39362	1	1	0	0	1	0	1	0	0	0	1	1	0	0.12191	22	2		22	2	22	2
0	1	34232883	72337633	1	1	1	1	0	0	0	1	1001	977.617	20.8	0	0	0	0	1	1	1	14	4	3.5	0.41	0	1	0	0	1	0	1	1	0	0	1	1	0	0.13853	25	2		25	2	25	2
1	1	34232883	72337633	1	1	1	1	1	0	0	1	1369	1368.35	78.9	1	1	0	0	1	1	1	14	4	3.5	0.41	1	1	0	0	1	1	0	1	0	0	0	1	0	0.11636	21	2		21	2	21	2
	1	34232883	72337633	1	1	1	0	0	0	0	1	1702	1703.51	16.3	1	1	1	0	0	1	1	14	5	2.8	0.39362	1	1	0	0	1	0	1	0	0	0	1	1	0	0.12191	22	2		22	2	22	2
	1	34232883	72337633	1	1		0	0	0	0	0	919	920.524	16.3	1	1	1	0	0	1	1	14	5	2.8	0.39362	1	1	0	0	1	0	1	0	0	0	1	1	0	0.12191	22	2		22	2	22	2
1	1	54524213	38714365	1	1		0	1	1	1	0	156	151.389	69.5	0	1	1	0	1	1	0	5	1	5	0.32979	1	1	0	0	0	0	0	0	0	0	0	1	0	0.097508	15	3		15	3	15	3
1	1	54524213	38714365	1	1		0	0	0	1	0	386	389.543	75.9	0	1	1	0	1	1	0	5	1	5	0.32979	1	1	0	0	0	0	0	0	0	0	0	1	0	0.097508	15	3		15	3	15	3
1	1	13522735	38714365	1	1		0	0	0	1	0	527	530.558	75.9	0	1	1	0	1	1	0	5	1	5	0.35106	1	1	0	0	0	0	0	0	0	0	0	1	0	0.097508	15	3		15	3	15	3
	1	13522735	38714365	1			0								1	1	1	0	0	1	0	5	2	2.5	0.38298	1	1	0	0	0	0	0	0	0	1	0	1	0	0.065005	10	3		10	3	10	3
	1	13522735	38714365											193.7	1	1	1	0	0	1	0	5	2	2.5	0.38298	1	1	0	0	0	0	0	0	0	1	0	1	0	0.065005	10	3		10	3	10	3
1	1	52421731	51718775	0	0		1	0	0	0	1	1123	1124.38	82.9	1	1	1	1	0	1	0	4	2	2	0.44681	1	1	0	0	1	1	0	1	0	1	0	1	2	0.084623	10	2	5	10	2	10	2
	1	52421731	51718775	0	1		0	0	0	0	1	1476	1480.46	59.9	0	1	1	1	0	1	0	5	3	1.6667	0.41489	1	1	0	0	0	0	0	0	0	0	0	1	2	0.067698	8	2	4	8	2	8	2
0	1	44334817	51718775	0	1	1	1	1	0	1	0	230	230.483	12.1	0	0	0	1	0	1	1	5	4	1.25	0.5	0	1	0	0	1	0	0	1	0	0	1	1	1	0.11001	13	3	13	13	3	13	3
1	1	44334817	51718775	0	0	1	1	0	0	1	0	612	613.352	82.9	1	1	1	1	0	1	1	6	3	2	0.46809	1	1	0	0	1	1	0	1	0	1	0	1	2	0.084623	10	2	5	10	2	10	2
0	1	44334817	51718775	1	1	1	1	0	0	0	1		1256.49		0	0	0	1	0	1	1	5	4	1.25	0.5	0	1	0	0	1	0	0	1	0	0	1	1	1	0.11001	13	3	13	13	3	13	3
1	1	44334817	51718775	1	0	1	1	0	0	0	1		1639.36		1	1	1	1	0	1	1	6	3	2	0.46809	1	1	0	0	1	1	0	1	0	1	0	1	2	0.084623	10	2	5	10	2	10	2
0	1	56536844	86211741	1	0	1	0	1	1	1	0	117	117.571	29.6	0	0	0	1	1	1	0	10	2	5	0.34	0	1	0	1	1	0	0	1	0	1	1	1	1	0.10033	24	2	24	24	2	24	2
1	1	56536844	86211741	1	0	1	0	0	0	1	0	501	507.479	75.9	0	1	1	1	1	1	1	4	1	4	0.52128	1	1	0	0	1	0	0	1	0	0	0	1	1	0.096147	23	3	23	23	3	23	3
0	1	13833215	86211741	1	0	0	0	0	0	1	0	381	381.584	29.6	0	0	1	1	1	1	1	14	3	4.6667	0.38	0	1	0	1	1	0	0	1	0	1	1	1	1	0.10033	24	2	24	24	2	24	2
1	1	13833215	86211741	1	1	0	0	0	0	1	0	765	771.491	75.9	0	1	1	1	1	1	1	11	3	3.6667	0.39362	1	1	0	0	1	0	0	1	0	0	0	1	1	0.096147	23	3	23	23	3	23	3
	1	13833215	86211741	1	1	0	1	0	0	0	1	1116	1130.34	80	1	1	1	1	1	1	1	15	3	5	0.39362	1	1	0	0	0	0	0	0	0	0	1	1	0	0.091967	22	2		22	2	22	2
0	1	13833215	86211741	0	0	1	1	0	0	1	0	574	574.611	29.6	0	0	1	1	1	1	1	14	3	4.6667	0.38	0	1	0	1	1	0	0	1	0	1	1	1	1	0.10033	24	2	24	24	2	24	2
1	1	13833215	86211741	0	1	1	0	0	0	0	1	958	964.503	75.9	0	1	1	1	1	1	1	11	3	3.6667	0.39362	1	1	0	0	1	0	0	1	0	0	0	1	1	0.096147	23	3	23	23	3	23	3
	1	13833215	86211741	0	0	1	1	0	0	0	1	1310	1323.34	80	1	1	1	1	1	1	1	15	3	5	0.39362	1	1	0	0	0	0	0	0	0	0	1	1	0	0.091967	22	2		22	2	22	2
0	1	13833215	86211741	1	1	1	1	0	0	1	0	782	782.591	29.6	0	0	1	1	1	1	1	14	3	4.6667	0.38	0	1	0	1	1	0	0	1	0	1	1	1	1	0.10033	24	2	24	24	2	24	2
	1	13833215	86211741	1	1	1	1	0	0	0	1	1518	1531.34	80	1	1	1	1	1	1	1	15	3	5	0.39362	1	1	0	0	0	0	0	0	0	0	1	1	0	0.091967	22	2		22	2	22	2
0	1	13833215	86211741	0	0	1	1	0	0	0	1	976	975.588	29.6	0	0	1	1	1	1	1	14	3	4.6667	0.38	0	1	0	1	1	0	0	1	0	1	1	1	1	0.10033	24	2	24	24	2	24	2
1	1	42781318	65176636	1	1		1	1	0	1	0	192	192.371	87.9	1	1	1	1	0	1	1	4	2	2	0.52128	1	1	1	0	1	1	0	1	0	1	0	1	0	0.10456	14	3		14	3	14	3
	1	42781318	65176636	1			1					549		59.9	0	1	0	0	0	1	1	3	1	3	0.45745	1	1	0	0	1	0	0	1	0	0	0	1	0	0.074685	10	3		10	3	10	3
0	1	66671588	65176636	0	1	1	0	0	0	0	1	1206	1206.46	12.1	0	0	0	0	0	1	1	4	2	2	0.5	0	1	0	0	0	0	0	0	0	0	1	1	0	0.082154	11	3		11	3	11	3
1	1	66671588	65176636	0	1	1	0	0	0	0	1	1583	1584.38	83.8	1	1	1	0	0	1	1	6	2	3	0.43617	1	1	1	0	1	1	0	1	0	1	0	1	0	0.10456	14	3		14	3	14	3
	1	68847157	65176636											60.9	0	1	0									1	1	0	0	1	0	0	1	0	0	0	1	0	0.074685	10	3		10	3	10	3
0	1	76175762	52128546	1	0	1	1	0	0	1	0	71	70.7027	12.1	0	0	0	1	0	1	0	3	2	1.5	0.71	1	1	0	0	0	0	0	0	0	0	1	1	1	0.041245	7	5	7	7	5	7	5
1	1	76175762	52128546	1	0	1	1	1	0	1	0	450	448.481	87.9	1	1	0	1	0	1	0	3	2	1.5	0.53191	1	1	0	0	1	1	0	1	0	0	1	1	1	0.064813	11	5	11	11	5	11	5
	1	76175762	52128546	1		1	1					955		60.9	0	1	1	1	1	1	0	4	1	4	0.39362	1	1	0	0	0	0	0	0	0	0	0	1	1	0.070705	12	5	12	12	5	12	5
0	1	13858252	11146635	0	0	1	0	0	0	0	1	1032	1028.48	18.5	0	0	0	1	0	1	0	4	2	2	0.46	0	1	0	0	1	0	0	1	0	0	1	1	1	0.03091	17	3	17	17	3	17	3
1	1	13858252	11146635	0		1	0					1398		87.9	1	1	1	1	0	1	0	4	2	2	0.46	1	1	0	0	1	0	0	1	0	0	1	1	1	0.029092	16	3	16	16	3	16	3
	1	13858252	11146635	0	0	1	1	0	0	0	1	1756	1756.38	59.9	1	1	1	1	0	1	1	3	2	1.5	0.60638	1	1	0	0	1	0	1	1	0	1	1	1	1	0.016364	9	3	9	9	3	9	3
1	1	31146122	11146635	1	0		1	0	0	1	0	236	237.388	83.8	1	1	1	1	1	1	1	7	2	3.5	0.41489	1	1	0	0	1	0	0	1	0	0	1	1	1	0.029092	16	3	16	16	3	16	3
	1	31146122	11146635	1	0		1	0	0	1	0	594	595.379	59.9	1	1	1	1	0	1	0	3	2	1.5	0.53191	1	1	0	0	1	0	1	1	0	1	1	1	1	0.016364	9	3	9	9	3	9	3
	1	62436651	48456666											11.6	0	1	1	0	0	1	1	8	5	2.6	0.43	1	1	0	0	1	0	0	1	0	0	0	1	0	0.096554	12	1		12	1	12	1
0	1	77286818	34446154	0	1	1	0	0	0	1	0	569	570.45	29.6					0	1	1	4	5	0.8	0.44681	0	1	0	0	0	0	0	0	0	0	1	1	1	0.032639	9	3	9	9	3	9	3
0	1	33278756	14845885	0	0	1	0	1	0	1	0	183	177.544	18.5	1	1	0	1	0	1	1	4	4	1	0.58	1	1	0	0	1	0	0	1	0	0	1	1	1	0.023899	4	1	4	4	1	4	1
1	1	33278756	14845885	0	1	1	1	0	0	1	0	545	545.49	83.8	0	1	1	1	0	1	1	5	3	1.6667	0.48936	1	1	0	0	1	0	0	1	0	0	1	1	1	0.029874	5	1	5	5	1	5	1
	1	33278756	14845885	0		1	1					904		59.9	1	1	1	1	0	1	1	5	3	1.6667	0.48936	1	1	0	0	1	0	0	1	0	0	1	1	1	0.029874	5	1	5	5	1	5	1
0	1	14464551	83127512	0	1	1	1	1	0	1	0	229	230.398	29.6	0	0	0	1	0	1	0	4	2	2	0.63	0	1	0	1	1	0	0	1	0	1	1	1	2	0.070163	17	3	8.5	17	3	17	3
1	1	14464551	83127512	0	1	1	1	0	0	1	1	604	606.486	82.9	0	1	1	1	0	1	0	5	2	2.5	0.38298	1	1	0	0	1	0	1	1	0	0	0	1	2	0.061909	15	3	7.5	15	3	15	3
	1	14464551	83127512	0	1	1	1	0	0	0	1	970	975.466	80	1	1	1	1	0	1	0	5	2	2.5	0.38298	1	1	0	1	1	0	1	1	0	0	0	1	2	0.066036	16	3	8	16	3	16	3
0	1	22786377	83127512	1	1	1	1	1	0	1	0	111	107.411	18.5	0	0	0	1	0	1	1	8	3	2.6667	0.43	0	1	0	1	1	0	0	1	0	1	1	1	2	0.070163	17	3	8.5	17	3	17	3
1	1	22786377	83127512	1	1	1	1	1	0	1	0	481	483.498	82.9	0	1	1	1	0	1	1	6	4	1.5	0.46809	1	1	0	0	1	0	1	1	0	0	0	1	2	0.061909	15	3	7.5	15	3	15	3
	1	22786377	83127512	1	0	1	0	0	0	0	1	847	852.472	80	1	1	1	1	0	1	1	10	4	2.5	0.55319	1	1	0	1	1	0	1	1	0	0	0	1	2	0.066036	16	3	8	16	3	16	3
	1	22786377	83127512	1	1		1	1	0	1	0	326	332.474	80	1	1	1	1	0	1	1	10	4	2.5	0.55319	1	1	0	1	1	0	1	1	0	0	0	1	2	0.066036	16	3	8	16	3	16	3
	1	32558621	83127512											24.2	1	1	1									1	1	0	1	1	0	1	1	0	0	0	1	2	0.066036	16	3	8	16	3	16	3
1	1	84871156	54313161	1	1		1	0	0	1	0	611	730.444	82.9	0	1	1	1	1	1	0	12	3	4	0.31915	1	1	0	0	1	0	0	1	0	0	0	1	1	0.00098231	12	1	12	12	1	12	1
	1	84871156	54313161	1	1		1	0	0	0	0	970	975.501	80	0	1	1	1	0	1	0	9	4	2.25	0.31915	1	1	0	0	0	0	0	0	0	0	0	1	1	0.00073673	9	1	9	9	1	9	1
1	1	84871156	54313161	0	1		1	0	0	0	1	1604	1723.45	82.9	0	1	1	1	1	1	0	12	3	4	0.31915	1	1	0	0	1	0	0	1	0	0	0	1	1	0.00098231	12	1	12	12	1	12	1
	1	84871156	54313161	0			1					1975		68.1	0	1	1	1	0	1	0	9	4	2.25	0.31915	1	1	0	0	0	0	0	0	0	0	0	1	1	0.00073673	9	1	9	9	1	9	1
0	1	66423818	57128564	1	1	1	1	0	0	1	0	400	400.574	18.5	1	0	1	0	0	1	0	4	2	2	0.34	0	1	0	1	1	0	0	1	0	1	1	1	0	0.067158	13	4		13	4	13	4
	1	16466642	61613887											0	1	1	1	1	0	1	1	7	5	1.4	0.41489	1	1	0	0	1	1	0	0	0	0	0	1	1	0.055925	10	2	10	10	2	10	2
0	1	56764743	18663646	0	0	1	0	0	0	0	1	997	1000.55	20.5	1	1	0	0	0	1	1	5	3	1.6667	0.46	0	1	0	1	1	0	1	1	0	1	1	1	0	0.050311	9	2		9	2	9	2
0	1	52634832	11778728	1	1	1	0	1	0	1	0	1158	1158.51	20.5	1	0	1	1	0	1	1	3	2	1.5	0.59	0	0	0	0	1	1	0	0	0	0	0	0	1	0.096824			13	13	2
1	1	52634832	11778728	0	1		0	1	0	1	0		177.603		1	1	1	1	1	1	1	4	1	4	0.45745	1	1	0	0	1	0	0	1	0	0	0	1	1	0.059584	8	2	8	8	2	8	2
	1	52634832	11778728	0	1		0	0	0	1	0	548	557.324	68.1	0	1	1	0	0	1	1	4	2	2	0.37234	1	1	0	0	0	0	0	0	0	0	0	1	1	0.067032	9	2	9	9	2	9	2
	1	32585535	88366471	1	1		0	1	0	1	0	281	280.5	80	0	1	1	0	0	1	0	3	1	3	0.38298	1	1	0	0	1	0	0	1	0	0	0	1	1	0.074471	17	5	17	17	5	17	5
0	1	18266172	57811485	1	0	1	0	0	0	0	1	777	777.774	18.5	1	0	0	1	1	1	1	11	3	3.6667	0.41	0	1	0	1	1	0	1	1	0	1	1	1	1	0.12344	14	2	14	14	2	14	2
1	1	18266172	57811485	1	0	1	0	0	0	0	1	1154	1158.62	72.8	0	1	1	1	1	1	1	15	3	5	0.39362	1	1	0	0	1	0	1	1	0	0	0	1	1	0.1587	18	2	18	18	2	18	2
0	1	18266172	57811485	0	1	0	1	0	0	0	1	1430	1431.03	18.5	1	0	0	1	1	1	1	11	3	3.6667	0.41	0	1	0	1	1	0	1	1	0	1	1	1	1	0.12344	14	2	14	14	2	14	2
1	1	18266172	57811485	0	1	0	0	0	0	0	1	1807	1811.63	72.8	0	1	1	1	1	1	1	15	3	5	0.39362	1	1	0	0	1	0	1	1	0	0	0	1	1	0.1587	18	2	18	18	2	18	2
	1	18266172	57811485	0	1	0	1	0	0	0	1	2157	2163.41	80	0	1	1	1	0	1	1	6	3	2	0.44681	1	1	0	0	1	0	1	1	0	0	0	1	1	0.079352	9	2	9	9	2	9	2
0	1	56262178	64688881	1	1	1	0	0	0	0	1	742	742.534	18.5	0	0	0	1	1	1	1	12	3	4	0.3	0	0	0	0	0	0	0	0	0	0	1	0	1	0.062482			17	17	2
1	1	56262178	64688881	1	0	1	0	0	0	0	1	1121	1119.37	78.9	0	1	1	1	1	1	1	11	2	5.5	0.24468	1	0	1	0	1	0	0	1	0	0	1	1	1	0.058807	16	2	16	16	2	16	2
	1	56262178	64688881	1	0	1	0	0	0	0	1	1611	1473.48	60.9	0	1	1	1	1	1	1	10	3	3.3333	0.24468	1	0	0	0	1	0	0	1	0	0	0	1	1	0.058807	16	2	16	16	2	16	2
0	1	55587853	58444314	0	1	1	1	1	0	1	0	240	239.556	20.8	0	0	0	1	0	1	1	4	2	2	0.44	1	1	1	1	0	0	0	0	0	1	0	1	1	0.083501	12	2	12	12	2	12	2
0	1	55587853	58444314	0		1	1	0	0	0	1		1034.56		0	0	0	1	0	1	1	4	2	2	0.44	1	1	1	1	0	0	0	0	0	1	0	1	1	0.083501	12	2	12	12	2	12	2
0	1	58866751	58444314	1	1	1	0	0	0	1	0		533.573		0	0	0	1	0	1	0	5	2	2.5	0.26	1	1	1	1	0	0	0	0	0	1	0	1	1	0.083501	12	2	12	12	2	12	2
0	1	58866751	58444314	1	1	1	0	0	0	0	1		994.576		0	0	0	1	0	1	0	5	2	2.5	0.26	1	1	1	1	0	0	0	0	0	1	0	1	1	0.083501	12	2	12	12	2	12	2
0	1	51111165	86116266	0	0	1	1	0	0	0	0		997.401		1	1	1	1	0	1	0	5	2	2.5	0.42	1	1	0	0	1	0	0	1	0	1	1	1	1	0.079095	16	5	16	16	5	16	5
1	1	51111165	86116266	0	1	1	1	0	0	0	1		1363.48		0	1	1	1	1	1	0	4	1	4	0.41489	1	1	0	0	1	0	0	1	0	0	1	1	1	0.093925	19	6	19	19	6	19	6
1	1	51111165	86116266	0	1		1	1	0	1	0	265	269.488	83.8	0	1	1	1	1	1	0	4	1	4	0.41489	1	1	0	0	1	0	0	1	0	0	1	1	1	0.093925	19	6	19	19	6	19	6
	1	51111165	86116266	0	1		1	0	0	0	1	622	622.382	59.9	1	1	1	1	0	1	0	3	2	1.5	0.53191	1	1	0	0	0	0	0	0	0	0	1	1	1	0.098869	20	6	20	20	6	20	6
	1	66855747	86116266	1	1		1	1	1	1	0		80.4039		1	1	1	1	0	1	0	4	3	1.3333	0.47872	1	1	0	0	0	0	0	0	0	0	1	1	1	0.098869	20	6	20	20	6	20	6
	1	86224833	86116266	0	1		0	0	0	0	1	666	666.396	59.9	1	1	1	1	0	1	0	4	2	2	0.25532	1	1	0	0	0	0	0	0	0	0	1	1	1	0.098869	20	6	20	20	6	20	6
	1	86224833	86116266	1	1		0	0	0	0	1		2022.4		1	1	1	1	0	1	0	4	2	2	0.25532	1	1	0	0	0	0	0	0	0	0	1	1	1	0.098869	20	6	20	20	6	20	6
1	0	72438765	34226533											58	1	0	1	1	1	1	0	10	2	5	0.31915	0	1	0	1	1	0	0	1	0	0	0	1	1	0.099241	18	3	18	18	3	18	3
	0	72438765	34226533											11.6	1	1	1	1	1	1	0	10	2	5	0.31915	1	1	1	1	1	0	0	1	0	1	1	1	1	0.055134	10	2	10	10	2	10	2
	0	72438765	34226533												1	1	1	1	1	1	0	10	2	5	0.31915	1	1	1	1	1	0	0	1	0	1	1	1	1	0.055134	10	2	10	10	2	10	2
0	0	26478611	34226533	0	1	1	1	1	1	1	0		309.706		0	0	0	1	0	1	1	5	2	2.5	0.47	0	1	0	1	0	0	0	0	0	1	0	1	1	0.077187	14	3	14	14	3	14	3
0	0	26478611	34226533	0	1	1	1	0	0	0	1		802.625		0	0	0	1	0	1	1	5	2	2.5	0.47	0	1	0	1	0	0	0	0	0	1	0	1	1	0.077187	14	3	14	14	3	14	3
	0	68317413	34226533											48.7	1	1	1									1	1	1	1	1	0	0	1	0	1	1	1	1	0.055134	10	2	10	10	2	10	2
1	1	53262881	43841811	0	1		1	1	0	1	0	227	228.451	87.9	1	1	0	1	0	1	0	3	2	1.5	0.53191	1	1	1	0	1	1	1	1	0	1	1	1	1	0.075645	24	6	24	24	6	24	6
	1	53262881	43841811	0	1		0	0	0	1	0	662	665.447	242.1	0	1	1	1	0	1	0	2	2	1	0.60638	1	1	0	0	0	0	0	0	0	0	0	1	1	0.059886	19	5	19	19	5	19	5
1	1	47648151	43841811	1	1		1	1	1	1	0	82	83.4051	87.9	1	1	0	1	0	0	0	3	1	3	0.3617	1	1	1	0	1	1	1	1	0	1	1	1	1	0.075645	24	6	24	24	6	24	6
	1	47648151	43841811	1	1		0	0	0	1	0	534	535.495	244.1	0	1	1	1	0	1	0	2	1	2	0.5	1	1	0	0	0	0	0	0	0	0	0	1	1	0.059886	19	5	19	19	5	19	5
1	1	56518237	43841811	1	1		1	1	0	1	0	294	295.481	87.9	1	1	0	1	0	1	0	5	2	2.5	0.38298	1	1	1	0	1	1	1	1	0	1	1	1	1	0.075645	24	6	24	24	6	24	6
	1	56518237	43841811	1	1		0	0	0	0	1	729	732.436	242.1	0	1	1	1	0	1	0	5	2	2.5	0.38298	1	1	0	0	0	0	0	0	0	0	0	1	1	0.059886	19	5	19	19	5	19	5
0	1	85376413	45146463	0	1	1	0	0	0	0	1		1067.58		1	1	1	1	1	1	0	10	3	3.3333	0.36	1	1	0	0	1	0	0	1	0	0	0	1	2	0.083704	15	4	7.5	15	4	15	4
1	1	85376413	45146463	0	0	1	0	0	0	0	1	1487	1554.42	227	0	1	1	1	1	1	0	10	3	3.3333	0.31915	1	1	0	0	1	0	0	1	0	0	0	1	2	0.083704	15	4	7.5	15	4	15	4
	1	85376413	45146463	0	0	1	0	0	0	0	1	1944	1792.45	11.6	0	1	0	1	1	1	0	11	3	3.6667	0.31915	1	1	0	0	0	0	0	0	0	0	0	1	2	0.089284	16	4	8	16	4	16	4
	1	85376413	45146463	0	0		0	0	0	1	0	387	388.591	59.9	0	1	0	1	1	1	0	11	3	3.6667	0.31915	1	1	0	0	0	0	0	0	0	0	0	1	2	0.089284	16	4	8	16	4	16	4
0	1	34446812	58513242	1	1	1	0	1	0	1	0	516	519.506	13.6	0	0	0	1	0	0	0	5	2	2.5	0.22	0	1	0	1	1	0	0	1	0	1	0	1	1	0.045065	17	3	17	17	3	17	3
1	1	34446812	58513242	1	1	1	0	0	0	0	1	939	888.396	157.2	0	1	1	1	1	0	0	8	2	4	0.06383	1	1	0	0	1	0	0	1	0	0	0	1	1	0.05832	22	3	22	22	3	22	3
	1	34446812	58513242	1	1	1	0	0	0	0	1	1354	1354.44	48.7	0	1	1	0	1	0	0	8	2	4	0.031915	1	1	0	0	1	0	0	1	0	0	0	1	2	0.055669	21	3	10.5	21	3	21	3
0	1	34446812	58513242	1	1	1	0	0	0	0	1	1045	1048.51	13.6	0	0	0	1	0	0	0	5	2	2.5	0.22	0	1	0	1	1	0	0	1	0	1	0	1	1	0.045065	17	3	17	17	3	17	3
1	1	34446812	58513242	1	1	1	0	0	0	0	1	1468	1417.4	157.2	0	1	1	1	1	0	0	8	2	4	0.06383	1	1	0	0	1	0	0	1	0	0	0	1	1	0.05832	22	3	22	22	3	22	3
	1	34446812	58513242	1	1	1	0	0	0	0	1	1883	1883.45	48.7	0	1	1	0	1	0	0	8	2	4	0.031915	1	1	0	0	1	0	0	1	0	0	0	1	2	0.055669	21	3	10.5	21	3	21	3
0	1	88267322	58513242	1	1	1	0	0	0	0	1	1262	1265.51	13.6	0	0	0	1	1	1	0	8	2	4	0.31	0	1	0	1	1	0	0	1	0	1	0	1	1	0.045065	17	3	17	17	3	17	3
1	1	88267322	58513242	1	0	1	0	0	0	0	1	1692	1699.57	107.9	0	1	1	1	1	0	0	13	1	13	0.10638	1	1	0	0	1	0	0	1	0	0	0	1	1	0.05832	22	3	22	22	3	22	3
	1	88267322	58513242	1	0	1	0	0	0	0	1		2100.46		0	1	1	1	1	1	0	12	3	4	0.25532	1	1	0	0	1	0	0	1	0	0	0	1	2	0.055669	21	3	10.5	21	3	21	3
1	1	88267322	58513242	0	1		0	1	1	1	0	167	159.466	157.2	0	1	1	1	1	0	0	13	1	13	0.10638	1	1	0	0	1	0	0	1	0	0	0	1	1	0.05832	22	3	22	22	3	22	3
	1	88267322	58513242	0	1		1	0	0	1	0	606	582.455	59.1	0	1	1	1	1	1	0	12	3	4	0.25532	1	1	0	0	1	0	0	1	0	0	0	1	2	0.055669	21	3	10.5	21	3	21	3
0	1	32325264	82133122	1	1		1	0	0	0	1		1341.67		1	1	1	1	0	1	1	9	4	2.25	0.43	1	1	0	1	1	0	0	1	0	1	1	1	3	0.17768	25	3	8.3333	25	3	25	3
	1	32325264	82133122	0	1		0	1	0	1	0	310	314.341	218.2	0	1	1	1	0	1	1	8	4	2	0.39362	1	1	0	0	0	0	0	0	0	0	0	1	3	0.12793	18	3	6	18	3	18	3
0	1	41154117	82133122	1	1		0	1	0	1	0	313	314.426	13.6	1	1	1	1	0	1	0	11	4	2.75	0.36	1	1	0	1	1	0	0	1	0	1	1	1	3	0.17768	25	3	8.3333	25	3	25	3
1	1	41154117	82133122	1			0					765		25.1	0	1	1	1	0	1	0	5	2	2.5	0.30851	1	1	0	0	1	0	0	1	0	0	0	1	2	0.10661	15	3	7.5	15	3	15	3
	1	41154117	82133122	1	1		0	0	0	0	1	1088	1169.23	218.2	0	1	1	1	0	0	0	9	5	1.8	0.25532	1	1	0	0	0	0	0	0	0	0	0	1	3	0.12793	18	3	6	18	3	18	3
0	1	41154117	82133122	1	1		0	0	0	0	1		789.429		1	1	1	1	0	1	0	11	4	2.75	0.36	1	1	0	1	1	0	0	1	0	1	1	1	3	0.17768	25	3	8.3333	25	3	25	3
	1	41154117	82133122	1	1		0	0	0	0	1	1670	1566.37	0	0	1	1	1	0	0	0	9	5	1.8	0.25532	1	1	0	0	0	0	0	0	0	0	0	1	3	0.12793	18	3	6	18	3	18	3
0	1	75335841	51615317	0	1	1	0	0	0	0	1	1030	1030.7	13.6	0	0	0	1	0	1	0	6	2	3	0.38	0	1	0	1	0	0	0	0	0	1	0	1	1	0.077611	13	3	13	13	3	13	3
1	1	75335841	51615317	0	1	1	0	0	0	0	1	1415	1474.31	191.7	1	1	1	1	0	1	0	6	2	3	0.3617	1	1	0	0	1	0	0	1	0	0	1	1	1	0.077611	13	3	13	13	3	13	3
	1	75335841	51615317	0	1	1	0	0	0	0	1	1892	1787.4	59.1	0	1	1	1	0	1	0	6	2	3	0.39362	1	1	0	0	1	0	0	1	0	0	0	1	1	0.089551	15	3	15	15	3	15	3
	1	38428853	81433262	0	0		0	0	0	0	1	763	763.392	222	1	1	1	1	0	1	1	4	2	2	0.55319	1	1	0	0	0	0	0	0	0	0	0	1	1	0.061688	9	4	9	9	4	9	4
0	1	78828368	38323872	0	0	1	1	0	0	0	1	825	825.513	12.6	1	0	1	1	0	1	1	4	2	2	0.55	1	1	0	1	0	0	0	0	0	1	0	1	1	0.053644	25	8	25	25	8	25	8
0	1	57875228	72214617	0	1	1	0	1	0	1	0	121	124.542	13.6	0	0	0	1	0	1	1	7	3	2.3333	0.43	0	1	0	1	1	0	1	1	0	1	0	1	1	0.096734	16	3	16	16	3	16	3
1	1	57875228	72214617	0	1	1	0	0	0	1	0	489	489.464	227	1	1	1	0	1	1	1	7	2	3.5	0.38298	1	1	0	0	1	0	0	1	0	1	1	1	1	0.096734	16	3	16	16	3	16	3
	1	57875228	72214617	0	1	1	0	0	0	0	1	890	888.386	238	0	1	1	0	0	1	1	7	3	2.3333	0.41489	1	1	0	0	1	0	0	1	0	0	1	1	0	0.090688	15	3		15	3	15	3
0	1	77576225	14367882	0	1	1	0	0	0	0	0	996	994.559	19.2	0	0	0	1	1	1	0	10	2	5	0.3	1	1	0	1	1	0	0	1	0	1	0	1	1	0.043552	17	4	17	17	4	17	4
0	1	57223637	14367882	0	1	1	1	1	0	1	0	362	360.572	19.2	0	0	0	1	0	1	1	3	2	1.5	0.6	1	1	0	1	1	0	0	1	0	1	0	1	1	0.043552	17	4	17	17	4	17	4
1	1	57223637	14367882	0	1	1	0	0	0	0	1	767	728.457	194.3	1	1	1	1	0	1	1	3	2	1.5	0.57447	1	1	0	0	1	0	0	1	0	0	1	1	1	0.033305	13	3	13	13	3	13	3
	1	27476645	14367882	0	0		0	0	0	0	1	722	722.359	222.3	1	1	1	0	0	1	0	6	2	3	0.39362	1	1	0	0	0	0	0	0	0	0	1	1	1	0.023057	9	4	9	9	4	9	4
0	1	24617252	26314238	0	0	1	0	0	0	0	1	676	676.561	18.7	0	0	0	1	1	1	1	18	2	9	0.41	0	1	0	0	1	0	0	1	0	0	0	1	1	0.1842	18	1	18	18	1	18	1
1	1	24617252	26314238	0	1	1	1	0	0	0	1	1058	1045.55	191.7	0	1	1	1	1	1	1	17	4	4.25	0.39362	1	1	0	0	0	0	0	0	0	0	0	1	1	0.17396	17	1	17	17	1	17	1
	1	24617252	26314238	0	0	1	0	0	0	0	1		1438.42		0	1	1	1	0	1	1	6	4	1.5	0.46809	1	1	0	0	0	0	0	0	0	0	1	1	1	0.061399	6	1	6	6	1	6	1
0	1	24617252	26314238	1	0	1	0	0	0	0	1	1020	1020.56	18.7	0	0	0	1	1	1	1	18	2	9	0.41	0	1	0	0	1	0	0	1	0	0	0	1	1	0.1842	18	1	18	18	1	18	1
1	1	24617252	26314238	1		1	0					1468		25.1	0	1	1	1	1	1	1	17	4	4.25	0.39362	1	1	0	0	0	0	0	0	0	0	0	1	1	0.17396	17	1	17	17	1	17	1
	1	24617252	26314238	1	0	1	0	0	0	0	1		1782.43		0	1	1	1	0	1	1	6	4	1.5	0.46809	1	1	0	0	0	0	0	0	0	0	1	1	1	0.061399	6	1	6	6	1	6	1
1	1	24617252	26314238	0	1		1	0	0	0	1		1785.56		0	1	1	1	1	1	1	17	4	4.25	0.39362	1	1	0	0	0	0	0	0	0	0	0	1	1	0.17396	17	1	17	17	1	17	1
	1	24617252	26314238	0	1		0	0	0	1	0	183	186.436	359.1	0	1	1	1	0	1	1	6	4	1.5	0.46809	1	1	0	0	0	0	0	0	0	0	1	1	1	0.061399	6	1	6	6	1	6	1
0	1	41556735	81872478	0	1	1	0	1	1	1	0	600	601.548	19.2	1	1	1	1	0	1	1	4	2	2	0.51	1	1	0	0	1	0	1	1	0	0	1	1	1	0.10037	13	4	13	13	4	13	4
1	1	41556735	81872478	0	1	1	0	0	0	0	1	1025	1033.29	107.9	0	1	1	1	1	1	1	5	1	5	0.34043	1	1	0	0	1	0	1	1	0	0	0	1	1	0.10809	14	3	14	14	3	14	3
	1	41556735	81872478	0	1	1	0	0	0	0	1	1364	1364.37	238	1	1	1	1	0	1	1	4	2	2	0.40426	1	1	0	0	1	0	1	1	0	0	1	0	1	0.084927			11	11	3
	1	41556735	81872478	1	1		0	1	0	1	0			359.1	1	1	1	1	0	1	1	4	2	2	0.40426	1	1	0	0	1	0	1	1	0	0	1	0	1	0.084927			11	11	3
0	1	86771576	81872478	1	0	1	0	0	0	0	0	1502	1503.55	19.2	1	1	1	1	0	1	0	4	2	2	0.44	1	1	0	0	1	0	1	1	0	0	1	1	1	0.10037	13	4	13	13	4	13	4
1	1	86771576	81872478	1	1	1	0	0	0	0	1	1861	1864.39	224	0	1	1	0	0	1	1	3	1	3	0.48936	1	1	0	0	1	0	1	1	0	0	0	1	1	0.10809	14	3	14	14	3	14	3
	1	86771576	81872478	1	1	1	0	0	0	0	1	2260	2266.37	359.1	1	1	1	1	0	1	1	4	2	2	0.35106	1	1	0	0	1	0	1	1	0	0	1	0	1	0.084927			11	11	3
0	1	32385547	66217333	1	1	1	0	0	0	1	0	822	822.575	18.7	0	0	0	0	0	1	1	3	2	1.5	0.75	0	1	0	1	1	0	0	1	0	1	1	1	0	0.097186	23	11		23	11	23	11
1	1	32385547	66217333	1	1	1	1	0	0	0	1	1220	1219.46	178	0	1	1	0	0	1	1	3	1	3	0.60638	1	1	0	0	1	0	0	1	0	0	1	2	0	0.10564	12.5	6		25	12	12.5	6
	1	52546725	66217333	0			0					1302		218.2	1	1	1	1	0	1	1	4	2	2	0.48936	1	1	0	0	0	0	0	0	0	1	1	2	0	0.11409	13.5	5.5		27	11	13.5	5.5
0	1	68684653	66217333	0	1	1	1	0	0	0	1	630	630.559	18.7	0	0	0	0	0	1	1	3	1	3	0.68	0	1	0	1	1	0	0	1	0	1	1	1	0	0.097186	23	11		23	11	23	11
1	1	68684653	66217333	0	0	1	0	0	0	0	1	1028	1049.42	178	0	1	1	0	1	1	1	4	1	4	0.48936	1	1	0	0	1	0	0	1	0	0	1	2	0	0.10564	12.5	6		25	12	12.5	6
	1	58844635	66217333	0	1		0	1	1	1	0	36	40.3924	218.2	1	1	1	0	0	1	1	5	2	2.5	0.64894	1	1	0	0	0	0	0	0	0	1	1	2	0	0.11409	13.5	5.5		27	11	13.5	5.5
1	1	42442324	66217333	1	1		0	0	0	0	1	803	802.479	178	0	1	1	0	0	1	1	2	1	2	0.60638	1	1	0	0	1	0	0	1	0	0	1	2	0	0.10564	12.5	6		25	12	12.5	6
	1	42442324	66217333	1	1		1	0	0	0	1	1178	1182.38	218.2	1	1	1	0	0	1	1	4	2	2	0.52128	1	1	0	0	0	0	0	0	0	1	1	2	0	0.11409	13.5	5.5		27	11	13.5	5.5
	1	42442324	66217333	1	1		1	1	1	1	0	126	131.384	218.2	1	1	1	0	0	1	1	4	2	2	0.52128	1	1	0	0	0	0	0	0	0	1	1	2	0	0.11409	13.5	5.5		27	11	13.5	5.5
1	1	87645278	66217333	0	1		0	1	0	1	0	149	148.514	178	0	1	1	0	0	1	1	2	1	2	0.46809	1	1	0	0	1	0	0	1	0	0	1	2	0	0.10564	12.5	6		25	12	12.5	6
	1	87645278	66217333	0	1		0	0	0	1	0	524	525.404	218.2	1	1	1	0	0	1	1	2	2	1	0.48936	1	1	0	0	0	0	0	0	0	1	1	2	0	0.11409	13.5	5.5		27	11	13.5	5.5
0	1	51422361	66217333	1	1	1	0	0	0	0	1	916	915.589	19.2	0	0	0	0	0	1	1	3	2	1.5	0.73	0	1	0	1	1	0	0	1	0	1	1	1	0	0.097186	23	11		23	11	23	11
0	1	72524771	45415434	1	0	0	0	0	0	0	1				0	0	0	1	0	1	1	8	3	2.6667	0.38	0	1	0	0	1	0	0	1	0	0	1	1	1	0.044198	12	3	12	12	3	12	3
0	1	75715815	45415434	0	1	1	0	0	0	1	0	455	454.487	19.2	0	0	0	1	0	1	1	4	2	2	0.53	0	1	0	0	1	0	0	1	0	0	1	1	1	0.044198	12	3	12	12	3	12	3
0	0	58238877	44132567	1	1	1	0	1	0	1	0	515	511.564	33	1	0	1	1	0	1	0	3	2	1.5	0.42	1	1	0	0	0	0	0	0	0	0	1	2	0	0.038888	16	10.5		32	21	16	10.5
1	0	58238877	44132567	1	1	1	0	0	0	0	1	921	921.4	7.6	1	1	0	1	0	1	0	3	2	1.5	0.5	1	1	1	0	0	0	0	0	0	0	1	1	2	0.065623	54	21	27	54	21	54	21
	0	58238877	44132567	1	0	1	0	0	0	0	1	1299	1664.39	44	0	0	1	1	1	1	1	4	1	4	0.32979	1	1	0	1	1	0	0	1	0	0	0	1	1	0.065623	54	15	54	54	15	54	15
	0	58238877	44132567	0	0		1	0	0	1	0	342	573.399	42.2	0	0	1	1	1	1	1	4	1	4	0.32979	1	1	0	1	1	0	0	1	0	0	0	1	1	0.065623	54	15	54	54	15	54	15
0	0	88321133	44132567	0	1	1	0	0	0	1	0	1006	1006.58	33	1	1	1	1	0	1	0	6	2	3	0.4	1	1	0	0	0	0	0	0	0	0	1	2	0	0.038888	16	10.5		32	21	16	10.5
1	0	88321133	44132567	0	0	1	0	0	0	0	1	1767	1416.43	14.2	1	1	0	1	1	1	0	4	1	4	0.35106	1	1	1	0	0	0	0	0	0	0	1	1	2	0.065623	54	21	27	54	21	54	21
	0	88321133	44132567	0	1	1	0	0	0	0	1	1794	1794.51	44	0	0	1	1	1	1	1	4	1	4	0.37234	1	1	0	1	1	0	0	1	0	0	0	1	1	0.065623	54	15	54	54	15	54	15
0	0	37713348	44132567	0	1		1	0	0	0	0	1364	1365.42	33	0	1	1	1	0	1	1	5	3	1.6667	0.5	1	1	0	0	0	0	0	0	0	0	1	2	0	0.038888	16	10.5		32	21	16	10.5
1	0	37713348	44132567	0			1					2126		14.2	1	1	0	1	0	1	1	5	3	1.6667	0.5	1	1	1	0	0	0	0	0	0	0	1	1	2	0.065623	54	21	27	54	21	54	21
	0	37713348	44132567	0	1		0	0	0	0	1	2152	2152.49	44	0	0	1	1	0	1	1	5	3	1.6667	0.48936	1	1	0	1	1	0	0	1	0	0	0	1	1	0.065623	54	15	54	54	15	54	15
0	0	17316681	44132567	1	1	1	0	1	0	1	0	557	558.444	33	0	0	1	0	0	1	1	3	2	1.5	0.61	1	1	0	0	0	0	0	0	0	0	1	2	0	0.038888	16	10.5		32	21	16	10.5
1	0	17316681	44132567	1	1	1	0	0	0	0	1	967	967.422	7.6	1	1	0	1	0	1	1	4	2	2	0.52128	1	1	1	0	0	0	0	0	0	0	1	1	2	0.065623	54	21	27	54	21	54	21
	0	17316681	44132567	1	1	1	0	0	0	0	1	1345	1345.48	44	0	0	1	1	0	1	1	3	2	1.5	0.58511	1	1	0	1	1	0	0	1	0	0	0	1	1	0.065623	54	15	54	54	15	54	15
0	0	41333118	44132567	0	1	1	0	1	0	1	0	276	276.529	33	1	0	0	1	0	1	1	7	4	1.75	0.35	1	1	0	0	0	0	0	0	0	0	1	2	0	0.038888	16	10.5		32	21	16	10.5
1	0	41333118	44132567	0	0	1	1	0	0	1	0	686	686.322	7.6	1	1	0	1	0	1	1	7	3	2.3333	0.35106	1	1	1	0	0	0	0	0	0	0	1	1	2	0.065623	54	21	27	54	21	54	21
	0	41333118	44132567	0	0	1	1	0	0	1	0	1059	1059.55	49.1	0	0	1	1	0	1	1	8	4	2	0.3617	1	1	0	1	1	0	0	1	0	0	0	1	1	0.065623	54	15	54	54	15	54	15
1	0	41333118	44132567	0	1		1	0	0	0	1		1667.32		1	1	0	1	0	1	1	7	3	2.3333	0.35106	1	1	1	0	0	0	0	0	0	0	1	1	2	0.065623	54	21	27	54	21	54	21
	0	41333118	44132567	0	0		1	0	0	0	1	2040	2040.56	49.1	0	0	1	1	0	1	1	8	4	2	0.3617	1	1	0	1	1	0	0	1	0	0	0	1	1	0.065623	54	15	54	54	15	54	15
	0	37325872	51521281	1	1		0	0	0	0	1		1116.5		1	0	1	1	1	1	1	4	1	4	0.46809	1	1	0	0	0	0	0	0	0	0	0	1	5	0.13023	29	8	5.8	29	8	29	8
0	0	38752746	51521281	0	1	1	1	0	0	1	0	673	728.379	143.1	1	0	0	1	0	1	1	6	3	2	0.5	1	1	0	0	0	0	0	0	0	0	0	2	2	0.076343	8.5	4.5	8.5	17	9	8.5	4.5
1	0	38752746	51521281	0	1	1	1	0	0	0	1	1099	1099.71	16.8	1	0	0	1	1	1	1	7	2	3.5	0.41489	1	1	0	0	1	0	0	1	0	0	0	2	4	0.11676	13	4.5	6.5	26	9	13	4.5
	0	38752746	51521281	0	1	1	1	0	0	0	1	1491	1855.33	44	1	0	1	1	0	1	1	6	3	2	0.46809	1	1	0	0	0	0	0	0	0	0	0	1	5	0.13023	29	8	5.8	29	8	29	8
0	0	38752746	51521281	0	1	1	1	0	0	0	1	1320	1375.38	143.1	1	0	0	1	0	1	1	6	3	2	0.5	1	1	0	0	0	0	0	0	0	0	0	2	2	0.076343	8.5	4.5	8.5	17	9	8.5	4.5
1	0	38752746	51521281	0	1	1	1	0	0	0	1		1747.38		1	0	0	1	1	1	1	7	2	3.5	0.41489	1	1	0	0	1	0	0	1	0	0	0	2	4	0.11676	13	4.5	6.5	26	9	13	4.5
	0	38752746	51521281	0	1	1	1	0	0	0	1		2502.33		1	0	1	1	0	1	1	6	3	2	0.46809	1	1	0	0	0	0	0	0	0	0	0	1	5	0.13023	29	8	5.8	29	8	29	8
0	0	58343568	51521281	0	1	1	1	0	0	0	1	1364	1421.51	143.1	1	0	0	1	0	1	1	5	2	2.5	0.49	1	1	0	0	0	0	0	0	0	0	0	2	2	0.076343	8.5	4.5	8.5	17	9	8.5	4.5
1	0	58343568	51521281	0	0	1	1	0	0	0	1	1790	1791.39	16.8	1	0	0	1	0	1	1	5	2	2.5	0.45745	1	1	0	0	1	0	0	1	0	0	0	2	4	0.11676	13	4.5	6.5	26	9	13	4.5
	0	58343568	51521281	0	1	1	0	0	0	0	1		2546.34		1	0	1	1	0	1	1	5	2	2.5	0.45745	1	1	0	0	0	0	0	0	0	0	0	1	5	0.13023	29	8	5.8	29	8	29	8
	0	23267612	51521281											44	1	0	1	1	1	1	1	4	1	4	0.40426	1	1	0	0	0	0	0	0	0	0	0	1	5	0.13023	29	8	5.8	29	8	29	8
0	0	24487157	76265472	1	0	1	0	1	0	1	0	193	280.545	143.1					1	1	1	16	3	5.3333	0.39362	0	1	0	0	0	0	0	0	0	0	0	1	1	0.039841	12	5	12	12	5	12	5
1	0	24487157	76265472	1	1	1	1	0	0	0	1	621	621.506	6.9	0	0	0	1	1	1	1	16	3	5.3333	0.39362	1	1	0	1	0	0	0	0	0	0	0	1	3	0.086323	26	4	8.6667	26	4	26	4
	0	24487157	76265472	1	1	1	0	0	0	0	1	1005	1008.37	49.1	0	0	0	1	1	1	1	15	3	5	0.3617	1	1	0	0	1	0	0	1	0	0	1	1	2	0.073043	22	4	11	22	4	22	4
0	0	24487157	76265472	0	0	1	0	0	0	1	0	468	555.554	143.1					1	1	1	16	3	5.3333	0.39362	0	1	0	0	0	0	0	0	0	0	0	1	1	0.039841	12	5	12	12	5	12	5
1	0	24487157	76265472	0	1	1	0	0	0	0	1	896	896.51	6.9	0	0	0	1	1	1	1	16	3	5.3333	0.39362	1	1	0	1	0	0	0	0	0	0	0	1	3	0.086323	26	4	8.6667	26	4	26	4
	0	24487157	76265472	0	1	1	0	0	0	0	1	1281	1283.38	49.1	0	0	0	1	1	1	1	15	3	5	0.3617	1	1	0	0	1	0	0	1	0	0	1	1	2	0.073043	22	4	11	22	4	22	4
0	0	24487157	76265472	0	0	1	0	0	0	1	0	899	986.556	143.1					1	1	1	16	3	5.3333	0.39362	0	1	0	0	0	0	0	0	0	0	0	1	1	0.039841	12	5	12	12	5	12	5
1	0	24487157	76265472	0	0	1	1	0	0	0	1	1628	1345.46	191.7	0	0	0	1	1	1	1	16	3	5.3333	0.39362	1	1	0	1	0	0	0	0	0	0	0	1	3	0.086323	26	4	8.6667	26	4	26	4
	0	24487157	76265472	0	0	1	0	0	0	0	1	1849	1714.38	42.2	0	0	0	1	1	1	1	15	3	5	0.3617	1	1	0	0	1	0	0	1	0	0	1	1	2	0.073043	22	4	11	22	4	22	4
0	0	34365632	76265472	1	1	1	0	1	0	1	0	288	375.558	143.1					0	1	0	4	2	2	0.25532	0	1	0	0	0	0	0	0	0	0	0	1	1	0.039841	12	5	12	12	5	12	5
0	0	33133572	47348578	1										143.1	1	0	1	1	0	1	1	5	3	1.6667	0.35	1	1	0	0	1	0	0	1	0	0	0	1	5	0.035713	19	11	3.8	19	11	19	11
0	0	33133572	47348578	0	0	1	0	0	0	1	0	1015	1103.5	143.1	1	0	1	1	0	1	1	5	3	1.6667	0.35	1	1	0	0	1	0	0	1	0	0	0	1	5	0.035713	19	11	3.8	19	11	19	11
1	0	33133572	47348578	0	0	1	0	0	0	0	1	1443	1441.5	6.9	1	0	1	1	1	1	1	5	1	5	0.3617	0	1	0	0	1	0	0	1	0	0	0	1	2	0.041351	22	11	11	22	11	22	11
	0	33133572	47348578	0	0	1	0	0	0	0	1	1832	1848.55	44	0	0	1	1	0	1	1	4	2	2	0.32979	1	1	0	0	1	0	0	1	0	0	0	1	5	0.062027	33	10	6.6	33	10	33	10
	0	24733581	47348578	0	0		0	0	0	0	1	831	839.341	44	0	0	1	1	0	1	1	7	4	1.75	0.41489	1	1	0	0	1	0	0	1	0	0	0	1	5	0.062027	33	10	6.6	33	10	33	10
0	0	51435624	47348578											143.1	1	0	1	1	0	1	1	7	3	2.3333	0.5	1	1	0	0	1	0	0	1	0	0	0	1	5	0.035713	19	11	3.8	19	11	19	11
1	0	51435624	47348578											16.8	1	0	1	1	0	1	1	6	3	2	0.37234	0	1	0	0	1	0	0	1	0	0	0	1	2	0.041351	22	11	11	22	11	22	11
0	0	51435624	47348578	0	0	1	0	0	0	0	1	1188	1276.51	143.1	1	0	1	1	0	1	1	7	3	2.3333	0.5	1	1	0	0	1	0	0	1	0	0	0	1	5	0.035713	19	11	3.8	19	11	19	11
1	0	51435624	47348578	0		1	0				0	1614	1977.63	16.8	1	0	1	1	0	1	1	6	3	2	0.37234	0	1	0	0	1	0	0	1	0	0	0	1	2	0.041351	22	11	11	22	11	22	11
1	0	51435624	47348578	1	1		0	0	0	0	1	623	625.472	7.6	1	0	1	1	0	1	1	6	3	2	0.37234	0	1	0	0	1	0	0	1	0	0	0	1	2	0.041351	22	11	11	22	11	22	11
1	0	51435624	47348578	0	0		0	0	0	0	1	841	843.499	7.6	1	0	1	1	0	1	1	6	3	2	0.37234	0	1	0	0	1	0	0	1	0	0	0	1	2	0.041351	22	11	11	22	11	22	11
0	0	85761621	36423468	1	1	1	1	0	0	0	1	551	549.586	70.1	1	0	1	1	0	1	1	3	2	1.5	0.63	1	1	0	1	1	0	0	1	0	1	1	1	3	0.045069	19	9	6.3333	19	9	19	9
1	0	85761621	36423468	1	0	1	1	0	0	0	1	947	946.519	35	1	0	0	1	0	1	1	3	2	1.5	0.60638	1	1	0	1	0	0	0	0	0	0	0	1	3	0.040325	17	10	5.6667	17	10	17	10
	0	11852762	15428456												0	0	0						1			1	1	0	0	1	0	0	1	0	0	0	1	0	0.078744	24	7		24	7	24	7
0	0	63627768	15428456	1	1	1	1	0	0	0	1		1032.47		1	0	0	1	0	1	1	6	3	2	0.47	1	1	0	1	1	0	0	1	0	0	1	1	1	0.055777	17	7	17	17	7	17	7
1	0	63627768	15428456	1	0	1	1	0	0	0	1	1469	1789.53	56.4	0	0	1	0	0	1	1	6	3	2	0.46809	1	1	0	1	1	0	0	1	0	0	0	1	1	0.059058	18	7	18	18	7	18	7
	0	63627768	15428456	1	1	1	1	0	0	0	1	1818	1818.59	44	0	0	0	0	0	1	1	6	2	3	0.46809	1	1	0	0	1	0	0	1	0	0	0	1	0	0.078744	24	7		24	7	24	7
0	0	63576382	15428456	1	0	1	1	0	0	0	1		1174.45		1	0	0	1	0	1	1	6	3	2	0.43	1	1	0	1	1	0	0	1	0	0	1	1	1	0.055777	17	7	17	17	7	17	7
1	0	63576382	15428456	1	0	1	1	0	0	0	1	1571	1572.44	6.9	0	0	1	1	1	1	1	8	2	4	0.34043	1	1	0	1	1	0	0	1	0	0	0	1	1	0.059058	18	7	18	18	7	18	7
	0	63576382	15428456	1		1	1					2094		42.2	0	0	0	1	1	1	1	8	2	4	0.34043	1	1	0	0	1	0	0	1	0	0	0	1	0	0.078744	24	7		24	7	24	7
0	0	87774653	15428456	1	1	1	0	0	0	1	0		821.436		1	0	0	1	0	1	1	4	2	2	0.55	1	1	0	1	1	0	0	1	0	0	1	1	1	0.055777	17	7	17	17	7	17	7
1	0	87774653	15428456	1	1	1	0	0	0	0	1		1579.46		0	0	1	1	0	1	1	5	2	2.5	0.43617	1	1	0	1	1	0	0	1	0	0	0	1	1	0.059058	18	7	18	18	7	18	7
	0	87774653	15428456	1	1	1	1	0	0	0	1	1741	1616.5	42.2	0	0	0	0	1	1	1	5	1	5	0.43617	1	1	0	0	1	0	0	1	0	0	0	1	0	0.078744	24	7		24	7	24	7
1	0	87774653	15428456	0	1		0	1	0	1	0		534.619		0	0	1	1	0	1	1	5	2	2.5	0.43617	1	1	0	1	1	0	0	1	0	0	0	1	1	0.059058	18	7	18	18	7	18	7
	0	87774653	15428456	0	1		1	0	0	1	0	563	571.505	44	0	0	0	0	1	1	1	5	1	5	0.43617	1	1	0	0	1	0	0	1	0	0	0	1	0	0.078744	24	7		24	7	24	7
0	0	82121681	23487665	1	1	1	0	1	1	1	0	173	173.455	2.3	1	0	0	1	0	1	0	13	5	2.6	0.29	0	1	0	0	1	0	0	1	0	0	1	1	3	0.047589	11	4	3.6667	11	4	11	4
1	0	82121681	23487665	1		1	0				0	573	563.39	13.7	0	0	0	1	0	1	1	7	5	1.4	0.41489	0	1	0	1	0	0	0	0	0	0	1	2	1	0.12114	14	2	28	28	4	14	2
0	0	82121681	23487665	1	0	1	1	0	0	1	0	865	865.461	2.3	1	0	0	1	0	1	0	13	5	2.6	0.29	0	1	0	0	1	0	0	1	0	0	1	1	3	0.047589	11	4	3.6667	11	4	11	4
1	0	82121681	23487665	1		1	1					1554		191.7	0	0	0	1	0	1	1	7	5	1.4	0.41489	0	1	0	1	0	0	0	0	0	0	1	2	1	0.12114	14	2	28	28	4	14	2
	0	82121681	23487665	1		1	1					1636		49.1	0	0	1	1	1	1	1	11	3	3.6667	0.39362	0	1	0	0	1	0	1	1	0	0	0	1	3	0.073547	17	4	5.6667	17	4	17	4
0	0	82121681	23487665	1	1	1	0	0	0	1	0	863	863.467	2.3	1	0	0	1	0	1	0	13	5	2.6	0.29	0	1	0	0	1	0	0	1	0	0	1	1	3	0.047589	11	4	3.6667	11	4	11	4
	0	32362152	23487665											41.2	0	0	1	1	0	1	1	7	3	2.3333	0.41489	0	1	0	0	1	0	1	1	0	0	0	1	3	0.073547	17	4	5.6667	17	4	17	4
0	0	13648664	42658584	0	1	1	0	1	0	1	0		263.568		0	0	1	1	0	1	1	4	2	2	0.52	1	1	0	1	0	0	0	0	0	1	1	1	1	0.064503	16	5	16	16	5	16	5
1	0	13648664	42658584	0	1	1	0	1	0	1	0	457	459.33	54.4	0	0	0	1	0	1	1	4	2	2	0.46809	0	1	0	0	0	0	0	0	0	0	1	1	1	0.088691	22	6	22	22	6	22	6
0	0	13648664	42658584	0	1	1	0	0	0	0	1		1321.57		0	0	1	1	0	1	1	4	2	2	0.52	1	1	0	1	0	0	0	0	0	1	1	1	1	0.064503	16	5	16	16	5	16	5
1	0	13648664	42658584	0	1	1	0	0	0	0	1	1515	1517.34	54.4	0	0	0	1	0	1	1	4	2	2	0.46809	0	1	0	0	0	0	0	0	0	0	1	1	1	0.088691	22	6	22	22	6	22	6
0	0	37651835	42658584	0	1	1	1	0	0	0	1	1130	1130.59	25.4	1	0	0	1	0	1	1	3	2	1.5	0.63	1	1	0	1	0	0	0	0	0	1	1	1	1	0.064503	16	5	16	16	5	16	5
	0	37651835	42658584	0	1	1	1	0	0	0	1	1744	1745.02	55	1	0	0	1	0	1	1	3	2	1.5	0.55319	0	1	0	0	1	1	0	1	0	0	1	1	1	0.068534	17	5	17	17	5	17	5
0	0	75234256	61572288	1	0	1	0	0	0	1	0	1038	1038.63	83	1	0	1	1	0	1	1	6	3	2	0.37	0	1	0	0	0	0	0	0	0	0	0	1	1	0.044346	9	3	9	9	3	9	3
1	0	75234256	61572288	1	0	1	1	0	0	0	1	1518	1517.4	60.5	0	0	0	1	0	1	0	4	2	2	0.34043	0	1	0	0	1	0	0	1	0	0	1	1	2	0.029564	6	3	3	6	3	6	3
	0	75234256	61572288	1	0	1	0	0	0	0	1	1786	1787.41	2	1	0	1	1	0	1	0	4	3	1.3333	0.40426	0	1	0	0	0	0	0	0	0	0	0	1	2	0.034491	7	3	3.5	7	3	7	3
0	0	13481332	34855421	0	0	1	1	0	0	0	1		975.355		1	1	1	1	0	1	1	3	2	1.5	0.63	1	1	0	0	1	0	1	1	0	0	1	1	1	0.027523	13	10	13	13	10	13	10
0	0	85335167	34855421	0	1	1	1	0	0	1	0	691	690.352	2.3	1	1	1	1	0	1	1	4	2	2	0.58	1	1	0	0	1	0	1	1	0	0	1	1	1	0.027523	13	10	13	13	10	13	10
1	0	85335167	34855421	0	1	1	0	0	0	0	1	1114	1439.94	56.4	1	1	0	1	0	1	1	5	2	2.5	0.45745	1	1	0	1	0	0	0	0	0	0	1	1	1	0.038108	18	7	18	18	7	18	7
	0	85335167	34855421	0	1	1	0	0	0	0	1		1463.51		0	0	1	1	0	1	1	6	2	3	0.43617	1	1	0	0	1	0	0	1	0	0	0	1	1	0.076216	36	9	36	36	9	36	9
1	0	85335167	34855421	0	1		0	0	0	0	1	206	565.945	2.8	1	1	0	1	0	1	1	5	2	2.5	0.45745	1	1	0	1	0	0	0	0	0	0	1	1	1	0.038108	18	7	18	18	7	18	7
	0	85335167	34855421	0	1		0	0	0	1	0	585	589.521	41.2	0	0	1	1	0	1	1	6	2	3	0.43617	1	1	0	0	1	0	0	1	0	0	0	1	1	0.076216	36	9	36	36	9	36	9
	0	58614147	34855421	0	1		0	0	0	0	1	581	947.596	41.2	0	0	1									1	1	0	0	1	0	0	1	0	0	0	1	1	0.076216	36	9	36	36	9	36	9
	0	48556582	34855421	0	1		0	0	0	0	1	1000	1004.58	41.2	0	0	1	1	0	1	1	3	2	1.5	0.60638	1	1	0	0	1	0	0	1	0	0	0	1	1	0.076216	36	9	36	36	9	36	9
1	0	76621772	58467264											2.5	1	0	1	1	1	1	1	10	3	3.3333	0.37234	1	1	0	0	0	0	0	0	0	0	0	1	1	0.028235	10	3	10	10	3	10	3
0	0	65536185	58467264	0	1	1	1	0	0	1	0	739	739.434	2.3	1	0	1	0	1	1	1	4	1	4	0.53		1			0	0	0	0	0		0	1		0.033882	12	5		12	5	12	5
0	0	78613584	36121833	1	1	1	1	0	0	1	0		817.466		1	0	0	1	0	1	1	8	5	1.6	0.43	0	1	0	1	1	0	0	1	0	0	0	1	1	0.04224	13	4	13	13	4	13	4
1	0	78613584	36121833	1	1	1	1	0	0	0	1	1190	1189.57	0	0	0	0	1	0	1	1	9	5	1.8	0.39362	0	1	1	1	1	1	0	1	0	0	0	1	1	0.048738	15	3	15	15	3	15	3
	0	78613584	36121833	1	1	1	0	0	0	0	1	1561	1562.49	2	1	0	0	1	0	1	1	10	5	2	0.39362	0	1	0	1	1	0	0	1	1	0	0	1	1	0.051987	16	3	16	16	3	16	3
0	0	33113646	85258214	1	0	1	0	0	0	0	1	1186	1188.4	63.3	1	0	0	1	0	1	1	3	2	1.5	0.6	1	1	0	0	0	0	0	0	0	0	1	1	1	0.054201	14	6	14	14	6	14	6
1	0	33113646	85258214	1	1	1	0	0	0	0	1	1631	1587.53	47.2	0	0	0	1	0	1	1	3	2	1.5	0.58511	1	1	1	0	0	0	0	0	0	0	1	1	1	0.05033	13	6	13	13	6	13	6
	0	33113646	85258214	1		1	0					1995		55	0	0	1	1	0	1	1	4	2	2	0.52128	1	1	0	0	1	0	0	1	0	0	1	1	1	0.030972	8	4	8	8	4	8	4
1	0	47262588	85258214	1	1		1	0	0	0	1	1022	979.451	47.2	0	0	0	1	0	1	1	3	1	3	0.58511	1	1	1	0	0	0	0	0	0	0	1	1	1	0.05033	13	6	13	13	6	13	6
0	0	21455421	73855752	1	1	1	1	0	0	1	0	771	772.416	2.3	1	0	1	1	0	1	0	6	2	3	0.4	1	1	0	1	0	0	0	0	0	0	0	2	1	0.044471	5.5	1.5	11	11	3	5.5	1.5
0	0	37743812	73855752	1	1	1	1	1	0	1	0	427	453.407	63.3	1	0	0	1	0	1	0	6	3	2	0.4	1	1	0	1	0	0	0	0	0	0	0	2	1	0.044471	5.5	1.5	11	11	3	5.5	1.5
	0	12515524	21555838	0	1		1	1	0	1	0	185	193.419	55	1	0	0	0	1	1	0	4	1	4	0.41489	0	1	0	0	0	0	0	0	0	0	0	2	0	0.030749	4	1.5		8	3	4	1.5
	0	12515524	21555838	1	1		1	0	0	0	0	694	708.378	44	1	0	0	0	1	1	0	4	1	4	0.41489	0	1	0	0	0	0	0	0	0	0	0	2	0	0.030749	4	1.5		8	3	4	1.5
0	0	47113157	56226425	1	0	1	1	0	0	1	0		1635		1	0	0	1	0	1	1	5	3	1.6667	0.39	1	1	0	1	1	0	0	1	0	1	1	2	2	0.042948	4.5	2.5	4.5	9	5	4.5	2.5
1	0	47113157	56226425	1	1	1	0	0	0	0	1		2035.37		1	0	0	1	0	1	1	4	2	2	0.32979	0	1	0	1	1	0	0	1	0	0	1	1	1	0.052492	11	5	11	11	5	11	5
1	0	72313286	56226425	1	1		1	1	1	1	1		95.3091		1	0	0	1	0	1	1	3	2	1.5	0.57447	0	1	0	1	1	0	0	1	0	0	1	1	1	0.052492	11	5	11	11	5	11	5
	0	72313286	56226425	1			1					638		30.5	1	0	1	0	0	1	1	3	1	3	0.58511	0	1	0	1	1	0	0	1	0	0	1	1	0	0.042948	9	4		9	4	9	4
0	0	67232427	84328437	1	0	1	1	0	0	1	0	661	660	64.3	1	0	0	0	0	1	0	3	2	1.5	0.42		1			0	0	0	0	0		0	1		0.090101	11	4		11	4	11	4
1	0	67232427	84328437	1	1	1	1	0	0	0	1	1062	1061.41	29.3	0	0	0	0	0	1	0	4	2	2	0.41489	0	1	1	0	1	1	0	1	0	0	0	1	0	0.08191	10	3		10	3	10	3
	0	67232427	84328437	0	1		1	0	0	1	0	451	465.408	44	0	0	0	0	0	1	0	3	2	1.5	0.37234	0	1	0	1	1	1	0	1	0	0	0	1	0	0.040955	5	3		5	3	5	3
0	0	46355348	84328437	0	1	1	0	1	0	1	0	172	171	64.3	1	0	0	0	0	1	0	3	2	1.5	0.42		1			0	0	0	0	0		0	1		0.090101	11	4		11	4	11	4
1	0	46355348	84328437	0	1	1	1	0	0	0	1	573	572.377	29.3	0	0	0	0	0	0	0	4	2	2	0.30851	0	1	1	0	1	1	0	1	0	0	0	1	0	0.08191	10	3		10	3	10	3
0	0	46355348	84328437	1	1	1	0	0	0	0	0	933	932	64.3	1	0	0	0	0	1	0	3	2	1.5	0.42		1			0	0	0	0	0		0	1		0.090101	11	4		11	4	11	4
1	0	46355348	84328437	1	1	1	1	0	0	0	1	1333	1333.38	29.3	0	0	0	0	0	0	0	4	2	2	0.30851	0	1	1	0	1	1	0	1	0	0	0	1	0	0.08191	10	3		10	3	10	3
0	0	76461167	62216325	0	1	1	1	1	0	1	0	103	103	64.3	0	0	1	0	0	0	1	3	2	1.5	0.39	0	0	0	1	0	0	0	0	0	1	1	1	0	0.040721	5	2		5	2	5	2
0	0	58362551	67743124	1	1	1	1	1	0	1	0	317	386.461	63.3	1	0	0	1	1	1	1	16	5	3.2	0.33	1	1	0	0	1	0	0	1	0	0	1	1	1	0.057458	20	2	20	20	2	20	2
1	0	58362551	67743124	1	1	1	1	0	0	1	0	719	718.425	29.3	0	0	0	1	1	1	1	16	5	3.2	0.39362	1	1	1	0	1	0	1	1	0	1	1	1	1	0.057458	20	2	20	20	2	20	2
	0	58362551	67743124	1		1	1					1118		44	0	0	1	1	0	1	1	13	5	2.6	0.39362	1	1	0	0	0	0	0	0	0	0	0	1	1	0.045967	16	2	16	16	2	16	2
0	0	58362551	67743124	0	1	1	1	0	0	1	0	1225	1294.46	63.3	1	0	0	1	1	1	1	16	5	3.2	0.33	1	1	0	0	1	0	0	1	0	0	1	1	1	0.057458	20	2	20	20	2	20	2
1	0	58362551	67743124	0	1	1	1	0	0	0	1		1626.43		0	0	0	1	1	1	1	16	5	3.2	0.39362	1	1	1	0	1	0	1	1	0	1	1	1	1	0.057458	20	2	20	20	2	20	2
	0	58362551	67743124	0	1	1	0	0	0	0	1	2027	2041.58	44	0	0	1	1	0	1	1	13	5	2.6	0.39362	1	1	0	0	0	0	0	0	0	0	0	1	1	0.045967	16	2	16	16	2	16	2
1	0	58362551	67743124	0	1		1	0	0	1	0	248	248.332	29.3	0	0	0	1	1	1	1	16	5	3.2	0.39362	1	1	1	0	1	0	1	1	0	1	1	1	1	0.057458	20	2	20	20	2	20	2
	0	58362551	67743124	0			1					647		44	0	0	1	1	0	1	1	13	5	2.6	0.39362	1	1	0	0	0	0	0	0	0	0	0	1	1	0.045967	16	2	16	16	2	16	2
0	0	61745435	67743124	0	0	1	0	0	0	1	0	557	626.467	63.3	1	0	0	1	0	1	1	4	3	1.3333	0.55	1	1	0	0	1	0	0	1	0	0	1	1	1	0.057458	20	2	20	20	2	20	2
1	0	61745435	67743124	0	1	1	0	0	0	0	1	959	958.419	29.3	0	0	0	1	0	1	1	4	3	1.3333	0.52128	1	1	1	0	1	0	1	1	0	1	1	1	1	0.057458	20	2	20	20	2	20	2
	0	61745435	67743124	0	1	1	0	0	0	0	1		1373.56		0	0	1	1	0	1	1	3	2	1.5	0.57447	1	1	0	0	0	0	0	0	0	0	0	1	1	0.045967	16	2	16	16	2	16	2
	0	68282433	25574127	1	0		0	1	0	1	0	289	290.854	41.2	0	0	0	1	0	1	1	5	2	2.5	0.35106	0	1	1	1	1	0	1	1	0	0	0	1	1	0.074468	18	5	18	18	5	18	5
1	0	62737188	25574127											2.5	0	0	0	0	0	0	0	3	1	3	0.29787	0	1	0	0	0	0	0	0	0	0	0	1	0	0.053782	13	4		13	4	13	4
	0	14861873	25574127	0	1		0	1	0	1	0	204	205.847	41.2	0	0	0	1	0	1	0	6	2	3	0.24468	0	1	1	1	1	0	1	1	0	0	0	1	1	0.074468	18	5	18	18	5	18	5
	0	14861873	25574127	1	1		0	1	0	1	0	204	205.851	41.2	0	0	0	1	0	1	0	6	2	3	0.24468	0	1	1	1	1	0	1	1	0	0	0	1	1	0.074468	18	5	18	18	5	18	5
	0	32182263	25574127	0	1		0	0	0	0	1	869	870.864	41.2	0	0	0	1	0	1	1	4	2	2	0.41489	0	1	1	1	1	0	1	1	0	0	0	1	1	0.074468	18	5	18	18	5	18	5
	0	81228888	25574127											49.1	0	0	0	1	0	0	0	3	2	1.5	0.31915	0	1	1	1	1	0	1	1	0	0	0	1	1	0.074468	18	5	18	18	5	18	5
	0	44557283	71575662	0	1		0	1	0	1	0	339	338.329	44	1	0	1	1	0	1	0	6	2	3	0.34043	0	1	0	1	1	0	0	1	0	0	1	1	1	0.064176	12	2	12	12	2	12	2
0	0	77663255	71575662	0	1	1	1	1	1	1	0	57	45.5444	33	1	0	1	1	0	0	0	4	3	1.3333	0.34	0	0	0	1	0	0	0	0	0	1	1	1	1	0.074873	14	3	14	14	3	14	3
0	0	48588231	87547718	0	1	1	1	0	0	1	0	750	750.594	63.3	1	0	1	1	0	1	1	3	2	1.5	0.6	0	1	0	0	1	0	0	1	0	0	0	1	1	0.070007	11	4	11	11	4	11	4
	0	53882763	68182278	0	1		1	0	0	0	1	1542	1542.59	44	1	0	1	1	1	1	1	7	2	3.5	0.41489	1	1	0	0	1	0	0	1	0	0	0	1	1	0.071607	13	3	13	13	3	13	3
1	0	53882763	68182278	0	1		1	0	0	0	1	1159	1158.35	2.8	0	0	1	1	0	1	1	4	3	1.3333	0.53191	1	1	0	0	0	0	0	0	0	0	0	1	1	0.044066	8	3	8	8	3	8	3
1	0	18534481	68182278	0	1		1	1	0	1	1	323	323.348	2.8	0	0	1	1	0	1	1	3	3	1	0.6383	1	1	0	0	0	0	0	0	0	0	0	1	1	0.044066	8	3	8	8	3	8	3
	0	18534481	68182278	0	1		1	0	0	0	1	703	706.607	49.1	1	0	1	1	0	1	1	5	3	1.6667	0.48936	1	1	0	0	1	0	0	1	0	0	0	1	1	0.071607	13	3	13	13	3	13	3
0	0	22438413	31461341	1	0	1	0	0	0	1	0	354	354.421	2.3	1	1	1	1	0	1	1	3	3	1	0.63	0	1	0	1	1	0	0	1	0	0	0	2	1	0.030099	5.5	1.5	11	11	3	5.5	1.5
1	0	22438413	31461341	1	0	1	1	0	0	0	1	752	760.957	7.6	0	0	0	1	1	1	1	8	2	4	0.3617	0	1	0	0	1	0	0	1	0	0	1	2	1	0.038308	7	1	14	14	2	7	1
	0	22438413	31461341	1	0	1	1	0	0	0	1	1125	1124.41	49.1	0	0	1	1	1	1	1	9	2	4.5	0.35106	0	1	0	0	1	0	0	1	0	0	0	1	1	0.049253	18	3	18	18	3	18	3
0	0	22438413	31461341	0	0	0	0	0	0	0	1	1063	1063.43	2.3	1	1	1	1	0	1	1	3	3	1	0.63	0	1	0	1	1	0	0	1	0	0	0	2	1	0.030099	5.5	1.5	11	11	3	5.5	1.5
1	0	22438413	31461341	0	0	0	1	0	0	0	1	1460	1458.33	7.6	0	0	0	1	1	1	1	8	2	4	0.3617	0	1	0	0	1	0	0	1	0	0	1	2	1	0.038308	7	1	14	14	2	7	1
	0	22438413	31461341	0	0	0	1	0	0	0	1	1853	1833.41	55	0	0	1	1	1	1	1	9	2	4.5	0.35106	0	1	0	0	1	0	0	1	0	0	0	1	1	0.049253	18	3	18	18	3	18	3
0	0	45516788	31461341	0	1	1	1	0	0	1	0	929	929.679	2.3	1	0	1	0	0	1	1	5	3	1.6667	0.52	0	1	0	1	1	0	0	1	0	0	0	2	1	0.030099	5.5	1.5	11	11	3	5.5	1.5
0	0	55465814	47517541	1	0	0	1	0	0	0	1		1170.45		1	0	1	0	0	1	1	5	3	1.6667	0.49	0	1	0	1	0	0	0	0	0	0	1	1	0	0.064275	10	3		10	3	10	3
0	0	22328612	45118715	1	0	1	0	0	0	1	0	738	738	63.3					0	1	1	12	5	2.4	0.39362	1	1	0	1	0	0	0	0	0	1	1	1	2	0.059735	20	6	10	20	6	20	6
	0	22328612	45118715	1	1	1	1	0	0	0	1	1667	1548.88	35.1	0	0	0	1	0	1	1	13	5	2.6	0.39362	1	1	1	1	1	1	0	1	0	1	1	2	2	0.083629	14	2.5	14	28	5	14	2.5
0	0	22328612	45118715	1	1	1	1	0	0	1	0	1228	1228	63.3					0	1	1	12	5	2.4	0.39362	1	1	0	1	0	0	0	0	0	1	1	1	2	0.059735	20	6	10	20	6	20	6
1	0	22328612	45118715	1	0	1	0	0	0	0	1	1630	1993.98	29.3	0	1	0	1	0	1	1	12	5	2.4	0.39362	1	1	1	1	1	0	0	1	0	0	1	1	2	0.056748	19	5	9.5	19	5	19	5
	0	22328612	45118715	1		1	0						2394.42		0	0	0	1	0	1	1	13	5	2.6	0.39362	1	1	1	1	1	1	0	1	0	1	1	2	2	0.083629	14	2.5	14	28	5	14	2.5
1	0	22328612	45118715	0	1		1	0	0	0	0	210	572.984	29.3	0	1	0	1	0	1	1	12	5	2.4	0.39362	1	1	1	1	1	0	0	1	0	0	1	1	2	0.056748	19	5	9.5	19	5	19	5
	0	22328612	45118715	0	1		1	0	0	0	1	736	617.886	35.1	0	0	0	1	0	1	1	13	5	2.6	0.39362	1	1	1	1	1	1	0	1	0	1	1	2	2	0.083629	14	2.5	14	28	5	14	2.5
1	0	22328612	45118715	1										29.3	0	1	0	1	0	1	1	12	5	2.4	0.39362	1	1	1	1	1	0	0	1	0	0	1	1	2	0.056748	19	5	9.5	19	5	19	5
	0	22328612	45118715	0	0		1	0	0	0	1	957	838.883	35.1	0	0	0	1	0	1	1	13	5	2.6	0.39362	1	1	1	1	1	1	0	1	0	1	1	2	2	0.083629	14	2.5	14	28	5	14	2.5
0	0	67623577	45118715	0	1		0	0	0	1	0	885	885	63.3	1	0	0	1	1	1	1	6	1	6	0.31	1	1	0	1	0	0	0	0	0	1	1	1	2	0.059735	20	6	10	20	6	20	6
	0	23758466	45118715	0	1		1	0	0	1	0	270	633.395	44	0	0	0	1	1	1	1	9	2	4.5	0.37234	1	1	1	1	1	1	0	1	0	1	1	2	2	0.083629	14	2.5	14	28	5	14	2.5
0	1	72124678	82565766	0	1	1	0	0	0	0	1	855	856.676	83	1	0	1	1	0	1	1	11	6	1.8333	0.43	0	1	0	1	1	0	0	1	0	1	1	1	0	0.063678	17	3		17	3	17	3
1	1	72124678	82565766	0	0	1	0	0	0	1	1	1441	1230.44	114.7	1	1	1	1	0	1	1	9	5	1.8	0.39362	1	1	1	0	1	0	0	1	0	0	1	1	1	0.067424	18	3	18	18	3	18	3
	1	72124678	82565766	0		1	0					1669		31.3	0	1	1	1	0	1	1	12	5	2.4	0.39362	1	1	0	0	1	0	0	1	0	0	1	1	1	0.089898	24	3	24	24	3	24	3
1	1	72124678	82565766	0	0		0	1	0	1	0	271	271.442	0	1	1	1	1	0	1	1	9	5	1.8	0.39362	1	1	1	0	1	0	0	1	0	0	1	1	1	0.067424	18	3	18	18	3	18	3
	1	72124678	82565766	0	1		0	0	0	1	0	631	634.395	0	0	1	1	1	0	1	1	12	5	2.4	0.39362	1	1	0	0	1	0	0	1	0	0	1	1	1	0.089898	24	3	24	24	3	24	3
1	1	72124678	82565766	1	1		0	1	0	1	0	219	220.292	0	1	1	1	1	0	1	1	9	5	1.8	0.39362	1	1	1	0	1	0	0	1	0	0	1	1	1	0.067424	18	3	18	18	3	18	3
	1	72124678	82565766	1	0		0	0	0	0	1	578	581.438	0	0	1	1	1	0	1	1	12	5	2.4	0.39362	1	1	0	0	1	0	0	1	0	0	1	1	1	0.089898	24	3	24	24	3	24	3
0	1	74428134	82565766	0	1	1	1	1	1	1	0	124	168.588	83	1	0	0	1	0	1	1	5	2	2.5	0.35	0	1	0	1	1	0	0	1	0	1	1	1	0	0.063678	17	3		17	3	17	3
1	1	38243626	82565766	1	1		0	1	0	1	0	223	222.483	0	1	1	1	1	0	0	0	7	3	2.3333	0.053191	1	1	1	0	1	0	0	1	0	0	1	1	1	0.067424	18	3	18	18	3	18	3
	1	38243626	82565766	1	1		0	0	0	0	1	582	585.475	0	0	1	1	1	0	1	0	4	4	1	0.32979	1	1	0	0	1	0	0	1	0	0	1	1	1	0.089898	24	3	24	24	3	24	3
0	0	41153333	55367657	0	1	1	1	1	0	1	0		109.575		1	0	0	1	0	1	1	6	5	1.2	0.4	0	1	0	1	0	0	0	0	0	0	0	1	1	0.083057	10	3	10	10	3	10	3
1	0	41153333	55367657	0	0	1	0	0	0	1	0	476	479.501	35	0	0		1	0	1	1	6	2	3	0.40426	0	1	0	1	1	0	0	1	0	0	0	1	1	0.091363	11	2	11	11	2	11	2
	0	41153333	55367657	0		1	0					918		36.4	1	0		1	0	1	1	7	4	1.75	0.38298	0	1	0	1	1	0	0	1	0	0	0	1	1	0.05814	7	1	7	7	1	7	1
0	0	41153333	55367657	0	0	1	1	0	0	1	1		1083.57		1	0	0	1	0	1	1	6	5	1.2	0.4	0	1	0	1	0	0	0	0	0	0	0	1	1	0.083057	10	3	10	10	3	10	3
0	0	51257265	55367657	1	0	1	0	0	0	1	1		1207.59		1	0	0	1	0	1	1	3	2	1.5	0.53	0	1	0	1	0	0	0	0	0	0	0	1	1	0.083057	10	3	10	10	3	10	3
1	0	23821526	44723345	1	1		0	1	0	1	0	317	317.436	16.8	1	0	0	0	1	1	0	7	2	3.5	0.2766	0	1	0	0	1	1	0	0	0	1	1	1	1	0.082758	26	6	26	26	6	26	6
	0	23821526	44723345	1	1		0	0	0	0	1	704	701.905	41.2	0	0	1	0	0	1	1	6	2	3	0.43617	0	1	0	0	1	1	0	1	0	0	1	1	1	0.079575	25	6	25	25	6	25	6
0	0	32646431	44723345	1	0	1	0	0	0	1	0	604	602.511	33	0	0	1	0	0	1	1	7	3	2.3333	0.36	1	1	0	0	1	0	0	1	0	0	1	1	0	0.054111	17	6		17	6	17	6
1	0	32646431	44723345	1		1	0					1298		198.8	1	0	0		0	1	1	7	3	2.3333	0.36	0	1	0	0	1	1	0	0	0	1	1	1	1	0.082758	26	6	26	26	6	26	6
	0	32646431	44723345	1		1	0					1522		42.2	0	0	1		0	1	1	7	3	2.3333	0.36	0	1	0	0	1	1	0	1	0	0	1	1	1	0.079575	25	6	25	25	6	25	6
0	0	84656435	44723345	1	0	1	0	1	0	1	0	313	311.523	33	0	0	1	0	1	1	0	4	1	4	0.32	1	1	0	0	1	0	0	1	0	0	1	1	0	0.054111	17	6		17	6	17	6
1	0	84656435	44723345	1	1	1	0	0	0	0	1	705	706.706	16.8	1	0	0	0	1	1	0	4	1	4	0.34043	0	1	0	0	1	1	0	0	0	1	1	1	1	0.082758	26	6	26	26	6	26	6
	0	84656435	44723345	1	1	1	1	0	0	0	1	1091	1089.87	22.1	0	0	1	0	0	0	0	4	2	2	0.23404	0	1	0	0	1	1	0	1	0	0	1	1	1	0.079575	25	6	25	25	6	25	6
1	0	84656435	44723345	1	1		0	0	0	0	1	323	690.862	16.8	1	0	0	0	1	1	0	4	1	4	0.34043	0	1	0	0	1	1	0	0	0	1	1	1	1	0.082758	26	6	26	26	6	26	6
	0	84656435	44723345	1	1		0	0	0	0	1	710	712.908	41.2	0	0	1	0	0	0	0	4	2	2	0.23404	0	1	0	0	1	1	0	1	0	0	1	1	1	0.079575	25	6	25	25	6	25	6
0	0	25576253	44723345	0	1	1	0	0	0	1	0	1044	1042.53	33	0	0	1	0	0	1	1	4	2	2	0.49	1	1	0	0	1	0	0	1	0	0	1	1	0	0.054111	17	6		17	6	17	6
1	0	25576253	44723345	0	1	1	0	0	0	0	1	1439	1438.3	6.9	1	0	0	0	0	1	1	4	2	2	0.48936	0	1	0	0	1	1	0	0	0	1	1	1	1	0.082758	26	6	26	26	6	26	6
	0	25576253	44723345	0	1	1	0	0	0	0	1	1822	1820.89	22.1	0	0	1	0	0	1	1	5	2	2.5	0.45745	0	1	0	0	1	1	0	1	0	0	1	1	1	0.079575	25	6	25	25	6	25	6
0	0	17364821	64483672	0	0	1	0	1	1	1	0	250	250.48	33	1	1	1	0	0	1	1	8	3	2.6667	0.36	1	1	0	0	1	0	0	1	0	0	1	1	1	0.019472	11	5	11	11	5	11	5
	0	17364821	64483672	0	1		1	1	1	1	0	180	180.577	41.2	1	0	0	1	0	1	1	3	3	1	0.6383	1	1	0	0	1	0	0	1	0	0	0	1	1	0.012391	7	4	7	7	4	7	4
0	0	51858168	64483672	1	1	1	1	1	1	1	0	60	60.4979	33	1	1	1	0	0	1	1	5	3	1.6667	0.52	1	1	0	0	1	0	0	1	0	0	1	1	1	0.019472	11	5	11	11	5	11	5
1	0	51858168	64483672	1		1	1					457		16.8	1	0	0	0	0	1	0	6	2	3	0.3617	1	1	0	0						0	0	1	0	0.019472	11	2		11	2	11	2
	0	51858168	64483672	1	1	1	1	0	0	0	1	844	843.584	49.1	1	0	0	1	0	1	1	4	2	2	0.55319	1	1	0	0	1	0	0	1	0	0	0	1	1	0.012391	7	4	7	7	4	7	4
0	0	31648286	64483672	1	1	1	1	1	1	1	0	176	178.388	33	1	1	1	0	0	1	1	5	2	2.5	0.47	1	1	0	0	1	0	0	1	0	0	1	1	1	0.019472	11	5	11	11	5	11	5
1	0	38452168	27166526	0	0		0	0	0	1	0		157.298	6.9	1	0	1	1	1	1	1	12	3	4	0.39362	0	1	0	0	1	0	0	1	0	0	0	3	4	0.059519	11.3333	3.3333	8.5	34	10	11.3333	3.3333
	0	38452168	27166526	0	1		1	0	0	0	1	181	184.381	44	1	0	1	1	1	1	1	13	4	3.25	0.39362	0	1	0	0	1	0	0	1	0	0	0	1	4	0.068271	39	9	9.75	39	9	39	9
1	0	36443257	27166526	0	1		1	1	1	1	0		118.362		1	0	1	1	0	1	1	3	2	1.5	0.61702	0	1	0	0	1	0	0	1	0	0	0	3	4	0.059519	11.3333	3.3333	8.5	34	10	11.3333	3.3333
	0	36443257	27166526	0	1		1	1	1	1	0	505	508.396	44	1	0	1	1	0	1	1	5	2	2.5	0.48936	0	1	0	0	1	0	0	1	0	0	0	1	4	0.068271	39	9	9.75	39	9	39	9
0	0	35578751	27166526	1	1	1	1	0	0	1	0	905	906.57	33	1	0	1	1	0	1	1	3	3	1	0.63	0	1	0	0	1	0	0	1	0	0	0	2	7	0.026258	7.5	5.5	2.1429	15	11	7.5	5.5
1	0	35578751	27166526	1		1	1					1337		56.4	1	0	1	1	0	1	1	3	3	1	0.63	0	1	0	0	1	0	0	1	0	0	0	3	4	0.059519	11.3333	3.3333	8.5	34	10	11.3333	3.3333
	0	35578751	27166526	1		1	1					1689		44	1	0	1	1	0	1	1	3	2	1.5	0.57447	0	1	0	0	1	0	0	1	0	0	0	1	4	0.068271	39	9	9.75	39	9	39	9
	0	85442318	27166526	1	1		1	1	1	1	0	170	178.442	55	1	0	1	1	1	1	1	4	1	4	0.52128	0	1	0	0	1	0	0	1	0	0	0	1	4	0.068271	39	9	9.75	39	9	39	9
0	0	85461715	25153483	1	0	1	0	1	0	1	0	189	190.427	33	1	0	1	1	0	1	1	5	3	1.6667	0.38	0	1	0	0	0	0	0	0	0	0	0	1	2	0.053329	12	6	6	12	6	12	6
1	0	85461715	25153483	1	0	1	0	0	0	0	0	583	583.314	6.9	0	0	0	1	0	1	1	6	2	3	0.28723	0	1	0	1	1	0	0	1	0	0	0	1	3	0.11555	26	6	8.6667	26	6	26	6
	0	85461715	25153483	1	0	1	0	0	0	0	1	973	970.829	44	0	0	0	1	0	1	1	6	2	3	0.24468	0	1	0	1	1	1	0	1	0	1	0	1	3	0.11999	27	6	9	27	6	27	6
1	0	87268586	25153483	0	1		1	1	0	1	0	425	411.322	13.7	0	0	0	1	0	1	1	6	3	2	0.43617	0	1	0	1	1	0	0	1	0	0	0	1	3	0.11555	26	6	8.6667	26	6	26	6
	0	87268586	25153483	0	1		1	0	0	0	1	800	798.884	44	0	0	0	0	0	1	1	4	3	1.3333	0.55319	0	1	0	1	1	1	0	1	0	1	0	1	3	0.11999	27	6	9	27	6	27	6
0	0	74346245	25153483	0	1	1	1	1	0	1	0	444	444.411	33	1	0	1	1	0	1	1	7	3	2.3333	0.53	0	1	0	0	0	0	0	0	0	0	0	1	2	0.053329	12	6	6	12	6	12	6
1	0	74346245	25153483	0	1	1	1	0	0	0	1	851	1201.84	13.7	0	0	0	1	1	1	1	10	3	3.3333	0.55319	0	1	0	1	1	0	0	1	0	0	0	1	3	0.11555	26	6	8.6667	26	6	26	6
	0	74346245	25153483	0	1	1	1	0	0	0	1	1240	1224.86	55	0	0	0	1	1	1	1	11	3	3.6667	0.39362	0	1	0	1	1	1	0	1	0	1	0	1	3	0.11999	27	6	9	27	6	27	6
	0	74346245	25153483	0	1		0	1	0	1	0	366	364.859	44	0	0	0	1	1	1	1	11	3	3.6667	0.39362	0	1	0	1	1	1	0	1	0	1	0	1	3	0.11999	27	6	9	27	6	27	6
	0	74346245	25153483	1	1		1	1	0	1	0	376	372.867	44	0	0	0	1	1	1	1	11	3	3.6667	0.39362	0	1	0	1	1	1	0	1	0	1	0	1	3	0.11999	27	6	9	27	6	27	6
0	0	15555726	25153483	1	1	1	1	0	0	1	0	612	612.393	33	1	0	1	1	0	1	1	3	2	1.5	0.56	0	1	0	0	0	0	0	0	0	0	0	1	2	0.053329	12	6	6	12	6	12	6
0	0	88236271	65618624	1	1	1	1	0	0	0	1	1074	1070.43	33	1	0	1	1	0	1	1	3	2	1.5	0.63	0	1	0	0	1	0	0	1	0	0	0	2	1	0.060275	7.5	2.5	15	15	5	7.5	2.5
0	0	76854666	65618624	0	1	1	1	0	0	1	0	699	697.446	33	1	0	1	1	0	1	1	6	3	2	0.45	0	1	0	0	1	0	0	1	0	0	0	2	1	0.060275	7.5	2.5	15	15	5	7.5	2.5
	0	76854666	65618624	0	1	1	1	0	0	0	1	1485	1475.85	44	0	0	0	1	0	1	1	6	2	3	0.43617	0	1	1	0	1	1	0	1	0	0	0	1	1	0.04822	12	6	12	12	6	12	6
0	0	53867375	42175284	0	1	1	1	1	0	1	0	70	66.4165	33	1	0	1	1	0	1	1	8	5	1.6	0.36	0	1	0	0	1	0	0	1	0	0	1	1	2	0.020227	7	6	3.5	7	6	7	6
1	0	53867375	42175284	0	0	1	1	0	0	1	0	464	829.302	6.9	0	0	1	1	0	1	1	8	4	2	0.39362	0	1	0	0	1	0	0	1	0	0	0	1	1	0.052012	18	5	18	18	5	18	5
	0	53867375	42175284	0	1	1	1	0	0	0	1	847	845.448	22.1	1	0	0	1	0	1	1	8	4	2	0.39362	1	1	0	0	1	0	0	1	0	0	0	2	2	0.046233	8	2.5	8	16	5	8	2.5
	0	21647235	42175284	0	1		1	1	1	1	0	83	59.4579	55	1	0	0	1	0	1	1	3	2	1.5	0.56383	1	1	0	0	1	0	0	1	0	0	0	2	2	0.046233	8	2.5	8	16	5	8	2.5
0	0	64626528	16454372	0	1	1	0	1	0	1	0	514	511.397	33	1	0	0	0	0	1	1	4	3	1.3333	0.55	0	1	0	1	1	0	0	1	0	0	1	1	1	0.057658	9	6	9	9	6	9	6
1	0	64626528	16454372	0	1	1	0	0	0	0	1		928.463		0	0	0	0	1	1	1	7	2	3.5	0.35106	0	1	1	1	1	0	0	1	0	0	1	1	0	0.18579	29	6		29	6	29	6
	0	64626528	16454372	1	1		0	0	0	0	1	1217	1582.63	49.1	1	0	0	0	0	1	1	2	3	0.66667	0.60638	0	0	0	0	1	0	0	1	0	0	1	2	0	0.10891	8.5	2.5		17	5	8.5	2.5
0	0	46811727	16454372	1	1	1	0	1	1	1	0		164.446		1	0	0	1	0	0	0	3	3	1	0.32	0	1	0	1	1	0	0	1	0	0	1	1	1	0.057658	9	6	9	9	6	9	6
1	0	46811727	16454372	1	1	1	0	0	0	1	0	559	577.466	6.9	0	0	0	1	0	1	0	4	2	2	0.29787	0	1	1	1	1	0	0	1	0	0	1	1	0	0.18579	29	6		29	6	29	6
	0	46811727	16454372	1	0	1	0	0	0	0	1	941	1316.31	22.1	1	0	0	0	1	0	0	7	1	7	0.095745	0	0	0	0	1	0	0	1	0	0	1	2	0	0.10891	8.5	2.5		17	5	8.5	2.5
	0	15866871	16454372	0	1		1	0	0	0	1	509	876.614	22.1	1	0	0	0	0	1	1	4	3	1.3333	0.52128	0	0	0	0	1	0	0	1	0	0	1	2	0	0.10891	8.5	2.5		17	5	8.5	2.5
1	0	64771843	77885652	0	1		1	0	0	0	1	257	620.543	16.8	1	0	1	1	1	1	1	8	2	4	0.39362	0	1	0	0	0	0	0	0	0	0	1	1	1	0.1032	22	8	22	22	8	22	8
	0	64771843	77885652	0	1		1	0	0	1	0	645	641.521	49.1	1	0	1	1	1	1	1	5	1	5	0.42553	1	1	0	0	1	0	0	1	0	0	0	1	1	0.089131	19	7	19	19	7	19	7
0	0	64631167	77885652	0	1	1	1	1	0	1	0		387.392		1	0	1	0	0	1	0	3	2	1.5	0.53	1	1	0	1	0	0	0	0	0	0	1	1	1	0.079748	17	9	17	17	9	17	9
	0	37815584	77885652											42.2	1	0	1									1	1	0	0	1	0	0	1	0	0	0	1	1	0.089131	19	7	19	19	7	19	7
	0	22865266	77885652											42.2	1	0	1									1	1	0	0	1	0	0	1	0	0	0	1	1	0.089131	19	7	19	19	7	19	7
0	0	34821286	88172535	1	1	1	0	0	0	1	0	588	589.383	33	1	1	1	0	0	1	0	3	3	1	0.53	1	1	1	1	1	0	0	1	0	0	1	1	1	0.038109	12	4	12	12	4	12	4
	0	34821286	88172535	0	1		0	0	0	1	0		466.89		1	1	0	0	0	1	0	6	2	3	0.3617	0	1	0	0	1	1	0	1	0	0	0	1	0	0.047636	15	4		15	4	15	4
0	0	18482663	88172535	0	1	1	1	1	0	1	0	209	210.396	33	1	1	1	0	0	1	1	3	3	1	0.6	1	1	1	1	1	0	0	1	0	0	1	1	1	0.038109	12	4	12	12	4	12	4
1	0	18482663	88172535	0		1	1					642		56.4	1	1	0	1	0	1	1	3	3	1	0.6	1	1	0	0	1	1	0	1	0	1	1	1	0	0.063515	20	4		20	4	20	4
	0	18482663	88172535	0	0	1	0	0	0	0	1	993	992.819	44	1	1	0	1	0	1	1	3	3	1	0.53191	0	1	0	0	1	1	0	1	0	0	0	1	0	0.047636	15	4		15	4	15	4
0	0	53734411	34536783	0	1	1	1	1	1	1	0	78	79.4665	33	0	0	0	1	0	0	0	5	2	2.5	0.28		0			0	0	0	0	0		0	1	1	0.039934	11	4	11	11	4	11	4
1	0	53734411	34536783	0	0	1	0	0	0	0	1	472	472.374	6.9	1	0	0	1	1	0	0	5	1	5	0.17021	0	0	0	0	1	0	0	1	0	0	0	1	1	0.032673	9	4	9	9	4	9	4
	0	53734411	34536783	0	0	1	0	0	0	0	1	861	861.86	44	0	0	0	1	0	0	0	5	2	2.5	0.12766	0	0	0	0	1	1	0	1	0	0	0	1	1	0.029043	8	4	8	8	4	8	4
0	0	53734411	34536783	1	1	1	1	0	0	0	1		891.471		0	0	0	1	0	0	0	5	2	2.5	0.28		0			0	0	0	0	0		0	1	1	0.039934	11	4	11	11	4	11	4
1	0	53734411	34536783	1	0	1	0	0	0	0	1	1284	1284.38	6.9	1	0	0	1	1	0	0	5	1	5	0.17021	0	0	0	0	1	0	0	1	0	0	0	1	1	0.032673	9	4	9	9	4	9	4
	0	53734411	34536783	1		1	0					1676		44	0	0	0	1	0	0	0	5	2	2.5	0.12766	0	0	0	0	1	1	0	1	0	0	0	1	1	0.029043	8	4	8	8	4	8	4
0	1	53231823	33326332	1	1		1	0	0	1	0	589	589.369	12.9	1	0	0	1	0	1	0	3	2	1.5	0.56	0	1	0	0	1	0	0	1	0	1	1	1	2	0.18712	24	6	12	24	6	24	6
1	1	53231823	33326332	1			1					960		35	0	1	1	1	0	1	0	3	1	3	0.5	1	1	0	0	1	0	0	1	0	0	0	1	2	0.093559	12	3	6	12	3	12	3
	1	53231823	33326332	1	1		1	0	0	0	1	1402	1338.49	36.4	0	0	1	1	0	1	0	3	2	1.5	0.53191	1	1	0	0	1	0	0	1	0	0	0	1	1	0.085762	11	3	11	11	3	11	3
0	0	18457757	17284565	1	1	1	0	0	0	0	0	837	838.608	12.9		0	0	1	0	1	0	4	2	2	0.37	0	1	0	0	0	0	0	0	0	1	0	1	1	0.13823	18	7	18	18	7	18	7
1	0	18457757	17284565	1	0	1	0	0	0	0	1	1215	1216.59	35	0	0	0	0	0	1	0	6	2	3	0.24468	0	1	1	1	1	1	0	1	0	0	0	1	0	0.10751	14	7		14	7	14	7
	0	18457757	17284565	0	1		0	1	0	1	0	162	181.608	2	1	0	0	0	0	1	0	8	5	1.6	0.074468	0	1	0	1	1	0	0	1	0	0	0	1	0	0.099832	13	4		13	4	13	4
	0	18457757	17284565	0	1		0	1	0	1	0	526	181.614	9.1	1	0	0	0	0	1	0	8	5	1.6	0.074468	0	1	0	1	1	0	0	1	0	0	0	1	0	0.099832	13	4		13	4	13	4
	0	18457757	17284565	0	1		0	1	0	1	0	385	405.618	2	1	0	0	0	0	1	0	8	5	1.6	0.074468	0	1	0	1	1	0	0	1	0	0	0	1	0	0.099832	13	4		13	4	13	4
0	0	32745743	32878844	1	1	1	1	1	0	1	0	305	305.515	83	1	0	1	0	1	1	1	11	3	3.6667	0.43	0	1	0	1	0	0	0	0	0	0	0	1	0	0.07445	36	4		36	4	36	4
1	0	32745743	32878844	1	0	1	0	0	0	0	1	675	675.409	0	0	0	0	0	1	1	1	13	3	4.3333	0.3617	0	1	0	1	1	0	1	0	0	0	1	1	0	0.099267	48	4		48	4	48	4
	0	32745743	32878844	1	1	1	0	0	0	0	1	1043	1046.61	0	0	0	0	0	1	1	1	12	2	6	0.39362	0	1	0	1	1	1	0	1	0	1	0	1	0	0.078586	38	4		38	4	38	4
0	0	32745743	32878844	1	1	1	0	0	0	1	0	413	413.52	83	1	0	1	0	1	1	1	11	3	3.6667	0.43	0	1	0	1	0	0	0	0	0	0	0	1	0	0.07445	36	4		36	4	36	4
1	0	32745743	32878844	1	1	1	0	0	0	1	0	783	783.398	0	0	0	0	0	1	1	1	13	3	4.3333	0.3617	0	1	0	1	1	0	1	0	0	0	1	1	0	0.099267	48	4		48	4	48	4
	0	32745743	32878844	1		1	0					1151		0	0	0	0	0	1	1	1	12	2	6	0.39362	0	1	0	1	1	1	0	1	0	1	0	1	0	0.078586	38	4		38	4	38	4
0	0	32745743	32878844	1	1	1	0	0	0	1	0		1147.52		1	0	1	0	1	1	1	11	3	3.6667	0.43	0	1	0	1	0	0	0	0	0	0	0	1	0	0.07445	36	4		36	4	36	4
1	0	32745743	32878844	1	0	1	0	0	0	0	1	1518	1517.4	0	0	0	0	0	1	1	1	13	3	4.3333	0.3617	0	1	0	1	1	0	1	0	0	0	1	1	0	0.099267	48	4		48	4	48	4
1	0	32745743	32878844	0	0		0	1	0	1	0		334.416		0	0	0	0	1	1	1	13	3	4.3333	0.3617	0	1	0	1	1	0	1	0	0	0	1	1	0	0.099267	48	4		48	4	48	4
	0	32745743	32878844	0			0					702		0	0	0	0	0	1	1	1	12	2	6	0.39362	0	1	0	1	1	1	0	1	0	1	0	1	0	0.078586	38	4		38	4	38	4
1	0	61161871	32878844	1	1		0	1	0	1	1	217	217.393	0	0	0	0	0	0	1	1	5	3	1.6667	0.48936	0	1	0	1	1	0	1	0	0	0	1	1	0	0.099267	48	4		48	4	48	4
0	0	15433144	32878844	0	1	1	1	0	0	1	0	796	796.536	83	1	0	0	0	0	1	1	10	4	2.5	0.4	0	1	0	1	0	0	0	0	0	0	0	1	0	0.07445	36	4		36	4	36	4
1	0	15433144	32878844	0	1	1	1	0	0	0	1	1166	1166.44	0	0	0	0	0	0	1	1	7	4	1.75	0.41489	0	1	0	1	1	0	1	0	0	0	1	1	0	0.099267	48	4		48	4	48	4
	0	15433144	32878844	0	0	1	1	0	0	0	1		1540.6		0	0	0	0	1	1	1	10	3	3.3333	0.31915	0	1	0	1	1	1	0	1	0	1	0	1	0	0.078586	38	4		38	4	38	4
0	0	15433144	32878844	1	1	1	0	0	0	0	1	1171	1171.54	83	1	0	0	0	0	1	1	10	4	2.5	0.4	0	1	0	1	0	0	0	0	0	0	0	1	0	0.07445	36	4		36	4	36	4
1	0	15433144	32878844	1	0	1	1	0	0	0	1	1808	1541.45	14.2	0	0	0	0	0	1	1	7	4	1.75	0.41489	0	1	0	1	1	0	1	0	0	0	1	1	0	0.099267	48	4		48	4	48	4
	0	15433144	32878844	1	1	1	1	0	0	0	1	1909	1915.61	0	0	0	0	0	1	1	1	10	3	3.3333	0.31915	0	1	0	1	1	1	0	1	0	1	0	1	0	0.078586	38	4		38	4	38	4
	0	53261875	32878844	0			0					1160	1386.6	30.5	0	0	0	0	1	1	1	23	3	7.6667	0.31915	0	1	0	1	1	1	0	1	0	1	0	1	0	0.078586	38	4		38	4	38	4
1	0	53261875	32878844	1	1		0	0	0	1	0		1219.4		0	0	0	0	1	1	1	22	4	5.5	0.3617	0	1	0	1	1	0	1	0	0	0	1	1	0	0.099267	48	4		48	4	48	4
	0	53261875	32878844	1	0		0	0	0	0	1		1595.58		0	0	0	0	1	1	1	23	3	7.6667	0.31915	0	1	0	1	1	1	0	1	0	1	0	1	0	0.078586	38	4		38	4	38	4
	0	53261875	32878844	1			0					1534		0	0	0	0	0	1	1	1	23	3	7.6667	0.31915	0	1	0	1	1	1	0	1	0	1	0	1	0	0.078586	38	4		38	4	38	4
1	0	53261875	32878844	0	1		0	1	0	1	0	423	424.425	0	0	0	0	0	1	1	1	22	4	5.5	0.3617	0	1	0	1	1	0	1	0	0	0	1	1	0	0.099267	48	4		48	4	48	4
	0	53261875	32878844	0			0					794		0	0	0	0	0	1	1	1	23	3	7.6667	0.31915	0	1	0	1	1	1	0	1	0	1	0	1	0	0.078586	38	4		38	4	38	4
1	0	53261875	32878844	0										0	0	0	0	0	1	1	1	22	4	5.5	0.3617	0	1	0	1	1	0	1	0	0	0	1	1	0	0.099267	48	4		48	4	48	4
	0	53261875	32878844	1	1		0	1	0	1	0	253	254.605	0	0	0	0	0	1	1	1	23	3	7.6667	0.31915	0	1	0	1	1	1	0	1	0	1	0	1	0	0.078586	38	4		38	4	38	4
0	0	45576444	87648634	1	1	1	1	1	1	1	0	81	79.4256	83	1	0	0	0	0	1	1	12	4	3	0.43	0	1	0	0	1	1	1	1	0	0	0	1	0	0.087017	22	3		22	3	22	3
1	0	45576444	87648634	1	1	1	1	1	0	1	0	445	445.319	1	0	0	0	0	1	1	1	10	3	3.3333	0.39362	0	1	0	0	1	1	1	1	0	0	0	1	0	0.063285	16	3		16	3	16	3
	0	45576444	87648634	1		1	1					823		0	0	0	0	0	1	1	1	13	2	6.5	0.52128	0	1	0	0	1	1	1	1	0	0	1	1	0	0.071196	18	3		18	3	18	3
0	0	45576444	87648634	1	1	1	1	0	0	0	1		1189.43		1	0	0	0	0	1	1	12	4	3	0.43	0	1	0	0	1	1	1	1	0	0	0	1	0	0.087017	22	3		22	3	22	3
1	0	45576444	87648634	1	1	1	1	0	0	0	1		1555.35		0	0	0	0	1	1	1	10	3	3.3333	0.39362	0	1	0	0	1	1	1	1	0	0	0	1	0	0.063285	16	3		16	3	16	3
	0	45576444	87648634	1		1	1					1998		30.5	0	0	0	0	1	1	1	13	2	6.5	0.52128	0	1	0	0	1	1	1	1	0	0	1	1	0	0.071196	18	3		18	3	18	3
	0	45576444	87648634	0	1		0	0	0	1	0	83	371.434	0	0	0	0	0	1	1	1	13	2	6.5	0.52128	0	1	0	0	1	1	1	1	0	0	1	1	0	0.071196	18	3		18	3	18	3
0	0	78117631	34334762	0	1	1	1	0	0	0	1	437	438.533	25.4	1	1	0	1	0	1	1	7	4	1.75	0.45	1	1	0	1	1	0	0	1	0	1	1	1	3	0.064391	18	3	6	18	3	18	3
1	0	78117631	34334762	0	1	1	1	0	0	0	1	868	844.429	94.5	1	1	1	1	0	1	1	8	4	2	0.39362	0	1	0	0	1	0	0	1	0	0	1	1	1	0.046505	13	3	13	13	3	13	3
	0	78117631	34334762	0	1	1	1	0	0	0	1	1303	1291.35	78.8	1	1	0	1	0	1	1	7	4	1.75	0.41489	1	1	0	0	0	0	0	0	0	0	1	1	2	0.046505	13	2	6.5	13	2	13	2
0	0	33331553	34334762	1	0	1	0	1	0	1	0	461	462.528	25.4	1	1	0	1	0	1	1	3	3	1	0.63	1	1	0	1	1	0	0	1	0	1	1	1	3	0.064391	18	3	6	18	3	18	3
1	0	14233275	34334762	1	1		1	1	0	1	0	249	240.511	31.5	1	1	1	1	0	0	1	3	2	1.5	0.54255	0	1	0	0	1	0	0	1	0	0	1	1	1	0.046505	13	3	13	13	3	13	3
	0	14233275	34334762	1			1					696		78.8	1	1	0	1	0	1	1	6	2	3	0.46809	1	1	0	0	0	0	0	0	0	0	1	1	2	0.046505	13	2	6.5	13	2	13	2
0	0	67284842	75426451	0	1	1	0	0	0	0	0	767	769.599	12.9	1	0	0	1	0	1	1	3	2	1.5	0.63	1	1	0	1	0	0	0	0	0	1	1	1	2	0.049773	11	3	5.5	11	3	11	3
0	0	32148773	75426451	1	1	1	0	1	0	1	0	219	221.602	12.9	0	1	1	1	0	1	1	6	2	3	0.46	1	1	0	1	0	0	0	0	0	1	1	1	2	0.049773	11	3	5.5	11	3	11	3
0	0	32148773	75426451	1	1	1	1	0	0	0	1	898	900.606	12.9	0	1	1	1	0	1	1	6	2	3	0.46	1	1	0	1	0	0	0	0	0	1	1	1	2	0.049773	11	3	5.5	11	3	11	3
1	0	32148773	75426451	1		1	1					1472		114.7	0	0	1	1	0	1	1	6	2	3	0.35106	0	1	1	0	1	0	0	1	0	0	1	1	1	0.16289	36	7	36	36	7	36	7
	0	32148773	75426451	1	0	1	0	0	0	0	1	1646	1647.62	2	0	1	1	0	0	1	1	7	3	2.3333	0.26596	0	1	0	1	0	0	0	0	0	0	0	1	1	0.1448	32	7	32	32	7	32	7
	0	25416684	75426451	0	1		0	0	0	0	1	734	995.428	2	0	1	1	1	0	1	1	5	3	1.6667	0.45745	0	1	0	1	0	0	0	0	0	0	0	1	1	0.1448	32	7	32	32	7	32	7
0	0	21712751	38836152	0	1	1	1	1	0	1	0		504.467		1	0	0	1	0	1	1	5	3	1.6667	0.49	0	1	0	0	0	0	0	0	0	0	0	1	1	0.097151	10	3	10	10	3	10	3
1	0	21712751	38836152	0	0	1	0	0	0	0	1	874	874.602	0	1	0	1	1	0	1	0	5	2	2.5	0.3617	0	1	0	0	1	0	0	1	0	0	0	1	1	0.087436	9	3	9	9	3	9	3
0	1	47681465	28841117	0	1		1	1	0	1	0	340	338.622	83	1	0	1	1	0	1	1	8	4	2	0.43	1	1	0	1	0	0	0	0	0	0	0	1	1	0.090571	25	6	25	25	6	25	6
1	1	47681465	28841117	0	1		1	0	0	0	1	709	732.585	0	0	1	1	1	1	1	1	11	3	3.6667	0.39362	1	1	1	0	1	0	0	1	0	0	0	1	2	0.094194	26	3	13	26	3	26	3
	1	47681465	28841117	0	1		1	0	0	0	1	1108	1104.6	2	0	1	1	1	0	1	1	9	3	3	0.39362	1	1	0	0	1	0	1	1	0	0	0	1	1	0.047097	13	2	13	13	2	13	2
0	1	53831641	28841117	0	1	1	0	0	0	1	0		1026.63		1	0	1	0	1	1	1	12	3	4	0.33	1	1	0	1	0	0	0	0	0	0	0	1	1	0.090571	25	6	25	25	6	25	6
1	1	53831641	28841117	0	0	1	0	0	0	0	1		1420.61		0	1	1	1	1	1	1	11	3	3.6667	0.37234	1	1	1	0	1	0	0	1	0	0	0	1	2	0.094194	26	3	13	26	3	26	3
	1	53831641	28841117	0	1	1	0	0	0	0	1	1791	1808.51	2	0	1	1	0	1	1	1	14	3	4.6667	0.39362	1	1	0	0	1	0	1	1	0	0	0	1	1	0.047097	13	2	13	13	2	13	2
1	1	53831641	28841117	0	1		1	1	1	1	0	180	203.407	0	0	1	1	1	1	1	1	11	3	3.6667	0.37234	1	1	1	0	1	0	0	1	0	0	0	1	2	0.094194	26	3	13	26	3	26	3
	1	53831641	28841117	0	1		1	0	0	1	0		830.494		0	1	1	0	1	1	1	14	3	4.6667	0.39362	1	1	0	0	1	0	1	1	0	0	0	1	1	0.047097	13	2	13	13	2	13	2
0	0	61235864	36328244	0	1	1	0	0	0	0	0	1059	1058.48	83	1	0	0	1	0	1	1	7	3	2.3333	0.45	0	1	0	1	1	0	1	1	0	0	0	1	1		16	3	16	16	3	16	3
1	0	61235864	36328244	0	1	1	0	0	0	0	1		1454.43		0	0	0	1	1	1	1	7	2	3.5	0.38298	0	1	1	1	1	0	0	1	0	0	0	1	1		18	3	18	18	3	18	3
	0	61235864	36328244	0		1	0					1823		2	0	0	1	1	1	1	1	7	2	3.5	0.38298	0	1	0	0	1	0	1	1	0	0	0	1	1		18	3	18	18	3	18	3
0	0	83422366	36328244	1	0	1	0	0	0	1	0	971	970.497	83	1	0	0	1	0	1	1	4	2	2	0.55	0	1	0	1	1	0	1	1	0	0	0	1	1		16	3	16	16	3	16	3
1	0	83422366	36328244	1	1	1	1	0	0	0	1		1366.45		0	0	0	1	0	1	1	4	2	2	0.52128	0	1	1	1	1	0	0	1	0	0	0	1	1		18	3	18	18	3	18	3
	0	83422366	36328244	1		1	1					1735		2	0	0	1	1	0	1	1	4	2	2	0.52128	0	1	0	0	1	0	1	1	0	0	0	1	1		18	3	18	18	3	18	3
1	0	87883827	36328244	0	1		1	1	0	1	0	204	199.454	35	0	0	0	1	0	1	1	3	3	1	0.6383	0	1	1	1	1	0	0	1	0	0	0	1	1		18	3	18	18	3	18	3
1	0	11486551	31834437	1	0		0	0	0	0	0	1648	1628.31	83.8	1	0	1	1	0	1	1	5	2	2.5	0.30851	1	1	0	1	1	1	0	0	0	0	0	1	1	0.039867	10	2	10	10	2	10	2
	0	11486551	31834437	1	1		0	0	0	0	1		2081.56		0	0	1	1	0	1	1	5	2	2.5	0.35106	1	1	0	0	1	0	1	0	0	0	1	1	1	0.039867	10	2	10	10	2	10	2
0	0	25512164	31834437	0	1	1	0	0	0	0	0	1086	1086.56	25.4	0	0	1	1	1	1	1	5	1	5	0.39	1	1	0	1	0	0	0	0	0	1	1	1	1	0.019934	5	2	5	5	2	5	2
1	0	25512164	31834437	0	1	1	0	0	0	0	0	1533	1511.31	87.9	1	0	1	1	0	1	1	5	2	2.5	0.45745	1	1	0	1	1	1	0	0	0	0	0	1	1	0.039867	10	2	10	10	2	10	2
	0	25512164	31834437	0	1	1	0	0	0	0	1	2087	1964.58	20	0	0	1	1	0	1	1	5	2	2.5	0.43617	1	1	0	0	1	0	1	0	0	0	1	1	1	0.039867	10	2	10	10	2	10	2
0	0	44725862	45743646	1	0	0	0	0	0	0	0	1449	1449.54	83	0	0	0	1	0	1	1	4	3	1.3333	0.48	1	1	0	1	1	0	1	0	0	0	0	1	0	0.018957	7	3		7	3	7	3
0	0	45678865	74747556	1	0	1	0	0	0	0	0	1188	1186.63	83	1	0	0	1	0	1	1	5	2	2.5	0.49	0	1	0	1	1	1	0	1	0	1	1	1	1	0.19011	25	3	25	25	3	25	3
1	0	45678865	74747556	1	1	1	0	0	0	0	1		1822.32		0	0	0	1	1	1	1	4	1	4	0.5	0	1	0	0	1	0	0	1	0	0	0	2	2	0.19772	13	2	13	26	4	13	2
	0	45678865	74747556	1	1	1	0	0	0	0	1	1922	1920.46	0	1	1	0	1	0	1	1	5	3	1.6667	0.48936	0	1	0	0	1	1	1	1	0	1	1	2	2	0.19011	12.5	1.5	12.5	25	3	12.5	1.5
0	0	65886624	74747556	0	0	1	0	0	0	0	0		1099.61		1	0	0	1	0	1	1	10	4	2.5	0.45	0	1	0	1	1	1	0	1	0	1	1	1	1	0.19011	25	3	25	25	3	25	3
1	0	65886624	74747556	0	0	1	1	0	0	0	1	1504	1735.32	35	0	0	0	1	0	1	1	9	3	3	0.39362	0	1	0	0	1	0	0	1	0	0	0	2	2	0.19772	13	2	13	26	4	13	2
	0	65886624	74747556	0	0	1	1	0	0	0	1	1841	1833.37	0	1	1	0	1	0	1	1	14	5	2.8	0.39362	0	1	0	0	1	1	1	1	0	1	1	2	2	0.19011	12.5	1.5	12.5	25	3	12.5	1.5
1	0	65886624	74747556	0	0		1	0	0	1	0	295	526.331	35	0	0	0	1	0	1	1	9	3	3	0.39362	0	1	0	0	1	0	0	1	0	0	0	2	2	0.19772	13	2	13	26	4	13	2
	0	65886624	74747556	0	1		0	0	0	1	0	624	626.406	0	1	1	0	1	0	1	1	14	5	2.8	0.39362	0	1	0	0	1	1	1	1	0	1	1	2	2	0.19011	12.5	1.5	12.5	25	3	12.5	1.5
	0	65886624	74747556	1	1		1	1	0	1	0	149	150.41	0	1	1	0	1	0	1	1	14	5	2.8	0.39362	0	1	0	0	1	1	1	1	0	1	1	2	2	0.19011	12.5	1.5	12.5	25	3	12.5	1.5
	0	65886624	74747556	0	1		1	1	0	1	0	125	124.361	0	1	1	0	1	0	1	1	14	5	2.8	0.39362	0	1	0	0	1	1	1	1	0	1	1	2	2	0.19011	12.5	1.5	12.5	25	3	12.5	1.5
	0	65886624	74747556											30.5	1	1	0	1	0	1	1	14	5	2.8	0.39362	0	1	0	0	1	1	1	1	0	1	1	2	2	0.19011	12.5	1.5	12.5	25	3	12.5	1.5
0	0	45625323	74747556	0	1	1	1	0	0	1	0	835	826.636	12.9	1	0	0	1	0	1	1	4	2	2	0.55	0	1	0	1	1	1	0	1	0	1	1	1	1	0.19011	25	3	25	25	3	25	3
1	0	45625323	74747556	0	1	1	0	0	0	0	1	1192	1232.42	0	0	0	0		0	1	1	4	2	2	0.55	0	1	0	0	1	0	0	1	0	0	0	2	2	0.19772	13	2	13	26	4	13	2
0	0	34375334	22324523	0	1	1	1	1	1	1	0	86	86.62	12.9	1	0	0	1	1	1	1	15	3	5	0.43	0	0	0	1	0	0	0	0	0	0	1	1	1	0.035619	13	2	13	13	2	13	2
1	0	34375334	22324523	0	1	1	0	0	0	0	1		464.551		1	0	1	1	1	1	1	12	3	4	0.39362	0	1	0	1	1	0	1	0	0	0	0	2	1	0.065758	12	1.5	24	24	3	12	1.5
0	0	71224331	82158738	0	1	1	1	1	1	1	0	164	165.532	12.9	1	1	0	1	0	1	1	8	5	1.6	0.43	0	1	0	0	0	0	0	0	0	0	0	1	1	0.019901	9	3	9	9	3	9	3
0	0	41253864	82158738	0	1	1	1	1	1	1	0	81	82.5378	12.9	1	1	0	1	0	1	1	6	3	2	0.4	0	1	0	0	0	0	0	0	0	0	0	1	1	0.019901	9	3	9	9	3	9	3
0	0	36541167	38765412	1	0	1	1	0	0	0	1		1204.53		0	0	0	1	0	1	1	7	3	2.3333	0.27	0	0	0	1	1	0	0	1	0	1	0	1	1	0.027451	11	3	11	11	3	11	3
1	0	36541167	38765412	1	0	1	1	0	0	0	1		1577.52		0	0	0	1	0	1	1	6	3	2	0.28723	0	0	0	0	1	0	0	1	0	0	0	1	1	0.027451	11	3	11	11	3	11	3
	0	36541167	38765412	1	0	1	0	0	0	0	1	2114	1962.52	218.2	0	0	0	0	0	1	1	5	2	2.5	0.34043	0	0	0	0	0	0	0	0	0	0	0	1	0	0.027451	11	3		11	3	11	3
0	0	22627548	85868815	1	1	1	0	1	0	1	0	379	379.466	12.9	1	0	1	1	0	1	1	7	4	1.75	0.35	0	1	0	1	1	0	0	1	0	0	1	1	2	0.050501	12	2	6	12	2	12	2
1	0	22627548	85868815	1	1	1	1	0	0	0	1	748	749.498	0	1	0	1	1	0	1	1	8	5	1.6	0.39362	0	1	1	1	1	0	0	1	0	1	0	1	2	0.054709	13	2	6.5	13	2	13	2
	0	22627548	85868815	1	1	1	0	0	0	0	1	1125	1123.56	2	1	0	1	1	0	1	1	4	3	1.3333	0.55319	0	1	1	0	1	0	0	1	0	0	1	1	1	0.033667	8	2	8	8	2	8	2
0	0	47778617	85868815	0	1	1	0	0	0	1	0		1148.48		1	0	1	1	0	1	0	5	4	1.25	0.38	0	1	0	1	1	0	0	1	0	0	1	1	2	0.050501	12	2	6	12	2	12	2
1	0	47778617	85868815	0	0	1	0	0	0	0	1	1517	1518.49	0	1	0	1	1	1	1	0	7	2	3.5	0.34043	0	1	1	1	1	0	0	1	0	1	0	1	2	0.054709	13	2	6.5	13	2	13	2
	0	47778617	85868815	0		1	0					1894		2	1	0	1	1	0	1	0	4	2	2	0.47872	0	1	1	0	1	0	0	1	0	0	1	1	1	0.033667	8	2	8	8	2	8	2
	0	47778617	85868815	1	1		1	1	0	1	0	433	433.505	2	1	0	1	1	0	1	0	4	2	2	0.47872	0	1	1	0	1	0	0	1	0	0	1	1	1	0.033667	8	2	8	8	2	8	2
0	0	57683837	21714176	1	1	1	1	1	0	1	0		238.564		1	0	1	0	0	1	1	8	3	2.6667	0.43	0	1	0	0	1	0	0	1	0	0	0	1	0	0.054596	15	3		15	3	15	3
1	0	57683837	21714176	1	0	1	0	0	0	0	1		621.484		1	0	1	1	0	1	1	8	3	2.6667	0.39362	0	1	1	0	1	0	0	1	0	0	0	2	1	0.054596	7.5	1.5	15	15	3	7.5	1.5
	0	57683837	21714176	1	1	1	1	0	0	0	1	972	971.378	0	1	0	1	1	1	1	1	8	2	4	0.39362	0	1	0	0	1	0	0	1	0	0	0	2	1	0.050957	7	1.5	14	14	3	7	1.5
1	0	35838148	21714176	0	1		0	1	0	1	0	358	358.403	1	1	0	1	0	0	1	0	7	3	2.3333	0.19149	0	1	1	0	1	0	0	1	0	0	0	2	1	0.054596	7.5	1.5	15	15	3	7.5	1.5
	0	35838148	21714176	0	1		0	0	0	1	0	726	726.39	0	1	0	1	1	0	1	0	5	3	1.6667	0.26596	0	1	0	0	1	0	0	1	0	0	0	2	1	0.050957	7	1.5	14	14	3	7	1.5
0	0	24164756	87677144	1	1	1	0	1	0	1	0		554.612		1	0	0	1	0	1	0	8	4	2	0.26	1	1	0	1	1	0	0	1	0	0	1	1	5	0.041569	37	8	7.4	37	8	37	8
1	0	24164756	87677144	1	0	1	1	0	0	1	0	928	928.504	35	0	0	0	1	0	1	1	9	5	1.8	0.3617	1	1	0	1	1	0	0	1	0	0	1	2	5	0.039322	17.5	5	7	35	10	17.5	5
	0	24164756	87677144	1	0	1	0	0	0	0	1	1314	1568.46	2	0	0	1	1	0	1	0	9	5	1.8	0.28723	1	1	0	1	1	0	0	1	0	0	1	2	2	0.031458	14	4.5	14	28	9	14	4.5
0	0	81173544	87677144	1	1	1	0	0	0	0	1		1003.63		1	0	0	0	0	1	0	5	2	2.5	0.26	1	1	0	1	1	0	0	1	0	0	1	1	5	0.041569	37	8	7.4	37	8	37	8
0	0	81578752	87677144	1	0	1	1	1	0	1	0	404	404.602	12.9	1	0	0	1	0	1	1	7	4	1.75	0.45	1	1	0	1	1	0	0	1	0	0	1	1	5	0.041569	37	8	7.4	37	8	37	8
1	0	81578752	87677144	1	1	1	1	0	0	0	1	778	778.526	35	0	0	0	1	0	1	1	9	3	3	0.39362	1	1	0	1	1	0	0	1	0	0	1	2	5	0.039322	17.5	5	7	35	10	17.5	5
	0	81578752	87677144	1	0	1	1	0	0	0	1	1160	1163.46	2	0	0	1	1	0	1	1	5	3	1.6667	0.48936	1	1	0	1	1	0	0	1	0	0	1	2	2	0.031458	14	4.5	14	28	9	14	4.5
0	0	17411825	36546772	1	1	1	1	1	0	1	0	268	269.633	83	1	0	1	1	0	1	1	7	4	1.75	0.45	1	1	1	0	1	1	0	1	0	0	1	1	1	0.032493	19	5	19	19	5	19	5
0	0	17411825	36546772	0	1	1	1	1	1	1	0		269.636		1	0	1	1	0	1	1	7	4	1.75	0.45	1	1	1	0	1	1	0	1	0	0	1	1	1	0.032493	19	5	19	19	5	19	5
	0	17411825	36546772	0	1	1	0	0	0	0	1	1023	1024.55	2	0	0	1	1	0	1	1	7	5	1.4	0.54255	1	1	0	1	1	1	0	1	0	0	1	1	1	0.025652	15	4	15	15	4	15	4
0	0	17411825	36546772	1	1	1	0	0	0	1	0	1067	1069.64	83	1	0	1	1	0	1	1	7	4	1.75	0.45	1	1	1	0	1	1	0	1	0	0	1	1	1	0.032493	19	5	19	19	5	19	5
1	0	17411825	36546772	1	1	1	0	0	0	0	1	1653	1478.7	114.7	0	0	1	1	0	1	1	6	6	1	0.46809	1	1	1	0	1	1	1	0	0	1	0	1	2	0.027362	16	3	8	16	3	16	3
	0	17411825	36546772	1	0	1	0	0	0	0	1	1823	1824.56	2	0	0	1	1	0	1	1	7	5	1.4	0.54255	1	1	0	1	1	1	0	1	0	0	1	1	1	0.025652	15	4	15	15	4	15	4
0	0	17411825	36546772	1	1	1	0	0	0	0	1	1319	1321.64	83	1	0	1	1	0	1	1	7	4	1.75	0.45	1	1	1	0	1	1	0	1	0	0	1	1	1	0.032493	19	5	19	19	5	19	5
	0	17411825	36546772	1	1	1	0	0	0	0	1	2147	2076.57	29.3	0	0	1	1	0	1	1	7	5	1.4	0.54255	1	1	0	1	1	1	0	1	0	0	1	1	1	0.025652	15	4	15	15	4	15	4
1	0	11842588	36546772	1	1		0	0	0	1	0	523	523.504	0	0	0	1	1	0	1	1	6	2	3	0.32979	1	1	1	0	1	1	1	0	0	1	0	1	2	0.027362	16	3	8	16	3	16	3
	0	11842588	36546772	1	1		0	0	0	0	0	910	912.53	2	0	0	1	1	0	1	1	8	3	2.6667	0.3617	1	1	0	1	1	1	0	1	0	0	1	1	1	0.025652	15	4	15	15	4	15	4
1	0	11842588	36546772	0	1		0	0	0	1	0	523	523.511	0	0	0	1	1	0	1	1	6	2	3	0.32979	1	1	1	0	1	1	1	0	0	1	0	1	2	0.027362	16	3	8	16	3	16	3
	0	11842588	36546772	0	1		0	0	0	0	0	911	912.539	2	0	0	1	1	0	1	1	8	3	2.6667	0.3617	1	1	0	1	1	1	0	1	0	0	1	1	1	0.025652	15	4	15	15	4	15	4
0	0	54818357	36546772			1	0	1	0	1	0	132	134.62	83	1	0	1	1	1	1	1	7	2	3.5	0.45	1	1	1	0	1	1	0	1	0	0	1	1	1	0.032493	19	5	19	19	5	19	5
	0	17741378	36546772											29.3	0	0	1	1	1	1	1	5	1	5	0.42553	1	1	0	1	1	1	0	1	0	0	1	1	1	0.025652	15	4	15	15	4	15	4
0	1	32341553	63716216	1	1	1	1	0	0	1	0	364	364.41	70.1	1	0	1	1	0	1	1	15	5	3	0.43	0	1	0	0	1	1	0	0	0	0	1	1	2	0.10557	31	3	15.5	31	3	31	3
0	1	32341553	63716216	1	0	1	1	0	0	1	0	534	534.413	70.1	1	0	1	1	0	1	1	15	5	3	0.43	0	1	0	0	1	1	0	0	0	0	1	1	2	0.10557	31	3	15.5	31	3	31	3
0	1	32341553	63716216	1	1	1	0	0	0	1	0		211.416		1	0	1	1	0	1	1	15	5	3	0.43	0	1	0	0	1	1	0	0	0	0	1	1	2	0.10557	31	3	15.5	31	3	31	3
1	1	58786725	63716216	1	1		1	1	0	1	0	153	154.635	1	1	1	1	1	0	1	0	7	3	2.3333	0.34043	1	1	0	0	1	1	0	1	0	0	1	1	2	0.081733	24	3	12	24	3	24	3
0	0	78766756	14378133	0	1	1	1	1	1	1	0	136	136.912	12.9	1	0	0	1	0	1	0	3	2	1.5	0.42	0	1	0	1	1	0	0	1	0	1	1	1	1	0.15652	31	4	31	31	4	31	4
1	0	78766756	14378133	0	1	1	1	1	0	1	0		516.452		0	0	0	1	0	1	0	3	2	1.5	0.41489	0	1	0	1	1	1	0	1	0	1	1	1	2	0.090885	18	4	9	18	4	18	4
	0	78766756	14378133	0	0	1	0	0	0	0	1	884	1152.38	2	0	0	1	1	0	1	0	3	1	3	0.38298	0	1	0	0	0	0	0	0	0	0	0	1	3	0.12623	25	4	8.3333	25	4	25	4
0	0	36212458	14378133	0	1	1	0	0	0	0	0	1254	1236.38	0	1	0	0	1	0	1	0	6	2	3	0.37	0	1	0	1	1	0	0	1	0	1	1	1	1	0.15652	31	4	31	31	4	31	4
1	0	36212458	14378133	0	1	1	0	0	0	0	1	1615	1638.32	35	0	0	0	1	0	1	0	3	3	1	0.53191	0	1	0	1	1	1	0	1	0	1	1	1	2	0.090885	18	4	9	18	4	18	4
0	0	14225147	14378133	1	1	1	0	1	0	1	0	262	252.458	0	1	0	0	1	0	1	0	5	3	1.6667	0.45	0	1	0	1	1	0	0	1	0	1	1	1	1	0.15652	31	4	31	31	4	31	4
1	0	14225147	14378133	1	1	1	1	0	0	0	1	625	623.381	35	0	0	0	1	0	1	1	5	3	1.6667	0.48936	0	1	0	1	1	1	0	1	0	1	1	1	2	0.090885	18	4	9	18	4	18	4
	0	14225147	14378133	1	1	1	0	0	0	0	1		1257.39		0	0	1	1	0	1	0	5	3	1.6667	0.41489	0	1	0	0	0	0	0	0	0	0	0	1	3	0.12623	25	4	8.3333	25	4	25	4
0	0	61472228	35132144	1	1	1	0	0	0	0	1	1142	1143.35	12.9	1	0	0	1	0	1	0	6	3	2	0.43	1	1	0	1	0	0	0	0	0	0	0	1	1	0.051999	10	3	10	10	3	10	3
1	0	61472228	35132144	1	1	1	0	0	0	0	1	1718	1511.52	118.1	1	0	0	1	0	1	0	6	2	3	0.39362	0	1	0	0	1	0	0	1	0	0	0	1	1	0.072799	14	4	14	14	4	14	4
	0	61472228	35132144	1	1	1	1	0	0	0	1	1891	2150.5	2	1	0	1	1	0	1	1	6	2	3	0.46809	0	1	0	0	1	0	0	1	0	0	0	1	1	0.051999	10	3	10	10	3	10	3
0	0	34533812	62558135	1	0	1	0	0	0	0	0	1524	1521.37	8.9	1	0	1	1	0	1	1	10	4	2.5	0.36	1	1	0	0	1	0	0	1	0	1	1	1	1	0.022954	9	2	9	9	2	9	2
1	0	34533812	62558135	1	1	1	0	0	0	0	1	1902	1903.38	45.2	0	0	1	1	0	1	1	7	3	2.3333	0.41489	0	1	0	0	1	0	0	1	0	0	0	1	1	0.040807	16	4	16	16	4	16	4
0	0	72816555	62558135	1	1	1	0	1	1	1	0		59.367		1	1	1	1	0	1	1	6	2	3	0.37	1	1	0	0	1	0	0	1	0	1	1	1	1	0.022954	9	2	9	9	2	9	2
1	0	72816555	62558135	1	1	1	0	1	0	1	0	440	441.426	45.2	0	0	1	1	1	1	1	7	2	3.5	0.30851	0	1	0	0	1	0	0	1	0	0	0	1	1	0.040807	16	4	16	16	4	16	4
	0	61184462	62558135	0	1		1	1	1	1	0	44	43.3378	21.9	1	0	0	1	0	1	1	3	3	1	0.60638	1	1	0	0	1	1	0	1	0	0	1	1	1	0.028055	11	3	11	11	3	11	3
0	0	13646623	84424228	1	1	1	1	0	0	1	0		675.412		1	0	1	1	0	1	1	3	2	1.5	0.53	1	1	0	1	0	0	0	0	0	0	0	1	1	0.065808	11	3	11	11	3	11	3
1	0	13646623	84424228	1	1	1	1	0	0	0	1		1058.57		1	0	1	1	0	1	1	3	2	1.5	0.5	0	1	1	0	0	0	0	0	0	1	0	1	1	0.035895	6	2	6	6	2	6	2
0	0	73486137	84424228	1	0	1	1	0	0	1	0		784.398		1	0	1	1	0	1	1	3	2	1.5	0.56	1	1	0	1	0	0	0	0	0	0	0	1	1	0.065808	11	3	11	11	3	11	3
0	0	23875625	84424228	1	1	1	1	1	1	1	0		67.3904		1	0	1	1	0	1	1	5	3	1.6667	0.39	1	1	0	1	0	0	0	0	0	0	0	1	1	0.065808	11	3	11	11	3	11	3
1	0	23875625	84424228	1	1	1	1	0	0	1	0		447.335		1	0	1	1	0	1	1	3	2	1.5	0.60638	0	1	1	0	0	0	0	0	0	1	0	1	1	0.035895	6	2	6	6	2	6	2
	0	23875625	84424228	1	1	1	0	0	0	0	0	815	821.522	21.9	0	0	1	1	0	1	1	5	4	1.25	0.42553	1	1	0	1	0	0	0	0	0	0	0	1	1	0.035895	6	2	6	6	2	6	2
0	0	72623426	81647441	1	1	1	1	0	0	1	0	658	658.472	9.9	1	0	1	1	0	1	1	4	2	2	0.58	0	1	0	0	1	0	0	1	0	0	1	1	1	0.041031	9	3	9	9	3	9	3
1	0	72623426	81647441	1	1	1	1	0	0	0	1	1040	1040.52	45.2	1	0	1	1	0	1	1	3	2	1.5	0.57447	0	1	0	0	0	0	0	0	0	0	1	1	1	0.027354	6	4	6	6	4	6	4
	0	72623426	81647441	1	1	1	1	0	0	0	1	1412	1412.41	21.9	0	0	1	1	0	1	1	3	2	1.5	0.60638	0	1	1	0	1	0	0	1	0	0	1	1	1	0.050149	11	4	11	11	4	11	4
0	0	24818688	54476126	1	0	1	1	0	0	1	0	1275	1271.5	8.9	1	0	0	1	0	1	1	5	4	1.25	0.52	0	1	0	0	1	0	0	1	0	0	1	1	1	0.050956	11	1	11	11	1	11	1
1	0	24818688	54476126	1		1	1					1661		11.2	1	0	1	1	0	1	1	7	3	2.3333	0.38298	0	1	0	0	1	0	0	1	0	0	1	1	1	0.032426	7	1	7	7	1	7	1
0	0	73425486	41666457	1	1	1	0	1	0	1	0	404	403.352	8.9	1	0	0	1	0	1	0	4	2	2	0.45	0	1	0	0	1	0	0	1	0	0	1	1	1	0.025912	9	3	9	9	3	9	3
1	0	73425486	41666457	1	1	1	0	0	0	1	0	791	787.44	11.2	0	0	1	1	0	1	1	4	2	2	0.52128	0	1	0	0	0	0	0	0	0	0	0	1	1	0.025912	9	3	9	9	3	9	3
	0	73425486	41666457	1	1	1	0	0	0	0	1	1167	1162.34	0	0	0	0	1	0	1	1	5	2	2.5	0.42553	0	1	0	0	1	0	0	1	0	0	0	1	1	0.03167	11	5	11	11	5	11	5
0	0	73425486	41666457	0	1	1	0	0	0	0	1	1456	1457.35	8.9	1	0	0	1	0	1	0	4	2	2	0.45	0	1	0	0	1	0	0	1	0	0	1	1	1	0.025912	9	3	9	9	3	9	3
1	0	73425486	41666457	0	1	1	0	0	0	0	1	1851	1841.45	2	0	0	1	1	0	1	1	4	2	2	0.52128	0	1	0	0	0	0	0	0	0	0	0	1	1	0.025912	9	3	9	9	3	9	3
	0	73425486	41666457	0	1	1	0	0	0	0	1	2220	2216.34	0	0	0	0	1	0	1	1	5	2	2.5	0.42553	0	1	0	0	1	0	0	1	0	0	0	1	1	0.03167	11	5	11	11	5	11	5
1	0	47615264	67411526	1	1		0	1	0	1	0	340	425.223	13.2	1	0	0	1	0	1	1	3	2	1.5	0.45745	0	1	0	0	0	0	0	0	0	0	0	1	1	0.018909	6	4	6	6	4	6	4
	0	47615264	67411526	1	1		0	0	0	0	1	816	816.394	59.5	1	0	0	1	0	1	1	3	3	1	0.48936	0	1	0	0	0	0	0	0	0	0	0	1	1	0.025213	8	3	8	8	3	8	3
0	0	82343425	67411526	1	0	1	1	0	0	0	1			8.9	1	0	0	1	0	1	1	4	3	1.3333	0.55	0	1	0	0	0	0	0	0	0	0	1	1	1	0.025213	8	2	8	8	2	8	2
0	0	34315844	21157244	1	1	1	0	0	0	1	0		823.394		1	0	1	1	0	1	1	4	2	2	0.45	0	1	0	1	0	0	0	0	0	0	0	1	1	0.030906	12	5	12	12	5	12	5
1	0	34315844	21157244	1	0	1	0	0	0	0	1		1206.41		0	1	1	1	0	1	1	4	2	2	0.44681	1	1	0	0	1	1	0	0	0	0	0	1	1	0.048935	19	5	19	19	5	19	5
	0	34315844	21157244	1	1	1	0	0	0	0	1	1836	1684.48	227.1	0	1	1	1	1	1	1	6	1	6	0.43617	1	1	0	0	0	0	0	0	0	0	0	1	1	0.048935	19	5	19	19	5	19	5
0	0	84616844	21157244	1	0	1	1	0	0	1	0		811.385		1	0	1	1	0	1	0	3	2	1.5	0.46	0	1	0	1	0	0	0	0	0	0	0	1	1	0.030906	12	5	12	12	5	12	5
1	0	57488554	21157244	1	1		1	0	0	1	0	312	306.402	11.2	0	1	1	1	0	1	1	3	2	1.5	0.58511	1	1	0	0	1	1	0	0	0	0	0	1	1	0.048935	19	5	19	19	5	19	5
	0	57488554	21157244	1	1		0	1	0	0	1	780	784.486	59.5	0	1	1	1	0	1	1	3	1	3	0.60638	1	1	0	0	0	0	0	0	0	0	0	1	1	0.048935	19	5	19	19	5	19	5
0	0	64553716	24534171	0		1	1	0	0	1	0		778.424		1	0	1	1	0	1	0	3	2	1.5	0.58	0	1	0	0	0	0	0	0	0	0	0	1	1	0.018575	11	5	11	11	5	11	5
0	0	86645786	24534171	0	1	1	1	1	0	1	0	143	141.417	8.9	1	0	1	1	0	1	0	3	2	1.5	0.61	0	1	0	0	0	0	0	0	0	0	0	1	1	0.018575	11	5	11	11	5	11	5
1	0	86645786	24534171	0	1	1	1	0	0	0	1	524	523.302	13.2	1	0	0	1	0	1	1	3	1	3	0.60638	0	1	0	0	0	0	0	0	0	0	0	1	1	0.015198	9	3	9	9	3	9	3
	0	86645786	24534171	0	1	1	0	0	0	0	1	1001	1002.47	24.4	0	1	1	1	0	1	1	2	1	2	0.68085	1	1	0	0	0	0	0	0	0	0	0	1	1	0.023641	14	6	14	14	6	14	6
0	0	46551262	76187155	0	1	1	1	0	0	1	0		249.42		1	0	0	1	0	1	1	3	2	1.5	0.63	1	1	1	1	1	0	0	1	0	1	1	1	1	0.039626	16	8	16	16	8	16	8
	0	46551262	76187155	0		1	1					1196		363.2	0	1	1		0	1	1	3	2	1.5	0.63	1	1	0	0	0	0	0	0	0	0	1	1	0	0.054486	22	6		22	6	22	6
0	0	12456726	76187155	1	1	1	0	0	0	1	0	274	275.442	12.9	1	0	0	1	0	1	0	5	2	2.5	0.42	1	1	1	1	1	0	0	1	0	1	1	1	1	0.039626	16	8	16	16	8	16	8
1	0	12456726	76187155	1	1	1	0	0	0	0	1	654	659.359	35	0	0	0	0	0	1	0	4	2	2	0.44681	1	1	1	1	1	1	0	1	0	1	1	1	1	0.044579	18	4	18	18	4	18	4
	0	12456726	76187155	1	1	1	0	0	0	0	1	1222	1065.35	363.2	0	1	1	0	0	1	0	4	2	2	0.44681	1	1	0	0	0	0	0	0	0	0	1	1	0	0.054486	22	6		22	6	22	6
	0	12456726	76187155	1	1		1	0	0	1	0	294	517.459	42.2	0	1	1	0	0	1	0	4	2	2	0.44681	1	1	0	0	0	0	0	0	0	0	1	1	0	0.054486	22	6		22	6	22	6
1	0	45854685	76187155	1	1		1	0	0	0	1		1800.51		0	0	0	1	0	1	1	4	2	2	0.52128	1	1	1	1	1	1	0	1	0	1	1	1	1	0.044579	18	4	18	18	4	18	4
	0	45854685	76187155	1	1		1	0	0	0	1	2400	2212.39	97.1	0	1	1	0	0	1	1	4	2	2	0.52128	1	1	0	0	0	0	0	0	0	0	1	1	0	0.054486	22	6		22	6	22	6
1	0	45854685	76187155	0	1		1	0	0	0	1	1068	1064.51	35	0	0	0	1	0	1	1	4	2	2	0.52128	1	1	1	1	1	1	0	1	0	1	1	1	1	0.044579	18	4	18	18	4	18	4
	0	45854685	76187155	0	1		1	0	0	0	1	1474	1476.4	42.2	0	1	1	0	0	1	1	4	2	2	0.52128	1	1	0	0	0	0	0	0	0	0	1	1	0	0.054486	22	6		22	6	22	6
1	0	73264513	76187155	1	1		0	1	0	1	0	208	206.352	35	0	0	0	1	0	1	1	5	2	2.5	0.45745	1	1	1	1	1	1	0	1	0	1	1	1	1	0.044579	18	4	18	18	4	18	4
	0	73264513	76187155	1	1		0	1	0	1	0	621	620.342	42.5	0	1	1	0	1	1	1	7	2	3.5	0.38298	1	1	0	0	0	0	0	0	0	0	1	1	0	0.054486	22	6		22	6	22	6
1	0	73264513	76187155	1	1		0	0	0	0	1	1138	1136.36	35	0	0	0	1	0	1	1	5	2	2.5	0.45745	1	1	1	1	1	1	0	1	0	1	1	1	1	0.044579	18	4	18	18	4	18	4
	0	73264513	76187155	1	1		0	0	0	0	1	1702	1550.34	363.2	0	1	1	0	1	1	1	7	2	3.5	0.38298	1	1	0	0	0	0	0	0	0	0	1	1	0	0.054486	22	6		22	6	22	6
0	0	83121325	76321241	0	0	1	0	0	0	1	0		600.42		1	0	1	1	0	1	1	6	2	3	0.37	0	1	0	0	0	0	0	0	0	0	0	1	1	0.051011	10	2	10	10	2	10	2
1	0	83121325	76321241	0	0	1	0	0	0	0	1	982	983.391	10.2	1	0	1	1	1	1	1	13	3	4.3333	0.28723	0	1	0	0	0	0	0	0	0	0	1	1	1	0.081617	16	2	16	16	2	16	2
	0	83121325	76321241	0	0	1	0	0	0	0	1	1457	1459.26	59.5	0	1	1	1	0	1	1	5	2	2.5	0.45745	1	1	0	1	1	0	0	1	0	0	0	1	1	0.035707	7	2	7	7	2	7	2
0	0	26181521	76321241	1	1	1	1	0	0	0	1		977.46		1	0	1	1	0	1	0	3	2	1.5	0.46	0	1	0	0	0	0	0	0	0	0	0	1	1	0.051011	10	2	10	10	2	10	2
0	0	55653431	26454273	1	0	1	1	0	0	1	0	1261	1261.45	70.1	1	0	1	0	0	1	1	9	5	1.8	0.4	0	1	0	0	0	0	0	0	0	0	1	1	1	0.18714	21	3	21	21	3	21	3
0	0	87637754	26454273	1	0	1	1	0	0	1	0		918.462		1	0	1	1	0	1	1	8	4	2	0.4	0	1	0	0	0	0	0	0	0	0	1	1	1	0.18714	21	3	21	21	3	21	3
	0	87637754	26454273	1	1	1	0	0	0	0	1	1720	1729.42	35.1	0	0	0	1	0	1	1	7	3	2.3333	0.41489	0	1	0	1	1	1	0	1	0	0	1	1	2	0.035646	4	27	2	4	27	4	27
1	0	87637754	26454273	1	1		1	1	1	1	0	125	127.19	1	0	0	1	1	0	1	1	8	4	2	0.4	0	1	0	1	0	0	0	0	0	0	1	1	1	0.26735	30	4	30	30	4	30	4
	0	87637754	26454273	1	1		0	0	0	1	0	552	561.42	35.1	0	0	0	1	0	1	1	7	3	2.3333	0.41489	0	1	0	1	1	1	0	1	0	0	1	1	2	0.035646	4	27	2	4	27	4	27
0	0	22372122	26454273	1	1	1	1	1	0	1	0	403	403.47	70.1	1	0	1	0	0	1	1	6	6	1	0.47	0	1	0	0	0	0	0	0	0	0	1	1	1	0.18714	21	3	21	21	3	21	3
1	0	22372122	26454273	1		1	1				0	778	1045.57	1	0	0	1	0	0	1	1	5	2	2.5	0.48936	0	1	0	1	0	0	0	0	0	0	1	1	1	0.26735	30	4	30	30	4	30	4
	0	22372122	26454273	0	0		1	1	1	1	0	79	79.4845	35.1	0	0	0	1	0	1	1	5	2	2.5	0.45745	0	1	0	1	1	1	0	1	0	0	1	1	2	0.035646	4	27	2	4	27	4	27
	0	22372122	26454273	1	1		1	0	0	0	1	956	1009.67	35.1	0	0	0	1	0	1	1	5	2	2.5	0.45745	0	1	0	1	1	1	0	1	0	0	1	1	2	0.035646	4	27	2	4	27	4	27
0	0	65565563	56777867	1	0	1	0	0	0	1	0	461	461.679	12.9	1	0	0	1	0	1	1	9	3	3	0.33	1	1	0	0	1	0	1	0	0	0	0	1	1	0.055634	15	3	15	15	3	15	3
1	0	65565563	56777867	1	1	1	1	0	0	0	1	811	862.42	1	1	0	0	1	0	1	1	8	3	2.6667	0.39362	1	1	1	0	1	0	1	1	0	0	0	1	1	0.029671	8	2	8	8	2	8	2
0	0	65565563	56777867	0	0	1	0	0	0	1	0		1005.68		1	0	0	1	0	1	1	9	3	3	0.33	1	1	0	0	1	0	1	0	0	0	0	1	1	0.055634	15	3	15	15	3	15	3
1	0	65565563	56777867	0	0	1	1	1	1	0	1	1355	1406.42	1	1	0	0	1	0	1	1	8	3	2.6667	0.39362	1	1	1	0	1	0	1	1	0	0	0	1	1	0.029671	8	2	8	8	2	8	2
	0	65565563	56777867	0		1	1					1978		97.1	0	0	1	1	0	1	1	9	3	3	0.28723	1	1	0	0	1	0	1	1	0	0	0	2	1	0.055634	7.5	1	15	15	2	7.5	1
0	0	58654222	66642622	1	1	1	0	1	0	1	0	377	379.602	25.4	1	0	0	1	0	1	1	3	1	3	0.61	0	1	0	1	1	0	1	0	0	0	1	1	1	0.04657	10	3	10	10	3	10	3
1	0	58654222	66642622	1	1	1	1	0	0	0	1		713.53		0	0	0	0	0	1	1	6	2	3	0.40426	0	1	0	0	1	0	0	1	0	0	0	1	0	0.060541	13	3		13	3	13	3
1	0	26174675	86836312	0	1		1	0	0	0	1	1605	1606.43	0	1	0	1	0	0	1	1	4	2	2	0.41489	1	1	0	1	1	0	0	1	0	0	0	1	0	0.029432	15	5		15	5	15	5
0	0	68674817	86836312											25.4													1			0	0	0	0	0		0	1		0.037281	19	7		19	7	19	7
1	0	58613825	86836312	1	1		1	1	1	1	0	177	176.525	0	1	0	1	0	0	1	1	3	1	3	0.57447	1	1	0	1	1	0	0	1	0	0	0	1	0	0.029432	15	5		15	5	15	5
0	0	15413658	86836312											25.4								3					1			0	0	0	0	0		0	1		0.037281	19	7		19	7	19	7
0	0	67546264	42563683	0	0	1	0	1	1	1	0	155	151.608	12.9	1	0	0	1	0	1	1	10	5	2	0.43	0	1	0	0	0	0	0	0	0	0	0	1	1	0.072251	21	3	21	21	3	21	3
0	0	54738116	42563683	1	1	1	1	1	0	1	0	350	350.616	12.9	1	0	0	1	0	1	0	7	3	2.3333	0.35	0	1	0	0	0	0	0	0	0	0	0	1	1	0.072251	21	3	21	21	3	21	3
1	0	54738116	42563683	1	1	1	0	0	0	0	1	721	721.531	32	0	0	0	1	0	1	0	6	3	2	0.2766	1	1	0	0	1	0	1	1	0	0	0	1	1	0.055048	16	3	16	16	3	16	3
0	0	58486741	64133326	1	1	1	0	0	0	1	0	534	534.54	83	1	0	0	1	0	1	1	5	2	2.5	0.46	0	1	0	1	1	0	0	1	0	1	1	1	0	0.1619	38	5		38	5	38	5
	0	58486741	64133326	0	1		0	0	0	0	1	926	926.371	35.1	0	0	0	0	0	1	1	5	2	2.5	0.43617	0	1	0	1	1	0	0	1	0	0	0	1	0	0.10225	24	6		24	6	24	6
	0	36562424	64133326	1	1		1	1	1	1	0	209	210.374	37.1	0	0	0									0	1	0	1	1	0	0	1	0	0	0	1	0	0.10225	24	6		24	6	24	6
0	0	41835241	64133326	1	1	1	0	1	1	1	0	353	353.557	83	1	0	0	1	0	1	1	7	4	1.75	0.45	0	1	0	1	1	0	0	1	0	1	1	1	0	0.1619	38	5		38	5	38	5
1	0	41835241	64133326	1	1	1	0	0	0	0	1	718	720.652	1	0	0	0	0	1	1	1	13	2	6.5	0.39362	0	1	1	1	1	0	0	1	0	0	1	1	0	0.17042	40	6		40	6	40	6
	0	41835241	64133326	1	1	1	1	0	0	0	1	1131	1132.39	37.1	0	0	0	0	0	1	1	4	2	2	0.52128	0	1	0	1	1	0	0	1	0	0	0	1	0	0.10225	24	6		24	6	24	6
0	0	41835241	64133326	1	1	1	0	0	0	1	0	541	541.561	83	1	0	0	1	0	1	1	7	4	1.75	0.45	0	1	0	1	1	0	0	1	0	1	1	1	0	0.1619	38	5		38	5	38	5
1	0	41835241	64133326	1	0	1	0	0	0	0	1	906	938.466	1	0	0	0	0	1	1	1	13	2	6.5	0.39362	0	1	1	1	1	0	0	1	0	0	1	1	0	0.17042	40	6		40	6	40	6
0	0	41835241	64133326	0	1	1	0	0	0	0	1	1346	1346.57	83	1	0	0	1	0	1	1	7	4	1.75	0.45	0	1	0	1	1	0	0	1	0	1	1	1	0	0.1619	38	5		38	5	38	5
1	0	41835241	64133326	0	0	1	0	0	0	0	1	1711	1743.47	1	0	0	0	0	1	1	1	13	2	6.5	0.39362	0	1	1	1	1	0	0	1	0	0	1	1	0	0.17042	40	6		40	6	40	6
0	0	87474735	72355664	1	1	1	0	0	0	1	0	991	992.49	70.1	1	0	1	1	0	1	1	4	3	1.3333	0.48	0	1	0	0	0	0	0	0	0	0	0	1	2	0.037795	8	3	4	8	3	8	3
	0	87474735	72355664	1		1	0					1969		227.1	0	0	0	1	1	1	1	7	2	3.5	0.30851	0	1	0	0	1	0	0	1	0	1	0	1	2	0.042519	9	3	4.5	9	3	9	3
	0	87474735	72355664	0	1		0	1	0	1	0	98	320.392	59.5	0	0	0	1	1	1	1	7	2	3.5	0.30851	0	1	0	0	1	0	0	1	0	1	0	1	2	0.042519	9	3	4.5	9	3	9	3
	0	87474735	72355664	1	1		0	0	0	0	1	999	1220.39	24.4	0	0	0	1	1	1	1	7	2	3.5	0.30851	0	1	0	0	1	0	0	1	0	1	0	1	2	0.042519	9	3	4.5	9	3	9	3
0	0	83676377	45218475	0	1	1	1	0	0	1	0		891.514		1	0	1	1	0	1	1	3	1	3	0.63	0	0	0	1	1	0	0	1	0	0	1	1	1	0.065811	12	4	12	12	4	12	4
1	0	83676377	45218475	0	0	1	1	0	0	0	1	1265	1301.44	1	0	0	0	1	0	1	1	3	2	1.5	0.6383	0	1	1	0	0	0	0	0	0	1	1	1	1	0.054842	10	3	10	10	3	10	3
	0	83676377	45218475	0	0	1	0	0	0	0	1	1712	1926.36	59.5	0	0	0	1	0	1	1	4	2	2	0.48936	0	1	1	0	0	0	0	0	0	0	1	1	1	0.060327	11	3	11	11	3	11	3
0	0	47176785	45218475	1	1	1	1	0	0	0	0		1163.52		1	0	1	1	0	1	1	3	1	3	0.53	0	0	0	1	1	0	0	1	0	0	1	1	1	0.065811	12	4	12	12	4	12	4
1	0	47176785	45218475	1	1	1	1	0	0	0	1		1573.46		0	0	0	1	0	1	1	4	2	2	0.55319	0	1	1	0	0	0	0	0	0	1	1	1	1	0.054842	10	3	10	10	3	10	3
	0	47176785	45218475	1	0	1	1	0	0	0	1	1985	2198.36	24.4	0	0	0	1	0	1	1	4	2	2	0.48936	0	1	1	0	0	0	0	0	0	0	1	1	1	0.060327	11	3	11	11	3	11	3
0	0	83535653	45218475	0	1	1	0	0	0	1	0	1095	1096.4	70.1	1	0	1	1	0	1	1	4	2	2	0.52	0	0	0	1	1	0	0	1	0	0	1	1	1	0.065811	12	4	12	12	4	12	4
1	0	83535653	45218475	0	1	1	0	0	0	0	1	1469	1520.27	1	0	0	0	1	0	1	1	3	2	1.5	0.5	0	1	1	0	0	0	0	0	0	1	1	1	1	0.054842	10	3	10	10	3	10	3
0	0	46461543	71635243	0	1	1	0	0	0	1	0	580	580.562	12.9	1	1	1	1	0	1	0	6	3	2	0.28	1	1	0	1	1	0	0	1	0	0	0	1	1	0.08655	12	4	12	12	4	12	4
1	0	46461543	71635243	0	0	1	0	0	0	0	1	938	1213.99	1	1	0	0	1	1	1	0	9	2	4.5	0.25532	1	1	1	0	0	0	0	0	0	0	0	1	1	0.1154	16	4	16	16	4	16	4
	0	46461543	71635243	0	1	1	0	0	0	0	1	1372	1375.55	42.2	0	0	1	1	1	1	0	10	3	3.3333	0.29787	1	1	0	0	0	0	0	0	0	0	0	2	1	0.12982	9	2	18	18	4	9	2
1	0	21733343	71635243	0	1		0	0	0	1	0	1259	1298.51	1	1	0	0	1	0	1	1	5	2	2.5	0.48936	1	1	1	0	0	0	0	0	0	0	0	1	1	0.1154	16	4	16	16	4	16	4
1	0	21733343	71635243	0	1		0	0	0	0	1		1633.52		1	0	0	1	0	1	1	5	2	2.5	0.48936	1	1	1	0	0	0	0	0	0	0	0	1	1	0.1154	16	4	16	16	4	16	4
0	0	76843447	57645687	0	0	1	0	0	0	0	1			12.9	1	0	0	1	0	1	1	7	4	1.75	0.45	0	1	0	1	1	0	0	1	0	1	1	1	3	0.070813	31	8	10.3333	31	8	31	8
0	0	76843447	57645687		0	1	0	0	0	0	0	1660	1660.48	12.9	1	0	0	1	0	1	1	7	4	1.75	0.45	0	1	0	1	1	0	0	1	0	1	1	1	3	0.070813	31	8	10.3333	31	8	31	8
0	0	76843447	57645687	1		1	0	0	0	0	0	1448	1451.49	12.9	1	0	0	1	0	1	1	7	4	1.75	0.45	0	1	0	1	1	0	0	1	0	1	1	1	3	0.070813	31	8	10.3333	31	8	31	8
	0	76843447	57645687	1	0	1	0	0	0	0	1	2398	2243.49	363.2	0	0	1	1	0	1	1	12	5	2.4	0.55319	0	1	0	0	0	0	0	0	0	0	1	2	1	0.070813	15.5	3	31	31	6	15.5	3
1	0	76843447	57645687	0	1		0	1	0	1	0	170	168.4	35	0	0	0	1	0	1	1	13	5	2.6	0.55319	0	1	0	0	1	0	0	1	0	0	1	1	8	0.061676	27	6	3.375	27	6	27	6
	0	76843447	57645687	0	1		0	0	0	0	1	728	573.477	363.2	0	0	1	1	0	1	1	12	5	2.4	0.55319	0	1	0	0	0	0	0	0	0	0	1	2	1	0.070813	15.5	3	31	31	6	15.5	3
0	0	43622586	57645687	1		1	1	1	1	1	0	69	69.5303	12.9	1	0	1	1	0	1	0	4	2	2	0.41	0	1	0	1	1	0	0	1	0	1	1	1	3	0.070813	31	8	10.3333	31	8	31	8
1	0	43622586	57645687	1	1	1	1	0	0	0	1		464.49		0	0	0	1	0	1	0	4	2	2	0.29787	0	1	0	0	1	0	0	1	0	0	1	1	8	0.061676	27	6	3.375	27	6	27	6
0	0	43622586	57645687	0	0	1	1	0	0	0	1	1314	1315.54	12.9	1	0	1	1	0	1	0	4	2	2	0.41	0	1	0	1	1	0	0	1	0	1	1	1	3	0.070813	31	8	10.3333	31	8	31	8
1	0	43622586	57645687	0	1	1	1	0	0	0	1		1710.49		0	0	0	1	0	1	0	4	2	2	0.29787	0	1	0	0	1	0	0	1	0	0	1	1	8	0.061676	27	6	3.375	27	6	27	6
0	0	56671731	57645687	0	1	1	1	1	0	1	0	245	244.503	12.9	1	0	0	1	1	1	1	8	2	4	0.42	0	1	0	1	1	0	0	1	0	1	1	1	3	0.070813	31	8	10.3333	31	8	31	8
1	0	56671731	57645687	0	1	1	0	0	0	0	1	636	634.386	35	0	0	0	1	1	1	1	13	2	6.5	0.3617	0	1	0	0	1	0	0	1	0	0	1	1	8	0.061676	27	6	3.375	27	6	27	6
	0	56671731	57645687	0	0	1	0	0	0	0	1	1207	1040.46	218.2	0	0	1	1	1	1	1	9	2	4.5	0.39362	0	1	0	0	0	0	0	0	0	0	1	2	1	0.070813	15.5	3	31	31	6	15.5	3
0	0	56671731	57645687	1	0	1	0	0	0	1	0	682	685.483	12.9	1	0	0	1	1	1	1	8	2	4	0.42	0	1	0	1	1	0	0	1	0	1	1	1	3	0.070813	31	8	10.3333	31	8	31	8
1	0	56671731	57645687	1	1	1	0	0	0	0	1	1275	1072.39	148.1	0	0	0	1	1	1	1	13	2	6.5	0.3617	0	1	0	0	1	0	0	1	0	0	1	1	8	0.061676	27	6	3.375	27	6	27	6
	0	35757434	34768373	0	0		0	0	0	1	0	894	895.311	24.4	1	0	0	1	1	1	1	10	2	5	0.3617	0	1	0	0	1	1	0	1	0	0	1	1	0	0.025034	12	2		12	2	12	2
0	0	66666866	34768373	1	1	1	0	0	0	1	0		801.468		1	0	1	1	0	1	1	5	2	2.5	0.39	0	1	0	0	0	0	0	0	0	0	1	1	1	0.02712	13	4	13	13	4	13	4
0	0	66666866	34768373	1	1	1	0	0	0	1	0	1036	1036.47	70.1	1	0	1	1	0	1	1	5	2	2.5	0.39	0	1	0	0	0	0	0	0	0	0	1	1	1	0.02712	13	4	13	13	4	13	4
1	0	66666866	34768373	1	0	1	0	0	0	0	1	1463	1463.31	0	0	0	0	0	0	1	1	4	2	2	0.40426	0	1	0	0	1	1	0	1	0	0	1	1	1	0.02712	13	3	13	13	3	13	3
0	0	71865343	46268546	1	1	1	1	1	0	1	0		397.643		1	0	0	0	0	1	1	12	4	3	0.36	0	1	0	0	0	0	0	0	0	0	1	1	1	0.043432	15	5	15	15	5	15	5
1	0	71865343	46268546	1	1	1	1	0	0	0	1		771.374		0	0	0	1	0	1	1	3	2	1.5	0.60638	0	1	1	1	1	0	0	1	0	1	0	1	1	0.034746	12	5	12	12	5	12	5
	0	71865343	46268546	1	1	1	1	0	0	0	1		1185.33		0	0	0	1	0	1	1	3	2	1.5	0.60638	0	1	0	0	1	1	0	1	0	1	0	1	3	0.052119	18	7	6	18	7	18	7
1	0	23544444	46268546	0	0		1	0	0	0	1	1569	1599.51	35	0	0	0	1	0	1	0	5	3	1.6667	0.35106	0	1	1	1	1	0	0	1	0	1	0	1	1	0.034746	12	5	12	12	5	12	5
	0	23544444	46268546	0	1		1	0	0	0	1	1963	2206.4	37.1	0	0	0	1	0	1	1	5	3	1.6667	0.51064	0	1	0	0	1	1	0	1	0	1	0	1	3	0.052119	18	7	6	18	7	18	7
	0	23544444	46268546	1	1		1	1	0	1	0	274	517.391	37.1	0	0	0	1	0	1	1	5	3	1.6667	0.51064	0	1	0	0	1	1	0	1	0	1	0	1	3	0.052119	18	7	6	18	7	18	7
1	0	76846865	46268546	1	0		1	0	0	1	0	452	451.387	35	0	0	0	1	0	1	1	4	2	2	0.48936	0	1	1	1	1	0	0	1	0	1	0	1	1	0.034746	12	5	12	12	5	12	5
1	0	76846865	46268546	0	0		1	0	0	0	1		1518.4		0	0	0	1	0	1	1	4	2	2	0.48936	0	1	1	1	1	0	0	1	0	1	0	1	1	0.034746	12	5	12	12	5	12	5
	0	31288582	46268546	1			1					625	868.424	37.1	0	0	0	1	0	1	1	2	2	1	0.48936	0	1	0	0	1	1	0	1	0	1	0	1	3	0.052119	18	7	6	18	7	18	7
0	0	15863782	48848631	1	1	1	1	1	0	1	0	335	335.363	70.1	1	0	0	1	0	1	1	9	3	3	0.43	0	1	0	0	1	0	0	1	0	1	0	1	0	0.13919	21	3		21	3	21	3
1	0	15863782	48848631	1	0	1	0	0	0	1	0	706	706.355	1	1	0	1	0	0	1	1	8	3	2.6667	0.24468	0	0	1	1	1	0	0	1	0	0	0	1	0	0.099421	15	3		15	3	15	3
	0	15863782	48848631	1	1	1	0	0	0	0	1	1119	1122.35	2	1	0	1	0	0	1	1	8	3	2.6667	0.24468	0	1	0	1	0	0	0	0	0	0	0	1	0	0.15907	24	3		24	3	24	3
0	0	82133613	67452371	1	0	1	0	0	0	1	0		862.423		1	0	1	1	0	1	1	8	3	2.6667	0.33	1	1	0	0	1	0	1	0	0	0	0	1	1	0.048974	12	3	12	12	3	12	3
1	0	82133613	67452371	1	0	1	1	0	0	0	1	1289	1288.59	0	1	0	0	1	0	1	1	8	3	2.6667	0.55319	1	1	1	1	0	0	0	0	0	1	0	1	1	0.065299	16	3	16	16	3	16	3
0	0	74831282	67452371	0	0	1	1	1	0	1	0	120	120.429	70.1	1	0	1	1	0	1	1	3	2	1.5	0.63	1	1	0	0	1	0	1	0	0	0	0	1	1	0.048974	12	3	12	12	3	12	3
1	0	74831282	67452371	0	1	1	1	0	0	1	0	496	497.273	1	1	0	0	1	0	1	1	5	2	2.5	0.45745	1	1	1	1	0	0	0	0	0	1	0	1	1	0.065299	16	3	16	16	3	16	3
0	0	23188168	67452371	1	0	1	1	1	0	1	0	336	336.439	70.1	1	0	1	1	0	1	1	3	2	1.5	0.63	1	1	0	0	1	0	1	0	0	0	0	1	1	0.048974	12	3	12	12	3	12	3
1	0	23188168	67452371	1	0		1	0	0	1	0	684	685.291	1	1	0	0	1	0	1	1	3	2	1.5	0.60638	1	1	1	1	0	0	0	0	0	1	0	1	1	0.065299	16	3	16	16	3	16	3
0	0	75526834	28667176	0	1	1	1	0	0	1	0	1038	1038.4	70.1	1	0	0	0	0	1	0	2	1	2	0.51	0	1	0	0	1	1	0	0	1	0	0	1	0	0.043289	14	4		14	4	14	4
1	0	75526834	28667176	0		1	1					1631		196.8	1	1	0	0	0	1	0	2	1	2	0.51	1	1	1	0	1	1	0	0	0	0	0	1	0	0.027828	9	3		9	3	9	3
	0	75526834	28667176	0	1	1	0	0	0	0	1	1827	1822.37	37.1	1	1	0	0	0	1	1	3	2	1.5	0.60638	1	1	0	0	1	1	0	1	0	1	0	1	0	0.034013	11	4		11	4	11	4
	0	75526834	28667176	0	1		0	1	0	1	0	405	406.374	2	1	1	0	0	0	1	1	3	2	1.5	0.60638	1	1	0	0	1	1	0	1	0	1	0	1	0	0.034013	11	4		11	4	11	4
	0	18142332	28667176	0	1		0	0	0	0	1	861	861.331	2	1	1	0	0	0	1	1	3	2	1.5	0.60638	1	1	0	0	1	1	0	1	0	1	0	1	0	0.034013	11	4		11	4	11	4
0	0	87756114	16525821	1	1	1	0	0	0	0	1	820	820.418	12.9	1	0	0	1	0	1	1	2	2	1	0.56	0	1	0	1	0	0	0	0	0	1	1	1	0	0.23322	10	3		10	3	10	3
1	0	87756114	16525821	1	1	1	1	0	0	0	1	1194	1194.35	35	0	0	0	0	0	1	1	2	2	1	0.57447	0	1	0	0	1	0	0	1	0	0	1	1	0	0.093288	4	3		4	3	4	3
	0	38485777	16525821	1	0		0	1	0	1	0		440.329		0	0	0	0	0	1	1	4	3	1.3333	0.52128	0	1	0	0	1	1	0	1	0	1	1	1	0	0.32651	14	3		14	3	14	3
0	0	55146822	13745782	0	1	1	1	0	0	1	0	498	498.475	70.1	1	0	1	0	0	1	1	5	2	2.5	0.39	0	1	0	1	1	0	0	1	0	1	1	1	0	0.16493	15	3		15	3	15	3
1	0	55146822	13745782	0	1	1	1	0	0	0	1	875	877.291	1	1	0	1	0	0	1	1	5	3	1.6667	0.43617	0	1	0	0	1	0	0	1	0	0	1	1	0	0.20891	19	5		19	5	19	5
	0	55146822	13745782	0	1	1	1	0	0	0	1	1286	1353.68	37.1	0	0	0	0	0	1	1	5	3	1.6667	0.43617	0	1	0	0	1	0	0	1	0	0	0	1	0	0.15393	14	5		14	5	14	5
0	0	13748167	13745782	1	1	1	1	1	1	1	0	77	78.3908	70.1	1	0	0	1	1	1	1	4	1	4	0.41	0	1	0	1	1	0	0	1	0	1	1	1	0	0.16493	15	3		15	3	15	3
0	0	75662522	13745782	1	1	1	0	1	0	1	0	316	316.497	70.1	1	0	0	0	0	1	1	5	2	2.5	0.42	0	1	0	1	1	0	0	1	0	1	1	1	0	0.16493	15	3		15	3	15	3
1	0	75662522	13745782	1	1	1	1	0	0	0	1	693	695.283	1	1	0	1	0	0	1	1	5	3	1.6667	0.45745	0	1	0	0	1	0	0	1	0	0	1	1	0	0.20891	19	5		19	5	19	5
	0	75662522	13745782	1	1	1	0	0	0	0	1	1104	1171.36	37.1	0	0	0	0	0	1	1	4	2	2	0.52128	0	1	0	0	1	0	0	1	0	0	0	1	0	0.15393	14	5		14	5	14	5
0	0	25732845	16781873	0	1	1	1	0	0	1	0		892.402		1	0	0	1	0	1	1	6	2	3	0.47	0	1	0	1	0	0	0	0	0	1	1	1	0	0.10925	25	6		25	6	25	6
1	0	25732845	16781873	0	1	1	1	0	0	0	1		1271.49		1	0	1	0	1	1	1	7	2	3.5	0.38298	0	1	0	1	1	0	0	1	0	0	0	1	0	0.11362	26	7		26	7	26	7
	0	25732845	16781873	0	1	1	1	0	0	0	1	1674	1673.56	2	1	0	1	0	0	1	1	6	2	3	0.46809	0	1	0	1	1	0	0	1	0	0	0	1	0	0.10051	23	5		23	5	23	5
	0	25732845	16781873	0	1		1	1	0	1	0	467	467.56	2	1	0	1	0	0	1	1	6	2	3	0.46809	0	1	0	1	1	0	0	1	0	0	0	1	0	0.10051	23	5		23	5	23	5
0	0	41776527	16781873	0	1	1	1	0	0	1	0		954.39		1	0	0	1	0	1	0	6	2	3	0.4	0	1	0	1	0	0	0	0	0	1	1	1	0	0.10925	25	6		25	6	25	6
0	0	85327423	16781873	1	1	1	1	1	0	1	0	296	296.55	70.1	1	0	0	1	0	1	1	5	2	2.5	0.49	0	1	0	1	0	0	0	0	0	1	1	1	0	0.10925	25	6		25	6	25	6
1	0	85327423	16781873	1	1	1	1	0	0	0	1	666	676.509	1	1	0	1	0	1	1	1	7	2	3.5	0.38298	0	1	0	1	1	0	0	1	0	0	0	1	0	0.11362	26	7		26	7	26	7
	0	85327423	16781873	1		1	1					1128		36.4	1	0	1	0	1	1	1	7	2	3.5	0.38298	0	1	0	1	1	0	0	1	0	0	0	1	0	0.10051	23	5		23	5	23	5
0	0	85327423	16781873	0	1	1	1	0	0	1	0	825	825.556	70.1	1	0	0	1	0	1	1	5	2	2.5	0.49	0	1	0	1	0	0	0	0	0	1	1	1	0	0.10925	25	6		25	6	25	6
1	0	85327423	16781873	0	1	1	1	0	0	0	1	1195	1205.52	1	1	0	1	0	1	1	1	7	2	3.5	0.38298	0	1	0	1	1	0	0	1	0	0	0	1	0	0.11362	26	7		26	7	26	7
1	0	85327423	16781873	1	1		1	1	0	1	0	220	230.524	1	1	0	1	0	1	1	1	7	2	3.5	0.38298	0	1	0	1	1	0	0	1	0	0	0	1	0	0.11362	26	7		26	7	26	7
	0	85327423	16781873	1			1					683		36.4	1	0	1	0	1	1	1	7	2	3.5	0.38298	0	1	0	1	1	0	0	1	0	0	0	1	0	0.10051	23	5		23	5	23	5
	0	27617615	16781873	0			0							36.4	1	0	1	0	0	1	1	3	2	1.5	0.41489	0	1	0	1	1	0	0	1	0	0	0	1	0	0.10051	23	5		23	5	23	5
1	0	67836271	16781873	0	1		0	1	1	1	0	268	278.501	1	1	0	1	0	0	1	0	3	1	3	0.38298	0	1	0	1	1	0	0	1	0	0	0	1	0	0.11362	26	7		26	7	26	7
	0	67836271	16781873	0	1		0	0	0	0	1	681	681.569	2	1	0	1	0	0	1	0	3	2	1.5	0.38298	0	1	0	1	1	0	0	1	0	0	0	1	0	0.10051	23	5		23	5	23	5
0	0	81534357	63185575	1	1	1	0	0	0	0	0		1055.6		0	0	0	1	0	1	1	3	2	1.5	0.63	0	1	0	1	1	1	1	0	0	1	0	1	1	0.038973	12	4	12	12	4	12	4
0	0	24253114	88471836		1	1	1	1	0	1	0		497.459		1	0	0	1	0	1	1	6	4	1.5	0.5	0	0	0	0	1	0	0	1	0	1	1	1	1	0.17954	14	3	14	14	3	14	3
	0	24253114	88471836		0	1	1	0	0	0	1	1278	1279.39	2	0	0	0	1	0	1	1	6	3	2	0.46809	0	1	0	0	1	0	1	1	0	0	0	2	1	0.15389	6	1.5	12	12	3	6	1.5
0	0	47625154	24585428	0	0	1	0	0	0	0	1	1322	1322.62	83	1	0	1	1	0	1	1	5	2	2.5	0.49	1	1	0	1	1	0	0	1	0	1	1	1	1	0.03436	9	2	9	9	2	9	2
0	0	47625154	24585428	1	0	1	0	0	0	1	0		308.621		1	0	1	1	0	1	1	5	2	2.5	0.49	1	1	0	1	1	0	0	1	0	1	1	1	1	0.03436	9	2	9	9	2	9	2
1	0	47625154	24585428	1	0		1	0	0	0	1	1134	1135.34	0	0	1	1	1	1	1	1	8	2	4	0.3617	1	1	1	0	1	0	0	1	0	0	0	1	1	0.061085	16	3	16	16	3	16	3
0	0	53328537	24585428	0	1	1	1	0	0	1	0	612	612.63	83	1	0	1	1	0	1	1	5	2	2.5	0.49	1	1	0	1	1	0	0	1	0	1	1	1	1	0.03436	9	2	9	9	2	9	2
1	0	53328537	24585428	0	1	1	1	0	0	0	1	987	987.329	0	0	1	1	1	0	1	1	4	2	2	0.55319	1	1	1	0	1	0	0	1	0	0	0	1	1	0.061085	16	3	16	16	3	16	3
1	0	12564885	24585428	1	1		1	1	0	1	0	219	217.389	0	0	1	1	1	0	1	1	4	2	2	0.55319	1	1	1	0	1	0	0	1	0	0	0	1	1	0.061085	16	3	16	16	3	16	3
0	0	16184158	36618434	1	1	1	0	1	0	1	0	172	172.66	25.4	0	0	1	0	1	1	1	5	1	5	0.44		1			0	0	0	0	0		1	1		0.0082781	17	3		17	3	17	3
1	0	16184158	36618434	1		1	0					723		194.3	0	0	1	0	1	1	1	5	1	5	0.44	1	1	0	1	1	0	0	1	0	0	1	1	0	0.0097389	20	6		20	6	20	6
	0	16184158	36618434	1	1	1	0	0	0	0	0	1089	955.433	218.2	0	0	1	0	1	1	1	7	2	3.5	0.2766	1	1	1	0	0	0	0	0	0	0	0	1	0	0.0077911	16	5		16	5	16	5
0	0	16184158	36618434		1	1	0	0	0	0	1		1245.67		0	0	1	0	1	1	1	5	1	5	0.44		1			0	0	0	0	0		1	1		0.0082781	17	3		17	3	17	3
	0	16184158	36618434		1	1	0	0	0	0	1		2028.44		0	0	1	0	1	1	1	7	2	3.5	0.2766	1	1	1	0	0	0	0	0	0	0	0	1	0	0.0077911	16	5		16	5	16	5
0	0	57531318	36618434	1	1	1	0	0	0	1	0		913.938		1	0	0	0	0	1	1	5	2	2.5	0.57		1			0	0	0	0	0		1	1		0.0082781	17	3		17	3	17	3
	0	57531318	36618434	1	1	1	1	0	0	0	1	1830	1696.45	218.2	0	0	1	0	0	1	1	4	2	2	0.48936	1	1	1	0	0	0	0	0	0	0	0	1	0	0.0077911	16	5		16	5	16	5
0	0	74216645	36618434	1	1	1	1	1	0	1	0	365	365.672	25.4	1	0	0	0	0	1	1	5	2	2.5	0.44		1			0	0	0	0	0		1	1		0.0082781	17	3		17	3	17	3
1	0	74216645	36618434	1	1	1	1	0	0	1	0	733	735.532	0	0	0	1	0	0	1	1	5	2	2.5	0.38298	1	1	0	1	1	0	0	1	0	0	1	1	0	0.0097389	20	6		20	6	20	6
0	0	65223285	85372842	1	0	1	0	1	1	1	0	783	778.481	25.4	0	0		1	0	1	0	6	2	3	0.4	0	1	0	1	0	0	0	0	0	1	0	1	0	0.058369	7	2		7	2	7	2
1	0	65223285	85372842	1	1	1	1	0	0	0	1	1329	1151.41	194.3	1	0	0	0	1	0	0	8	2	4	0.19149	0	1	0	1	1	0	0	1	0	0	0	1	1	0.18345	22	4	22	22	4	22	4
	0	65223285	85372842	1	1	1	0	0	0	0	1	1546	1567.35	36.4	0	0	0	1	1	1	0	7	2	3.5	0.30851	0	1	0	1	1	0	0	1	0	0	0	1	2	0.1084	13	3	6.5	13	3	13	3
0	0	65223285	85372842	1	1	1	0	0	0	0	1	1270	1270.5	25.4	0	0		1	0	1	0	6	2	3	0.4	0	1	0	1	0	0	0	0	0	1	0	1	0	0.058369	7	2		7	2	7	2
1	0	65223285	85372842	1	0	1	1	0	0	0	1		1643.42		1	0	0	0	1	0	0	8	2	4	0.19149	0	1	0	1	1	0	0	1	0	0	0	1	1	0.18345	22	4	22	22	4	22	4
	0	65223285	85372842	1	1	1	0	0	0	0	1		2059.36		0	0	0	1	1	1	0	7	2	3.5	0.30851	0	1	0	1	1	0	0	1	0	0	0	1	2	0.1084	13	3	6.5	13	3	13	3
1	0	65223285	85372842	0	1		1	1	0	1	0		284.419		1	0	0	0	1	0	0	8	2	4	0.19149	0	1	0	1	1	0	0	1	0	0	0	1	1	0.18345	22	4	22	22	4	22	4
	0	65223285	85372842	0	1		1	0	0	0	1	679	700.361	36.4	0	0	0	1	1	1	0	7	2	3.5	0.30851	0	1	0	1	1	0	0	1	0	0	0	1	2	0.1084	13	3	6.5	13	3	13	3
0	0	31344215	27854433		1	1	0	0	0	1	0	764	765.385	25.4	0	0	1	1	0	1	0	4	2	2	0.43	0	0	0	1	1	1	0	1	0	0	0	1	1	0.055195	10	3	10	10	3	10	3
1	0	31344215	27854433	1	1		0	1	0	1	0	321	321.49	0	1	0	1	1	0	1	0	5	2	2.5	0.38298	0	1	0	0	1	0	0	1	0	0	0	1	1	0.066234	12	3	12	12	3	12	3
	0	31344215	27854433	1	1		0	0	0	0	1	884	927.282	105	1	0	1	1	0	1	0	5	2	2.5	0.35106	0	1	0	0	1	0	0	1	0	0	0	1	1	0.066234	12	3	12	12	3	12	3
1	0	31344215	27854433	0	1		0	0	0	0	1	1350	1350.5	0	1	0	1	1	0	1	0	5	2	2.5	0.38298	0	1	0	0	1	0	0	1	0	0	0	1	1	0.066234	12	3	12	12	3	12	3
	0	31344215	27854433	0	1		0	0	0	0	1	1750	1956.29	36.4	1	0	1	1	0	1	0	5	2	2.5	0.35106	0	1	0	0	1	0	0	1	0	0	0	1	1	0.066234	12	3	12	12	3	12	3
1	0	84233557	61136866	0	1		1	1	0	1	0		325.506		0	0	1	1	1	1	1	12	2	6	0.39362	0	1	1	1	1	0	0	1	0	0	1	1	2	0.093979	21	4	10.5	21	4	21	4
	0	84233557	61136866	0	1		0	0	0	0	1	748	748.32	35.1	1	0	0	1	0	1	1	10	4	2.5	0.37234	0	1	0	1	1	0	0	1	0	0	0	1	1	0.067128	15	3	15	15	3	15	3
0	0	22566561	61136866	1	1	1	1	0	0	0	1		1112.6		1	0	1	0	0	1	1	3	2	1.5	0.63	0	1	0	1	0	0	0	0	0	0	0	1	2	0.089504	20	4	10	20	4	20	4
1	0	22566561	61136866	1	1	1	1	0	0	0	1	1482	1482.54	0	0	0	1	1	1	1	0	5	1	5	0.23404	0	1	1	1	1	0	0	1	0	0	1	1	2	0.093979	21	4	10.5	21	4	21	4
	0	22566561	61136866	1	0	1	0	0	0	0	1	1905	1912.52	35.1	1	0	0	0	1	0	0	4	1	4	0.26596	0	1	0	1	1	0	0	1	0	0	0	1	1	0.067128	15	3	15	15	3	15	3
0	0	45656217	64713365	1	1	1	1	0	0	1	0	426	425.524	24.9	1	0	1	0	0	1	1	4	2	2	0.48	0	1	0	0	0	0	0	0	0	0	0	1	0	0.045599	10	3		10	3	10	3
1	0	45656217	64713365	1	1	1	0	0	0	0	1	865	795.587	94.5	1	0	0	0	0	1	0	4	2	2	0.44681	0	1	1	0	1	0	0	1	0	0	0	1	0	0.045599	10	3		10	3	10	3
	0	45656217	64713365	1		1	0					1205		29.3	1	0	0	0	0	1	0	4	2	2	0.44681	0	1	0	0	0	0	0	0	0	0	0	1	1	0.0091198	2	2	2	2	2	2	2
0	0	43112388	64713365	0	0	1	1	1	0	1	0	391	390.543	24.9	1	0	1	0	0	1	1	5	2	2.5	0.42	0	1	0	0	0	0	0	0	0	0	0	1	0	0.045599	10	3		10	3	10	3
	0	72871415	64713365											20	1	0	0	0				1				0	1	0	0	0	0	0	0	0	0	0	1	1	0.0091198	2	2	2	2	2	2	2
0	0	71855238	11182221	1	1	1	0	0	0	1	0	885	885.451	83	1	0	0	1	0	1	0	3	2	1.5	0.46	0	1	0	1	0	0	0	0	0	1	1	1	0	0.10799	16	5		16	5	16	5
0	0	38873222	11182221	0	1	1	1	0	0	1	0		679.371		1	0	0	1	0	1	1	5	2	2.5	0.39	0	1	0	1	0	0	0	0	0	1	1	1	0	0.10799	16	5		16	5	16	5
1	0	38873222	11182221	0	1	1	0	0	0	0	1	1045	1046.37	0	0	0	0	0	0	1	1	6	2	3	0.40426	0	1	0	1	1	0	0	1	0	1	1	1	0	0.087741	13	3		13	3	13	3
	0	38873222	11182221	0	1	1	1	0	0	0	1	1641	1462.39	227.1	0	0	0	0	0	1	1	6	2	3	0.40426	0	1	0	0	1	0	0	1	0	0	0	1	0	0.080991	12	3		12	3	12	3
0	0	53584552	61751277	0	1	1	1	1	1	1	0	127	127.475	83	1	0	0	0	0	1	1	5	3	1.6667	0.49	0	1	0	1	0	0	0	0	0	0	1	1	0	0.061059	12	6		12	6	12	6
1	0	53584552	61751277	0	1	1	1	0	0	1	0		494.423		0	0	0	0	0	1	1	3	2	1.5	0.57447	0	1	0	0	1	0	0	1	0	0	1	1	0	0.05597	11	5		11	5	11	5
	0	53584552	61751277	0	0	1	0	0	0	0	0	957	1153.34	29.3	0	0	1	0	0	1	1	4	3	1.3333	0.55319	0	1	1	0	0	0	0	0	0	1	1	1	0	0.045794	9	3		9	3	9	3
	0	37846624	61751277												0	0	1									0	1	1	0	0	0	0	0	0	1	1	1	0	0.045794	9	3		9	3	9	3
0	0	27587151	28168827	0	0	1	0	1	0	1	0	417	418.903	12.9	1	0	1	1	0	1	1	5	4	1.25	0.57	1	1	0	1	1	0	0	1	0	1	1	1	3	0.076288	28	4	9.3333	28	4	28	4
1	0	27587151	28168827	0	1	1	0	0	0	1	0	790	789.504	32	1	0	0	1	0	1	1	11	5	2.2	0.39362	1	1	1	0	1	0	0	1	0	0	1	1	3	0.084461	31	5	10.3333	31	5	31	5
	0	27587151	28168827	0	1	1	0	0	0	0	1	1230	1225.52	36.4	0	0	0	1	0	1	1	13	5	2.6	0.55319	1	1	0	0	1	0	0	1	0	0	1	1	3	0.065389	24	5	8	24	5	24	5
	0	27587151	28168827	0	1		0	1	0	1	0	94	94.5357	31.3	0	0	0	1	0	1	1	13	5	2.6	0.55319	1	1	0	0	1	0	0	1	0	0	1	1	3	0.065389	24	5	8	24	5	24	5
	0	27587151	28168827	0	1		1	1	0	1	0	352	352.53	31.3	0	0	0	1	0	1	1	13	5	2.6	0.55319	1	1	0	0	1	0	0	1	0	0	1	1	3	0.065389	24	5	8	24	5	24	5
0	0	13514125	28168827	1	1	1	1	1	0	1	0	148	149.907	12.9	1	0	1	1	1	1	1	13	4	3.25	0.43	1	1	0	1	1	0	0	1	0	1	1	1	3	0.076288	28	4	9.3333	28	4	28	4
	0	13514125	28168827	1		1	1					957		31.3	0	0	0	1	1	1	1	10	3	3.3333	0.39362	1	1	0	0	1	0	0	1	0	0	1	1	3	0.065389	24	5	8	24	5	24	5
0	0	13514125	28168827	1	0	1	1	1	0	1	0	355	356.91	12.9	1	0	1	1	1	1	1	13	4	3.25	0.43	1	1	0	1	1	0	0	1	0	1	1	1	3	0.076288	28	4	9.3333	28	4	28	4
1	0	13514125	28168827	1	1	1	1	0	0	0	0	727	978.01	0	1	0	0	1	1	1	1	13	4	3.25	0.39362	1	1	1	0	1	0	0	1	0	0	1	1	3	0.084461	31	5	10.3333	31	5	31	5
	0	13514125	28168827	1	1	1	0	0	0	0	1	1336	1166.38	97.1	0	0	0	1	1	1	1	10	3	3.3333	0.39362	1	1	0	0	1	0	0	1	0	0	1	1	3	0.065389	24	5	8	24	5	24	5
	0	48642417	28168827	1	1		0	1	0	1	0		278.39		0	0	0									1	1	0	0	1	0	0	1	0	0	1	1	3	0.065389	24	5	8	24	5	24	5
1	0	18542443	28168827	1	0		0	0	0	0	1	1006	1006.36	32	1	0	0	1	0	1	1	3	2	1.5	0.60638	1	1	1	0	1	0	0	1	0	0	1	1	3	0.084461	31	5	10.3333	31	5	31	5
	0	18542443	28168827	1	1		1	0	0	0	1	1446	1444.36	36.4	0	0	0	1	0	1	1	3	3	1	0.60638	1	1	0	0	1	0	0	1	0	0	1	1	3	0.065389	24	5	8	24	5	24	5
0	0	31778244	23687845	1	1	1	1	0	0	1	0	614	614.581	12.9	1	0	0	1	0	1	1	2	1	2	0.7	1	1	0	1	1	0	0	1	0	1	1	2	1	0.040014	4.5	2.5	9	9	5	4.5	2.5
[truncated: 928 more rows]
