# Supplementary material for: Effects of an urban sanitation intervention on childhood enteric infection and diarrhea in Maputo, Mozambique: A controlled before-and-after trial
Source: eLife. 2021 Apr 9;10:e62278. doi: 10.7554/eLife.62278 (PMC8121544; doi:10.7554/eLife.62278)
Supplement: Table 3—source data 1. [file elife-62278-table3-data1.xlsx]

## Sheet: Sheet1
compID	age_days	age_sampDays	studyArm_binary	phase_ml_analysis	phase_m24_analysis	female	povNormal	carerEDU	bl_hh_drophole_cover	bl_hh_drinkwat_binary	bornIn	gpp_prim_noSal	gpp_bac_noSal	gpp_shig	gpp_etec	gpp_camp	gpp_cdif	gpp_o157	gpp_stec	gpp_yers	gpp_chol	gpp_par	gpp_giar	gpp_cryp	gpp_enta	gpp_vir	gpp_noro	gpp_aden	gpp_rota	gpp_coInf_noSal	Kkany	KKtrc	Kkasc	kk_coinf	diarrhea
81841384	143.413	142	1	1		1	0.43617	0			1	1	0	0	0	0	0	0	0	0	0	1	0	1	0	0	0	0	0	0					0
81841384	551.255	549	1		1	1	0.38298	0			1	1	0	0	0	0	0	0	0	0	0	1	1	0	0	0	0	0	0	0					0
81841384	1877.39	1639	1		1	1	0.44681	0			0	1	1	1	1	0	0	0	0	0	0	1	1	0	0	0	0	0	0	1					0
81841384	457.43	455	1	1		0	0.46809	0			0	1	0	0	0	0	0	0	0	0	0	1	1	1	0	0	0	0	0	1	0	0	0	0	0
81841384	603.482	540	1	0	0	1	0.34	0	0	1		1	1	1	1	0	0	0	0	0	0	1	1	0	0	1	1	0	0	1	1	0	1	0	0
81841384	1356.51	1351	1		1	1	0.39362	0	0	1	0	1	1	1	1	0	0	0	0	0	0	1	1	0	0	0	0	0	0	1	1	1	1	1	0
81841384	603.485	540	1	0	0	1	0.34	0	0	1		1	1	0	1	0	0	0	0	0	0	1	1	0	0	1	1	1	0	1	0	0	0	0	0
81841384	1356.52	1351	1		1	1	0.39362	0	0	1	0	1	1	1	1	0	0	0	0	0	0	1	1	0	0	0	0	0	0	1	1	1	1	1	0
81841384	875.465		1	0	0	0	0.21	0	0	0																									0
81841384	1344.49	1310	1	1		0	0.25532	0	0	0	0	1	1	0	1	0	1	0	0	0	0	1	1	0	0	1	1	0	0	1	0	0	0	0	0
81841384		1759	1		1	0	0.25532	0	0	0	0	1	1	1	0	0	0	0	0	0	0	1	1	0	0	0	0	0	0	1
81841384	259.473	257	1	1		0	0.25532	1	0	0	1	1	1	0	0	0	1	0	0	0	0	1	1	0	0	1	1	0	0	1	0	0	0	0	0
81841384		801	1		1	0	0.25532	1	0	0	1	0	0	0	0	0	0	0	0	0	0	0	0	0	0	0	0	0	0	0
81841384	233.435	172	1	0	0	0	0.28	1	0	0		0	0	0	0	0	0	0	0	0	0	0	0	0	0	0	0	0	0	0	0	0	0	0	0
81841384	576.432	576	1	1		0	0.32979	1	0	0	0	1	0	0	0	0	0	0	0	0	0	1	1	1	0	0	0	0	0	1	1	1	1	1	1
81841384	985.26	983	1		1	0	0.45745	0	0	0	0	1	0	0	0	0	0	0	0	0	0	1	1	0	0	0	0	0	0	0	0	0	0	0	0
81841384	321.272	319	1		1	0	0.44681	0			1	1	1	1	0	0	0	0	0	0	0	1	1	0	0	0	0	0	0	1	0	0	0	0	0
81841384	135.427	74	1	0	0	1	0.42	0	0	0		1	1	0	1	0	0	0	0	0	0	0	0	0	0	0	0	0	0	0	0	0	0	0	0
81841384	610.462	716	1	1		1	0.38298	1	0	0	0	1	1	0	1	0	0	0	0	0	0	0	0	0	0	0	0	0	0	0	0	0	0	0	0
81841384	887.268	885	1		1	1	0.45745	0	0	0	0	1	1	1	0	0	0	0	0	0	0	1	1	0	0	0	0	0	0	1	1	1	0	0	0
81841384	869.43	808	1	0	0	0	0.54	1	0	0		1	1	1	1	0	0	0	0	0	0	1	1	0	0	1	1	0	0	1	0	0	0	0	0
81841384	1261.49	1262	1	1		0	0.42553	0	0	0	0	1	1	1	1	0	0	0	0	0	0	1	1	0	0	0	0	0	0	1	1	1	0	0	0
81841384	1613.4	1239	1		1	0	0.47872	0	0	0	0	1	1	1	0	0	0	0	0	0	0	1	1	0	0	0	0	0	0	1	1	1	0	0	0
81841384	1205.35	831	1		1	1	0.60638	0			1	1	0	0	0	0	0	0	0	0	0	1	1	0	0	0	0	0	0	0	0	0	0	0	0
81841384	1311.45	1310	1	1		0	0.39362	0			0	1	1	1	0	0	0	0	0	0	0	1	1	0	0	0	0	0	0	1					0
81841384	2092.36	1717	1		1	0	0.41489	0			0	1	1	1	0	0	0	0	0	0	0	0	0	0	0	1	1	0	0	1	1	1	1	1	0
81841384	1471.45	1092	1		1	0	0.45745	0			0	1	1	1	0	0	0	0	0	0	0	1	1	0	0	0	0	0	0	1	1	1	0	0	0
36868786	762.492	377	1		1	0	0.52128	1			1	0	0	0	0	0	0	0	0	0	0	0	0	0	0	0	0	0	0	0					0
36868786	536.393	478	1	0	0	1	0.46	1	1	1		1	1	0	1	0	0	0	0	0	0	1	1	0	0	0	0	0	0	1	0	0	0	0	0
36868786	889.267	932	1	1		1	0.43617	1	1	1	0	1	0	0	0	0	0	0	0	0	0	1	1	0	0	0	0	0	0	0	0	0	0	0	0
36868786	1283.27	1282	1		1	1	0.48936	0	1	1	0	1	1	1	1	0	0	0	0	0	0	1	1	0	0	0	0	0	0	1	0	0	0	0	0
36868786	1222.4	1165	1	0	0	0	0.46	1	1	1		1	1	0	1	0	0	0	0	0	0	0	0	0	0	0	0	0	0	0	0	0	0	0	0
36868786	1575.27	1618	1	1		0	0.43617	1	1	1	0	1	1	1	0	0	0	0	0	0	0	0	0	0	0	0	0	0	0	0	0	0	0	0	0
36868786	1969.27	1968	1		1	0	0.48936	0	1	1	0	0	0	0	0	0	0	0	0	0	0	0	0	0	0	0	0	0	0	0	1	1	0	0	0
36868786	960.498	575	1		1	1	0.28723	0		0	0																								0
36868786			1		1		0.28723			0	0	1	1	0	1	0	0	0	0	0	0	1	1	0	0	0	0	0	0	1	0	0	0	0
36868786	1129.4	1071	1	0	0	0	0.52	0	1	0		0	0	0	0	0	0	0	0	0	0	0	0	0	0	0	0	0	0	0	0	0	0	0	0
36868786	1876.27	1876	1		1	0	0.45745	0	1	0	0	1	0	0	0	0	0	0	0	0	0	1	1	0	0	0	0	0	0	0	0	0	0	0	0
36868786	828.408	770	1	0	0	1	0.42	1	1	1		1	1	0	1	0	0	0	0	0	0	1	1	0	0	0	0	0	0	1	0	0	0	0	0
36868786	1188.39	1225	1	1		1	0.41489	1	1	1	0	1	0	0	0	0	0	0	0	0	0	1	1	0	0	0	0	0	0	0	0	0	0	0	0
36868786	1959.51	1574	1		1	1	0.29787	0	1	1	0	1	1	0	1	0	0	0	0	0	0	1	1	0	0	0	0	0	0	1	1	1	0	0	0
36868786	329.396	443	1	1		0	0.41489	1	1	1	1	1	1	1	0	0	0	0	0	0	0	1	1	0	0	0	0	0	0	1	0	0	0	0	1
36868786	1100.52	716	1		1	0	0.29787	0	1	1	1	1	0	0	0	0	0	0	0	0	0	1	1	0	0	0	0	0	0	0	0	0	0	0	0
36868786	283.403	283	1	1		0	0.53191	1			1	1	1	0	1	0	0	0	0	0	0	1	1	0	0	0	0	0	0	1	0	0	0	0	0
36868786			1	1			0.30851				0	1	1	0	1	0	0	1	0	0	0	1	1	0	0	0	0	0	0	1	0	0	0	0
66167844	774.41	717	1	0	0	0	0.47872	1				1	1	0	1	1	0	0	0	0	0	1	1	0	0	0	0	0	0	1	0	0	0	0	0
66167844	1130.32		1	1		0	0.47872	1			0																								0
66167844	414.409	352	1	0	0	0	0.28	0	0	1		1	0	0	0	0	0	0	0	0	0	1	0	1	0	0	0	0	0	0	0	0	0	0	0
66167844	763.418	763	1	1		0	0.26596	0	0	1	0	1	1	1	1	0	0	0	0	0	0	1	1	0	0	0	0	0	0	1	1	1	0	0	1
66167844	1156.46	1155	1		1	0	0.30851	0	0	1	0	1	1	1	0	0	0	0	0	0	0	1	1	0	0	0	0	0	0	1	0	0	0	0	0
66167844	414.414	352	1	0	0	1	0.28	0	0	1		1	1	1	1	1	0	0	0	0	0	0	0	0	0	0	0	0	0	1	0	0	0	0	0
66167844	763.424	763	1	1		1	0.26596	0	0	1	0	1	1	1	0	1	0	0	0	0	0	1	1	0	0	0	0	0	0	1	0	0	0	0	1
66167844	1156.47	1156	1		1	1	0.30851	0	0	1	0	1	1	1	0	0	0	0	0	0	0	1	1	0	0	0	0	0	0	1	0	0	0	0	0
66167844	476.506	237	1	0	0	0	0.19	0	0	1		1	1	0	1	0	0	0	0	0	0	0	0	0	0	0	0	0	0	0	1	0	1	0	0
66167844	649.343	706	1	1		0	0.14894	1	0	1	0	1	1	0	1	0	0	0	0	0	0	1	1	0	0	0	0	0	0	1	0	0	0	0	0
66167844	1041.46		1		1	0	0.28723	0	0	1	0																								0
66167844	215.35	214	1		1	0	0.45745	1		0	1	1	1	0	0	1	0	0	0	0	0	0	0	0	0	0	0	0	0	0	0	0	0	0	0
66167844	282.386		1	1		1	0.41489	0			1																								0
66167844	829.509	590	1	0	0	0	0.2234	0				1	0	0	0	0	0	0	0	0	0	1	1	1	0	0	0	0	0	1	1	1	0	0	0
66167844	1006.28	1006	1	1		0	0.2234	1			0	1	1	1	1	0	0	0	0	0	0	1	1	0	0	1	1	0	0	1	1	1	0	0	1
66167844	1394.52	1395	1		1	0	0.30851	0			0	1	1	1	0	0	0	0	0	0	0	1	1	0	0	0	0	0	0	1	1	1	0	0	0
66167844	222.425	165	1	0	0	0	0.41	0	0	1		1	1	0	0	0	1	0	0	0	0	0	0	0	0	0	0	0	0	0	0	0	0	0	0
66167844	1076.43		1	0	0	0	0.33	1	0	1																									0
66167844	1430.39	1591	1	1		0	0.39362	1	0	1	0	0	0	0	0	0	0	0	0	0	0	0	0	0	0	0	0	0	0	0	0	0	0	0	0
66167844	1824.38		1		1	0	0.39362	1	0	1	0																								0
66167844	1254.43		1	0	0	1	0.37	0	0	1																									0
66167844	1608.37		1	1		1	0.43617	1	0	1	0																								0
66167844	2001.47	2001	1		1	1	0.32979	0	0	1	0	1	1	1	0	0	0	0	0	0	0	1	1	0	0	0	0	0	0	1	1	1	0	0	0
77873583	1124.7		1	0	0	0	0.7	1	1	1																									0
77873583	1468.41	1468	1	1		0	0.5	1	1	1	0	1	1	1	1	0	0	0	0	0	0	1	1	0	0	1	1	0	0	1	1	1	0	0	0
77873583	1893.87	1862	1		1	0	0.48936	1	1	1	0	1	1	1	0	0	0	0	0	0	0	1	1	0	0	0	0	0	0	1					0
77873583	314.997	315	1		1	0	0.60638	1			1	1	0	0	0	0	0	0	0	0	0	1	1	1	0	0	0	0	0	1	0	0	0	0	1
77873583	457.689	392	1	0	0	1	0.43	1	1	1		1	1	0	1	0	0	0	0	0	0	1	1	0	0	1	1	1	0	1	0	0	0	0	0
77873583	801.379	1036	1	1		1	0.29787	1	1	1	0	1	1	1	1	0	0	0	0	0	0	1	1	0	0	0	0	0	0	1	1	0	1	0	0
77873583	1226.88	1195	1		1	1	0.31915	0	1	1	0	1	1	1	0	1	0	0	0	0	0	0	0	0	0	0	0	0	0	1	1	1	0	0	0
77873583	607.818		1	0	0	0	0.43	1	1	1																									0
77873583		1013	1	1		0	0.29787	1	1	1	0	1	1	1	1	0	0	0	0	0	0	1	1	0	0	0	0	0	0	1	1	1	1	1
77873583	1378.87	1347	1		1	0	0.31915	1	1	1	0	1	1	1	1	0	0	1	0	0	0	1	1	0	0	0	0	0	0	1	1	1	0	0	0
77873583	1039.81		1	0	0	0	0.37	0	1	1																									0
77873583	1366.43	1425	1	1		0	0.29787	0	1	1	0	1	1	1	1	0	0	0	0	0	0	1	1	0	0	0	0	0	0	1	1	1	1	1	0
77873583	1791.87	1766	1		1	0	0.45745	0	1	1	0	1	1	1	0	0	0	0	0	0	0	1	1	0	0	0	0	0	0	1	1	1	0	0	0
33378518	329.862	277	1	0	0	1	0.48	1	1	1		1	1	0	1	1	0	1	0	0	0	1	1	0	0	1	0	1	0	1	1	1	1	1	0
33378518	1039.87	987	1	0	0	1	0.48	1	1	1		1	1	1	1	0	0	0	0	0	0	1	1	0	0	0	0	0	0	1	0	0	0	0	0
33378518	310.836	309	1		1	1	0.38298	0		0	1	1	1	0	0	1	0	0	0	0	0	0	0	0	0	0	0	0	0	0	0	0	0	0	1
33378518	754.875	702	1	0	0	1	0.73	1	1	1		0	0	0	0	0	0	0	0	0	0	0	0	0	0	0	0	0	0	0	0	0	0	0	0
33378518	1097.4	1146	1	1		1	0.46809	0	1	1	0	1	1	1	1	0	0	0	0	0	0	1	1	0	0	0	0	0	0	1	1	1	0	0	0
33378518	370.388	431	1	1		0	0.45745	1		0	1	0	0	0	0	0	0	0	0	0	0	0	0	0	0	0	0	0	0	0	0	0	0	0	0
33378518	415.365	476	1	1		1	0.44681	1		0	1	1	1	0	1	0	0	0	0	0	0	0	0	0	0	0	0	0	0	0	0	0	0	0	0
33378518	1193.4	960	1		1	1	0.41489	1		0	1	1	1	0	1	0	0	0	0	0	0	1	1	0	0	0	0	0	0	1					1
33378518	829.434	784	1	0	0	1	0.45	1	1	1		1	1	1	1	0	0	0	0	0	0	1	1	0	0	0	0	0	0	1	0	0	0	0	0
33378518	1179.35	1179	1	1		1	0.31915	0	1	1	0	1	1	1	0	0	0	0	0	0	0	1	1	0	0	0	0	0	0	1	1	1	0	0	0
33378518	1584.04	1583	1		1	1	0.2234	0	1	1	0	1	1	1	0	0	0	1	0	0	0	1	1	0	0	0	0	0	0	1	1	1	0	0	0
33378518	1461.44		1	0	0	1	0.45	1	1	1																									0
33378518	1811.36	1811	1	1		1	0.31915	0	1	1	0	1	1	1	0	0	0	0	0	0	0	1	1	0	0	0	0	0	0	1	1	1	0	0	0
33378518	2216.04	2215	1		1	1	0.2234	0	1	1	0	1	1	1	1	0	0	0	0	0	0	1	1	0	0	0	0	0	0	1	1	1	0	0	0
33378518	664.445	619	1	0	0	1	0.49	1	1	1		1	1	1	1	0	0	0	0	0	0	1	1	0	0	0	0	0	0	1	1	1	0	0	0
33378518	1014.37	1014	1	1		1	0.52128	1	1	1	0	1	1	1	1	0	0	0	0	0	0	1	1	0	0	0	0	0	0	1	1	1	0	0	1
33378518	1793.39	1560	1		1	1	0.60638	1	1	1	0	1	1	1	1	0	0	0	0	0	0	1	1	1	0	1	0	0	1	1					1
33378518	349.869	348	1		1	0	0.48936	0		0	1	1	1	0	0	1	1	0	0	0	0	0	0	0	0	0	0	0	0	1	0	0	0	0	1
33378518	375.007	514	1		1	0	0.53191	0			1	1	1	0	1	1	0	0	0	0	0	0	0	0	0	1	0	0	1	1					0
28118583	847.398	795	1	0	0	0	0.29	0	1	1		1	0	0	0	0	0	0	0	0	0	1	1	1	0	0	0	0	0	1	0	0	0	0	0
28118583	1190.38	1253	1	1		0	0.29787	1	1	1	0	1	1	1	0	0	0	0	0	0	0	1	1	0	0	0	0	0	0	1	1	1	0	0	0
28118583	1972.42	1596	1		1	0	0.3617	1	1	1	0	1	1	1	0	0	0	0	0	0	0	0	0	0	0	0	0	0	0	0	1	1	0	0	0
28118583	186.364		1	1		1	0.45745	1		0	1																								1
28118583	361.509	311	1	0	0	1	0.29	0	1	1		0	0	0	0	0	0	0	0	0	0	0	0	0	0	0	0	0	0	0	0	0	0	0	0
28118583	708.386	808	1	1		1	0.34043	1	1	1	0	1	1	1	0	0	0	0	0	0	0	1	1	0	0	0	0	0	0	1	1	1	1	1	0
28118583	1488.42		1		1	1	0.48936	1	1	1	0	1	1	1	1	0	0	0	0	0	0	1	1	0	0	0	0	0	0	1					0
28118583	232.515	182	1	0	0	1	0.31	1	1	1		0	0	0	0	0	0	0	0	0	0	0	0	0	0	1	1	0	0	0	0	0	0	0	0
28118583	679.403	679	1	1		1	0.23404	1	1	1	0	1	1	1	0	0	0	0	0	0	0	1	1	0	0	0	0	0	0	1	1	1	0	0	0
28118583	983.356	983	1		1	1	0.29787	0	1	1	0	1	0	0	0	0	0	0	0	0	0	1	1	0	0	0	0	0	0	0	0	0	0	0	0
28118583	170.381	118	1	0	0	1	0.44	1	1	1		0	0	0	0	0	0	0	0	0	0	0	0	0	0	0	0	0	0	0	0	0	0	0	0
28118583	513.37	640	1	1		1	0.23404	0	1	1	0	1	1	1	0	0	0	0	0	0	0	0	0	0	0	0	0	0	0	0	0	0	0	0	0
28118583	587.392	535	1	0	0	1	0.38	1	1	1		0	0	0	0	0	0	0	0	0	0	0	0	0	0	0	0	0	0	0	1	1	0	0	0
28118583	930.314	994	1	1		1	0.3617	1	1	1	0	1	1	1	1	0	0	0	0	0	0	0	0	0	0	0	0	0	0	1	1	1	1	1	0
28118583	1337.37	1476	1		1	1	0.3617	1	1	1	0	1	0	0	0	0	0	0	0	0	0	1	1	0	0	0	0	0	0	0					0
28118583	944.459	886	1	0	0	0	0.5	0	1	1		1	0	0	0	0	0	0	0	0	0	1	1	0	0	0	0	0	0	0	0	0	0	0	0
28118583	1281.35	1281	1	1		0	0.38298	0	1	1	0	1	1	1	1	0	0	0	0	0	0	0	0	0	0	0	0	0	0	1	1	1	0	0	1
28118583	1688.39	1597	1		1	0	0.48936	0	1	1	0	1	1	1	0	0	0	0	0	0	0	0	0	0	0	0	0	0	0	0	1	1	0	0	0
28118583	1034.41	982	1	0	0	1	0.5	1	1	1		1	1	1	0	0	0	0	0	0	0	1	1	0	0	0	0	0	0	1	0	0	0	0	0
28118583	1377.33	1440	1	1		1	0.34043	1	1	1	0	1	1	0	1	0	0	0	0	0	0	0	0	0	0	0	0	0	0	0	1	1	0	0	0
28118583	1784.38	1784	1		1	1	0.46809	1	1	1	0	0	0	0	0	0	0	0	0	0	0	0	0	0	0	0	0	0	0	0	0	0	0	0	0
86667788	464.434		1	0	0		0.36	1	1	1																									0
86667788	691.431	690	1	0	0	1	0.5	1	1	1		1	1	1	1	0	0	0	0	0	0	1	1	0	0	1	1	0	0	1	1	1	1	1	0
86667788	1106.36	1105	1	1		1	0.5	0	1	1	0	1	1	1	0	0	0	0	0	0	0	0	0	0	0	0	0	0	0	0	1	1	1	1	0
86667788	1488.38	1489	1		1	1	0.26596	1	1	1	0	1	1	1	1	0	0	0	1	0	0	1	1	0	0	0	0	0	0	1	1	1	1	1	0
86667788	364.361	363	1	1		1	0.5	0	1	1	1	0	0	0	0	0	0	0	0	0	0	0	0	0	0	1	1	0	0	0	1	1	1	1	0
86667788	746.386	745	1		1	1	0.26596	1	1	1	1	1	1	0	1	0	0	0	0	0	0	1	1	0	0	0	0	0	0	1	1	1	1	1	0
67875158	356.387	355	1	0	0	0	0.45	0	0	0		1	0	0	0	0	0	0	0	0	0	1	1	0	0	0	0	0	0	0	0	0	0	0	0
67875158	101.296	317	1	1		1	0.38298	1	0	0	1	1	1	1	0	1	0	0	0	0	0	0	0	0	0	0	0	0	0	1	0	0	0	0	0
87217632	739.524	739	1	0	0	0	0.48	1	1	1		1	1	1	1	0	0	1	0	0	0	1	1	0	0	0	0	0	0	1	0	0	0	0	0
87217632	85.423	101	1	1		1	0.31915	0	1	1	1	1	1	1	0	0	0	0	0	0	0	0	0	0	0	0	0	0	0	0					1
87217632	879.398	491	1		1	1	0.6383	0	1	1	1	1	1	0	1	0	0	0	0	0	0	1	1	0	0	0	0	0	0	1	0	0	0	0	0
87217632	223.5	222	1	0	0	1	0.41	1	1	0		0	0	0	0	0	0	0	0	0	0	0	0	0	0	1	1	0	0	0	0	0	0	0	1
87217632	611.438	611	1	1		1	0.53191	1	1	0	0	1	1	1	0	1	0	0	0	0	0	1	1	0	0	1	1	0	0	1	0	0	0	0	1
87217632	1016.58	1014	1		1	1	0.55319	0	1	0	0	1	1	1	0	0	0	0	0	0	0	1	1	0	0	0	0	0	0	1	1	1	0	0	0
87217632	1031.52	1030	1	0	0	1	0.48	1	1	1		1	1	0	1	0	0	0	0	0	0	0	0	0	0	1	1	0	0	1	1	1	0	0	1
87217632	1419.47	1469	1	1		1	0.37234	1	1	1	0	1	1	1	0	0	0	0	0	0	0	1	1	0	0	0	0	0	0	1	1	1	0	0	0
87217632	2214.42		1		1	1	0.45745	1	1	1	0	1	1	1	0	0	0	0	1	0	0	1	1	0	0	0	0	0	0	1					0
87217632	99.4586	97	1	0	0	1	0.43	1	1	1		1	1	0	1	0	0	0	0	0	0	0	0	0	0	0	0	0	0	0	1	1	1	1	0
87217632	487.466	487	1	1		1	0.44681	1	1	1	0	0	0	0	0	0	0	0	0	0	0	0	0	0	0	0	0	0	0	0	1	1	1	1	0
87217632	891.558	893	1		1	1	0.39362	1	1	1	0	1	1	1	1	0	0	0	0	0	0	0	0	0	0	0	0	0	0	1	1	1	0	0	0
87217632	161.392		1	1		1	0.28723	1		0	1																								0
87217632	418.561	419	1		1	1	0.39362	0		0	1	1	1	0	1	0	1	0	0	0	0	0	0	0	0	0	0	0	0	1	0	0	0	0	0
87217632	706.606	706	1	0	0	0	0.4	1	1	0		1	1	1	1	0	0	0	0	0	0	0	0	0	0	0	0	0	0	1	1	1	0	0	0
87217632	1096.43	1145	1	1		0	0.26596	0	1	0	0	1	1	1	0	0	0	0	0	0	0	1	1	0	0	0	0	0	0	1	1	1	1	1	0
87217632	710.614	710	1	0	0	0	0.4	1	1	0		1	1	1	0	0	0	0	0	0	0	0	0	0	0	1	1	0	0	1	1	1	0	0	0
87217632	1100.44	1100	1	1		0	0.26596	0	1	0	0	1	1	1	1	0	0	1	0	0	0	1	1	0	0	0	0	0	0	1	1	1	0	0	0
87217632	1508.53	1508	1		1	0	0.46809	0	1	0	0	1	1	1	1	0	0	0	0	0	0	1	1	0	0	0	0	0	0	1					0
87217632	941.54	892	1	1		0	0.48936	1			0	1	1	1	0	0	0	0	0	0	0	0	0	0	0	0	0	0	0	0	1	1	0	0	0
87217632	1686.41		1		1	0	0.48936	1			0																								0
87217632	104.591		1	0	0	1	0.6	1	1	1																									0
87217632	494.372	493	1	1		1	0.55319	1	1	1	0	1	1	0	0	1	0	0	0	0	0	1	1	0	0	0	0	0	0	1	1	1	0	0	0
87217632	900.56	902	1		1	1	0.52128	1	1	1	0	1	1	1	0	0	0	0	0	0	0	1	1	0	0	0	0	0	0	1	1	1	0	0	0
87217632	242.465	241	1	0	0	1	0.37	1	1	1		1	1	0	0	0	0	0	1	0	0	0	0	0	0	0	0	0	0	0	0	0	0	0	0
87217632	761.477	697	1	1		1	0.45745	0	1	1	0	1	1	0	1	0	0	0	0	0	0	1	1	0	0	1	0	1	0	1	1	1	1	1	0
87217632	1416.45		1		1	1	0.52128	1	1	1	0																								0
87217632	1186.53	1185	1	0	0	1	0.37	1	1	1		1	1	1	0	0	0	0	0	0	0	1	1	0	0	0	0	0	0	1	1	1	0	0	0
87217632	1816.38	1819	1	1		1	0.45745	1	1	1	0	1	1	1	1	0	0	0	0	0	0	0	0	0	0	0	0	0	0	1	1	1	0	0	0
87217632	2368.39	2118	1		1	1	0.52128	1	1	1	0	1	1	0	0	0	0	0	1	0	0	1	1	0	0	0	0	0	0	1					1
87217632	1170.53	1120	1	1		0	0.53191	0			0	1	1	1	0	0	0	0	0	0	0	1	1	0	0	0	0	0	0	1	1	1	0	0	0
87217632	280.406	279	1	1		0	0.52128	1			1	1	1	0	1	0	0	0	0	0	0	0	0	0	0	0	0	0	0	0	0	0	0	0	0
36248633	1333.62		1	0	0	0	0.39	0	1	1																									0
36248633	1718.48	1795	1	1		0	0.2766	0	1	1	0	1	1	1	0	0	0	0	0	0	0	1	1	0	0	0	0	0	0	1	0	0	0	0	0
36248633	2127.45	2263	1		1	0	0.34043	1	1	1	0	0	0	0	0	0	0	0	0	0	0	0	0	0	0	1	1	0	0	0					0
36248633	92.6093		1	0	0	1	0.45	0	1	1																									0
36248633	849.574	848	1	0	0	0	0.5	1	1	0		1	1	0	1	0	0	0	0	0	0	1	1	0	0	0	0	0	0	1	0	0	0	0	0
36248633	1368.48	1253	1	1		0	0.3617	1	1	0	0	1	1	0	1	0	0	0	0	0	0	1	1	0	0	0	0	0	0	1	1	1	1	1	0
36248633	2030.51	1779	1		1	0	0.57447	1	1	0	0	1	1	1	0	1	0	0	0	0	0	1	1	0	0	0	0	0	0	1					0
36248633	221.562	220	1	0	0	1	0.52	1	1	1		1	1	0	1	0	0	0	0	0	0	0	0	0	0	1	1	0	0	1	0	0	0	0	0
36248633	626.396	681	1	1		1	0.55319	1	1	1	0	1	1	1	1	0	0	0	0	0	0	1	1	0	0	0	0	0	0	1	1	1	0	0	0
36248633	1395.59	1394	1	0	0	0	0.37	0	1	1		1	1	1	1	0	0	0	0	0	0	1	1	0	0	0	0	0	0	1	1	1	0	0	0
36248633	1914.49	1799	1	1		0	0.45745	0	1	1	0	1	1	1	1	0	0	1	1	0	0	1	1	0	0	0	0	0	0	1	1	1	0	0	0
36248633	2189.46	2189	1		1	0	0.28723	0	1	1	0	1	1	1	0	0	0	0	0	0	0	1	1	0	0	0	0	0	0	1	1	1	0	0	0
36248633	999.505	748	1		1	1	0.28723	0	1	1	1	1	0	0	0	0	0	0	0	0	0	1	1	0	0	0	0	0	0	0					0
27342785	405.341	408	1	1		0	0.31915	1			1	1	1	0	1	0	0	0	0	0	0	0	0	0	0	0	0	0	0	0	1	0	1	0	0
27342785	792.418	792	1		1	0	0.39362	0			1	1	1	1	0	0	0	0	0	0	0	0	0	0	0	0	0	0	0	0	1	0	1	0	0
27342785	1656.49		1	0	0	1	0.42	0	1	1																									0
27342785	634.913	271	1	1		0	0.43617	0	1	1	1	0	0	0	0	0	0	0	0	0	0	0	0	0	0	0	0	0	0	0	1	1	1	1	0
27342785	1059.53	1058	1	0	0	0	0.6	1	1	1		1	1	1	0	0	0	0	0	0	0	1	1	0	0	0	0	0	0	1	1	1	0	0	0
27342785	1832.92	1518	1	1		0	0.57447	1	1	1	0	1	1	0	1	0	0	0	0	0	0	1	1	0	0	0	0	0	0	1					1
27342785	2232.41		1		1	0	0.55319	1	1	1	0																								0
27342785	354.409	353	1		1	0	0.55319	1	1	1	1	0	0	0	0	0	0	0	0	0	0	0	0	0	0	0	0	0	0	0	0	0	0	0	0
27342785			1	0	0		0.4	1	1	1		1	1	1	0	0	0	0	0	0	0	1	1	0	0	0	0	0	0	1	1	1	1	1	0
27342785	136.399	137	1		1	0	0.6383	0			1	1	1	0	1	0	0	0	0	0	0	0	0	0	0	0	0	0	0	0					0
38436158	1179.62	1178	1	0	0	1	0.43	0	1	1		1	1	1	1	0	0	0	0	0	0	1	1	0	0	0	0	0	0	1	1	1	0	0	1
38436158	1564.36	1566	1	1		1	0.26596	1	1	1	0	1	1	1	1	0	0	0	0	0	0	1	1	0	0	0	0	0	0	1	1	1	0	0	0
38436158	1969.58	1968	1		1	1	0.43617	0	1	1	0	1	1	1	0	0	0	0	0	0	0	1	1	0	0	0	0	0	0	1					0
38436158	66.2988	65	1	1		1	0.26596	1	1	1	1	1	1	1	1	0	0	0	0	0	0	0	0	0	0	0	0	0	0	1					0
38436158	245.652		1	0	0	0	0.43	0	1	1																									0
38436158	49.6715	48	1	0	0	0	0.38	1	1	1		0	0	0	0	0	0	0	0	0	0	0	0	0	0	0	0	0	0	0	0	0	0	0	0
38436158	273.694	272	1	0	0	0	0.29	0	1	1		1	1	0	0	0	0	1	0	0	0	0	0	0	0	1	1	0	0	1	1	1	0	0	0
38436158	657.424	793	1	1		0	0.42553	0	1	1	0	1	1	1	1	0	0	0	0	0	0	1	1	0	0	0	0	0	0	1					0
38436158	1063.6	1062	1		1	0	0.31915	0	1	1	0	1	1	1	0	0	0	0	0	0	0	1	1	0	0	0	0	0	0	1	0	0	0	0	0
38436158	227.683		1	0	0	1	0.29	0	1	1																									0
38436158	963.697	962	1	0	0	0	0.29	0	1	1		1	1	1	0	0	0	0	0	0	0	0	0	0	0	0	0	0	0	0	1	1	0	0	0
38436158	362.706	361	1	0	0	1	0.44	1	1	1		1	0	0	0	0	0	0	0	0	0	1	1	0	0	1	1	0	0	1	0	0	0	0	0
38436158	2065.41	1679	1		1	1	0.41489	0	1	1	0	1	1	1	1	0	0	0	0	0	0	0	0	0	0	0	0	0	0	1	1	1	0	0	0
38436158	488.431	102	1		1	1	0.41489	0	1	1	1	0	0	0	0	0	0	0	0	0	0	0	0	0	0	0	0	0	0	0					0
38436158	609.639	608	1	0	0	1	0.53	1	1	1		1	1	1	1	0	0	0	0	0	0	1	1	0	0	0	0	0	0	1	1	1	0	0	0
38436158	606.734	605	1	0	0	0	0.34	0	1	1		1	0	0	0	0	0	0	0	0	0	1	1	0	0	0	0	0	0	0	0	0	0	0	1
38436158	990.425		1	1		0	0.19149	0	1	1	0																								0
38436158			1	0	0		0.34		1	1		1	1	1	1	0	0	0	0	0	0	0	0	0	0	0	0	0	0	1	1	0	1	0
38436158	133.441	340	1	1		1	0.19149	1	1	1	1	0	0	0	0	0	0	0	0	0	0	0	0	0	0	0	0	0	0	0					1
38436158	550.446	540	1		1	1	0.5	0	1	1	1	1	1	0	1	0	0	0	0	0	0	0	0	0	0	0	0	0	0	0	1	1	0	0	0
38436158	507.425	494	1	0	0	0	0.35	0	1	1		1	1	1	0	0	0	0	0	0	0	1	1	0	0	0	0	0	0	1	0	0	0	0	1
38436158	879.519	1012	1	1		0	0.28723	0	1	1	0	1	1	1	1	0	0	0	0	0	0	1	1	0	0	1	1	0	0	1	1	1	0	0	0
38436158	1288.5	1285	1		1	0	0.28723	0	1	1	0	1	1	1	1	0	0	0	0	0	0	1	1	0	0	0	0	0	0	1	1	1	0	0	0
38436158		1753	1		1	1	0.48936	0			0	1	1	1	0	0	0	0	0	0	0	1	1	0	0	1	1	0	0	1
38436158	130.377	374	1	1		0	0.30851	0		0	1	1	1	0	1	0	0	0	0	0	0	1	1	0	0	0	0	0	0	1					0
38436158	920.416	535	1		1	0	0.32979	0		0	1	1	1	0	1	0	0	0	0	0	0	1	1	0	0	0	0	0	0	1	0	0	0	0	0
38436158	322.315	319	1	1		0	0.42553	0		0	1	1	1	1	0	0	1	0	0	0	0	0	0	0	0	1	0	1	0	1	0	0	0	0	1
38436158	736.465	725	1		1	0	0.44681	0		0	1	1	1	1	0	0	0	0	0	0	0	1	1	0	0	0	0	0	0	1	0	0	0	0	0
38436158			1	1		0	0.28723	0		0	0	1	0	0	0	0	0	0	0	0	0	1	1	0	0	1	1	0	0	1	1	1	0	0	0
38436158			1		1	0	0.25532	0		0	0	1	0	0	0	0	0	0	0	0	0	1	1	0	0	1	0	1	0	1	1	1	0	0
38436158	877.612	802	1	1		0	0.29787	1		0	0	1	1	1	1	0	0	0	0	0	0	1	1	0	0	0	0	0	0	1	1	1	0	0	0
38436158	167.588		1	1		1	0.29787	1		0	1																								0
36236123	395.361	317	1		1	1	0.26596	1		0	1	1	1	0	1	0	0	0	0	0	0	0	0	0	0	0	0	0	0	0	0	0	0	0	1
36236123	516.36	516	1	0	0	1	0.34	1	1	1		0	0	0	0	0	0	0	0	0	0	0	0	0	0	0	0	0	0	0	1	1	0	0	1
36236123	1022.45	1150	1	1		1	0.26596	1	1	1	0	1	1	1	0	0	0	0	0	0	0	1	1	0	0	0	0	0	0	1	0	0	0	0	0
36236123	1383.37	1385	1		1	1	0.44681	1	1	1	0	1	1	1	0	0	0	0	0	0	0	0	0	0	0	0	0	0	0	0	1	1	0	0	0
36236123	586.384		1	0	0	0	0.36	0	1	1																									0
36236123	968.404	968	1	0	0	0	0.41	1	1	1		1	1	1	1	0	0	0	0	0	0	1	1	0	0	0	0	0	0	1	1	1	1	1	1
36236123	1474.43	1475	1	1		0	0.37234	0	1	1	0	1	0	0	0	0	0	0	0	0	0	1	1	0	0	0	0	0	0	0	1	1	0	0	0
36236123	1835.39	1836	1		1	0	0.3617	1	1	1	0	1	1	1	1	0	0	0	0	0	0	1	1	0	0	0	0	0	0	1	1	1	0	0	0
36236123	391.391	313	1		1	1	0.3617	1	1	1	1	1	1	0	0	1	0	0	0	0	0	0	0	0	0	0	0	0	0	0	0	0	0	0	1
78674788	344.538	343	1	0	0	0	0.41	1	1	0		0	0	0	0	0	0	0	0	0	0	0	0	0	0	0	0	0	0	0	0	0	0	0	1
78674788	840.376	839	1	1		0	0.34043	1	1	0	0	1	1	1	0	0	0	0	0	0	0	0	0	0	0	1	1	0	0	1	0	0	0	0	0
78674788	1214.5	1206	1		1	0	0.2766	0	1	0	0	1	1	1	0	0	0	0	0	0	0	0	0	0	0	0	0	0	0	0	1	1	0	0	0
78674788	1380.54	1379	1	0	0	0	0.41	1	1	0		1	0	0	0	0	0	0	0	0	0	1	0	1	0	0	0	0	0	0	0	0	0	0	1
78674788	1876.39	1875	1	1		0	0.34043	1	1	0	0	1	1	1	0	0	0	0	0	0	0	0	0	0	0	0	0	0	0	0	0	0	0	0	0
78674788	2252.53	2242	1		1	0	0.2766	1	1	0	0	1	1	1	0	0	0	0	0	0	0	0	0	0	0	0	0	0	0	0	1	1	0	0	0
78674788	329.547	319	1		1	0	0.2766	1	1	0	1	0	0	0	0	0	0	0	0	0	0	0	0	0	0	0	0	0	0	0	0	0	0	0	0
51787714	377.634	372	1	1		0	0.41489	0		0	0	0	0	0	0	0	0	0	0	0	0	0	0	0	0	0	0	0	0	0					0
51787714	164.376	156	1	1		0	0.41489	0		0	1	0	0	0	0	0	0	0	0	0	0	0	0	0	0	0	0	0	0	0	0	0	0	0	0
51787714	521.399	521	1		1	0	0.42553	0		0	1	1	1	0	1	0	0	0	0	0	0	1	1	0	0	0	0	0	0	1	0	0	0	0	0
51787714	141.357		1	1		1	0.42553	0		0	1																								0
51787714	504.406	427	1		1	1	0.44681	0		0	1	1	1	0	1	0	0	0	0	0	0	1	1	0	0	0	0	0	0	1	1	0	1	0	0
51787714	607.511	606	1	0	0	1	0.3	0	1	0		1	1	1	1	1	0	0	0	0	0	1	1	0	0	0	0	0	0	1	1	1	0	0	0
51787714	1108.62		1	1		1	0.39362	0	1	0	0																								0
18788617	69.5713	68	1	0	0	1	0.44	1	1	0																					0	0	0	0	0
18788617	568.476	565	1	1		1	0.44	0	1	0	0	1	0	0	0	0	0	0	0	0	0	1	1	0	0	0	0	0	0	0	0	0	0	0	0
18788617	829.577	828	1	0	0	1	0.3	0	1	0		1	1	1	0	0	0	0	1	0	0	1	1	0	0	0	0	0	0	1	0	0	0	0	0
18788617	761.583	849	1	0	0	0	0.6	1	1	0		1	0	0	0	0	0	0	0	0	0	1	1	0	0	0	0	0	0	0	1	1	0	0	1
18788617	1282.56	1395	1	1		0	0.57447	0	1	0	0	1	0	0	0	0	0	0	0	0	0	1	0	1	0	0	0	0	0	0					0
18788617	1629.59		1		1	0	0.45745	1	1	0	0																								0
84421675	613.37	612	1	1		1	0.52128	0		0	0	0	0	0	0	0	0	0	0	0	0	0	0	0	0	1	1	0	0	0					0
84421675	1165.5	1159	1	1		1	0.39362	1		0	0	1	1	1	0	0	0	0	0	0	0	1	1	1	0	0	0	0	0	1	0	0	0	0	0
84421675	1525.51	1638	1		1	1	0.39362	1		0	0	1	1	1	1	0	0	0	0	0	0	1	1	0	0	0	0	0	0	1
84421675	1275.48	1261	1	1		0	0.39362	0		0	0	1	0	0	0	0	0	0	0	0	0	1	1	0	0	0	0	0	0	0	0	0	0	0	0
84421675	1944.47		1		1	0	0.39362	0		0	0																								0
84421675	1177.62	1170	1	1		0	0.39362	1		0	0	1	0	0	0	0	0	0	0	0	0	1	1	0	0	0	0	0	0	0	0	0	0	0	0
84421675	1853.48		1		1	0	0.39362	0		0	0																								0
84421675	148.472	147	1		1	0	0.60638	1			0	0	0	0	0	0	0	0	0	0	0	0	0	0	0	0	0	0	0	0					0
54853545	1276.53	1411	1	1		1	0.40426	1		0	0	0	0	0	0	0	0	0	0	0	0	0	0	0	0	0	0	0	0	0					0
54853545	56.5085	55	1	0	0	0	0.42	1	1	0		1	1	0	1	0	0	0	0	0	0	0	0	0	0	0	0	0	0	0	1	1	1	1	1
54853545	904.52	903	1	0	0	0	0.42	1	1	0		0	0	0	0	0	0	0	0	0	0	0	0	0	0	0	0	0	0	0	0	0	0	0	0
54853545	1526.53	1528	1	1		0	0.29787	1	1	0	0	1	1	0	1	0	0	0	0	0	0	0	0	0	0	0	0	0	0	0	0	0	0	0	0
18667718	612.541		1	1		0	0.25532	0		0	0																								0
18667718	964.557	962	1		1	0	0.17021	0		0	0	1	0	0	0	0	0	0	0	0	0	1	1	0	0	0	0	0	0	0	1	1	1	1	0
18667718	170.564	165	1		1	1	0.24468	0		0	1	0	0	0	0	0	0	0	0	0	0	0	0	0	0	0	0	0	0	0	0	0	0	0	0
18667718	1234.55	1202	1	0	0	0	0.22	0	0	0		1	1	1	0	0	0	0	0	0	0	1	1	0	0	0	0	0	0	1	0	0	0	0	0
18667718	1765.59	1730	1	1		0	0.25532	0	0	0	0	1	1	1	0	0	0	0	0	0	0	1	1	0	0	0	0	0	0	1	1	1	1	1	0
18667718	1234.56	1233	1	0	0	1	0.22	0	0	0		1	1	1	0	0	0	0	0	0	0	1	1	0	0	0	0	0	0	1	1	1	1	1	0
18667718	1765.6	1862	1	1		1	0.25532	0	0	0	0	1	1	1	0	0	1	0	0	0	0	1	1	0	0	0	0	0	0	1	0	0	0	0	0
83864623	256.516	255	1	0	0	1	0.43	1	1	1		0	0	0	0	0	0	0	0	0	0	0	0	0	0	1	1	0	0	0	0	0	0	0	0
83864623	31.5238	30	1	0	0	0	0.58	1	1	1		1	1	0	0	0	1	0	0	0	0	0	0	0	0	1	1	0	0	1	0	0	0	0	0
83864623	428.319	486	1	1		0	0.44681	1	1	1	0	0	0	0	0	0	0	0	0	0	0	0	0	0	0	0	0	0	0	0	0	0	0	0	0
83864623	830.761	828	1		1	0	0.40426	1	1	1	0	1	0	0	0	0	0	0	0	0	0	1	1	0	0	0	0	0	0	0	0	0	0	0	0
45563853	788.58		1	0	0	0	0.5	1	1	1																									0
45563853	1181.44	1243	1	1		0	0.3617	0	1	1	0	1	1	0	1	0	1	0	0	0	0	1	1	0	0	0	0	0	0	1					0
45563853	1572.98	1577	1		1	0	0.31915	1	1	1	0	1	1	1	0	0	0	0	0	0	0	1	1	0	0	0	0	0	0	1	1	1	1	1	0
45563853	643.997	643	1		1	1	0.60638	1			1	0	0	0	0	0	0	0	0	0	0	0	0	0	0	0	0	0	0	0	1	1	0	0	1
36212187	694.555	693	1	0	0	0	0.45	0	1	1		1	1	1	0	0	0	0	0	0	0	0	0	0	0	0	0	0	0	0	0	0	0	0	0
36212187	1090.38		1	1		0	0.39362	0	1	1	0																								0
36212187	1511.86	1512	1		1	0	0.39362	0	1	1	0	1	1	1	0	0	0	1	0	0	0	1	1	0	1	0	0	0	0	1	1	1	0	0	0
36212187	422.29	421	1	1		1	0.39362	1	1	1	1	1	1	1	1	0	1	0	0	0	0	0	0	0	0	0	0	0	0	1	0	0	0	0	1
55442135	90.4789	90	1	0	0	1	0.52	1	1	1		0	0	0	0	0	0	0	0	0	0	0	0	0	0	0	0	0	0	0	0	0	0	0	1
55442135	486.346	487	1	1		1	0.37234	1	1	1	0	0	0	0	0	0	0	0	0	0	0	0	0	0	0	1	1	0	0	0	0	0	0	0	0
55442135	875.834		1		1	1	0.46809	1	1	1	0																								0
28187548	1329.38	1330	1	1		1	0.48936	1			0	1	1	1	0	0	0	0	0	0	0	1	1	0	0	0	0	0	0	1	1	1	1	1	0
28187548	2013.35		1		1	1	0.52128	1			0																								1
28187548	337.525		1	0	0	1	0.36	0	1	1																									0
28187548	970.359	972	1	1		1	0.25532	0	1	1	0	1	0	0	0	0	0	0	0	0	0	1	1	0	0	0	0	0	0	0	1	1	0	0	0
28187548	1243.39	1202	1		1	1	0.31915	0	1	1	0	1	1	1	0	0	0	0	0	0	0	1	1	0	0	0	0	0	0	1	1	0	1	0	0
28187548	1043.53		1	0	0	0	0.36	0	1	1																									0
28187548	1676.36	1676	1	1		0	0.25532	0	1	1	0	1	0	0	0	0	0	0	0	0	0	1	1	0	0	0	0	0	0	0	1	0	1	0	0
28187548	1949.39	1910	1		1	0	0.31915	0	1	1	0	1	1	1	0	0	0	0	0	0	0	1	1	0	0	0	0	0	0	1	1	1	1	1	0
28187548	1338.41		1		1	1	0.43617	1			0																								0
58342536	1013	1013	1	0	0	1	0.3617	0				1	1	1	0	1	0	0	0	0	0	1	1	0	0	0	0	0	0	1	1	1	1	1	0
58342536	1509.45	1508	1	1		1	0.3617	0			0	1	1	1	0	0	0	0	0	0	0	1	1	0	0	0	0	0	0	1					0
58342536	1876.5	1873	1		1	1	0.28723	0			0	1	1	1	0	1	0	0	0	0	0	0	0	0	0	0	0	0	0	1	1	1	1	1	0
63754713	284.519		1	0	0	1	0.36	1	1	1																									0
63754713	652.588		1	1		1	0.55319	1	1	1	0																								1
63754713	1020.37	1097	1		1	1	0.56383	1	1	1	0	1	0	0	0	0	0	0	0	0	0	1	1	0	0	0	0	0	0	0					0
74118771	227.377	227	1	0	0	1	0.43	1	1	1		1	0	0	0	0	0	0	0	0	0	1	0	1	0	0	0	0	0	0	0	0	0	0	0
74118771	730.512		1	1		1	0.39362	1	1	1	0																								1
74118771	1083.36	1244	1		1	1	0.39362	1	1	1	0	1	1	0	1	0	0	0	0	0	0	0	0	0	0	0	0	0	0	0					0
74118771	955.378	954	1	0	0	0	0.43	1	1	1		1	0	0	0	0	0	0	0	0	0	1	0	1	0	0	0	0	0	0					0
74118771	1458.52	1512	1	1		0	0.39362	1	1	1	0	1	0	0	0	0	0	0	0	0	0	1	1	1	0	0	0	0	0	1					0
74118771	2044.47	1972	1		1	0	0.39362	1	1	1	0	1	1	1	1	0	0	1	1	0	0	0	0	0	0	0	0	0	0	1					0
74118771	179.597	179	1	0	0	1	0.51	1	1	1		1	0	0	0	0	0	0	0	0	0	1	0	1	0	0	0	0	0	0	0	0	0	0	1
74118771	691.354		1	1		1	0.24468	1	1	1	0																								0
74118771	1034.33	1129	1		1	1	0.57447	1	1	1	0	1	1	1	1	1	0	0	0	0	0	0	0	0	0	0	0	0	0	1	0	0	0	0	1
74118771	402.335	402	1		1	0	0.57447	1	1	1	1	0	0	0	0	0	0	0	0	0	0	0	0	0	0	0	0	0	0	0					0
74118771	620.366	620	1	0	0	0	0.42	1	1	1		1	0	0	0	0	0	0	0	0	0	1	1	1	0	0	0	0	0	1	0	0	0	0	1
74118771	1131.39	1130	1	1		0	0.38298	1	1	1	0	1	0	0	0	0	0	0	0	0	0	1	1	0	0	0	0	0	0	0	0	0	0	0	0
74118771	1476.34	1474	1		1	0	0.3617	1	1	1	0	1	0	0	0	0	0	0	0	0	0	1	1	0	0	0	0	0	0	0					0
74118771	620.37	620	1	0	0	0	0.42	1	1	1		1	0	0	0	0	0	0	0	0	0	1	1	1	0	0	0	0	0	1	0	0	0	0	1
74118771	1131.39	1130	1	1		0	0.38298	1	1	1	0	1	0	0	0	0	0	0	0	0	0	1	1	0	0	0	0	0	0	0	0	0	0	0	0
74118771	1476.34	1474	1		1	0	0.3617	1	1	1	0	1	1	1	0	0	0	0	0	0	0	1	1	0	0	0	0	0	0	1					0
74118771	703.416	702	1	0	0	1	0.56	1	1	1		1	1	1	1	0	0	0	0	0	0	0	0	0	0	0	0	0	0	1	1	1	0	0	1
74118771		1367	1	1		1	0.56	1	1	1	0	1	1	1	0	0	0	0	0	0	0	0	0	0	0	0	0	0	0	0
74118771	1559.37	1557	1		1	1	0.51064	0	1	1	0	1	1	1	0	0	0	0	0	0	0	1	1	0	0	0	0	0	0	1					1
63331484	419.5	419	1	0	0	0	0.43	1	1	1		0	0	0	0	0	0	0	0	0	0	0	0	0	0	0	0	0	0	0	0	0	0	0	0
63331484	890.404	891	1	1		0	0.39362	0	1	1	0	1	1	1	0	1	1	0	0	0	0	0	0	0	0	0	0	0	0	1	0	0	0	0	0
63331484	451.308	439	1		1	0	0.46809	1	1	1	1	0	0	0	0	0	0	0	0	0	0	0	0	0	0	0	0	0	0	0	0	0	0	0	1
53786255	400.615		1	0	0	0	0.58	1	1	1																									0
53786255	870.414	870	1	1		0	0.34043	1	1	1	0	1	1	1	0	0	0	0	0	0	0	1	1	0	0	0	0	0	0	1	1	0	1	0	0
53786255	1568.41	1248	1		1	0	0.38298	0	1	1	0	1	1	1	0	0	0	0	0	0	0	0	0	0	0	1	1	0	0	1	1	1	0	0	0
53786255	1032.62	1032	1	0	0	0	0.58	1	1	1		1	1	1	1	0	0	0	0	0	0	1	1	0	0	0	0	0	0	1	0	0	0	0	0
53786255	1502.42	1502	1	1		0	0.34043	1	1	1	0	1	0	0	0	0	0	0	0	0	0	1	1	0	0	0	0	0	0	0	1	0	1	0	0
53786255	1877.46	1874	1		1	0	0.38298	1	1	1	0	1	0	0	0	0	0	0	0	0	0	1	1	0	0	1	1	0	0	1	1	0	1	0	0
53786255	1441.64	1441	1	0	0	0	0.58	1	1	1		1	1	1	0	0	0	0	0	0	0	1	1	0	0	0	0	0	0	1	1	1	1	1	0
53786255	1911.43	1912	1	1		0	0.34043	1	1	1	0	0	0	0	0	0	0	0	0	0	0	0	0	0	0	0	0	0	0	0	0	0	0	0	0
53786255	710.434	383	1		1	1	0.45745	1		0	1	1	1	1	0	0	0	0	0	0	0	0	0	0	0	1	1	0	0	1					0
53786255	717.475	713	1		1	0	0.38298	0		0	0	1	1	1	0	0	0	0	0	0	0	1	1	0	0	1	1	0	0	1	0	0	0	0	0
53786255	270.641	270	1	0	0	0	0.52	1	1	1		0	0	0	0	0	0	0	0	0	0	0	0	0	0	0	0	0	0	0	0	0	0	0	1
53786255	1033.75	740	1	1		0	0.46809	1	1	1	0	1	1	1	0	1	0	0	0	0	0	1	1	0	0	0	0	0	0	1	1	1	1	1	0
53786255	1115.49	1112	1		1	0	0.5	0	1	1	0	1	1	1	0	0	0	0	0	0	0	1	1	0	1	1	1	0	0	1	0	0	0	0	0
53786255	191.645	191	1	0	0	0	0.55	1	1	1		1	1	0	1	0	0	0	0	0	0	0	0	0	0	0	0	0	0	0	0	0	0	0	0
53786255	681.375	661	1	1		0	0.55319	1	1	1	0	1	1	1	1	1	0	0	0	0	0	1	1	0	0	0	0	0	0	1	1	1	1	1	1
53786255		1040	1		1	0	0.52128	1	1	1	0	1	1	1	0	0	0	0	0	0	0	1	1	0	0	0	0	0	0	1
13847282	212.404	211	1	1		1	0.5	1		0	1	1	1	0	0	0	1	0	0	0	0	0	0	0	0	0	0	0	0	0	0	0	0	0	0
13847282	569.509	569	1		1	1	0.53191	1		0	1	1	0	0	0	0	0	0	0	0	0	1	1	0	0	0	0	0	0	0	0	0	0	0	1
13847282	253.42	252	1	1		0	0.51064	1			1	1	1	0	0	0	1	0	0	0	0	0	0	0	0	0	0	0	0	0	0	0	0	0	0
13847282	623.381	623	1		1	0	0.53191	1			1	1	1	0	0	1	0	0	0	0	0	1	1	0	0	0	0	0	0	1	0	0	0	0	1
13847282	105.368	112	1	0	0	0	0.45	1	1	1		1	1	0	0	0	1	0	0	0	0	0	0	0	0	0	0	0	0	0					0
13847282	575.46	576	1	1		0	0.34043	1	1	1	0	1	1	0	0	0	0	1	0	0	0	0	0	0	0	0	0	0	0	0	0	0	0	0	0
13847282	945.423	947	1		1	0	0.3617	1	1	1	0	0	0	0	0	0	0	0	0	0	0	0	0	0	0	0	0	0	0	0	0	0	0	0	0
13847282	800.572	507	1	1		0	0.53191	1			1	1	1	0	1	0	0	0	0	0	0	1	1	0	0	0	0	0	0	1	0	0	0	0	0
13847282	883.374	884	1		1	0	0.60638	1			1	1	0	0	0	0	0	0	0	0	0	1	1	0	0	0	0	0	0	0	0	0	0	0	1
71651563	1184.4	1184	1	0	0	0	0.41	0	1	0		1	1	1	1	0	0	0	0	0	0	1	1	0	0	0	0	0	0	1	1	1	1	1	0
71651563	1548.33	1547	1	1		0	0.37234	0	1	0	0	1	1	1	0	0	0	0	0	0	0	1	1	0	0	1	1	0	0	1	1	1	0	0	0
12531261	120	120	1	0	0	1	0.2	1	1	1		1	1	0	1	0	0	0	0	0	0	0	0	0	0	0	0	0	0	0	0	0	0	0	0
12531261	155	155	1	0	0	0	0.2	1	1	1																					0	0	0	0	0
12531261	626.45	625	1	1		0	0.2766	1	1	1	0	1	1	1	0	0	0	0	0	0	0	1	1	0	0	0	0	0	0	1	1	1	0	0	0
12531261	991.496	994	1		1	0	0.31915	1	1	1	0	1	1	1	0	0	0	0	0	0	0	1	1	0	0	0	0	0	0	1	1	1	0	0	0
12531261	974	974	1	0	0	0	0.2	1	1	1		1	1	1	1	0	0	0	0	0	0	1	1	0	1	0	0	0	0	1	1	1	0	0	0
15386218	1863.41		1		1	1		1		0	1																								0
15386218	453.455		1	0	0	1	0.63	1	1	1																									0
15386218	915.381	911	1	1		1	0.60638	1	1	1	0	1	1	0	1	0	0	0	0	0	0	1	1	0	0	0	0	0	0	1	0	0	0	0	0
15386218	1598.42		1		1	1	0.60638	1	1	1	0																								0
15386218	609.429	609	1	0	0	0	0.53	0	1	1		1	1	1	1	0	0	0	0	0	0	1	1	0	0	0	0	0	0	1	1	1	0	0	0
15386218	1067.38	1064	1	1		0	0.3617	0	1	1	0	1	1	1	0	0	0	0	0	0	0	1	1	0	0	0	0	0	0	1	1	1	0	0	0
15386218	1434.37	1433	1		1	0	0.30851	1	1	1	0	1	1	1	0	0	0	0	0	0	0	1	0	1	0	0	0	0	0	1	1	1	0	0	0
15386218	299.37	298	1		1	0	0.30851	1	1	1	1	1	1	1	0	0	0	0	0	0	0	1	0	1	0	0	0	0	0	1	0	0	0	0	0
15386218	492.469	493	1	1		0	0.39362	0	1	1	0	1	1	1	0	0	0	0	0	0	0	1	1	0	0	0	0	0	0	1	0	0	0	0	0
15386218	862.356	861	1		1	0	0.39362	1	1	1	0	1	1	1	0	0	0	0	0	0	0	1	1	1	0	0	0	0	0	1	0	0	0	0	0
15386218	559.323	572	1	0	0	1	0.43	1	1	1		1	1	1	0	0	0	0	0	0	0	0	0	0	0	0	0	0	0	0	0	0	0	0	0
15386218	1031.78	1031	1	1		1	0.39362	0	1	1	0	1	1	1	1	0	0	0	0	0	0	1	1	0	0	0	0	0	0	1	0	0	0	0	0
15386218	1400.36	1400	1		1	1	0.39362	1	1	1	0	1	1	1	0	0	0	0	0	0	0	1	1	0	0	0	0	0	0	1					0
15386218	352.366	351	1		1	0	0.39362	1	1	1	1	1	1	1	0	0	0	0	0	0	0	0	0	0	0	0	0	0	0	0	0	0	0	0	0
15386218	113.358	112	1	1		1	0.48936	0		0	1	1	1	0	0	1	0	0	0	0	0	0	0	0	0	0	0	0	0	0	0	0	0	0	0
15386218	481.545	481	1		1	1	0.48936	0		0	1	0	0	0	0	0	0	0	0	0	0	0	0	0	0	0	0	0	0	0	0	0	0	0	1
24514477	391.495	391	1	0	0	0	0.2	0	0	1		1	1	1	0	0	0	1	0	0	0	0	0	0	0	0	0	0	0	1					1
24514477	1334.33	1331	1		1	0	0.38298	1	0	1	0	1	1	1	0	0	0	0	0	0	0	1	1	0	0	1	1	0	0	1	1	1	1	1	0
24514477	1275.5	1275	1	0	0	0	0.2	0	0	1		1	1	1	0	0	0	1	0	0	0	1	1	0	0	1	1	0	0	1					0
24514477		2370	1		1	0	0.38298	0	0	1	0	1	1	0	1	0	0	0	0	0	0	0	0	0	0	0	0	0	0	0
24514477			1		1		0.38298		0	1	0	1	1	1	1	0	0	0	0	0	0	1	1	0	0	0	0	0	0	1	1	1	1	1
24514477	1394.5	1394	1	0	0	1	0.38	0	1	1		1	1	0	0	0	0	1	0	0	0	1	1	0	0	0	0	0	0	1					0
24514477	643.517	644	1	0	0	1	0.53	1	1	1		1	1	1	0	0	0	1	0	0	0	1	1	0	0	1	1	0	0	1	0	0	0	0	0
24514477		1372	1	1		1	0.60638	1	1	1	0	1	0	0	0	0	0	0	0	0	0	1	1	0	0	0	0	0	0	0
24514477	1586.33	1738	1		1	1	0.60638	1	1	1	0	1	1	1	1	0	0	0	0	0	0	1	1	0	0	0	0	0	0	1					0
24514477	759.355		1		1	0	0.41489	0		0	0																								0
15512716	465.385	465	1	1		1	0.2766	1			0	0	0	0	0	0	0	0	0	0	0	0	0	0	0	1	1	0	0	0	0	0	0	0	1
15512716	836.36	835	1		1	1	0.39362	1			0	1	1	0	1	0	0	0	0	0	0	1	1	0	0	0	0	0	0	1	1	1	1	1	1
15512716	1081.38	1082	1	1		1	0.2766	1			0	1	1	0	1	0	0	0	0	0	0	1	1	0	0	0	0	0	0	1	0	0	0	0	0
15512716	560.307	560	1	1		1	0.40426	0			0	0	0	0	0	0	0	0	0	0	0	0	0	0	0	0	0	0	0	0	0	0	0	0	0
15512716	885.39	884	1		1	1	0.45745	1			0	1	0	0	0	0	0	0	0	0	0	1	1	0	0	0	0	0	0	0	1	1	0	0	0
47712286	464.449	464	1	0	0	1	0.33	0	1	1		1	1	0	1	0	0	1	1	0	0	1	1	0	0	0	0	0	0	1					0
47712286	983.596	974	1	1		1	0.38298	0	1	1	0	1	0	0	0	0	0	0	0	0	0	1	1	0	0	0	0	0	0	0	0	0	0	0	0
47712286	923.603	922	1	1		1	0.38298	0	1	1	0	1	1	0	1	0	0	0	0	0	0	1	1	0	0	0	0	0	0	1	0	0	0	0	0
47712286	1268.58	1267	1		1	1	0.41489	0	1	1	0	1	1	1	0	0	0	0	0	0	0	1	1	1	0	1	1	0	0	1	0	0	0	0	0
43211746	376.457	374	1	0	0	0	0.49	0	1	1		1	1	0	0	0	0	0	1	0	0	0	0	0	0	0	0	0	0	0					1
43211746	922.564	914	1	1		0	0.46809	0	1	1	0	1	1	1	0	0	0	0	0	0	0	1	1	0	0	0	0	0	0	1	0	0	0	0	0
43211746	1285.42	1285	1		1	0	0.48936	0	1	1	0	1	1	1	0	0	0	1	0	0	0	1	1	0	0	0	0	0	0	1					0
43211746	792.474	790	1	0	0	0	0.54	0	1	1		0	0	0	0	0	0	0	0	0	0	0	0	0	0	0	0	0	0	0					0
43211746	1338.57	1330	1	1		0	0.45745	0	1	1	0	1	1	1	1	0	0	0	0	0	0	1	1	0	0	0	0	0	0	1	0	0	0	0	0
43211746	1701.44	1701	1		1	0	0.45745	0	1	1	0	1	1	1	0	0	0	0	0	0	0	1	1	0	0	0	0	0	0	1					0
75623441	722.435	517	1	1		0	0.45745	0		0	1	0	0	0	0	0	0	0	0	0	0	0	0	0	0	0	0	0	0	0	0	0	0	0	0
75623441		898	1		1	0	0.52128	0		0	1	0	0	0	0	0	0	0	0	0	0	0	0	0	0	0	0	0	0	0	1	0	1	0
75623441	656.537	655	1	0	0	0	0.42	1	1	1		1	1	0	1	1	0	0	0	0	0	1	1	0	0	1	1	0	0	1					0
75623441	1595.41	1595	1		1	0	0.42	0	1	1	0	1	1	1	0	0	0	0	0	0	0	1	1	0	0	0	0	0	0	1	1	1	0	0	0
75623441	449.422		1		1	0	0.52128	0		0	1																								0
18772488	43.3788	43	1	0	0	0	0.38	0	1	1		1	1	0	0	1	0	0	0	0	0	0	0	0	0	0	0	0	0	0	0	0	0	0	0
18772488	559.337	560	1	1		0	0.39362	1	1	1	0	1	0	0	0	0	0	0	0	0	0	1	0	1	0	0	0	0	0	0	0	0	0	0	0
18772488	1039.41	1042	1		1	0	0.39362	0	1	1	0	1	1	1	1	0	0	0	1	0	0	1	1	0	0	0	0	0	0	1	1	1	0	0	0
18772488	1225.39	1232	1	0	0	0	0.38	1	1	1		1	1	0	1	1	0	0	0	0	0	0	0	0	0	0	0	0	0	1	1	0	1	0	0
18772488	1741.33	1757	1	1		0	0.39362	1	1	1	0	1	1	1	0	0	0	0	0	0	0	1	1	0	0	0	0	0	0	1	0	0	0	0	0
18772488	2221.41	2302	1		1	0	0.39362	0	1	1	0	1	1	0	1	0	0	0	0	0	0	1	1	0	0	0	0	0	0	1					0
18772488	42.4226		1	0	0	1	0.38	1	1	1																									0
18772488	890.427	895	1	0	0	0	0.38	0	1	1		1	1	1	1	0	0	0	0	0	0	0	0	0	0	0	0	0	0	1	1	1	1	1	0
18772488	1406.35		1	1		0	0.39362	1	1	1	0																								0
18772488			1		1		0.48936			0	0	1	1	1	0	0	0	0	0	0	0	1	1	0	0	0	0	0	0	1
72721818	804.455	808	1	0	0	1	0.29	0	0	1		1	1	0	1	1	0	0	0	0	0	1	1	0	0	0	0	0	0	1	0	0	0	0	0
72721818	1349.51	1348	1	1		1	0.28723	1	0	1	0	1	1	1	0	0	0	0	1	0	0	1	1	0	0	1	1	0	0	1					0
72721818	1946.41	1896	1		1	1	0.28723	0	0	1	0	1	0	0	0	0	0	0	0	0	0	1	1	0	0	0	0	0	0	0					0
47846853	240.46	244	1	0	0	1	0.28	1	1	1		1	1	1	0	0	0	0	1	0	0	1	1	0	0	0	0	0	0	1	0	0	0	0	0
47846853	759.421	846	1	1		1	0.39362	0	1	1	0	1	1	1	1	0	0	0	0	0	0	1	1	0	0	0	0	0	0	1					0
47846853		1312	1		1	1	0.39362	0	1	1	0	1	1	1	0	0	0	0	0	0	0	0	0	0	0	0	0	0	0	0
47846853	732.455	732	1	0	0	0	0.29	1	1	1		1	1	0	1	0	0	0	0	0	0	1	1	0	0	0	0	0	0	1	1	1	0	0	0
47846853	1251.53	1339	1	1		0	0.41489	0	1	1	0	1	1	0	1	0	0	0	0	0	0	1	1	0	0	0	0	0	0	1	0	0	0	0	0
47846853	1638.52	1645	1		1	0	0.39362	0	1	1	0	1	0	0	0	0	0	0	0	0	0	1	1	0	0	0	0	0	0	0					0
47846853			1		1					0	0	1	1	1	1	0	0	0	0	0	0	0	0	0	0	0	0	0	0	1
68662463	324.584		1	0	0	1	0.67	0	1	1																									0
68662463	1063.38	1062	1		1	1	0.71277	1	1	1	0	0	0	0	0	0	0	0	0	0	0	0	0	0	0	0	0	0	0	0	0	0	0	0	0
27231813	330.538	331	1	1		0	0.52128	1		0	1	1	1	0	0	0	1	0	0	0	0	0	0	0	0	0	0	0	0	0	0	0	0	0	1
27231813	721.937	721	1		1	0	0.52128	1		0	1	0	0	0	0	0	0	0	0	0	0	0	0	0	0	0	0	0	0	0	0	0	0	0	1
27231813	834.954	834	1		1	1	0.52128	0		0	0	0	0	0	0	0	0	0	0	0	0	0	0	0	0	0	0	0	0	0	0	0	0	0	0
83124482			1		1		0.44681			0	0	0	0	0	0	0	0	0	0	0	0	0	0	0	0	0	0	0	0	0	0	0	0	0
83124482	1281.37		1	0	0	1	0.35	1	1	1																									0
83124482		2172	1		1	1	0.39362	1	1	1	0	1	1	1	0	0	0	0	0	0	0	1	1	0	0	0	0	0	0	1
88717618	951.499	950	1	0	0	1	0.47	0	1	1		1	1	0	0	0	0	1	0	0	0	0	0	0	0	0	0	0	0	0	0	0	0	0	0
18553385	788.528	787	1	0	0	0	0.6	1	1	1		1	1	1	0	0	0	0	0	0	0	1	1	0	0	0	0	0	0	1	1	1	0	0	0
18553385			1		1					0	0	0	0	0	0	0	0	0	0	0	0	0	0	0	0	0	0	0	0	0	0	0	0	0
21121417	124.014	123	1		1	0	0.55319	1		0	1	0	0	0	0	0	0	0	0	0	0	0	0	0	0	0	0	0	0	0					0
21121417	373.407		1	0	0	1	0.39	1	1	0																									0
21121417	748.35	748	1	1		1	0.39362	0	1	0	0	1	1	1	1	0	0	0	0	0	0	0	0	0	0	0	0	0	0	1					0
21121417		1136	1		1	1	0.3617	0	1	0	0	1	0	0	0	0	0	0	0	0	0	1	1	0	0	0	0	0	0	0	1	1	0	0
74265484	1386.5		1	0	0	1	0.3	0	1	1																									0
74265484	1847.39	1847	1	1		1	0.21277	0	1	1	0	1	1	1	1	0	0	0	0	0	0	1	1	0	0	0	0	0	0	1	1	1	0	0	0
74265484	369.376	391	1	1		0	0.21277	1	1	1	1	1	0	0	0	0	0	0	0	0	0	1	0	1	0	0	0	0	0	0	0	0	0	0	0
74265484	735.369	735	1		1	0	0.12766	1	1	1	1	1	1	1	0	0	0	0	0	0	0	0	0	0	0	0	0	0	0	0	0	0	0	0	0
78252386	1401.55	1401	1	0	0	1	0.43	1	1	1		1	1	1	0	0	0	0	0	0	0	1	1	0	0	0	0	0	0	1	1	1	1	1	0
78252386	477.569	477	1	0	0	0	0.37	1	1	1		1	1	1	0	1	0	0	0	0	0	1	1	0	0	0	0	0	0	1	1	0	1	0	1
78252386	847.354	852	1	1		0	0.30851	0	1	1	0	1	1	1	0	0	0	1	0	0	0	1	1	0	0	0	0	0	0	1	1	0	1	0	1
78252386	1158.57		1	0	0	1	0.37	1	1	1																									0
78252386	1528.36	1578	1	1		1	0.30851	0	1	1	0	1	0	0	0	0	0	0	0	0	0	1	1	0	0	0	0	0	0	0	1	1	1	1	0
78252386	263.365	264	1	1		1	0.30851	0	1	1	1	1	1	0	0	0	1	0	0	0	0	0	0	0	0	0	0	0	0	0	0	0	0	0	0
32258733	724.496	724	1	0	0		0.47	0	1	1																					0	0	0	0	0
32258733	1489.36	1628	1		1	0	0.41489	0	1	1	0	1	1	1	0	0	0	0	0	0	0	1	1	0	0	0	0	0	0	1					0
32258733	327.483	327	1	0	0	1	0.31	1	1	1		1	1	1	0	0	0	0	0	0	0	1	1	0	0	0	0	0	0	1	1	1	1	1	1
32258733	704.433	706	1	1		1	0.31915	1	1	1	0	1	1	1	1	0	0	0	0	0	0	1	1	0	0	0	0	0	0	1	1	1	1	1	0
32258733	1091.36	1091	1		1	1	0.44681	0	1	1	0	1	1	1	1	0	0	0	0	0	0	1	1	0	0	0	0	0	0	1					0
32258733	865.476	865	1	0	0	0	0.31	1	1	1																					0	0	0	0	0
32258733	1243.39	1242	1	1		0	0.31915	0	1	1	0	1	1	1	1	0	0	0	0	0	0	0	0	0	0	0	0	0	0	1					0
32258733	1629.34	1628	1		1	0	0.44681	0	1	1	0	1	1	1	0	0	0	0	0	0	0	1	1	0	0	0	0	0	0	1	1	1	0	0	0
32258733	1417.5		1	0	0	0	0.56	1	1	1																									0
38627676	271.347	270	1		1	1	0.39362	1		0	1	1	1	0	0	0	1	0	0	0	0	0	0	0	0	1	1	0	0	1	0	0	0	0	1
38627676	60.5229	84	1	0	0	0	0.45	1	1	1		1	1	0	1	0	0	0	0	0	0	0	0	0	0	0	0	0	0	0	0	0	0	0	0
38627676		458	1	1		0	0.41489	1	1	1	0	0	0	0	0	0	0	0	0	0	0	0	0	0	0	0	0	0	0	0	0	0	0	0
56752556	130	130	0	0	0	1	0.43	1	1	1		0	0	0	0	0	0	0	0	0	0	0	0	0	0	1	1	0	0	0	1	1	1	1	0
56752556	647	647	0	0	0	0	0.45	1	1	1		1	1	1	0	0	0	0	0	0	0	0	0	0	0	0	0	0	0	0	0	0	0	0	0
56752556	747		0	0	0	0	0.45	1	1	1																									0
56752556	692	693	0	0	0	0	0.51	1	1	1		1	1	1	0	0	0	0	0	0	0	0	0	0	0	0	0	0	0	0	1	1	1	1	0
45541538	402	402	1	0	0	1	0.33	1	1	1		1	1	0	1	0	0	0	0	0	0	0	0	0	0	0	0	0	0	0	0	0	0	0	0
45541538	808.422	808	1	1		1	0.34043	0	1	1	0	1	1	0	0	1	0	0	0	0	0	1	1	0	0	0	0	0	0	1	0	0	0	0	0
45541538	1169.66	1280	1		1	1	0.34043	1	1	1	0	0	0	0	0	0	0	0	0	0	0	0	0	0	0	0	0	0	0	0					0
45541538	463	463	1	0	0	0	0.33	1	1	1		1	1	0	1	0	1	0	0	0	0	1	1	0	0	0	0	0	0	1	0	0	0	0	0
64632741	85.3587	84	1	0	0	1	0.43	1	1	1		0	0	0	0	0	0	0	0	0	0	0	0	0	0	0	0	0	0	0	0	0	0	0	0
64632741	781.912	484	1	1		1	0.37234	0	1	1	0	0	0	0	0	0	0	0	0	0	0	0	0	0	0	0	0	0	0	0	0	0	0	0	0
64632741	859.491	848	1		1	1	0.39362	1	1	1	0	1	1	1	0	0	0	0	0	0	0	1	1	0	0	0	0	0	0	1					0
64632741	239.361	238	1	0	0	1	0.43	1	1	1		0	0	0	0	0	0	0	0	0	0	0	0	0	0	0	0	0	0	0	1	1	0	0	0
64632741	639.389	638	1	1		1	0.37234	1	1	1	0	1	1	1	0	0	0	0	0	0	0	1	1	0	0	1	1	0	0	1	0	0	0	0	1
64632741	1013.49	1001	1		1	1	0.39362	1	1	1	0	1	1	1	0	0	0	0	0	0	0	1	1	0	0	0	0	0	0	1	0	0	0	0	0
64632741	1019.36	1019	1	0	0	1	0.43	0	1	1		1	1	1	1	0	0	0	0	0	0	0	0	0	0	0	0	0	0	1	1	1	1	1	0
64632741	1475.49	1418	1	1		1	0.37234	0	1	1	0	1	1	1	0	0	0	0	0	0	0	1	1	0	0	0	0	0	0	1	1	1	0	0	0
64632741	1793.5	1782	1		1	1	0.39362	1	1	1	0	1	1	1	0	0	0	0	0	0	0	1	1	0	0	0	0	0	0	1	1	1	0	0	0
64632741	132.383	138	1	1		0	0.37234	1	1	1	1	0	0	0	0	0	0	0	0	0	0	0	0	0	0	0	0	0	0	0					0
64632741	505.567	501	1		1	0	0.39362	1	1	1	1	1	1	0	0	1	0	0	0	0	0	1	1	0	0	0	0	0	0	1	0	0	0	0	1
81725787	449.417	452	1	0	0	1	0.5	1	1	1		1	1	1	0	0	0	0	0	0	0	0	0	0	0	0	0	0	0	0	1	1	0	0	0
81725787	852.359		1	1		1	0.3617	1	1	1	0																								0
81725787		1217	1		1	1	0.41489	1	1	1	0	1	1	1	0	0	0	0	0	0	0	0	0	0	0	0	0	0	0	0	0	0	0	0
81631182	1419.51		1	0	0	1	0.53	0	1	1																									0
81631182	1819.38	1830	1	1		1	0.34043	0	1	1	0	0	0	0	0	0	0	0	0	0	0	0	0	0	0	0	0	0	0	0	0	0	0	0	0
81631182	2199.59	2361	1		1	1	0.38298	1	1	1	0	1	0	0	0	0	0	0	0	0	0	1	1	0	0	0	0	0	0	0					0
74217435	710.448	713	1	0	0	1	0.41	0	1	1		1	1	1	0	0	0	0	0	0	0	0	0	0	0	0	0	0	0	0					0
74217435	1115.42	1114	1	1		1	0.29787	0	1	1	0	1	1	1	1	0	0	0	0	0	0	1	1	0	0	0	0	0	0	1	1	1	1	1	0
74217435	360.409	358	1	1		1	0.29787	1	1	1	1	1	1	0	1	0	0	0	0	0	0	0	0	0	0	0	0	0	0	0	0	0	0	0	0
74217435	309.404	310	1	0	0	0	0.52	0	1	1		1	1	0	0	1	0	0	0	0	0	0	0	0	0	0	0	0	0	0	1	1	1	1	1
45556436	699.439		1	0	0	0	0.6	1	1	1																									0
45556436	807.378		1	0	0	1	0.53	1	1	1																									0
33443837	110.587	110	1	0	0	1	0.45	1	0	1		0	0	0	0	0	0	0	0	0	0	0	0	0	0	0	0	0	0	0	0	0	0	0	0
33443837		517	1	1		1	0.48936	1	0	1	0	1	0	0	0	0	0	0	0	0	0	1	1	0	0	0	0	0	0	0	1	1	0	0
33443837	441.589	441	1	0	0	0	0.45	1	0	1		0	0	0	0	0	0	0	0	0	0	0	0	0	0	0	0	0	0	0	0	0	0	0	0
86165512	122.416	123	1		1	1	0.39362	1		0	1	0	0	0	0	0	0	0	0	0	0	0	0	0	0	0	0	0	0	0					0
86165512	1291.53	1291	1	0	0	0	0.36	1	1	1		0	0	0	0	0	0	0	0	0	0	0	0	0	0	0	0	0	0	0	0	0	0	0	0
86165512	1700.5		1	1		0	0.31915	1	1	1	0																								0
86165512	2055.44	2056	1		1	0	0.31915	0	1	1	0	0	0	0	0	0	0	0	0	0	0	0	0	0	0	1	1	0	0	0	1	1	0	0	0
86165512	302.55	303	1	0	0	1	0.36	1	1	1		1	1	0	1	0	0	0	0	0	0	0	0	0	0	0	0	0	0	0	0	0	0	0	0
86165512	291.413	286	1		1	0	0.31915	1	1	1	1	0	0	0	0	0	0	0	0	0	0	0	0	0	0	1	1	0	0	0	0	0	0	0	1
86165512	1461.41	1462	1		1	1	0.31915	1	1	1	0	1	1	1	0	0	0	0	0	0	0	0	0	0	0	0	0	0	0	0	1	1	0	0	0
87285551	492.51	493	1	0	0	1	0.43	0	1	1		1	0	0	0	0	0	0	0	0	0	1	1	0	0	0	0	0	0	0	1	1	1	1	0
87285551	949.393	1135	1	1		1	0.39362	0	1	1	0	1	1	1	0	0	0	0	0	0	0	1	1	0	0	0	0	0	0	1					0
87285551	1270.34		1		1	1	0.44681	1	1	1	0																								1
87285551	1237.51	1238	1	0	0	0	0.43	0	1	1		1	0	0	0	0	0	0	0	0	0	1	1	0	0	0	0	0	0	0	0	0	0	0	0
87285551	1694.4	1880	1	1		0	0.39362	0	1	1	0	1	1	1	0	1	0	0	0	0	0	1	1	0	0	0	0	0	0	1					0
87285551	204.345	210	1		1	0	0.44681	1	1	1	1	0	0	0	0	0	0	0	0	0	0	0	0	0	0	0	0	0	0	0	0	0	0	0	0
87285551	531.53	532	1	0	0	1	0.53	1	1	1		0	0	0	0	0	0	0	0	0	0	0	0	0	0	0	0	0	0	0	1	0	1	0	1
64315724		774	1		1	0	0.41489	1	1	1	0	1	0	0	0	0	0	0	0	0	0	1	0	1	0	0	0	0	0	0	0	0	0	0
64315724		576	1	0	0	1	0.60638	1				1	1	1	0	0	0	0	0	0	0	1	1	0	0	0	0	0	0	1	0	0	0	0
64315724	903.368	901	1	1		1	0.60638	1			0	1	0	0	0	0	0	0	0	0	0	1	1	0	0	0	0	0	0	0	0	0	0	0	0
64315724	1304.41	1307	1		1	1	0.60638	1			0	1	1	1	0	0	0	0	0	0	0	1	1	1	0	0	0	0	0	1	1	1	1	1	1
64315724	267.468	268	1	1		1	0.38298	1			1	1	1	0	0	1	0	0	0	0	0	0	0	0	0	1	1	0	0	1	0	0	0	0	1
53515351	36.4096	40	1	0	0	0	0.52	0	1	1		0	0	0	0	0	0	0	0	0	0	0	0	0	0	0	0	0	0	0					0
53515351	445.422	441	1	1		0	0.35106	1	1	1	0	1	0	0	0	0	0	0	0	0	0	1	1	0	0	0	0	0	0	0	0	0	0	0	1
53515351			1	0	0		0.52		1	1		1	1	1	0	0	0	0	0	0	0	0	0	0	0	0	0	0	0	0
27368311	943.565	943	1	0	0	1	0.29	1	0	1		1	1	1	0	0	0	0	0	0	0	1	1	0	0	0	0	0	0	1					0
27368311		1720	1		1	1	0.24468	1	0	1	0	1	1	1	0	0	0	0	0	0	0	1	1	0	0	0	0	0	0	1	1	1	0	0
27368311	149.576		1	0	0	1	0.25	0	0	1																									0
27368311	925.359	926	1		1	1	0.38298	0	0	1	0	1	1	1	0	0	0	0	0	0	0	1	1	0	0	0	0	0	0	1	1	0	1	0	0
27368311	884.578		1	0	0	1	0.25	0	0	1																									0
27368311	1660.36		1		1	1	0.38298	0	0	1	0																								0
27368311			1		1		0.38298		0	1	0	1	1	1	0	0	0	0	0	0	0	1	1	1	0	0	0	0	0	1	0	0	0	0
27368311		538	1		1	0	0.41489	1			0	1	1	1	0	1	0	0	0	0	0	1	1	1	0	0	0	0	0	1	0	0	0	0
43538436	636.429	645	1	0	0	1	0.67	0	1	1		1	1	0	1	0	0	0	0	0	0	1	1	0	0	1	1	0	0	1	0	0	0	0	0
43538436	1013.49		1	1		1	0.34043	1	1	1	0																								0
43538436	108.436	117	1	0	0		0.44	1	1	1		0	0	0	0	0	0	0	0	0	0	0	0	0	0	0	0	0	0	0	0	0	0	0	0
43538436	190.42	188	1		1	1	0.44681	1			0	0	0	0	0	0	0	0	0	0	0	0	0	0	0	0	0	0	0	0	0	0	0	0	0
63764888	709.66	709	1	0	0	0	0.38	1	1	1		0	0	0	0	0	0	0	0	0	0	0	0	0	0	0	0	0	0	0	0	0	0	0	0
63764888		1334	1	1		0	0.43617	1	1	1	0	1	1	1	1	0	0	0	0	0	0	1	1	0	1	0	0	0	0	1
63764888	1536.44	1499	1		1	0	0.46809	0	1	1	0	1	1	0	1	0	0	0	0	0	0	0	0	0	0	1	1	0	0	1					0
63764888	946.431	946	1		1	0	0.46809	0	1	1	1	0	0	0	0	0	0	0	0	0	0	0	0	0	0	1	1	0	0	0	0	0	0	0	1
63764888	423.384	422	1		1	0	0.34043	1			1	1	1	0	0	0	1	0	0	0	0	0	0	0	0	0	0	0	0	0	0	0	0	0	0
63764888	412.476	430	1	1		1	0.32979	0			1	1	0	0	0	0	0	0	0	0	0	1	0	1	0	0	0	0	0	0	0	0	0	0	0
63764888		844	1		1	1	0.32979	0			1	1	0	0	0	0	0	0	0	0	0	1	1	0	0	0	0	0	0	0
85123384	185.688	185	0	0	0	0	0.4	0	1	0		1	1	0	0	0	1	0	0	0	0	0	0	0	0	1	1	0	0	1	0	0	0	0	0
85123384	249.352	253	0	1		0	0.25532	1			0	0	0	0	0	0	0	0	0	0	0	0	0	0	0	1	1	0	0	0	0	0	0	0	0
85123384	639.487		0		1	0	0.37234	1			0																								1
18578747	400.386	400	1		1	0	0.45745	1			1	1	1	0	0	0	0	1	0	0	0	0	0	0	0	1	1	0	0	1	0	0	0	0	1
87825857	1078.39		1	1		1	0.46809	1	1	1	0																								0
87825857	1446.36		1		1	1	0.46809	0	1	1	0																								0
87825857	136.358	176	1		1	1	0.46809	1	1	1	1	0	0	0	0	0	0	0	0	0	0	0	0	0	0	0	0	0	0	0	0	0	0	0	0
87825857	402.402	401	1	0	0	0	0.6	1	1	1		1	1	0	0	1	1	0	0	0	0	1	1	0	0	0	0	0	0	1	0	0	0	0	0
87825857	1147.35	1145	1		1	0	0.62766	1	1	1	0	1	1	0	1	0	0	0	0	0	0	1	1	0	0	0	0	0	0	1	0	0	0	0	1
87825857	340.413	339	1	0	0	1	0.6	0	1	1		0	0	0	0	0	0	0	0	0	0	0	0	0	0	0	0	0	0	0	0	0	0	0	0
87825857	639.424	638	1	0	0	1	0.39	0	1	1		1	0	0	0	0	0	0	0	0	0	1	1	0	0	0	0	0	0	0	0	0	0	0	0
87825857	1015.54		1	1		1	0.32979	0	1	1	0																								0
87825857	1384.38	1382	1		1	1	0.38298	0	1	1	0	1	1	1	0	0	0	1	0	0	0	1	1	0	0	0	0	0	0	1	1	1	1	1	0
87825857	111.606		1	1		1	0.32979	0	1	1	1																								0
87825857	438.373	435	1		1	1	0.38298	0	1	1	1	1	0	0	0	0	0	0	0	0	0	1	1	0	0	0	0	0	0	0	0	0	0	0	1
85768346	329.579	329	1	0	0	0	0.63	0	0	1		0	0	0	0	0	0	0	0	0	0	0	0	0	0	1	1	0	0	0	0	0	0	0	0
85768346	702.515	703	1	1		0	0.38298	0	0	1	0	1	1	1	0	0	0	0	0	0	0	1	1	0	0	0	0	0	0	1	1	0	1	0	0
85768346	1067.49	1071	1		1	0	0.34043	0	0	1	0	0	0	0	0	0	0	0	0	0	0	0	0	0	0	0	0	0	0	0	1	1	1	1	0
85768346	853.584	856	1	0	0	0	0.63	0	0	1		1	1	1	0	0	0	0	0	0	0	0	0	0	0	0	0	0	0	0	1	1	1	1	0
85768346	1226.51	1227	1	1		0	0.38298	0	0	1	0	1	1	1	0	0	0	0	0	0	0	1	1	0	0	0	0	0	0	1	1	0	1	0	0
85768346	1591.49		1		1	0	0.34043	0	0	1	0																								0
85768346	326.492	326	1		1	0	0.34043	0	0	1	1	0	0	0	0	0	0	0	0	0	0	0	0	0	0	0	0	0	0	0	1	0	1	0	0
85768346	120.567	120	1	0	0	1	0.41	0	1	1		0	0	0	0	0	0	0	0	0	0	0	0	0	0	0	0	0	0	0	0	0	0	0	0
85768346	744.318	680	1	1		1	0.53191	1			0	1	0	0	0	0	0	0	0	0	0	1	1	0	0	0	0	0	0	0	1	1	1	1	0
85768346	376.404	378	1		1	0	0.39362	0			1	0	0	0	0	0	0	0	0	0	0	0	0	0	0	0	0	0	0	0					0
34278482	828.421	830	1	0	0	1	0.47	0	1	1		1	0	0	0	0	0	0	0	0	0	1	1	0	0	0	0	0	0	0	0	0	0	0	0
34278482	1267.32		1	1		1	0.41489	1	1	1	0																								0
34278482	1571.6	1601	1		1	1	0.38298	0	1	1	0	1	1	0	1	0	0	0	0	0	0	1	1	0	0	1	1	0	0	1	1	0	1	0	0
34278482	286.328	286	1	1		0	0.41489	1	1	1	1	0	0	0	0	0	0	0	0	0	0	0	0	0	0	0	0	0	0	0	0	0	0	0	0
34278482	655.599	685	1		1	0	0.38298	1	1	1	1	1	0	0	0	0	0	0	0	0	0	1	1	0	0	1	1	0	0	1	0	0	0	0	0
34278482	781.498	781	1	0	0	0	0.4	0	1	1		1	1	1	0	0	0	0	0	0	0	1	1	0	0	0	0	0	0	1	0	0	0	0	0
34278482	1154.49	1155	1	1		0	0.31915	0	1	1	0	1	1	1	0	1	0	0	0	0	0	1	1	0	0	0	0	0	0	1	1	1	0	0	0
34278482	92.5368	97	1		1	1	0.30851	0	1	1	1	1	0	0	0	0	0	0	0	0	0	1	1	0	0	0	0	0	0	0					0
18512351	1131.45	1133	0	0	0	0	0.36	0	1	1		1	0	0	0	0	0	0	0	0	0	1	1	0	0	0	0	0	0	0	1	1	0	0	0
18512351	875.466	876	0	0	0	0	0.42	1	1	1		1	1	1	1	0	0	0	0	0	0	1	1	0	0	0	0	0	0	1	1	1	0	0	0
56538136	1275.41	1273	1	1		0	0.39362	1			0	1	1	1	0	0	0	0	0	0	0	1	1	0	0	0	0	0	0	1					0
56538136		1710	1		1	0	0.39362	1			0	1	1	1	0	0	0	0	0	0	0	1	1	0	0	0	0	0	0	1
56538136	1011.66	1013	1	0	0	1	0.48	1	1	1		1	1	1	0	0	0	0	0	0	0	1	1	0	0	0	0	0	0	1	1	1	0	0	0
56538136	1420.4	1419	1	1		1	0.30851	1	1	1	0	1	1	1	1	0	0	0	0	0	0	0	0	0	0	1	1	0	0	1	1	1	0	0	0
56538136	1796.58	1798	1		1	1	0.52128	1	1	1	0	1	1	1	0	0	0	0	0	0	0	0	0	0	0	0	0	0	0	0					0
56538136	416.293	415	1	1		0	0.30851	1	1	1	1	0	0	0	0	0	0	0	0	0	0	0	0	0	0	1	1	0	0	0	0	0	0	0	1
56538136	793.586	795	1		1	0	0.52128	1	1	1	1	1	1	1	0	0	0	0	0	0	0	0	0	0	0	1	1	0	0	1					0
56538136	1088.4	1087	1	0	0	1	0.36	1	1	1		1	1	1	0	0	0	0	0	0	0	1	1	0	0	0	0	0	0	1	0	0	0	0	0
56538136	358.349	359	1		1	1	0.45745	1	1	1	1	1	0	0	0	0	0	0	0	0	0	1	1	0	0	0	0	0	0	0					1
56538136			1	1		0	0.61702	1			1	1	1	1	1	0	0	0	0	0	0	1	1	0	0	1	1	0	0	1	1	1	0	0	1
83725576	1041.41	1043	1	0	0	1	0.3	0	1	0		1	1	0	1	0	0	0	0	0	0	1	1	0	0	0	0	0	0	1	0	0	0	0	0
83725576	1417.39	1415	1	1		1	0.30851	1	1	0	0	1	1	1	1	0	0	0	0	0	0	1	1	0	0	0	0	0	0	1	1	1	1	1	0
83725576	1782.31	1779	1		1	1	0.28723	0	1	0	0	1	1	1	0	0	0	0	0	0	0	1	1	0	0	0	0	0	0	1	1	1	0	0	0
83725576	348.349	349	1	1		0	0.20213	1			0	1	1	0	0	1	0	0	0	0	0	0	0	0	0	0	0	0	0	0	1	0	1	0	0
83725576	717.324	714	1		1	0	0.28723	0			0	1	1	1	0	0	0	0	0	0	0	1	1	1	0	0	0	0	0	1	1	1	0	0	0
34665148	581.403	580	1	1		1	0.57447	1			0	1	1	0	0	1	0	0	0	0	0	1	1	0	0	0	0	0	0	1	0	0	0	0	1
34665148	1256.43	943	1		1	1	0.39362	0			0	1	1	1	0	0	0	0	0	0	0	1	1	0	0	0	0	0	0	1	1	0	1	0	0
26712364	1394.45	1395	1	0	0	1	0.48	1	1	1		1	1	1	0	0	0	0	0	0	0	0	0	0	0	1	1	0	0	1	1	1	0	0	0
26712364	1774.41		1	1		1	0.41489	1	1	1	0																								0
26712364	2133.58	2134	1		1	1	0.46809	1	1	1	0	1	1	1	1	0	0	0	0	0	0	1	1	0	0	0	0	0	0	1	0	0	0	0	0
15326175	740.515		1	0	0	1	0.47	0	1	1																									0
15326175	1139.48	1145	1	1		1	0.39362	1	1	1	0	1	1	1	0	0	0	0	0	0	0	1	1	0	0	1	1	0	0	1	1	1	1	1	0
15326175	1524.6	1523	1		1	1	0.48936	0	1	1	0	1	1	1	1	0	0	0	0	0	0	0	0	0	0	0	0	0	0	1	1	1	0	0	0
15326175	840.525	836	1	0	0	0	0.43	1	1	1		1	1	1	0	0	0	0	0	0	0	1	1	0	0	0	0	0	0	1	1	0	1	0	0
15326175	1624.6	1623	1		1	0	0.39362	0	1	1	0	1	1	1	0	0	0	0	0	0	0	1	1	0	0	1	1	0	0	1	0	0	0	0	0
15326175	166.575	167	1	1		1	0.39362	1	1	1	1	0	0	0	0	0	0	0	0	0	0	0	0	0	0	0	0	0	0	0					0
15326175	551.609	550	1		1	1	0.39362	0	1	1	1	1	0	0	0	0	0	0	0	0	0	1	1	0	0	1	1	0	0	1	0	0	0	0	0
15326175	358.614	357	1		1	0	0.39362	0	1	1	1	1	1	0	0	0	1	0	0	0	0	0	0	0	0	1	1	0	0	1	0	0	0	0	0
33236573	90.4672	85	1		1	1	0.37234	0			1	0	0	0	0	0	0	0	0	0	0	0	0	0	0	0	0	0	0	0					0
71852435	1118.39	1119	0	0	0	0	0.46	0	1	1		1	1	0	1	0	0	0	0	0	0	1	1	0	0	0	0	0	0	1	0	0	0	0	0
71852435	1571.49		0	1		0	0.41489	0	1	1	0																								1
71852435	1979.53		0		1	0	0.43617	0	1	1	0	1	1	1	0	0	0	0	0	0	0	1	1	0	0	1	1	0	0	1	0	0	0	0	0
71852435			0	1			0.48936				0	1	1	0	1	0	0	0	0	0	0	0	0	0	0	0	0	0	0	0	1	0	1	0
64547551	135.438	131	0	0	0		0.6	1	1	1		0	0	0	0	0	0	0	0	0	0	0	0	0	0	0	0	0	0	0	0	0	0	0	0
64547551	352.412	352	0	1		0	0.55319	0	1	1	1	1	1	1	0	1	0	0	0	0	0	1	1	0	0	0	0	0	0	1					0
64547551	762.436	762	0		1	0	0.42553	0	1	1	1	1	0	0	0	0	0	0	0	0	0	1	1	0	0	1	1	0	0	1	1	1	0	0	0
64547551	125.424	64	0		1	0	0.52128	1			1	0	0	0	0	0	0	0	0	0	0	0	0	0	0	0	0	0	0	0	0	0	0	0	0
64547551	281.399	280	0		1	0	0.42553	0			1	1	0	0	0	0	0	0	0	0	0	1	1	0	0	1	1	0	0	1	0	0	0	0	1
41478771	1021.49	1021	1	0	0	1	0.34	0	1	1		1	1	1	0	0	0	0	0	0	0	0	0	0	0	0	0	0	0	0	1	1	1	1	0
41478771	1442.53	1442	1	1		1	0.32979	0	1	1	0	1	1	1	1	0	0	0	0	0	0	0	0	0	0	0	0	0	0	1	1	1	0	0	0
41478771	215.535		1	1		1	0.32979	0	1	1	1																								0
41478771	849.337	595	1		1	1	0.24468	0	1	1	1	1	0	0	0	0	0	0	0	0	0	1	1	0	0	1	1	0	0	1	1	1	0	0	0
63881862	424.428	424	1	0	0	1	0.43	0	1	1		0	0	0	0	0	0	0	0	0	0	0	0	0	0	0	0	0	0	0	0	0	0	0	0
63881862	1222.48		1		1	1	0.39362	1	1	1	0																								0
63881862	633.437	633	1	0	0	1	0.43	1	1	1		1	1	0	1	0	0	0	1	0	0	0	0	0	0	0	0	0	0	1	0	0	0	0	0
63881862	449.732	211	1	1		0	0.39362	1	1	1	1	0	0	0	0	0	0	0	0	0	0	0	0	0	0	0	0	0	0	0					0
38852464	222.393		1	0	0	1	0.55	0	1	1																									1
38852464	770.402	766	1	0	0	0	0.36	1	1	0		1	0	0	0	0	0	0	0	0	0	1	1	0	0	0	0	0	0	0	0	0	0	0	0
38852464	1192.46	1250	1	1		0	0.41489	1	1	0	0	1	1	1	0	0	0	0	0	0	0	1	1	0	0	0	0	0	0	1	0	0	0	0
38852464	1049.4	1045	1	0	0	0	0.36	1	1	0		0	0	0	0	0	0	0	0	0	0	0	0	0	0	0	0	0	0	0	1	1	0	0	0
38852464	1471.47		1	1		0	0.41489	1	1	0	0																								0
38852464	1793.58		1		1	0	0.39362	1	1	0	0	1	1	1	0	0	0	0	0	0	0	1	1	0	0	0	0	0	0	1	0	0	0	0	0
78228716	757.466	757	1	0	0	1	0.37	0	1	1																									0
78228716	531.479	531	1	0	0	0	0.36	0	0	1		0	0	0	0	0	0	0	0	0	0	0	0	0	0	0	0	0	0	0	1	0	1	0	0
78228716	936.377	1060	1	1		0	0.41489	0	0	1	0	1	1	1	1	0	0	0	0	0	0	0	0	0	0	0	0	0	0	1	1	1	1	1	0
78228716	1334.31		1		1	0	0.41489	1	0	1	0																								0
78228716	1009.48	1009	1	0	0	1	0.36	0	0	1		1	1	1	0	0	0	0	0	0	0	1	1	0	0	0	0	0	0	1	1	1	0	0	0
78228716	1414.38	1538	1	1		1	0.41489	0	0	1	0	1	1	1	1	0	0	0	0	0	0	0	0	0	0	0	0	0	0	1	1	1	1	1	0
34581322	159.414		1	0	0	0	0.43	1	1	1																									0
34581322	561.442	687	1	1		0	0.19149	1	1	1	0	1	1	1	1	0	0	0	0	0	0	0	0	0	0	0	0	0	0	1	1	1	1	1	0
34581322	952.376	953	1		1	0	0.095745	1	1	1	0	1	1	1	0	0	1	0	1	0	0	0	0	0	0	0	0	0	0	1	1	1	0	0	1
34581322	232.426	232	1	0	0	0	0.43	0	1	1		1	1	0	0	0	1	0	0	0	0	0	0	0	0	1	1	0	0	1	0	0	0	0	1
34581322	635.366	757	1	1		0	0.71277	1	1	1	0	1	1	1	0	1	0	0	0	0	0	1	1	0	0	0	0	0	0	1	1	1	0	0	0
34581322	1290.52	1025	1		1	0	0.44681	0	1	1	0	1	1	1	0	1	0	0	0	0	0	1	0	0	1	0	0	0	0	1	1	1	1	1	0
34581322	757.433	757	1	0	0	1	0.43	1	1	1		1	1	1	0	0	0	0	0	0	0	1	1	0	0	0	0	0	0	1	1	1	0	0	0
34581322	1282.39	1292	1	1		1	0.71277	1	1	1	0	1	1	1	0	0	0	0	0	0	0	1	1	0	1	0	0	0	0	1					0
34581322	1550.35	1551	1		1	1	0.44681	1	1	1	0	1	1	1	0	0	0	0	0	0	0	1	1	0	0	0	0	0	0	1	1	1	0	0	0
34581322	261.444		1	0	0	0	0.45	0	1	1																									1
34581322	663.461	663	1	1		0	0.40426	0	1	1	0	1	1	1	1	1	0	0	0	0	0	0	0	0	0	1	0	1	0	1	1	1	0	0	0
34581322	1054.37	1054	1		1	0	0.43617	0	1	1	0	1	1	1	1	1	0	0	0	0	0	1	1	0	0	0	0	0	0	1	1	1	0	0	0
26247714	879.455	875	0	0	0	1	0.45	1	1	1		1	1	1	1	0	0	0	0	0	0	1	1	0	0	0	0	0	0	1	1	1	0	0	0
26247714	644.382	644	0		1	1	0.39362	1	1	1	1	1	1	1	0	0	0	0	0	0	0	0	0	0	0	0	0	0	0	0	1	1	1	1	0
26247714	359.361	358	0		1	1	0.3617	0			1	1	1	1	1	0	0	0	0	0	0	0	0	0	0	0	0	0	0	1	0	0	0	0	0
26247714			0		1		0.3617				0	1	0	0	0	0	0	0	0	0	0	1	1	1	0	0	0	0	0	1	0	0	0	0
26247714	402.364	404	0		1	1	0.3617	0			1	1	1	1	1	0	0	0	0	0	0	1	1	0	0	0	0	0	0	1					0
24435322	85.4726		1	0	0	1	0.45	0	1	1																									0
24435322	515.504	474	1	1		1	0.46809	0	1	1	0	1	1	0	1	0	0	0	0	0	0	0	0	0	0	0	0	0	0	0	0	0	0	0	0
24435322	1132.47	1135	1	0	0	0	0.45	0	1	1		0	0	0	0	0	0	0	0	0	0	0	0	0	0	0	0	0	0	0	0	0	0	0	0
24435322	1562.52	1520	1	1		0	0.46809	0	1	1	0	1	1	1	1	0	0	0	0	0	0	0	0	0	0	0	0	0	0	1	1	1	0	0	0
24435322	1008.48		1	0	0	1	0.39	0	1	1																									0
24435322	2072.52	1794	1		1	1	0.45745	0	1	1	0	1	1	1	0	0	0	0	0	0	0	1	1	0	0	0	0	0	0	1	1	1	0	0	0
24435322	656.408	369	1	1		0	0.35106	0	1	1	1	1	1	0	1	0	0	0	0	0	0	0	0	0	0	0	0	0	0	0	0	0	0	0	0
24435322	1044.53		1		1	0	0.45745	0	1	1	1																								0
81143143	252.424	252	1	0	0	0	0.63	0	1	1		1	0	0	0	0	0	0	0	0	0	1	1	0	0	0	0	0	0	0	0	0	0	0	1
81143143	681.525	642	1	1		0	0.60638	1	1	1	0	1	1	1	1	0	0	0	0	0	0	1	1	0	0	0	0	0	0	1	0	0	0	0	0
81143143	1051.33	1052	1		1	0	0.57447	0	1	1	0	1	1	1	0	0	0	0	0	0	0	1	1	0	0	0	0	0	0	1	1	1	1	1	0
81143143	447.532	438	1	1		1	0.60638	1			1	1	1	1	1	0	0	0	0	0	0	1	1	0	0	0	0	0	0	1	0	0	0	0	0
81143143	817.344	818	1		1	1	0.60638	1			1	1	1	1	0	0	0	0	0	0	0	1	1	0	0	1	1	0	0	1	1	1	1	1	0
67678141	376.464	383	1	0	0	1	0.56	1	1	1		1	1	0	1	0	0	0	0	0	0	0	0	0	0	0	0	0	0	0	0	0	0	0	0
67678141	767.435	766	1	1		1	0.52128	1	1	1	0	1	1	1	0	0	0	0	0	0	0	1	1	0	0	0	0	0	0	1	0	0	0	0	0
67678141	1438.42	1123	1		1	1	0.52128	1	1	1	0	1	0	0	0	0	0	0	0	0	0	1	1	0	0	1	1	0	0	1	0	0	0	0	0
85171545	487.471	487	1	0	0	1	0.4	1	1	1		0	0	0	0	0	0	0	0	0	0	0	0	0	0	0	0	0	0	0	1	0	1	0	0
85171545	871.443	960	1	1		1	0.42553	0	1	1	0	1	1	1	0	0	0	0	0	0	0	1	1	0	0	0	0	0	0	1	0	0	0	0	0
85171545	1201.33	1286	1		1	1	0.48936	1	1	1	0	1	1	1	1	0	0	0	0	0	0	1	0	1	1	0	0	0	0	1					0
85171545	1048.47	1048	1	0	0	0	0.4	1	1	1		1	1	0	1	0	0	0	0	0	0	1	1	0	0	0	0	0	0	1	1	1	0	0	0
85171545	1432.45	1521	1	1		0	0.42553	0	1	1	0	0	0	0	0	0	0	0	0	0	0	0	0	0	0	0	0	0	0	0	1	0	1	0	0
85171545	1762.34		1		1	0	0.48936	1	1	1	0	1	1	1	0	1	0	0	0	0	0	1	1	0	1	0	0	0	0	1					0
35266388	343.422	343	1	0	0	0	0.51	1	1	0		1	0	0	0	0	0	0	0	0	0	1	0	1	0	0	0	0	0	0	0	0	0	0	0
35266388	132.453	139	1	1		0	0.53191	1	1	0	1	0	0	0	0	0	0	0	0	0	0	0	0	0	0	0	0	0	0	0	0	0	0	0	0
35266388	508.543	506	1		1	0	0.60638	1	1	0	1	1	1	0	0	0	1	0	0	0	0	0	0	0	0	0	0	0	0	0	0	0	0	0	0
64188553	862.426		1	0	0	1	0.42	1	1	0																									0
64188553	1620.61	1619	1		1	1	0.28723	1	1	0	0	1	1	1	0	0	0	0	0	0	0	1	1	0	0	1	1	0	0	1	1	1	1	1	0
64188553			1	0	0		0.42	0	1	0		1	1	1	1	0	0	0	0	0	0	1	1	0	0	0	0	0	0	1	1	1	1	1	0
64188553	906.331	905	1	1		1	0.38298	1	1	0	0	1	1	1	0	0	0	0	0	0	0	1	1	0	0	0	0	0	0	1	1	1	0	0	0
64188553	1276.49	1358	1		1	1	0.28723	0	1	0	0	1	1	1	0	0	0	0	0	0	0	1	1	0	0	0	0	0	0	1					0
21214588	306.399	308	1	0	0	0	0.5	1	1	1		1	1	1	1	0	0	0	0	0	0	0	0	0	0	1	1	0	0	1	1	1	0	0	1
21214588	733.3	732	1	1		0	0.46809	0	1	1	0	0	0	0	0	0	0	0	0	0	0	0	0	0	0	1	1	0	0	0	1	0	1	0	1
21214588	1109.37	1106	1		1	0	0.41489	0	1	1	0	1	1	0	0	1	0	0	0	0	0	1	1	0	0	0	0	0	0	1	0	0	0	0	1
21214588	1138.41	1138	1	0	0	0	0.5	1	1	1		1	1	1	0	0	0	0	0	0	0	1	1	1	0	0	0	0	0	1	0	0	0	0	1
21214588	1565.3		1	1		0	0.46809	0	1	1	0																								0
21214588	1941.38	1940	1		1	0	0.41489	0	1	1	0	1	1	1	0	0	0	0	0	0	0	1	1	0	0	1	1	0	0	1	1	1	1	1	0
21214588	109.353	109	1	1		1	0.46809	1	1	1	1	1	0	0	0	0	0	0	0	0	0	1	1	0	0	0	0	0	0	0	1	1	0	0	0
21214588	487.377	484	1		1	1	0.41489	0	1	1	1	1	1	0	0	1	0	0	0	0	0	1	1	0	0	0	0	0	0	1	1	1	1	1	0
21214588	865.678	870	1	0	0	1	0.56	0	1	1		1	1	1	1	0	0	0	0	0	0	1	1	0	0	0	0	0	0	1					0
21214588	715.364	715	1	1		0	0.48936	0			0	1	1	1	0	0	0	0	0	0	0	1	1	0	0	0	0	0	0	1	1	1	0	0	1
21214588	913.392	914	1	1		1	0.45745	0			0	1	1	1	0	0	0	0	0	0	0	1	1	0	0	0	0	0	0	1					1
21214588	904.468	904	1		1	0	0.41489	0			1	1	1	1	1	0	0	0	0	0	0	1	1	0	0	0	0	0	0	1	1	1	1	1	0
32246655	1468.45	1468	1	0	0	1	0.5	1	1	0		1	1	1	0	1	0	0	0	0	0	1	1	0	0	0	0	0	0	1	0	0	0	0	0
32246655	1900.37	1900	1	1		1	0.43617	1	1	0	0	1	1	1	0	0	0	0	0	0	0	1	1	0	1	0	0	0	0	1	0	0	0	0	0
32246655		2325	1		1	1	0.43617	1	1	0	0	1	1	1	0	0	0	0	0	0	0	1	1	0	0	0	0	0	0	1
83825341	936.601	936	1	0	0	1	0.34	1	0	1		1	0	0	0	0	0	0	0	0	0	1	1	0	0	0	0	0	0	0	0	0	0	0	0
83825341	1122.4	1121	1	1		1	0.31915	0	0	1	0	1	1	1	0	0	0	0	0	0	0	1	1	0	0	0	0	0	0	1	0	0	0	0	0
83825341	1472.37	1474	1		1	1	0.39362	0	0	1	0	1	0	0	0	0	0	0	0	0	0	1	1	0	0	0	0	0	0	0	1	0	1	0	1
83825341	1237.6	1237	1	0	0	1	0.34	1	0	1		1	1	0	1	0	0	0	0	0	0	1	1	0	0	0	0	0	0	1	0	0	0	0	0
83825341	1423.41	1422	1	1		1	0.31915	0	0	1	0	1	0	0	0	0	0	0	0	0	0	1	1	0	0	1	1	0	0	1	0	0	0	0	0
83825341	1773.38	1775	1		1	1	0.39362	0	0	1	0	1	1	1	1	0	0	0	0	0	0	1	1	0	0	0	0	0	0	1	1	0	1	0	0
43712672	402.627	402	1	0	0	1	0.51	1	1	0		0	0	0	0	0	0	0	0	0	0	0	0	0	0	0	0	0	0	0	1	1	0	0	1
43712672	942.777	941	1	1		1	0.44681	1	1	0	0	1	1	1	0	0	0	0	0	0	0	1	1	0	0	1	1	0	0	1	1	1	0	0	0
43712672	347.772	340	1	1		0	0.44681	1	1	0	1	1	0	0	0	0	0	0	0	0	0	1	1	0	0	0	0	0	0	0	0	0	0	0	1
43712672	852.639	852	1	0	0	0	0.4	1	1	1		1	1	1	0	0	0	0	0	0	0	0	0	0	0	0	0	0	0	0	1	1	0	0	1
43712672	1324.4	1418	1	1		0	0.41489	1	1	1	0	1	0	0	0	0	0	0	0	0	0	1	1	0	0	1	1	0	0	1					0
45318772	721.935	721	1	0	0	0	0.48	1	0	1		1	1	1	1	0	0	0	0	0	0	1	1	0	0	0	0	0	0	1	1	1	1	1	0
57748575	265.551		1	1		0	0.34043	0			1																								1
57748575		420	1		1	0	0.38298	0			1	1	1	1	0	0	0	0	0	0	0	1	1	0	0	0	0	0	0	1
57748575			1		1		0.38298				0	1	1	1	0	0	0	0	0	0	0	1	1	0	0	0	0	0	0	1
62256155	738.548	738	1	0	0	0	0.53	1	1	1		1	1	1	1	0	0	0	0	0	0	1	1	0	0	0	0	0	0	1	0	0	0	0	1
62256155	704.56	704	1	0	0	0	0.5	0	1	1		1	1	1	1	0	0	1	0	1	0	0	0	0	0	0	0	0	0	1	1	1	0	0	0
62256155		1062	1	1		0	0.39362	0	1	1	0	1	1	1	1	0	0	0	0	0	0	0	0	0	0	0	0	0	0	1	0	0	0	0
62256155	183.475	137	1	1		0	0.48936	1			1	0	0	0	0	0	0	0	0	0	0	0	0	0	0	0	0	0	0	0					0
67451214	184.506	185	1	0	0	0	0.45	0	1	1		0	0	0	0	0	0	0	0	0	0	0	0	0	0	0	0	0	0	0	0	0	0	0	0
67451214	551.318	552	1	1		0	0.41489	1	1	1	0	1	1	1	0	0	0	0	0	0	0	1	1	0	0	0	0	0	0	1	0	0	0	0	0
67451214	943.589	941	1		1	0	0.39362	1	1	1	0	1	0	0	0	0	0	0	0	0	0	1	1	0	0	0	0	0	0	0	0	0	0	0	0
67451214	484.597	482	1		1	0	0.39362	0	1	1	1	1	0	0	0	0	0	0	0	0	0	1	1	0	0	0	0	0	0	0	0	0	0	0	0
67451214	1025.52		1	0	0	1	0.56	1	1	1																									0
67451214	1415.44	1393	1	1		1	0.41489	1	1	1	0																								0
48868563	76.5274	78	0	0	0	1	0.38	0	0	1		1	1	0	0	0	1	0	0	0	0	0	0	0	0	0	0	0	0	0	0	0	0	0	0
48868563	485.553	485	0	1		1	0.42553	0	0	1	0	1	1	0	1	0	0	0	1	0	0	0	0	0	0	1	1	0	0	1					0
48868563		1039	0		1	1	0.42553	0	0	1	0	1	1	1	0	0	0	0	0	0	0	0	0	0	0	0	0	0	0	0
53835331	414.5	415	1	0	0	0	0.43	0	1	1		1	0	0	0	0	0	0	0	0	0	1	1	0	0	0	0	0	0	0	1	1	1	1	0
53835331	828.582	829	1	1		0	0.46809	1	1	1	0	1	1	1	0	0	0	0	0	0	0	1	1	0	0	0	0	0	0	1	1	1	0	0	0
35544276	428.475	428	1	0	0	0	0.65	0	0	1		1	0	0	0	0	0	0	0	0	0	1	1	0	0	0	0	0	0	0	0	0	0	0	0
35544276	1162.38	1161	1		1	0	0.55319	0	0	1	0	1	1	0	0	1	0	0	0	0	0	1	1	0	0	1	1	1	0	1	0	0	0	0	0
35544276	899.477	906	1	0	0	0	0.65	0	0	1		1	1	1	0	0	0	0	0	0	0	1	1	0	0	1	1	0	0	1					0
35544276	1632.42		1		1	0	0.55319	0	0	1	0																								0
35544276	327.38	328	1		1	0	0.55319	0	0	1	1																								0
35544276	180.487	180	1	0	0	1	0.39	1	0	1		0	0	0	0	0	0	0	0	0	0	0	0	0	0	1	1	0	0	0	0	0	0	0	1
35544276	566.395		1	1		1	0.39	0	0	1	0																								0
35544276	914.4	914	1		1	1	0.39362	1	0	1	0	1	0	0	0	0	0	0	0	0	0	1	1	0	0	0	0	0	0	0	0	0	0	0	0
35544276	132.586	104	1	1		1	0.39	1	0	1	1	0	0	0	0	0	0	0	0	0	0	0	0	0	0	0	0	0	0	0	0	0	0	0	0
35544276	481.403	480	1		1	1	0.39362	1	0	1	1	1	0	0	0	0	0	0	0	0	0	1	1	0	0	0	0	0	0	0	0	0	0	0	0
75517325	501.463	500	1	0	0	0	0.4	0	1	1		1	0	0	0	0	0	0	0	0	0	1	1	0	0	0	0	0	0	0	1	0	1	0	1
75517325	995.465	1110	1	1		0	0.34043	0	1	1	0	1	1	1	0	0	0	0	0	0	0	0	0	0	0	0	0	0	0	0					0
75517325	1522.42	1537	1		1	0	0.41489	0	1	1	0	0	0	0	0	0	0	0	0	0	0	0	0	0	0	0	0	0	0	0					0
75517325	501.467	633	1	0	0	0	0.4	0	1	1		1	0	0	0	0	0	0	0	0	0	1	1	0	0	0	0	0	0	0	0	0	0	0	1
75517325	995.469	1110	1	1		0	0.34043	0	1	1	0	1	1	0	1	0	0	0	0	0	0	1	1	0	0	0	0	0	0	1					0
75517325	1522.42	1391	1		1	0	0.41489	0	1	1	0	1	1	0	1	0	1	0	0	0	0	0	0	0	0	0	0	0	0	1					0
75517325	339.485	338	1	0	0	1	0.49	1	1	1		1	1	0	1	0	1	0	0	0	0	0	0	0	0	0	0	0	0	1	0	0	0	0	0
75517325	844.635	844	1	0	0	0	0.42	0	1	1		1	0	0	0	0	0	0	0	0	0	1	1	0	1	0	0	0	0	1	0	0	0	0	0
75517325	1341.55	1338	1	1		0	0.41489	1	1	1	0	1	1	1	1	0	0	0	0	0	0	1	1	0	1	0	0	0	0	1					0
75517325	1857.52	1759	1		1	0	0.48936	0	1	1	0	1	1	1	1	0	0	0	0	0	0	1	1	0	1	0	0	0	0	1					0
75517325	107.427	106	1		1	0	0.26596	0			1	0	0	0	0	0	0	0	0	0	0	0	0	0	0	0	0	0	0	0					0
75517325	323.642	323	1	0	0	0	0.46	0	1	1		1	1	0	1	0	0	0	0	0	0	1	1	0	1	0	0	0	0	1	0	0	0	0	1
75517325	818.474	931	1	1		0	0.29787	0	1	1	0	0	0	0	0	0	0	0	0	0	0	0	0	0	0	0	0	0	0	0					0
75517325	1336.53	1338	1		1	0	0.45745	0	1	1	0	1	1	1	0	0	0	0	0	0	0	1	1	0	1	0	0	0	0	1					0
35676447	493.577	494	1	0	0	0	0.4	0	0	1		0	0	0	0	0	0	0	0	0	0	0	0	0	0	0	0	0	0	0	0	0	0	0	0
35676447	63.5913	64	1	0	0	0	0.51	1	0	1		0	0	0	0	0	0	0	0	0	0	0	0	0	0	0	0	0	0	0	0	0	0	0	0
35676447	591.456	586	1	1		0	0.53191	1	0	1	0	1	0	0	0	0	0	0	0	0	0	1	1	0	0	0	0	0	0	0	1	1	0	0	0
35676447	1070.51	982	1		1	0	0.47872	1	0	1	0	1	1	1	0	0	0	0	0	0	0	0	0	0	0	0	0	0	0	0	0	0	0	0	1
35676447	575.462	570	1	1		1	0.39362	0			0	1	1	1	1	0	0	0	0	0	0	0	0	0	0	0	0	0	0	1	0	0	0	0	0
48436855	77.5417	77	1	0	0	1	0.33	0	0	1		0	0	0	0	0	0	0	0	0	0	0	0	0	0	0	0	0	0	0	0	0	0	0	0
48436855	643.368	589	1	1		1	0.39362	0	0	1	0	1	1	1	1	0	0	0	0	0	0	1	1	0	0	0	0	0	0	1					0
48436855	988.451	616	1		1	1	0.35106	0	0	1	0	1	0	0	0	0	0	0	0	0	0	1	1	0	0	0	0	0	0	0	0	0	0	0	0
48436855	1550.54	1550	1	0	0	0	0.33	0	0	1		1	1	1	0	0	0	0	0	0	0	0	0	0	0	0	0	0	0	0	1	1	0	0	0
48436855	2461.45	2454	1		1	0	0.35106	0	0	1	0	0	0	0	0	0	0	0	0	0	0	0	0	0	0	0	0	0	0	0	0	0	0	0	0
48436855	1091.56	1091	1	0	0	1	0.38	0	0	1		1	1	1	0	0	0	0	0	0	0	1	1	0	0	0	0	0	0	1	0	0	0	0	0
51652417	1409.61	1411	1	0	0	1	0.53	0	1	1		1	0	0	0	0	0	0	0	0	0	1	1	0	0	0	0	0	0	0	0	0	0	0	0
51652417	1792.38	1791	1	1		1	0.53	0	1	1	0	1	0	0	0	0	0	0	0	0	0	1	1	0	0	0	0	0	0	0	0	0	0	0	0
51652417		2183	1		1	1	0.44681	0	1	1	0	0	0	0	0	0	0	0	0	0	0	0	0	0	0	0	0	0	0	0
51652417	391.384		1	1		1	0.53	0	1	1	1																								0
51652417	782.35	783	1		1	1	0.44681	0	1	1	1	1	0	0	0	0	0	0	0	0	0	1	1	0	0	0	0	0	0	0					0
51652417	1121.29	1122	1		1	1	0.3617	0			0	1	1	1	0	0	0	0	0	0	0	1	1	0	0	0	0	0	0	1					1
53118856	254.324	253	1	0	0	0	0.4	0	0	1																									0
53118856	618.513	613	1	1		0	0.55319	0	0	1	0	0	0	0	0	0	0	0	0	0	0	0	0	0	0	0	0	0	0	0	0	0	0	0	0
53118856	983.356	983	1		1	0	0.44681	0	0	1	0	0	0	0	0	0	0	0	0	0	0	0	0	0	0	0	0	0	0	0	0	0	0	0	0
53118856			1		1		0.44681		0	1	0	1	1	1	1	0	0	0	0	0	0	1	1	0	0	0	0	0	0	1
53118856	1178.56	1177	1	0	0	1	0.37	0	0	1		1	1	1	0	0	0	0	0	0	0	1	1	0	0	1	1	0	0	1	0	0	0	0	0
53118856	1915.33	1917	1		1	1	0.45745	0	0	1	0	0	0	0	0	0	0	0	0	0	0	0	0	0	0	0	0	0	0	0	0	0	0	0	0
48135655	299.458	299	1	0	0	1	0.27	0	0	0		1	0	0	0	0	0	0	0	0	0	1	1	1	0	1	0	1	0	1					0
48135655	788.465	788	1	1		1	0.42553	0	0	0	0	1	1	1	0	0	0	0	0	0	0	1	1	0	0	0	0	0	0	1	1	1	1	1	0
48135655	1305.48	1209	1		1	1	0.42553	0	0	0	0	1	1	1	0	0	0	0	0	0	0	1	1	0	0	0	0	0	0	1	1	1	1	1	0
48135655	1499.47	1499	1	0	0	1	0.27	0	0	0																									0
48135655	1988.47	1989	1	1		1	0.42553	0	0	0	0	1	1	1	0	0	0	0	0	0	0	1	1	0	0	0	0	0	0	1	1	1	1	1	0
48135655	2505.49		1		1	1	0.42553	0	0	0	0																								0
48135655	1068.38	1068	1	0	0	0	0.43	0	0	0		1	0	0	0	0	0	0	0	0	0	1	1	0	0	0	0	0	0	0	1	1	0	0	0
48135655	327.4	327	1	0	0	1	0.43	0	0	0		1	0	0	0	0	0	0	0	0	0	1	1	1	0	1	0	0	1	1	0	0	0	0	0
48135655	1018.49	928	1		1	0	0.41489	0			0	0	0	0	0	0	0	0	0	0	0	0	0	0	0	0	0	0	0	0					0
48135655			1		1		0.41489				0	1	1	1	1	0	0	0	0	0	0	1	1	0	0	0	0	0	0	1	1	1	1	1
72281534	167.525	167	0	0	0	1	0.47	1	0	1		0	0	0	0	0	0	0	0	0	0	0	0	0	0	0	0	0	0	0	0	0	0	0	0
72281534	685.419	690	0	1		1	0.48936	0	0	1	0	1	1	0	1	0	0	1	0	0	0	0	0	0	0	0	0	0	0	1	0	0	0	0	0
72281534	1024.47	1025	0		1	1	0.44681	1	0	1	0	1	1	0	0	1	0	0	0	0	0	0	0	0	0	0	0	0	0	0	0	0	0	0	0
86622883	1066.5	1066	1	0	0	1	0.34	1	1	1		1	0	0	0	0	0	0	0	0	0	1	1	0	0	0	0	0	0	0	1	1	0	0	0
86622883	1555.55	1621	1	1		1	0.38298	0	1	1	0																								0
86622883		2100	1		1	1	0.46809	0	1	1	0	1	1	1	0	0	0	0	0	0	0	1	1	0	0	0	0	0	0	1
86622883	1115.52	1116	1	0	0	0	0.44	0	0	1		1	1	1	0	0	0	0	0	0	0	1	1	0	0	0	0	0	0	1	0	0	0	0	0
86622883		2149	1		1	0	0.34043	0	0	1	0	1	0	0	0	0	0	0	0	0	0	1	1	0	0	0	0	0	0	0
86622883			1		1		0.34043		0	1	0	1	1	1	0	0	0	0	0	0	0	1	1	0	0	1	1	0	0	1	0	0	0	0
84251524	878.493	879	1	0	0	0	0.4	0	0	1		0	0	0	0	0	0	0	0	0	0	0	0	0	0	0	0	0	0	0	0	0	0	0	0
84251524	1619.42	1617	1		1	0	0.60638	1	0	1	0	1	0	0	0	0	0	0	0	0	0	1	1	0	0	0	0	0	0	0	1	1	0	0	1
66471472	1299.44	1298	1	0	0	0	0.53	1	0	1		1	1	1	1	0	0	0	0	0	0	1	1	0	0	0	0	0	0	1	1	1	0	0	0
66471472	1677.58	1872	1	1		0	0.57447	1	0	1	0	0	0	0	0	0	0	0	0	0	0	0	0	0	0	0	0	0	0	0					0
66471472	2060.5	2048	1		1	0	0.48936	1	0	1	0	1	1	1	1	0	0	0	0	0	0	1	1	0	0	0	0	0	0	1	1	1	0	0	0
66471472	262.507	250	1		1	0	0.48936	1	0	1	1	0	0	0	0	0	0	0	0	0	0	0	0	0	0	0	0	0	0	0	0	0	0	0	0
76576627	485.548	613	1	1		1	0.55319	0	1	1	0	1	1	0	1	0	0	0	0	0	0	0	0	0	0	0	0	0	0	0					0
76576627	881.457	891	1		1	1	0.55319	1	1	1	0	1	1	0	0	0	0	1	0	0	0	1	1	0	0	0	0	0	0	1					0
76576627	738.553		1	1		0	0.55319	1	1	1	0																								0
76576627	1134.46	1275	1		1	0	0.55319	1	1	1	0	0	0	0	0	0	0	0	0	0	0	0	0	0	0	0	0	0	0	0					0
53423826	1452.98		1	0	0	1	0.33	0	0	1																									0
53423826	1811.55	1812	1	1		1	0.2766	1	0	1	0	1	1	1	0	0	0	0	0	0	0	1	1	0	0	0	0	0	0	1	0	0	0	0	0
53423826		2185	1		1	1	0.38298	1	0	1	0	1	1	1	0	0	0	0	0	0	0	1	1	0	0	0	0	0	0	1	1	1	1	1
41256666	400.529	400	1	0	0	1	0.53191	1		0		0	0	0	0	0	0	0	0	0	0	0	0	0	0	1	0	1	0	0	0	0	0	0	0
41256666	861.586	756	1	1		1	0.53191	1		0	0	1	0	0	0	0	0	0	0	0	0	1	1	0	0	0	0	0	0	0	0	0	0	0	0
41256666	1132.39	1132	1		1	1	0.5	1		0	0	1	0	0	0	0	0	0	0	0	0	1	1	0	0	0	0	0	0	0	0	0	0	0	0
41256666	783.544	783	1	0	0	0	0.37	0	0	1		0	0	0	0	0	0	0	0	0	0	0	0	0	0	0	0	0	0	0	0	0	0	0	0
64255431	128.381	131	1		1	0	0.55319	1			1	0	0	0	0	0	0	0	0	0	0	0	0	0	0	0	0	0	0	0	0	0	0	0	0
64255431	1143.58		1	0	0	0	0.63	1	0	1																									0
25381218	508.437	441	1		1	1	0.60638	0			0	1	1	1	1	0	0	0	0	0	0	0	0	0	0	0	0	0	0	1					0
25381218	1314.56	1317	1	0	0	0	0.34	0	0	0		1	0	0	0	0	0	0	0	0	0	1	1	0	0	0	0	0	0	0	1	1	0	0	0
25381218	1780.61	1885	1	1		0	0.45745	0	0	0	0	1	1	1	0	0	0	0	0	0	0	1	1	0	0	0	0	0	0	1					0
25381218	2318.44	2081	1		1	0	0.45745	0	0	0	0	0	0	0	0	0	0	0	0	0	0	0	0	0	0	0	0	0	0	0					0
25381218			1		1		0.45745				0	1	1	0	1	0	0	0	0	0	0	0	0	0	0	0	0	0	0	0
25381218	314.454	77	1		1	0	0.45745	1			1	0	0	0	0	0	0	0	0	0	0	0	0	0	0	0	0	0	0	0					0
25381218			1		1						0	1	1	0	1	0	0	0	0	0	0	1	1	0	0	0	0	0	0	1
25381218	1091.59	1052	1	1		0	0.40426	1			0	1	1	1	0	0	0	0	0	0	0	1	1	0	0	0	0	0	0	1	0	0	0	0	0
32771763	1458.6		1	0	0	1	0.42	0	1	1																									0
32771763		436	1	1		1	0.52128	0	1	1	0	0	0	0	0	0	0	0	0	0	0	0	0	0	0	0	0	0	0	0	0	0	0	0
32771763	827.573	826	1		1	1	0.48936	0	1	1	0	1	0	0	0	0	0	0	0	0	0	1	1	0	0	1	1	0	0	1					0
37346586	1216.41	1219	0	0	0	1	0.43	1	0	1		1	1	1	0	0	0	0	0	0	0	1	1	0	0	0	0	0	0	1	1	1	0	0	0
37346586	140.619	138	0		1	1	0.52128	1			1	1	0	0	0	0	0	0	0	0	0	1	1	0	0	0	0	0	0	0	0	0	0	0	1
37346586	190.314		0	1		0	0.25532	0			1																								0
33868116	505.562	505	1	0	0	0	0.36	1	0	1		0	0	0	0	0	0	0	0	0	0	0	0	0	0	0	0	0	0	0					1
33868116	930.256	931	1	1		0	0.39362	1	0	1	0	1	1	1	0	0	0	0	0	0	0	1	1	0	0	0	0	0	0	1	1	1	0	0	0
33868116		1272	1		1	0	0.46809	1	0	1	0	1	1	1	0	0	0	0	0	0	0	1	1	0	0	0	0	0	0	1
33868116	372.568	372	1	0	0	1	0.36	1	0	1		0	0	0	0	0	0	0	0	0	0	0	0	0	0	1	0	0	1	0					1
33868116	901.58	901	1	0	0	0	0.63	0	0	1		1	1	1	1	0	0	0	0	0	0	1	1	0	0	0	0	0	0	1					0
33868116	1326.27	1326	1	1		0	0.52128	0	0	1	0	1	1	1	0	0	0	0	0	0	0	0	0	0	0	0	0	0	0	0	1	1	0	0	0
33868116	1721.4	1669	1		1	0	0.52128	0	0	1	0	1	1	1	1	0	0	0	0	0	0	1	1	0	0	0	0	0	0	1					1
33868116	253.279	253	1	1		0	0.52128	0	0	1	1	1	1	1	0	0	0	0	0	0	0	0	0	0	0	1	1	0	0	1	0	0	0	0	0
33868116	648.399	595	1		1	0	0.52128	0	0	1	1	1	1	0	1	0	0	0	1	0	0	0	0	0	0	1	1	0	0	1					0
33868116	601.612	604	1	0	0	0	0.43	1	0	1		1	0	0	0	0	0	0	0	0	0	1	1	0	0	0	0	0	0	0					0
28215466			1		1		0.48936				0	1	1	0	1	0	0	0	0	0	0	1	1	0	0	0	0	0	0	1	1	1	0	0
46436752	891.543	887	1	0	0	1	0.4	0	1	1		1	0	0	0	0	0	0	0	0	0	1	1	0	0	0	0	0	0	0					0
46436752	1256.51	1255	1	1		1	0.3617	0	1	1	0	1	1	1	0	0	0	0	0	0	0	1	1	0	1	0	0	0	0	1					1
46436752	1621.39	1620	1		1	1	0.3617	1	1	1	0	1	1	1	0	0	0	0	0	0	0	1	1	0	1	0	0	0	0	1	1	1	0	0	0
46436752	891.546	890	1	0	0	0	0.4	0	1	1		1	1	0	1	0	0	0	0	0	0	1	1	0	0	0	0	0	0	1	0	0	0	0	0
46436752	1256.52	1255	1	1		0	0.3617	0	1	1	0	1	0	0	0	0	0	0	0	0	0	1	1	0	1	0	0	0	0	1					0
46436752	1621.4	1620	1		1	0	0.3617	1	1	1	0	1	1	0	1	0	0	0	0	0	0	1	1	0	0	0	0	0	0	1	0	0	0	0	1
46436752	332.382	331	1		1	1	0.3617	1	1	1	1	1	1	1	0	0	0	0	0	0	0	1	1	0	0	0	0	0	0	1	0	0	0	0	1
46436752	567.482		1	0	0	0	0.48	1	0	1																									0
46436752	931.356	930	1	1		0	0.47872	1	0	1	0	1	1	1	0	0	0	0	0	0	0	1	1	0	0	0	0	0	0	1	1	1	0	0	1
46436752	1297.37	1296	1		1	0	0.47872	1	0	1	0	1	1	1	1	0	0	0	0	0	0	1	1	0	0	0	0	0	0	1	0	0	0	0	1
46436752	346.378	345	1		1	0	0.47872	1	0	1	1	1	0	0	0	0	0	0	0	0	0	1	1	0	0	0	0	0	0	0	0	0	0	0	0
46436752	973.635	973	1	0	0	0	0.35	0	0	1		1	1	1	0	0	0	0	0	0	0	1	1	0	0	0	0	0	0	1	1	1	0	0	0
46436752			1		1		0.43617				0	1	1	1	0	0	0	0	0	0	0	1	1	0	0	0	0	0	0	1
46436752	1352.44	1352	1	1		0	0.43617	1			0	1	0	0	0	0	0	0	0	0	0	1	1	0	0	0	0	0	0	0					0
46436752	1942.37	1855	1	1		0		0			0	1	1	1	1	0	0	0	0	0	0	1	1	0	0	0	0	0	0	1	0	0	0	0	0
46436752	437.375	344	1	1		1		0			0	1	1	1	0	1	0	0	0	0	0	0	0	0	0	0	0	0	0	1					0
76658345	220.508	218	1	1		1	0.48936	0			1	1	1	1	0	0	0	0	0	0	0	1	1	0	0	0	0	0	0	1					0
76658345	1856.52	1856	1	1		0	0.48936	0			0	1	1	1	0	0	0	0	0	0	0	1	1	0	0	0	0	0	0	1	1	1	0	0	0
76658345			1		1		0.60638				0	1	0	0	0	0	0	0	0	0	0	1	1	0	0	0	0	0	0	0
76658345	154.587	153	1		1	1	0.60638	0			1	0	0	0	0	0	0	0	0	0	0	0	0	0	0	0	0	0	0	0					0
53356712	1417.7		1	0	0	1	0.45	1	0	1																									0
53356712			1	1		0	0.42553				0	1	1	1	1	0	0	0	0	0	0	0	0	0	0	0	0	0	0	1	0	0	0	0
53356712	244.52	241	1		1	0	0.42553	1			1	0	0	0	0	0	0	0	0	0	0	0	0	0	0	1	1	0	0	0					0
71426812	309.519	309	1	0	0	0	0.3	1	1	0		0	0	0	0	0	0	0	0	0	0	0	0	0	0	1	1	0	0	0					0
71426812	726.435	726	1	1		0	0.39362	1	1	0	0	1	1	1	0	0	0	0	0	0	0	1	1	0	0	0	0	0	0	1	1	0	1	0	0
71426812			1		1						0	0	0	0	0	0	0	0	0	0	0	0	0	0	0	0	0	0	0	0
32636857	416.999	415	1	0	0	1	0.34	0	0	1		0	0	0	0	0	0	0	0	0	0	0	0	0	0	0	0	0	0	0					0
32636857	892.586	891	1	1		1	0.19149	0	0	1	0	1	1	0	0	0	1	0	0	0	0	0	0	0	0	0	0	0	0	0	1	0	1	0	0
32636857	576.008	575	1	0	0	1	0.48	1	0	1		0	0	0	0	0	0	0	0	0	0	0	0	0	0	1	0	1	1	1	0	0	0	0	0
32636857	1010.46	1050	1	1		1	0.60638	1	0	1	0	0	0	0	0	0	0	0	0	0	0	0	0	0	0	0	0	0	0	0	0	0	0	0	0
32636857	1419.47	1559	1		1	1	0.45745	1	0	1	0																								0
32636857	217.016	215	1	0	0	1	0.34	1	0	1		0	0	0	0	0	0	0	0	0	0	0	0	0	0	0	0	0	0	0	0	0	0	0	0
32636857	651.476	650	1	1		1	0.45745	1	0	1	0	1	1	0	0	0	0	1	0	0	0	0	0	0	0	0	0	0	0	0	0	0	0	0	0
32636857		1062	1		1	1	0.38298	1	0	1	0	0	0	0	0	0	0	0	0	0	0	0	0	0	0	0	0	0	0	0	0	0	0	0
32636857	192.022	191	1	0	0	1	0.4	0	0	1		0	0	0	0	0	0	0	0	0	0	0	0	0	0	0	0	0	0	0	0	0	0	0	0
32636857	635.549	625	1	1		1	0.23404	1	0	1	0	1	1	0	1	0	0	0	0	0	0	0	0	0	0	0	0	0	0	0	0	0	0	0	0
32636857	1035.47	1039	1		1	1	0.32979	0	0	1	0	1	1	0	1	0	0	0	0	0	0	0	0	0	0	0	0	0	0	0	0	0	0	0	0
32636857		1018	1		1	1	0.32979	1	0	1	0	1	1	1	1	0	0	0	0	0	0	1	1	0	0	0	0	0	0	1
32636857			1		1						0	1	1	0	1	0	0	0	0	0	0	0	0	0	0	0	0	0	0	0
38783147			1		1		0.52128				0	1	1	1	0	0	0	0	0	0	0	1	1	0	0	0	0	0	0	1
38783147		344	1	0	0	0	0.43	1	1	1		0	0	0	0	0	0	0	0	0	0	0	0	0	0	1	0	0	1	0	0	0	0	0
38783147	783.628	928	1	1		0	0.43	1	1	1	0	1	1	1	1	0	0	0	0	0	0	1	1	0	0	0	0	0	0	1					0
38783147	344.524		1	0	0	0	0.43	0	1	1																									1
38783147	957.305	781	1	1		0	0.43	1	1	1	0	1	1	1	0	0	0	0	0	0	0	1	1	0	0	1	1	0	0	1	1	1	1	1	0
38783147	1194.53	1194	1	0	0	0	0.43	0	1	1		1	1	1	0	0	0	0	0	0	0	1	1	0	0	1	0	0	1	1					0
38783147	1807.31	1631	1	1		0	0.43	0	1	1	0	1	1	1	1	0	0	0	0	0	0	1	1	0	0	1	1	0	0	1	1	1	1	1	0
38783147	859.48	854	1		1	0	0.39362	0	1	1	0	1	1	0	1	0	0	0	0	0	0	1	1	0	0	0	0	0	0	1	0	0	0	0	0
38783147	357.542		1	0	0	1	0.45	1	1	1																									0
38783147	784.622		1	1		1	0.39362	1	1	1	0																								0
38783147	1195.58	1194	1		1	1	0.41489	0	1	1	0	1	0	0	0	0	0	0	0	0	0	1	1	0	0	0	0	0	0	0	0	0	0	0	0
63748221	641.491	641	1	1		0	0.3617	1			0	1	1	1	1	0	0	0	0	0	0	1	1	0	0	0	0	0	0	1	0	0	0	0	0
63748221	1037.47	1032	1		1	0	0.3617	0			0	1	1	1	0	0	0	0	0	0	0	1	1	0	1	1	1	0	0	1	1	1	0	0	0
63748221	911.5	911	1	1		1	0.3617	1			0	1	1	1	1	1	0	0	0	0	0	1	1	0	0	0	0	0	0	1	1	0	1	0	0
63748221	1307.48	1423	1		1	1	0.3617	0			0	1	0	0	0	0	0	0	0	0	0	1	1	0	0	0	0	0	0	0					0
63748221	1576.51	1576	1	1		0	0.3617	1			0	1	1	1	0	0	0	0	0	0	0	1	1	0	0	0	0	0	0	1	1	1	1	1	0
63748221	1972.49	1936	1		1	0	0.3617	0			0	1	1	1	0	0	0	0	0	0	0	0	0	0	0	1	1	0	0	1					0
63748221	1042.5	1039	1		1	0	0.48936	1			0	1	1	1	0	0	0	0	0	0	0	1	1	0	0	0	0	0	0	1	0	0	0	0	0
57717644	523.372	522	1	0	0	0	0.3	1	0	1		1	1	1	0	0	0	0	0	0	0	0	0	0	0	0	0	0	0	0	0	0	0	0	0
57717644	824.38	823	1	0	0	0	0.3	1	0	1		1	1	1	0	0	0	0	0	0	0	1	1	0	0	0	0	0	0	1	1	1	0	0	0
57717644	1282.45	1200	1	1		0	0.39362	1	0	1	0	1	1	1	0	0	0	0	0	0	0	1	1	0	0	0	0	0	0	1					0
57717644	1554.55		1		1	0	0.39362	0	0	1	0	1	1	1	0	0	0	0	0	0	0	1	1	0	0	0	0	0	0	1	1	1	0	0	0
88327723	1186.44	1185	1	0	0	1	0.28	0	1	1		1	1	1	0	0	0	0	0	0	0	1	1	0	0	1	1	0	0	1	1	1	1	1	0
88327723	1644.48	1563	1	1		1	0.3617	0	1	1	0	1	1	1	0	0	0	0	0	0	0	1	1	0	0	0	0	0	0	1	1	1	1	1	0
88327723		1980	1		1	1	0.39362	0	1	1	0	1	1	1	0	0	0	0	0	0	0	1	1	0	0	0	0	0	0	1
24758351	78.4119		1	0	0	1	0.41	1	1	1																									0
24758351	436.587	436	1	1		1	0.39362	1	1	1	0	1	1	0	1	1	0	0	0	0	0	1	1	0	0	0	0	0	0	1	1	1	0	0	0
24758351	264.417	263	1	0	0	1	0.41	1	1	1		0	0	0	0	0	0	0	0	0	0	0	0	0	0	0	0	0	0	0	0	0	0	0	0
24758351	622.594	622	1	1		1	0.39362	1	1	1	0	1	0	0	0	0	0	0	0	0	0	1	1	0	0	1	0	1	0	1	0	0	0	0	0
24758351	997.519	1057	1		1	1	0.46809	1	1	1	0	1	1	1	1	0	0	0	0	0	0	1	1	0	0	0	0	0	0	1					0
24487612	93.6311	94	1	0	0	0	0.53	0	0	1		0	0	0	0	0	0	0	0	0	0	0	0	0	0	0	0	0	0	0	0	0	0	0	0
24487612	588.589	579	1	1		0	0.5	0			0	1	1	1	0	0	0	0	0	0	0	1	1	0	0	0	0	0	0	1					0
24487612	867.384		1	1		1	0.38298	1			0																								0
24487612	1470.39		1	1		0	0.38298	0			0																								0
48543411	1171.64	1171	1	0	0	0	0.58	1	0	1		1	1	1	0	0	0	0	0	0	0	1	1	0	0	1	1	0	0	1	1	1	0	0	0
48543411	1623.59	1552	1	1		0	0.41489	1	0	1	0	1	1	1	0	0	0	0	0	0	0	1	1	0	0	0	0	0	0	1					0
48543411	229.595		1	1		0	0.41489	1	0	1	1																								0
48543411	513.52	513	1		1	0	0.55319	1	0	1	1	1	0	0	0	0	0	0	0	0	0	1	1	0	0	0	0	0	0	0	0	0	0	0	0
13446417	716.386		1	0	0	0	0.35	0	0	1																									0
13446417	1484.54	1483	1		1	0	0.39362	0	0	1	0	1	0	0	0	0	0	0	0	0	0	1	1	0	0	0	0	0	0	0	1	0	1	0	0
13446417	949.378	948	1	0	0	1	0.35	0	0	1		1	1	0	1	0	0	0	0	0	0	1	1	0	0	0	0	0	0	1	1	0	1	0	0
13446417			1		1		0.39362		0	1	0	1	0	0	0	0	0	0	0	0	0	1	1	0	0	0	0	0	0	0	0	0	0	0
13446417	238.347		1	1		1	0.60638	0			1																								0
13446417	1114.55		1		1	1		0			0																								0
66445717	657.555	657	0	0	0	0	0.33	0	0	1		1	0	0	0	0	0	0	0	0	0	1	1	0	0	1	1	0	0	1	0	0	0	0	1
66445717	236.588		0	0	0	1	0.46	0	0	1																									0
66445717	1315.48	1315	0	1		1	0.23404	0			0	1	1	1	1	0	0	0	0	0	0	1	1	0	0	0	0	0	0	1	1	1	1	1	0
66445717	770.569	771	0	0	0	1	0.52	0	0	1		1	1	0	0	1	0	0	0	0	0	1	1	0	0	1	1	0	0	1	0	0	0	0	1
38861786	932.632	932	1	0	0	1	0.58	1	0	1		1	1	1	0	0	0	0	0	0	0	1	1	0	0	1	0	1	0	1	1	1	0	0	0
38861786	1365.35	1364	1	1		1	0.44681	0	0	1	0	1	1	1	0	0	0	0	0	0	0	1	1	0	0	0	0	0	0	1	0	0	0	0	0
38861786		1787	1		1	1	0.55319	0	0	1	0	1	1	1	1	0	0	0	0	0	0	0	0	0	0	0	0	0	0	1	0	0	0	0
38861786	1256.64	1263	1	0	0	0	0.58	1	0	1		1	1	1	0	0	0	0	0	0	0	0	0	0	0	1	1	0	0	1	1	0	1	0	0
38861786	1689.35	1688	1	1		0	0.44681	0	0	1	0	1	1	1	0	0	0	0	0	0	0	1	1	0	0	0	0	0	0	1	1	1	1	1	0
38861786		2102	1		1	0	0.55319	0	0	1	0	1	1	1	0	0	0	0	0	0	0	1	1	0	0	0	0	0	0	1	1	1	0	0
38861786			1		1		0.39362				0	1	1	0	0	0	1	0	0	0	0	1	1	0	0	0	0	0	0	1	1	1	0	0
17641477	546.586	546	1	0	0	0	0.31	0	0	1		1	1	0	1	0	0	0	0	0	0	1	1	0	0	0	0	0	0	1	1	1	1	1	0
17641477		1000	1	1		0	0.39362	0	0	1	0	1	1	1	0	1	0	0	0	0	0	1	1	0	0	0	0	0	0	1	1	1	1	1
17641477	1392.34	1397	1		1	0	0.39362	0	0	1	0	1	1	1	1	0	0	0	0	0	0	1	1	0	0	0	0	0	0	1	1	1	0	0	1
17641477	695.59		1	0	0	1	0.31	0	0	1																									1
17641477	1541.34	1553	1		1	1	0.39362	0	0	1	0	1	1	0	1	0	0	0	0	0	0	1	1	0	0	0	0	0	0	1	1	1	0	0	0
17641477	766.342	766	1		1	0	0.39362	0	0	1	0	1	1	1	1	0	0	0	0	0	0	1	1	0	0	0	0	0	0	1	1	1	0	0	1
17641477	857.601	857	1	0	0	0	0.28	0	0	1		1	1	1	0	0	0	1	0	0	0	1	1	0	0	0	0	0	0	1	1	1	0	0	1
17641477		1437	1	1		0	0.39362	0	0	1	0	1	1	0	1	0	0	0	0	0	0	1	1	0	0	0	0	0	0	1
17641477	1702.36	1701	1		1	0	0.46809	0	0	1	0	1	1	1	0	0	0	0	0	0	0	1	1	0	0	0	0	0	0	1	0	0	0	0	0
17641477	806.627	806	1	0	0	1	0.37	0	0	1		1	1	0	0	1	0	0	0	0	0	1	1	0	0	0	0	0	0	1	1	1	1	1	0
17641477	1256.34	1260	1	1		1	0.39362	0	0	1	0	1	1	1	0	1	0	0	0	0	0	1	1	0	0	0	0	0	0	1	1	1	0	0	0
17641477	1651.37	1650	1		1	1	0.39362	0	0	1	0	1	1	1	0	1	0	0	0	0	0	1	1	0	0	1	1	0	0	1	1	1	0	0	0
42224732	1064.45		1	0	0	1	0.5	0	1	0																									0
42224732	1492.39	1497	1	1		1	0.34043	1	1	0	0	1	1	1	0	0	0	0	0	0	0	1	1	0	0	0	0	0	0	1	1	1	1	1	0
42224732	1898.38	1894	1		1	1	0.41489	0	1	0	0	1	1	1	0	0	0	0	0	0	0	1	1	0	0	0	0	0	0	1	1	1	0	0	0
42224732	1071.46		1	0	0	1	0.5	0	1	0																									0
42224732	1499.41	1504	1	1		1	0.34043	1	1	0	0	1	1	1	1	0	0	1	0	0	0	1	1	0	0	1	1	0	0	1	1	1	1	1	0
42224732	1905.38	1903	1		1	1	0.41489	0	1	0	0	1	1	1	1	0	0	0	0	0	0	1	1	0	0	0	0	0	0	1	1	1	0	0	0
42224732	2129.39	2125	1		1	1	0.38298	0			0	1	0	0	0	0	0	0	0	0	0	1	0	0	1	0	0	0	0	0	0	0	0	0	0
42224732	1723.42	1728	1	1		1	0.32979	1			0	0	0	0	0	0	0	0	0	0	0	0	0	0	0	0	0	0	0	0	1	1	0	0	0
42224732	1174.5		1	0	0	0	0.53	1	1	0																									0
26261155		291	1	1		0	0.28723	0			0	0	0	0	0	0	0	0	0	0	0	0	0	0	0	0	0	0	0	0	1	0	1	0
26261155	677.57	676	1		1	0	0.41489	0			0	1	0	0	0	0	0	0	0	0	0	1	1	0	0	0	0	0	0	0	0	0	0	0	0
26261155	1651.42	1577	1	1		1	0.28723	0			0	1	1	1	1	0	0	0	0	0	0	1	1	0	0	0	0	0	0	1	1	1	1	1	0
26261155	1962.58	1961	1		1	1	0.41489	0			0	1	1	1	0	0	0	0	0	0	0	1	1	0	0	0	0	0	0	1	1	1	0	0	0
26261155	177.587	176	1		1	1	0.3617	1			1	0	0	0	0	0	0	0	0	0	0	0	0	0	0	0	0	0	0	0	0	0	0	0	0
51811685			1		1		0.39362				0	1	1	1	1	0	0	0	0	0	0	1	1	0	0	0	0	0	0	1
51811685	66.5826	66	1	0	0	0	0.43	0	1	1		0	0	0	0	0	0	0	0	0	0	0	0	0	0	0	0	0	0	0	0	0	0	0	0
51811685	426.597	430	1	0	0	0	0.55	0	1	1		1	0	0	0	0	0	0	0	0	0	1	1	0	0	0	0	0	0	0	1	0	1	0	1
51811685	684.614	689	1	0	0	1	0.47	0	1	1		1	1	1	1	0	0	0	1	0	0	1	1	0	0	0	0	0	0	1	1	1	1	1	0
51811685	363.43	363	1	0	0	1		0				1	1	0	0	1	0	0	0	0	0	0	0	0	0	0	0	0	0	0	0	0	0	0	0
51811685	633.63	637	1	0	0	1	0.56	0	1	1		1	1	1	1	0	0	0	0	0	0	0	0	0	0	0	0	0	0	1	1	1	0	0	0
41316315	1244.66	1244	1	0	0	0	0.43	1	1	1		1	1	1	0	0	0	0	0	0	0	1	1	0	0	0	0	0	0	1	1	1	0	0	1
41316315	1657.48	1646	1	1		0	0.46809	1	1	1	0	1	1	1	0	0	0	0	0	0	0	0	0	0	0	0	0	0	0	0	1	1	0	0	0
14722554	215.494	216	1	0	0	0	0.41	1	0	1		0	0	0	0	0	0	0	0	0	0	0	0	0	0	0	0	0	0	0	0	0	0	0	0
21238478	517.62	533	1	0	0	0	0.47	1	0	1		1	1	0	1	0	1	0	0	0	0	1	1	0	0	1	1	0	0	1	1	1	1	1	0
21238478	919.554	915	1	1		0	0.40426	1	0	1	0	1	1	1	1	0	0	0	0	0	0	1	1	0	0	0	0	0	0	1	1	1	1	1	0
21238478	1319.43	1317	1		1	0	0.39362	0	0	1	0	1	1	1	0	0	0	0	0	0	0	0	0	0	0	0	0	0	0	0					0
21238478	1667.63	1667	1	0	0	0	0.42	1	0	1		1	1	1	0	0	0	0	0	0	0	1	1	0	0	0	0	0	0	1	1	1	1	1	0
21238478	2066.51	2095	1	1		0	0.46809	1	0	1	0	0	0	0	0	0	0	0	0	0	0	0	0	0	0	0	0	0	0	0					0
21238478		2549	1		1	0	0.47872	1	0	1	0	1	1	1	0	0	0	0	0	0	0	1	1	0	0	0	0	0	0	1
83368532	775.479	775	1	0	0	1	0.38	1	0	1		1	1	0	1	0	0	0	0	0	0	1	1	0	0	0	0	0	0	1	1	0	1	0	0
83368532	1217.31	1300	1	1		1	0.39362	1	0	1	0	1	0	0	0	0	0	0	0	0	0	1	1	0	0	0	0	0	0	0	0	0	0	0	0
83368532	1665.41	1634	1		1	1	0.46809	1	0	1	0	1	1	1	1	0	0	0	0	0	0	0	0	0	0	0	0	0	0	1	1	1	0	0	0
83368532	1140.41	1242	1		1	1	0.46809	1	0	1	1	1	1	0	0	1	0	0	0	0	0	1	1	0	0	0	0	0	0	1					0
53416683	718.532	718	1	0	0	1	0.52	1	0	1		1	1	1	0	0	0	0	0	0	0	1	1	0	0	0	0	0	0	1					1
53416683		1258	1	1		1	0.52	1	0	1	0	1	1	1	1	0	0	0	0	0	0	1	1	0	0	1	1	0	0	1
53416683		1559	1		1	1	0.3617	1	0	1	0	1	1	1	0	0	0	0	0	0	0	1	1	0	0	0	0	0	0	1	1	1	0	0
53416683	1112.54	1113	1	0	0	0	0.52	1	0	1		1	1	1	1	0	0	0	0	0	0	0	0	0	0	0	0	0	0	1	1	1	1	1	0
53416683	997.544	998	1	0	0	0	0.63	1	0	1		1	1	1	1	0	0	0	0	0	0	1	1	0	0	0	0	0	0	1	1	1	1	1	0
53416683	1460.49	1460	1	1		0	0.60638	0	0	1	0	1	1	1	0	0	0	0	0	0	0	1	1	0	0	0	0	0	0	1	1	1	1	1	0
53416683		1973	1		1	0	0.60638	0	0	1	0	1	1	1	0	0	0	0	0	0	0	1	1	0	0	0	0	0	0	1
53416683	567.549	567	1	0	0	0	0.55	1	0	1		1	1	1	0	0	0	0	0	0	0	0	0	0	0	0	0	0	0	0	0	0	0	0	0
83786263	126.376	125	1	1		1	0.37234	1			1	0	0	0	0	0	0	0	0	0	0	0	0	0	0	0	0	0	0	0	0	0	0	0	1
83786263		632	1		1	1	0.37234	1			1	1	1	0	1	0	0	0	0	0	0	1	0	1	0	0	0	0	0	1
83786263	973.516	974	1	0	0	0	0.37	0	0	1		1	1	1	0	0	0	0	0	0	0	1	1	0	0	0	0	0	0	1	1	1	1	1	0
56885343	696.564	693	1	1		0	0.31915	0			0	1	1	0	1	0	0	0	0	0	0	1	1	0	0	0	0	0	0	1	0	0	0	0	0
13656132	922.472		1	0	0	0	0.58	1	1	1																									0
13656132	937.846	906	1	1		1	0.71277	1			1	1	1	1	1	0	0	0	0	0	0	1	1	0	0	0	0	0	0	1	1	1	1	1	0
13656132	1323.36	1385	1		1	1	0.71277	1			1	1	1	1	0	0	0	0	0	0	0	1	1	0	0	0	0	0	0	1					0
42684673	110.534	110	1	1		1	0.053191	0			1	0	0	0	0	0	0	0	0	0	0	0	0	0	0	0	0	0	0	0	0	0	0	0	0
42684673	507.474	501	1		1	1	0.19149	0			1	0	0	0	0	0	0	0	0	0	0	0	0	0	0	1	1	0	0	0	0	0	0	0	0
61268738	217.462	217	1	1		1	0.2234	0			1	1	1	0	0	0	1	0	0	0	0	0	0	0	0	0	0	0	0	0	0	0	0	0	0
61268738	644.364	655	1		1	1	0.29787	0			1	1	1	0	0	1	0	0	0	0	0	0	0	0	0	0	0	0	0	0					0
11821782	514.365	513	1	1		1	0.52128	1			1	1	1	1	0	0	0	0	0	0	0	1	1	0	0	0	0	0	0	1	1	0	1	0	0
11821782	307.688	307	1	0	0	1	0.52	1	0	1		0	0	0	0	0	0	0	0	0	0	0	0	0	0	0	0	0	0	0	0	0	0	0	0
11821782	809.383	809	1	1		1	0.48936	1	0	1	0	1	1	1	1	0	0	0	0	0	0	1	1	0	0	0	0	0	0	1	0	0	0	0	0
11821782	1199.34	1288	1		1	1	0.39362	0	0	1	0	1	1	1	0	0	0	0	0	0	0	0	0	0	0	0	0	0	0	0					0
11821782	90.3863	172	1		1	0	0.39362	0	0	1	1	0	0	0	0	0	0	0	0	0	0	0	0	0	0	0	0	0	0	0					0
11821782	448.698	448	1	0	0	1	0.39	0	0	1		1	0	0	0	0	0	0	0	0	0	1	1	0	0	0	0	0	0	0	0	0	0	0	0
11821782	123.706	128	1	0	0	0	0.45	0	0	1		0	0	0	0	0	0	0	0	0	0	0	0	0	0	1	1	0	0	0	0	0	0	0	0
11821782		680	1	1		0	0.45	0	0	1	0	1	1	1	0	0	0	0	0	0	0	1	1	0	0	0	0	0	0	1
11821782	1015.32	1124	1		1	0	0.38298	0	0	1	0	1	1	1	0	0	0	0	1	0	0	1	1	0	0	0	0	0	0	1					0
11821782	97.3395	93	1		1	0	0.38298	0	0	1	1	1	1	0	1	0	0	0	0	0	0	0	0	0	0	0	0	0	0	0	0	0	0	0	0
37677628	762.643	762	1	0	0	0	0.33	0	1	1		1	1	0	1	0	0	0	0	0	0	1	1	0	0	1	1	0	0	1	0	0	0	0	1
37677628	274.568	196	1		1	0	0.21277	0			1	0	0	0	0	0	0	0	0	0	0	0	0	0	0	0	0	0	0	0	0	0	0	0	0
37677628	1101.57	1023	1		1	1	0.5	0			0	1	0	0	0	0	0	0	0	0	0	1	1	0	0	0	0	0	0	0	0	0	0	0	0
25545882	897.455	897	1	0	0	1	0.48	1	0	1		1	1	1	0	0	0	0	0	0	0	1	1	0	0	0	0	0	0	1	1	1	0	0	0
25545882	1352.38	1352	1	1		1	0.39362	1	0	1	0	1	1	1	1	0	0	0	0	0	0	1	1	0	0	0	0	0	0	1	1	1	1	1	0
25545882			1		1	1	0.39362	1	0	1	0	1	1	1	0	0	0	0	0	0	0	0	0	0	0	0	0	0	0	0
25545882	1371.47	1371	1	0	0	1	0.56	0	0	1		1	0	0	0	0	0	0	0	0	0	1	1	0	0	0	0	0	0	0	0	0	0	0	0
25545882	1826.42	1828	1	1		1	0.44681	1	0	1	0	1	1	1	0	0	0	0	0	0	0	1	1	0	0	0	0	0	0	1	0	0	0	0	0
25545882	2206.37	2208	1		1	1	0.44681	0	0	1	0	1	1	1	1	0	0	0	0	0	0	1	1	0	0	0	0	0	0	1	1	0	1	0	0
25545882	209.373	211	1		1	0	0.44681	0	0	1	1	0	0	0	0	0	0	0	0	0	0	0	0	0	0	0	0	0	0	0	0	0	0	0	0
25545882	592.444	592	1	0	0	0	0.45	0	0	1		0	0	0	0	0	0	0	0	0	0	0	0	0	0	0	0	0	0	0	0	0	0	0	0
25545882	1047.4	1047	1	1		0	0.3617	0	0	1	0	1	0	0	0	0	0	0	0	0	0	1	1	0	0	0	0	0	0	0	1	0	1	0	0
25545882		1562	1		1	0	0.3617	0	0	1	0	1	1	1	0	0	0	0	0	0	0	1	1	0	0	1	1	0	0	1
73583638	417.841	348	1	1		1	0.45745	1			1	1	1	0	0	1	0	0	0	0	0	0	0	0	0	0	0	0	0	0	1	1	1	1	1
73583638	740.619	848	1		1	1	0.39362	1			1	1	1	1	1	0	0	0	0	0	0	0	0	0	0	0	0	0	0	1					0
73583638	306.499	306	1	0	0	0	0.4	1	0	1		1	1	0	1	0	1	0	0	0	0	0	0	0	0	0	0	0	0	1	0	0	0	0	0
73583638	1300.47	1302	1	0	0	1	0.5	0	0	1		1	0	0	0	0	0	0	0	0	0	1	1	0	0	0	0	0	0	0					0
73583638	1300.48	1300	1	0	0	1	0.5	0	0	1		1	1	1	0	0	0	0	0	0	0	1	1	0	0	0	0	0	0	1	1	1	1	1	0
73583638	822.491	825	1	0	0	0	0.58	0	0	1		0	0	0	0	0	0	0	0	0	0	0	0	0	0	0	0	0	0	0	0	0	0	0	0
45877134			1		1		0.41489				0	0	0	0	0	0	0	0	0	0	0	0	0	0	0	0	0	0	0	0
36553222	999.449	882	1	0	0	1	0.49	1	0	1		1	1	1	0	0	0	0	0	0	0	1	1	0	0	0	0	0	0	1	1	0	1	0	0
36553222	1349.41	1352	1	1		1	0.41489	0	0	1	0	1	1	1	1	0	0	0	0	0	0	0	0	0	0	0	0	0	0	1	1	0	1	0	0
36553222	1725.4	1723	1		1	1	0.41489	0	0	1	0	1	1	1	0	0	0	0	0	0	0	1	1	0	0	0	0	0	0	1	1	1	1	1	0
36553222	525.402	524	1	1		1	0.41489	0	0	1	1	1	1	1	1	0	0	0	0	0	0	0	0	0	0	0	0	0	0	1	0	0	0	0	0
36553222	905.489	899	1		1	1	0.41489	0	0	1	1	1	0	0	0	0	0	0	0	0	0	1	1	0	0	0	0	0	0	0	0	0	0	0	0
36553222	303.395	313	1	1		1	0.41489	0	0	1	1	0	0	0	0	0	0	0	0	0	0	0	0	0	0	0	0	0	0	0	0	0	0	0	1
36553222		679	1		1	1	0.41489	0	0	1	1	1	1	0	1	0	0	0	0	0	0	1	1	0	0	0	0	0	0	1	0	0	0	0
53316458	516.645	520	1	0	0	1	0.24	0	0	1		1	1	1	0	0	0	0	0	0	0	0	0	0	0	0	0	0	0	0	1	1	1	1	0
53316458		990	1	1		1	0.30851	0	0	1	0	1	1	0	1	0	0	0	0	0	0	1	1	0	0	0	0	0	0	1	0	0	0	0
53316458	1381.5	1382	1		1	1	0.37234	0	0	1	0	1	1	1	1	0	0	0	0	0	0	1	1	0	0	0	0	0	0	1	0	0	0	0	0
68587225			1	0	0		0.41		0	1		1	1	1	1	0	0	0	0	0	0	1	1	0	0	0	0	0	0	1	1	1	0	0
56238828	401.399	400	1	0	0	0	0.39	1	0	1		1	1	0	1	0	0	0	0	0	0	1	1	0	0	0	0	0	0	1					0
56238828	872.32	867	1	1		0	0.29787	1	0	1	0																								0
56238828	275.374	274	1	0	0	0	0.33	0	0	1		1	1	0	1	0	0	0	0	0	0	1	0	1	0	0	0	0	0	1	0	0	0	0	0
56238828	746.345	741	1	1		0	0.39362	1	0	1	0	1	1	1	1	0	0	0	0	0	0	1	1	0	0	0	0	0	0	1	1	1	1	1	0
56238828	1220.51		1		1	0	0.41489	0	0	1	0																								1
56238828	587.366	586	1	0	0	0	0.32	0	0	1		1	1	1	0	0	0	0	0	0	0	1	1	0	0	0	0	0	0	1	0	0	0	0	0
56238828	1058.35	1053	1	1		0	0.26596	0	0	1	0	1	1	1	0	1	0	0	0	0	0	1	1	0	0	0	0	0	0	1	0	0	0	0	0
28851522	1516.51		1	0	0	1	0.64	1	0	1																									0
28851522			1		1		0.39362		0	1	0	1	1	0	1	0	0	0	0	0	0	1	1	0	0	0	0	0	0	1
28851522			1	0	0	1	0.46	0	0	1																									0
84317766	72.4192		1	0	0	1	0.43	1	0	1																									0
84317766	487.619	486	1	1		1	0.37234	1	0	1	0	1	1	0	1	0	0	0	0	0	0	0	0	0	0	0	0	0	0	0	0	0	0	0	0
84317766	408.422	409	1	0	0	1	0.43	1	0	1		0	0	0	0	0	0	0	0	0	0	0	0	0	0	1	1	0	0	0	0	0	0	0	1
84317766	138.333	135	1	1		1	0.37234	1	0	1	1	1	1	0	1	0	0	0	0	0	0	0	0	0	0	1	1	0	0	1					0
84317766	504.538		1		1	1	0.55319	0	0	1	1	1	1	0	1	0	0	0	0	0	0	0	0	0	0	0	0	0	0	0	0	0	0	0	0
84317766	780.524	785	1	0	0	0	0.43	0	0	1		1	1	1	1	0	0	0	0	0	0	1	1	0	0	0	0	0	0	1	1	1	0	0	0
84317766	1329.55	1199	1	1		0	0.28723	0	0	1	0	1	1	1	0	1	0	0	0	0	0	1	1	0	0	0	0	0	0	1	1	1	0	0	0
84317766	1590.34	1719	1		1	0	0.41489	0	0	1	0	1	1	1	0	0	0	0	0	0	0	0	0	0	0	0	0	0	0	0					0
28838334	184.564	186	1	0	0	1	0.28	0	0	0		1	1	0	0	0	1	0	0	0	0	0	0	0	0	1	1	0	0	1	0	0	0	0	0
28838334	597.544	598	1	1		1	0.21277	0	0	0	0	1	1	1	0	0	0	0	0	0	0	1	1	0	0	0	0	0	0	1	1	1	1	1	1
28838334	955.57	955	1	0	0	0	0.28	0	0	0		0	0	0	0	0	0	0	0	0	0	0	0	0	0	0	0	0	0	0	1	1	1	1	0
28838334	1368.55	1369	1	1		0	0.21277	0	0	0	0	1	1	1	0	0	0	0	0	0	0	1	1	0	0	0	0	0	0	1	1	1	0	0	0
28838334	287.373	286	1	1		1	0.25532	0			0	1	1	1	1	1	0	0	0	0	0	1	0	1	0	0	0	0	0	1	0	0	0	0	1
28838334	1770.38	1776	1	1		1	0.25532	0			0	1	1	1	1	1	0	0	0	0	0	0	0	0	0	0	0	0	0	1	0	0	0	0	0
27688558	895.62	896	1	0	0	1	0.4	1	0	1		1	1	1	0	0	0	0	0	0	0	1	1	0	0	0	0	0	0	1	1	1	1	1	0
27688558	379.411	379	1	1		0	0.31915	0	0	1	1	1	1	0	1	0	0	0	0	0	0	0	0	0	0	0	0	0	0	0	0	0	0	0	1
27688558	717.342	715	1		1	0	0.41489	1	0	1	1	1	0	0	0	0	0	0	0	0	0	1	1	0	0	0	0	0	0	0	0	0	0	0	0
44772672	1780.39	1781	1		1	0	0.53191	0			0	1	1	1	0	0	0	0	0	0	0	1	1	0	0	0	0	0	0	1	1	1	1	1	0
44772672	1442.58	1441	1	1		0	0.45745	0			0	1	1	1	1	0	0	0	0	0	0	1	1	0	0	0	0	0	0	1	1	0	1	0	0
11674181	161.566	161	1	0	0	1	0.47	1	0	1		1	1	0	1	0	0	0	0	0	0	0	0	0	0	0	0	0	0	0	0	0	0	0	0
11674181	588.55	587	1	1		1	0.39362	1	0	1	0	1	1	1	0	0	0	0	0	0	0	0	0	0	0	0	0	0	0	0	0	0	0	0	0
11674181	930.479		1		1	1	0.41489	1	0	1	0																								0
11674181	678.568	678	1	0	0	1	0.47	1	0	1		1	0	0	0	0	0	0	0	0	0	1	1	1	0	0	0	0	0	1	0	0	0	0	0
11674181		1210	1	1		1	0.39362	1	0	1	0	1	1	1	0	0	0	0	0	0	0	1	1	0	0	0	0	0	0	1
11674181	1447.48		1		1	1	0.41489	1	0	1	0																								0
45875471	239.483		1	0	0	1	0.36	1	1	1																									0
45875471	702.396	707	1	1		1	0.28723	0	1	1	0	1	1	1	0	0	0	0	0	0	0	0	0	0	0	0	0	0	0	0	1	1	1	1	1
45875471			1	1		1	0.28723		1	1	0	0	0	0	0	0	0	0	0	0	0	0	0	0	0	0	0	0	0	0	0	0	0	0
45875471	449.49	449	1	0	0	1	0.38	1	1	1		1	1	0	1	0	0	0	0	0	0	0	0	0	0	0	0	0	0	0	1	1	0	0	0
45875471	912.374	911	1	1		1	0.30851	1	1	1	0	1	1	1	1	1	0	0	0	0	0	0	0	0	0	0	0	0	0	1	1	0	1	0	0
44581335	201.315	236	1		1	0		1			1	0	0	0	0	0	0	0	0	0	0	0	0	0	0	1	1	0	0	0					0
38617242	634.428	635	1	0	0	1	0.4	0	0	1		0	0	0	0	0	0	0	0	0	0	0	0	0	0	0	0	0	0	0	1	1	0	0	0
38617242	1061.52		1	1		1	0.3617	0	0	1	0																								0
38617242	200.526		1	1		0	0.3617	0	0	1	1																								0
38365111	58.5579		1	0	0	0	0.56	0	1	1																									0
38365111	513.512	517	1	1		0	0.5	0	1	1	0	1	0	0	0	0	0	0	0	0	0	1	1	0	0	0	0	0	0	0	0	0	0	0	1
38365111	894.595	877	1		1	0	0.57447	0	1	1	0	0	0	0	0	0	0	0	0	0	0	0	0	0	0	0	0	0	0	0	0	0	0	0	0
52315524	1129.55	1128	1	1		0	0.45745	0			0	1	0	0	0	0	0	0	0	0	0	1	1	0	0	0	0	0	0	0	1	0	1	0	0
85674257	285.541	286	1	0	0	1	0.32	1	0	1		0	0	0	0	0	0	0	0	0	0	0	0	0	0	0	0	0	0	0	0	0	0	0	0
85674257	729.389	729	1	1		1	0.20213	1	0	1	0	1	1	1	1	0	0	0	0	0	0	1	1	0	0	0	0	0	0	1	1	1	1	1	1
85674257	1117.52	1098	1		1	1	0.12766	1	0	1	0	1	1	1	1	0	0	0	0	0	0	1	1	0	0	0	0	0	0	1	1	1	1	1	0
85674257	1056.55	1057	1	0	0	0	0.32	1	0	1		1	1	1	0	0	0	0	0	0	0	0	0	0	0	0	0	0	0	0	1	1	1	1	0
85674257	1500.39	1511	1	1		0	0.20213	1	0	1	0	1	1	1	1	0	0	0	0	0	0	1	1	0	0	0	0	0	0	1	1	1	1	1	0
85674257	1984.42	1869	1		1	0	0.12766	1	0	1	0	1	1	1	0	0	0	0	0	0	0	1	1	0	0	0	0	0	0	1	1	1	0	0	0
85674257	1213.55	1214	1	0	0	0	0.32	1	0	1		1	1	1	0	0	0	0	0	0	0	1	1	0	0	0	0	0	0	1	1	1	0	0	0
85674257	1657.4	1670	1	1		0	0.20213	1	0	1	0	1	1	1	1	0	0	0	0	0	0	1	1	0	0	0	0	0	0	1	1	1	1	1	0
85674257	2045.53	2175	1		1	0	0.12766	1	0	1	0	1	1	1	1	0	0	0	0	0	0	0	0	0	0	0	0	0	0	1					0
85674257	1653.54	1653	1	0	0	0	0.32	1	0	1		1	1	1	0	0	0	0	0	0	0	1	1	0	0	0	0	0	0	1	1	1	1	1	0
85674257	2097.4	2103	1	1		0	0.20213	1	0	1	0	1	1	1	1	0	0	0	0	0	0	0	0	0	0	0	0	0	0	1	0	0	0	0	0
85674257	2485.53	2466	1		1	0	0.12766	0	0	1	0	1	1	1	0	0	0	0	0	0	0	1	1	0	0	0	0	0	0	1	1	1	1	1	0
85674257	493.577	493	1	0	0	0	0.42	0	0	1		1	1	1	0	0	0	0	0	0	0	0	0	0	0	0	0	0	0	0	1	1	1	1	0
85674257	940.46	942	1	1		0	0.34043	1	0	1	0	1	1	1	1	0	0	0	0	0	0	1	1	0	0	0	0	0	0	1	1	1	1	1	0
85674257	341.426	375	1		1	1	0.37234	0	0	1	1	1	1	1	1	0	0	0	0	0	0	1	1	0	0	0	0	0	0	1					0
85674257	1157.43	1191	1		1	0	0.37234	0	0	1	0	1	1	1	1	0	0	0	0	0	0	1	1	0	0	0	0	0	0	1					0
23141562	113.558	114	1	0	0	1	0.4	0	0	0		1	1	1	0	0	0	0	0	0	0	1	1	0	0	0	0	0	0	1	0	0	0	0	0
23141562	1210.56	1210	1	0	0	1	0.4	0	0	0		1	1	1	0	0	0	0	0	0	0	1	1	0	0	0	0	0	0	1	1	1	1	1	1
62741848	441.367	441	1	0	0	1	0.63	1	0	1		1	1	0	1	0	0	0	0	0	0	0	0	0	0	0	0	0	0	0	0	0	0	0	0
62741848	941.372	929	1	1		1	0.60638	1	0	1	0	1	1	1	1	0	0	0	0	0	0	1	1	0	0	0	0	0	0	1	0	0	0	0	0
62741848	1298.4	1298	1		1	1	0.60638	1	0	1	0	1	1	1	0	0	0	0	0	0	0	1	1	0	0	0	0	0	0	1	1	1	0	0	0
62741848	1313.41	1394	1		1	0	0.41489	1	1	1	0	1	1	0	1	0	0	0	0	0	0	1	1	0	0	0	0	0	0	1					0
62741848	956.378	944	1	1		0	0.34043	0	1	1	0	1	1	0	1	0	0	0	0	0	0	1	1	0	0	0	0	0	0	1	0	0	0	0	0
82544473	127.592	128	1	0	0	1	0.56	1	1	1		0	0	0	0	0	0	0	0	0	0	0	0	0	0	0	0	0	0	0					0
82544473	513.316	513	1	1		1	0.48936	1	1	1	0	1	0	0	0	0	0	0	0	0	0	1	1	1	0	0	0	0	0	1	0	0	0	0	1
82544473	909.311	903	1		1	1	0.57447	1	1	1	0	1	1	0	1	0	0	0	0	0	0	1	1	0	0	0	0	0	0	1	0	0	0	0	0
82544473	438.353	438	1	1		0	0.52128	1			1	1	1	0	1	0	0	0	0	0	0	1	1	1	0	0	0	0	0	1	0	0	0	0	1
82544473	806.593	801	1		1	0	0.52128	0			1	1	1	1	0	0	0	0	0	0	0	1	1	0	0	1	1	0	0	1	0	0	0	0	0
74682475	1209.57	1209	1	0	0	1	0.43	1	1	0		1	1	1	0	0	0	0	0	0	0	1	1	0	0	0	0	0	0	1	1	1	1	1	1
74682475	1609.51	1593	1	1		1	0.43	0	1	0	0	1	1	1	0	0	0	0	0	0	0	1	1	0	0	0	0	0	0	1					0
74682475	1937.36	1941	1		1	1	0.31915	1	1	0	0	1	1	1	0	0	0	0	0	0	0	1	1	0	0	0	0	0	0	1	1	1	1	1	0
74682475	409.363	413	1		1	1	0.31915	1	1	0	1	0	0	0	0	0	0	0	0	0	0	0	0	0	0	0	0	0	0	0	0	0	0	0	0
74682475	933.576	938	1	0	0	0	0.4	1	1	1		1	1	1	1	0	0	0	0	0	0	1	1	0	0	0	0	0	0	1	1	1	0	0	0
16855476	88.4673	88	1	0	0	0	0.37	1	1	1		0	0	0	0	0	0	0	0	0	0	0	0	0	0	1	0	0	1	0					0
16855476	591.448	540	1	1		0	0.39362	0	1	1	0	1	1	1	1	0	0	0	0	0	0	0	0	0	0	0	0	0	0	1					0
16855476	817.559	816	1		1	0	0.37234	1	1	1	0	1	1	1	0	0	0	0	0	0	0	1	1	0	0	1	0	1	0	1	1	1	0	0	0
13157561	254.399	256	1	0	0	0	0.36	0	1	1		0	0	0	0	0	0	0	0	0	0	0	0	0	0	0	0	0	0	0	0	0	0	0	0
13157561	650.387	631	1	1		0	0.35106	1	1	1	0	1	0	0	0	0	0	0	0	0	0	1	1	0	0	0	0	0	0	0	1	1	0	0	0
13157561		982	1		1	0	0.39362	1	1	1	0	0	0	0	0	0	0	0	0	0	0	0	0	0	0	0	0	0	0	0	0	0	0	0
13157561	952.401	952	1	0	0	0	0.36	0	1	1		1	1	1	1	0	0	0	0	0	0	1	1	0	0	0	0	0	0	1	1	1	0	0	0
13157561	1348.39	1436	1	1		0	0.35106	1	1	1	0	1	1	1	0	0	0	0	0	0	0	0	0	0	0	0	0	0	0	0					0
13157561		1680	1		1	0	0.39362	1	1	1	0	1	1	1	0	0	0	0	0	0	0	0	0	0	0	0	0	0	0	0	1	1	0	0
23583742	338.595		1	0	0	1	0.5	1	1	1																									0
35683882	309.525	309	1	0	0	0	0.31	0	1	0		1	1	0	0	0	1	0	0	0	0	0	0	0	0	0	0	0	0	0	1	0	1	0	0
35683882	817.485	686	1	1		0	0.26596	0	1	0	0	1	1	0	1	0	0	0	0	0	0	1	1	0	0	0	0	0	0	1	1	0	1	0	0
35683882	1042.56	1041	1		1	0	0.29787	0	1	0	0	1	1	1	1	0	0	0	0	0	0	1	1	0	0	0	0	0	0	1	1	1	0	0	0
35683882	800.53	800	1	0	0	0	0.18	0	1	0		1	1	1	0	0	0	0	0	0	0	1	1	0	0	0	0	0	0	1	0	0	0	0	0
35683882	1308.5	1177	1	1		0	0.23404	0	1	0	0	1	1	1	1	0	0	0	0	0	0	1	1	0	0	0	0	0	0	1	1	1	1	1	0
35683882	1567.33	1704	1		1	0	0.10638	0	1	0	0	1	1	1	1	0	0	0	0	0	0	1	1	0	0	0	0	0	0	1					0
35683882	49.5331	49	1	0	0	1	0.28	0	1	0		1	1	1	0	0	0	0	0	0	0	1	1	0	0	0	0	0	0	1	0	0	0	0	0
35683882		953	1		1	1	0.42553	0	1	0	0	1	1	1	0	0	0	0	0	0	0	0	0	0	0	0	0	0	0	0
35683882	1061.54	1061	1	0	0	1	0.28	0	1	0		1	1	1	0	0	0	0	0	0	0	0	0	0	0	0	0	0	0	0	1	1	0	0	0
35683882	1444.56	1443	1	1		1	0.42553	0	1	0	0	1	1	1	1	0	0	0	0	0	0	1	1	0	0	0	0	0	0	1	0	0	0	0	0
35683882	1791.35		1		1	1	0.42553	0	1	0	0																								0
35683882	745.505	614	1	1		0	0.34043	0			0	1	1	0	1	0	0	0	0	0	0	1	1	0	0	0	0	0	0	1	1	0	1	0	0
35683882	970.563	969	1		1	0	0.29787	0			0	1	1	1	1	0	0	0	0	0	0	1	1	0	0	1	1	0	0	1	1	1	0	0	0
23856823	730.49	730	1	0	0	1	0.42	0	1	0		1	1	1	0	0	0	0	0	0	0	0	0	0	0	0	0	0	0	0					0
23856823	1108.6	1219	1	1		1	0.35106	0	1	0	0	1	1	1	0	0	0	0	0	0	0	1	1	0	0	0	0	0	0	1					0
23856823		1688	1		1	1	0.28723	0	1	0	0	1	1	1	0	0	0	0	0	0	0	0	0	0	0	1	1	0	0	1
13815157	424.544	424	1	0	0	1	0.34	1	0	0		1	1	0	1	0	0	1	0	0	0	1	1	0	0	0	0	0	0	1	0	0	0	0	0
83477732	819.54	825	1	0	0	0	0.51	1	1	0		1	1	1	1	0	0	1	0	0	0	1	1	0	0	0	0	0	0	1	1	1	0	0	0
83477732	1207.49		1	1		0	0.30851	1	1	0	0																								1
83477732	1553.34	1711	1		1	0	0.30851	1	1	0	0	1	1	1	0	1	0	0	0	0	0	1	1	0	0	0	0	0	0	1					0
21737448	139.425	139	1		1	0	0.31915	0			1	1	1	0	1	0	0	0	0	0	0	0	0	0	0	0	0	0	0	0					1
75358484	546.475	546	1	0	0	1	0.31	1	0	0		1	1	1	0	0	0	0	0	0	0	0	0	0	0	0	0	0	0	0	1	1	0	0	0
75358484	1449.49	1475	1	0	0	0	0.51	0	0	0		1	1	0	1	0	0	0	0	0	0	1	1	0	0	0	0	0	0	1					0
75358484	1822.56	1868	1	1		0	0.5	1	0	0	0	1	0	0	0	0	0	0	0	0	0	1	1	0	0	0	0	0	0	0	0	0	0	0	0
75358484	2211.34		1		1	0	0.53191	1	0	0	0																								0
75358484	957.507		1	0	0	1	0.46	1	0	0																									0
75358484	246.567		1	1		1	0.39362	0	0	0	1																								0
58863227	1409.54	1409	1	0	0	0	0.48	1	0	1		1	1	1	0	0	0	0	0	0	0	0	0	0	0	0	0	0	0	0	1	0	1	0	0
58863227	1786.48	1787	1	1		0	0.41489	1	0	1	0	1	1	1	1	0	0	0	0	0	0	1	1	0	0	0	0	0	0	1	1	1	0	0	1
58863227	260.461	260	1	1		1	0.41489	1	0	1	1	1	1	0	1	0	1	0	0	0	0	0	0	0	0	0	0	0	0	1					1
58863227	337.468		1	1		1	0.41489	1	0	1	1																								0
58863227	1342.48	1343	1	1		1	0.41489	1	0	1	0	1	1	1	1	0	0	0	0	0	0	1	1	0	0	0	0	0	0	1	0	0	0	0	1
52564833	1212.62	1218	1	0	0	1	0.39	0	0	1		1	1	1	0	0	0	0	0	0	0	0	0	0	0	0	0	0	0	0	1	1	0	0	0
52564833	538.641		1	0	0	0	0.49	1	0	0																									0
65743656	228.626	247	1	0	0	1	0.25	1	0	0																									0
65743656	656.384	684	1	1		1	0.18085	0	0	0	0	1	1	1	1	0	0	0	0	0	0	1	1	0	0	0	0	0	0	1	1	0	1	0	0
65743656	1075.38	1076	1		1	1	0.21277	0	0	0	0	1	1	1	1	0	0	1	0	0	0	0	0	0	0	0	0	0	0	1	1	1	1	1	0
65743656	992.629	992	1	0	0	0	0.25	1	0	0		1	1	1	1	1	0	0	0	0	0	1	1	0	0	0	0	0	0	1	1	1	0	0	0
65743656	1450.6	1419	1	1		0	0.18085	0	0	0	0	0	0	0	0	0	0	0	0	0	0	0	0	0	0	0	0	0	0	0	1	1	1	1	1
65743656	152.642	152	1	0	0	0	0.37	0	0	0		0	0	0	0	0	0	0	0	0	0	0	0	0	0	0	0	0	0	0					0
65743656	610.586	535	1	1		0	0.46809	1	0	0	0																								1
65743656	927.645		1	0	0	0	0.37	0	0	0																									0
65743656	1385.59	1354	1	1		0	0.46809	0	0	0	0	1	1	1	0	1	0	0	0	0	0	1	1	0	0	0	0	0	0	1	1	1	1	1	0
65743656	1774.38	1775	1		1	0	0.46809	0	0	0	0	1	1	1	0	1	0	0	0	0	0	1	1	0	0	0	0	0	0	1	1	1	1	1	0
65743656			1	1		1	0.46809	0	0	0	0	1	1	1	1	0	0	0	0	0	0	1	1	0	0	1	1	0	0	1					0
65743656			1		1	1	0.46809	0	0	0	0	1	1	1	0	1	0	0	0	0	0	1	1	0	0	0	0	0	0	1
63113684	697.447	696	1	0	0	0	0.4	1	0	1		1	1	1	1	0	0	1	1	0	0	0	0	0	0	0	0	0	0	1	0	0	0	0	0
63113684		1149	1	1		0	0.39362	1	0	1	0	0	0	0	0	0	0	0	0	0	0	0	0	0	0	0	0	0	0	0
63113684	297.602	295	1	1		1	0.39362	0	0	1	1	0	0	0	0	0	0	0	0	0	0	0	0	0	0	1	1	1	0	1	0	0	0	0	0
63113684	670.486	668	1		1	1	0.26596	0	0	1	1	1	0	0	0	0	0	0	0	0	0	1	1	0	0	0	0	0	0	0					1
63113684	331.399	324	1	1		1	0.39362	1	0	1	1	1	1	0	0	0	0	0	1	0	0	1	1	0	0	0	0	0	0	1	0	0	0	0	0
63113684	259.438	258	1	0	0	0	0.49	0	0	1		1	1	1	0	0	0	0	0	0	0	0	0	0	0	0	0	0	0	0	0	0	0	0	0
63113684	665.394	661	1	1		0	0.43617	0	0	1	0	1	1	0	0	0	0	1	0	0	0	0	0	0	0	0	0	0	0	0					0
63113684	1035.47	1033	1		1	0	0.34043	0	0	1	0	1	0	0	0	0	0	0	0	0	0	1	1	0	0	0	0	0	0	0					0
63113684	223.475	222	1		1	0	0.34043	0	0	1	1	1	1	1	0	0	0	0	0	0	0	0	0	0	0	0	0	0	0	0	0	0	0	0	0
63113684			1		1						0	1	1	1	1	1	0	0	0	0	0	1	1	0	0	1	1	0	0	1
33718116	759.624	759	1	0	0	1	0.43	1	1	1		1	0	0	0	0	0	0	0	0	0	1	1	0	0	0	0	0	0	0	0	0	0	0	0
33718116	1130.46	1130	1	1		1	0.39362	0	1	1	0	1	0	0	0	0	0	0	0	0	0	1	1	0	1	0	0	0	0	1	0	0	0	0	0
33718116	1542.55	1643	1		1	1	0.39362	1	1	1	0	1	0	0	0	0	0	0	0	0	0	1	1	0	0	0	0	0	0	0					0
33718116	1350.63	1350	1	0	0	1	0.43	1	1	1		1	0	0	0	0	0	0	0	0	0	1	1	0	0	0	0	0	0	0	0	0	0	0	0
33718116	1721.47	1721	1	1		1	0.39362	0	1	1	0	1	1	1	0	0	0	1	0	0	0	1	1	0	0	0	0	0	0	1	0	0	0	0	0
33718116	2133.56	2129	1		1	1	0.39362	1	1	1	0	1	1	1	0	0	0	0	0	0	0	1	1	0	0	0	0	0	0	1	1	1	0	0	0
33718116			1		1		0.39362		1	1	0	1	1	0	0	0	0	1	0	0	0	0	0	0	0	0	0	0	0	0
62227141	1652.43	1651	1	0	0	1	0.53	1	0	1		1	1	1	1	0	0	0	0	0	0	1	1	0	0	0	0	0	0	1	0	0	0	0	0
62227141	2025.56	2027	1	1		1	0.46809	0	0	1	0	0	0	0	0	0	0	0	0	0	0	0	0	0	0	0	0	0	0	0					0
62227141	2486.41	2515	1		1	1	0.3617	0	0	1	0	1	1	1	1	0	0	0	0	0	0	1	1	0	0	0	0	0	0	1					0
62227141	524.51	533	1		1	0	0.3617	0	0	1	1	0	0	0	0	0	0	0	0	0	0	0	0	0	0	0	0	0	0	0	1	0	1	0	0
77412563	673.446	672	1	0	0	1	0.63	0	1	1		1	1	0	1	0	0	0	0	0	0	0	0	0	0	0	0	0	0	0	0	0	0	0	0
77412563	1047.42	1049	1	1		1	0.45745	0	1	1	0	1	0	0	0	0	0	0	0	0	0	1	1	0	0	0	0	0	0	0					0
47837123	271.464	276	1	0	0	0	0.43	1	1	1		1	1	0	0	0	1	0	0	0	0	0	0	0	0	0	0	0	0	0	0	0	0	0	1
47837123	647.423	647	1	1		0	0.30851	1	1	1	0	1	1	0	0	0	0	0	1	0	0	1	1	0	0	0	0	0	0	1	1	0	1	0	0
47837123		1155	1		1	0	0.30851	1	1	1	0	1	1	1	0	0	0	0	0	0	0	0	0	0	0	0	0	0	0	0
47837123	127.42	126	1	0	0	0	0.48	0	1	1		0	0	0	0	0	0	0	0	0	0	0	0	0	0	0	0	0	0	0					1
47837123	502.447	502	1	1		0	0.35106	0	1	1	0	0	0	0	0	0	0	0	0	0	0	0	0	0	0	0	0	0	0	0	1	0	1	0	0
47837123		1010	1		1	0	0.35106	0	1	1	0	1	1	0	0	1	0	0	0	0	0	1	1	0	0	0	0	0	0	1
47837123	988.424	987	1	0	0	0	0.48	0	1	1		1	1	1	1	0	0	0	0	0	0	0	0	0	0	0	0	0	0	1	0	0	0	0	0
47837123	1363.45	1365	1	1		0	0.35106	0	1	1	0	1	1	1	1	0	0	0	0	0	0	1	1	0	0	0	0	0	0	1					0
47837123		1871	1		1	0	0.35106	0	1	1	0	1	1	1	0	0	0	0	0	0	0	0	0	0	0	0	0	0	0	0
47837123	1383.48	1388	1	0	0	1	0.39	1	1	1		1	1	0	1	0	0	0	0	0	0	0	0	0	0	0	0	0	0	0	1	1	0	0	0
47837123	1759.48	1759	1	1		1	0.38298	0	1	1	0	1	1	1	0	0	0	0	0	0	0	1	1	0	0	0	0	0	0	1	1	1	0	0	0
47837123		2267	1		1	1	0.38298	0	1	1	0	1	1	1	0	0	0	0	0	0	0	1	1	0	0	0	0	0	0	1
47837123	486.43	485	1	0	0	1	0.63	1	1	1		1	1	1	0	1	0	0	0	0	0	0	0	0	0	0	0	0	0	1	0	0	0	0	1
47837123	862.382	861	1	1		1	0.51064	0	1	1	0	1	1	1	0	0	0	0	0	0	0	1	1	0	0	0	0	0	0	1					1
47837123		1369	1		1	1	0.51064	0	1	1	0	1	1	1	1	1	0	0	0	0	0	1	1	0	0	0	0	0	0	1
47837123	1299.38	1295	1	1		0	0.60638	0			0	0	0	0	0	0	0	0	0	0	0	0	0	0	0	0	0	0	0	0					0
87625514	724.543	724	1	0	0	1	0.41	1	0	1		1	1	1	1	0	0	0	0	0	0	1	1	0	0	0	0	0	0	1	1	1	1	1	0
87625514	1112.48		1	1		1	0.39362	0	0	1	0																								0
53457848	555.629		1	0	0	0	0.32	1	1	1																									1
53457848	925.613	924	1	1		0	0.31915	0	1	1	0	1	1	1	0	0	0	1	0	0	0	0	0	0	0	0	0	0	0	1	0	0	0	0	0
53457848		1331	1		1	0	0.34043	0	1	1	0	1	1	1	0	0	0	0	1	0	0	0	0	0	0	0	0	0	0	1	0	0	0	0
53457848			1	1			0.31915		1	1	0	1	1	0	0	1	0	0	0	0	0	1	1	0	0	0	0	0	0	1	0	0	0	0
53457848			1		1		0.34043		1	1	0	1	0	0	0	0	0	0	0	0	0	1	1	0	0	0	0	0	0	0	0	0	0	0
53457848	350.635	351	1	0	0	1	0.43	1	1	1		1	1	0	0	0	1	0	0	0	0	1	1	0	0	0	0	0	0	1	0	0	0	0	0
53457848	720.604	719	1	1		1	0.41489	0	1	1	0	1	1	0	1	0	0	0	0	0	0	1	1	0	0	0	0	0	0	1	1	1	0	0	0
53457848		1126	1		1	1	0.39362	0	1	1	0	0	0	0	0	0	0	0	0	0	0	0	0	0	0	1	1	0	0	0	0	0	0	0
21617251	1073.6	1073	1	0	0	0	0.32	0	0	1		1	1	1	0	0	0	0	0	0	0	0	0	0	0	0	0	0	0	0	0	0	0	0	0
21617251	129.424	129	1	1		1	0.24468	0	0	1	1	1	1	1	1	0	0	0	0	0	0	1	1	1	0	0	0	0	0	1					0
21617251	482.329	482	1		1	1	0.35106	0	0	1	1	1	1	0	1	0	0	0	0	0	0	0	0	0	0	0	0	0	0	0					0
21617251	989.591	989	1	0	0	1	0.4	0	0	1		1	1	1	1	0	0	0	0	0	0	1	1	0	0	0	0	0	0	1	0	0	0	0	0
21617251	1385.31	1373	1	1		1	0.35106	0	0	1	0	1	0	0	0	0	0	0	0	0	0	1	1	0	0	0	0	0	0	0					0
21617251	1736.33	1738	1		1	1	0.38298	0	0	1	0	1	1	1	0	0	0	0	0	0	0	1	1	0	0	0	0	0	0	1	0	0	0	0	0
13672384	516.432	516	1	0	0	1	0.4	1	1	1		0	0	0	0	0	0	0	0	0	0	0	0	0	0	0	0	0	0	0	0	0	0	0	1
13672384	900.499	901	1	1		1	0.3617	1	1	1	0	1	1	1	0	0	0	0	0	0	0	0	0	0	0	0	0	0	0	0					0
13672384	1297.54	1306	1		1	1	0.34043	1	1	1	0	1	1	1	0	0	0	0	0	0	0	0	0	0	0	0	0	0	0	0	0	0	0	0	1
13672384			1		1		0.34043		1	1	0	1	1	0	0	0	1	0	0	0	0	0	0	0	0	0	0	0	0	0	0	0	0	0
13672384	1072.44	1084	1	0	0	0	0.3	0	1	0		1	1	1	1	0	0	0	0	0	0	1	1	0	0	0	0	0	0	1	1	0	1	0	0
13672384		168	1	0	0	1	0.5	1	1	1		1	1	1	1	0	0	0	0	0	0	1	1	0	0	0	0	0	0	1	0	0	0	0
13672384	536.374	533	1	1		1	0.48936	1	1	1	0	1	1	1	0	0	0	0	0	0	0	1	1	0	0	1	1	0	0	1	0	0	0	0	0
13672384	933.394	932	1		1	1	0.42553	1	1	1	0	0	0	0	0	0	0	0	0	0	0	0	0	0	0	0	0	0	0	0	0	0	0	0	0
68582274	105.41		1	0	0	1	0.63	1	1	0																									0
72337633	723.608	723	1	0	0	1	0.41	1	0	0		1	1	1	1	0	0	1	0	0	0	1	1	0	0	0	0	0	0	1	1	1	1	1	0
72337633	1114.37	1115	1	1		1	0.41	0	0	0	0	1	1	1	1	0	0	0	0	0	0	1	1	0	0	0	0	0	0	1	1	1	1	1	0
72337633	1449.49	1448	1		1	1	0.39362	0	0	0	0	1	1	1	1	0	0	0	0	0	0	1	1	0	0	0	0	0	0	1	0	0	0	0	0
72337633	788.613	812	1	0	0	0	0.41	0	0	0		1	1	1	0	0	0	1	0	0	0	1	1	0	0	0	0	0	0	1					0
72337633	1179.36	1180	1	1		0	0.41	0	0	0	0	1	1	1	0	0	0	0	0	0	0	1	1	0	0	1	0	1	1	1					1
72337633	1514.5	1513	1		1	0	0.39362	0	0	0	0	1	1	1	1	0	0	0	0	0	0	1	1	0	0	0	0	0	0	1	1	1	1	1	0
72337633	977.617	1001	1	0	0	1	0.41	1	0	0		1	1	1	0	0	0	0	0	0	0	0	0	0	0	1	1	0	0	1					0
72337633	1368.35	1369	1	1		1	0.41	1	0	0	0	1	1	1	1	0	0	1	0	0	0	1	1	0	0	1	0	1	0	1					0
72337633	1703.51	1702	1		1	1	0.39362	0	0	0	0	1	1	1	1	0	0	0	0	0	0	0	0	0	0	0	0	0	0	1	1	1	0	0	0
72337633	920.524	919	1		1	1	0.39362	0	0	0	0	1	1	1	1	0	0	0	0	0	0	0	0	0	0	0	0	0	0	1					0
38714365	151.389	156	1	1		1	0.32979	0			1	1	1	1	1	0	0	0	0	0	0	0	0	0	0	0	0	0	0	1					0
38714365	389.543	386	1	1		1	0.32979	0			1	1	1	1	1	0	0	0	0	0	0	0	0	0	0	0	0	0	0	1	0	0	0	0	0
38714365	530.558	527	1	1		1	0.35106	0			1	1	1	1	1	0	0	0	0	0	0	0	0	0	0	0	0	0	0	1	1	0	1	0	0
38714365			1		1	1	0.38298	0			1	1	1	1	1	0	0	0	0	0	0	1	1	0	0	1	1	0	0	1	0	0	0	0
38714365			1		1		0.38298				0	1	1	0	1	1	0	0	0	0	0	0	0	0	0	0	0	0	0	1	0	0	0	0
51718775	1124.38	1123	1	1		0	0.44681	1			0	0	0	0	0	0	0	0	0	0	0	0	0	0	0	0	0	0	0	0					0
51718775	1480.46	1476	1		1	0	0.41489	0			0	1	1	0	1	0	0	0	1	0	0	0	0	0	0	0	0	0	0	1	0	0	0	0	0
51718775	230.483	230	1	0	0	0	0.5	1	0	1		0	0	0	0	0	0	0	0	0	0	0	0	0	0	0	0	0	0	0	0	0	0	0	0
51718775	613.352	612	1	1		0	0.46809	1	0	1	0	1	0	0	0	0	0	0	0	0	0	1	1	0	0	0	0	0	0	0					0
51718775	1256.49		1	0	0	1	0.5	1	0	1																									0
51718775	1639.36		1	1		1	0.46809	1	0	1	0																								0
86211741	117.571	117	1	0	0	1	0.34	0	0	1		0	0	0	0	0	0	0	0	0	0	0	0	0	0	0	0	0	0	0	0	0	0	0	0
86211741	507.479	501	1	1		1	0.52128	0	0	1	0	1	1	1	1	0	0	0	0	0	0	1	1	0	0	0	0	0	0	1	1	0	1	0	0
86211741	381.584	381	1	0	0	1	0.38	0	0	1		1	1	1	0	0	0	0	0	0	0	1	1	0	0	0	0	0	0	1	0	0	0	0	0
86211741	771.491	765	1	1		1	0.39362	0	0	1	0	1	1	1	1	0	0	0	0	0	0	1	1	0	0	0	0	0	0	1	1	1	0	0	0
86211741	1130.34	1116	1		1	1	0.39362	1	0	1	0	1	1	1	0	0	0	0	0	0	0	1	1	0	0	1	0	1	0	1	1	1	0	0	0
86211741	574.611	574	1	0	0	0	0.38	1	0	1																									0
86211741	964.503	958	1	1		0	0.39362	0	0	1	0	1	1	1	1	0	0	0	0	0	0	1	1	0	0	0	0	0	0	1	1	0	1	0	0
86211741	1323.34	1310	1		1	0	0.39362	1	0	1	0	1	1	0	0	0	0	0	1	0	0	1	1	0	0	0	0	0	0	1	0	0	0	0	0
86211741	782.591	782	1	0	0	1	0.38	1	0	1		1	1	1	0	0	0	1	0	0	0	1	1	0	0	0	0	0	0	1	1	1	0	0	1
86211741	1531.34	1518	1		1	1	0.39362	1	0	1	0	1	1	1	0	0	0	0	0	0	0	1	1	0	0	1	0	1	0	1	1	1	0	0	0
86211741	975.588	976	1	0	0	0	0.38	1	0	1		1	1	1	0	0	0	0	0	0	0	1	1	0	0	0	0	0	0	1	1	1	0	0	0
65176636	192.371	192	1	1		1	0.52128	1			1	0	0	0	0	0	0	0	0	0	0	0	0	0	0	0	0	0	0	0					0
65176636		549	1		1	1	0.45745	1			1	1	0	0	0	0	0	0	0	0	0	1	1	0	0	0	0	0	0	0	0	0	0	0
65176636	1206.46	1206	1	0	0	0	0.5	0	0	0		1	1	1	0	0	0	0	0	0	0	1	1	0	0	0	0	0	0	1	1	1	0	0	0
65176636	1584.38	1583	1	1		0	0.43617	0	0	0	0	1	1	1	0	0	0	0	0	0	0	1	1	0	0	0	0	0	0	1					1
65176636			1		1						0	1	1	1	1	0	0	0	0	0	0	1	1	0	0	0	0	0	0	1
52128546	70.7027	71	1	0	0	1	0.71	1	0	1		0	0	0	0	0	0	0	0	0	0	0	0	0	0	0	0	0	0	0	0	0	0	0	0
52128546	448.481	450	1	1		1	0.53191	1	0	1	0	1	0	0	0	0	0	0	0	0	0	1	1	0	0	1	1	0	0	1					1
52128546		955	1		1	1	0.39362	1	0	1	0	1	1	1	0	0	0	0	0	0	0	1	1	0	0	0	0	0	0	1
11146635	1028.48	1032	1	0	0	0	0.46	0	0	1		1	1	0	0	1	0	0	0	0	0	0	0	0	0	0	0	0	0	0	1	1	0	0	0
11146635		1398	1	1		0	0.46	0	0	1	0	1	1	0	1	1	0	0	0	0	0	0	0	0	0	0	0	0	0	1
11146635	1756.38	1756	1		1	0	0.60638	1	0	1	0	1	1	1	1	0	0	0	1	0	0	1	1	0	0	0	0	0	0	1	1	1	0	0	0
11146635	237.388	236	1	1		1	0.41489	1			1	1	1	1	0	0	0	0	0	0	0	1	1	0	0	0	0	0	0	1					0
11146635	595.379	594	1		1	1	0.53191	1			1	1	1	0	1	0	0	0	0	0	0	1	1	0	0	0	0	0	0	1	0	0	0	0	0
48456666			1		1		0.43		1	1	0	1	1	1	1	0	0	0	0	0	0	0	0	0	0	0	0	0	0	1
34446154	570.45	569	1	0	0	0	0.44681	0				1	1	1	0	0	0	0	0	0	0	1	1	0	0	0	0	0	0	1	0	0	0	0	0
14845885	177.544	183	1	0	0	0	0.58	0	1	1		0	0	0	0	0	0	0	0	0	0	0	0	0	0	0	0	0	0	0	0	0	0	0	0
14845885	545.49	545	1	1		0	0.48936	1	1	1	0	0	0	0	0	0	0	0	0	0	0	0	0	0	0	0	0	0	0	0	0	0	0	0	0
14845885		904	1		1	0	0.48936	1	1	1	0	1	1	1	0	0	0	0	0	0	0	0	0	0	0	0	0	0	0	0	0	0	0	0
83127512	230.398	229	1	0	0	0	0.63	1	0	1		0	0	0	0	0	0	0	0	0	0	0	0	0	0	0	0	0	0	0	1	1	1	1	0
83127512	606.486	604	1	1		0	0.38298	1	0	1	0	1	0	0	0	0	0	0	0	0	0	1	1	0	0	0	0	0	0	0					0
83127512	975.466	970	1		1	0	0.38298	1	0	1	0	1	1	1	1	0	0	0	0	0	0	1	1	0	0	1	1	0	0	1	0	0	0	0	1
83127512	107.411	111	1	0	0	1	0.43	1	0	1		0	0	0	0	0	0	0	0	0	0	0	0	0	0	0	0	0	0	0	0	0	0	0	0
83127512	483.498	481	1	1		1	0.46809	1	0	1	0	1	0	0	0	0	0	0	0	0	0	1	1	0	0	0	0	0	0	0					0
83127512	852.472	847	1		1	1	0.55319	0	0	1	0	1	1	0	1	0	0	0	0	0	0	1	1	0	0	0	0	0	0	1	0	0	0	0	1
83127512	332.474	326	1		1	1	0.55319	1	0	1	1	1	1	0	1	0	0	0	0	0	0	1	1	0	0	1	1	0	0	1	1	0	1	0	0
83127512			1		1						0	1	1	1	1	0	0	0	0	0	0	0	0	0	0	0	0	0	0	1	0	0	0	0
54313161	730.444	611	1	1		1	0.31915	1			0	1	1	1	1	0	0	0	0	0	0	1	1	0	0	0	0	0	0	1					0
54313161	975.501	970	1		1	1	0.31915	1			0	1	0	0	0	0	0	0	0	0	0	1	1	0	0	0	0	0	0	0	0	0	0	0	0
54313161	1723.45	1604	1	1		0	0.31915	1			0	1	1	1	1	0	0	0	0	0	0	1	1	0	0	0	0	0	0	1					0
54313161		1975	1		1	0	0.31915	1			0	1	1	0	1	0	0	0	1	0	0	0	0	0	0	0	0	0	0	1	0	0	0	0
57128564	400.574	400	1	0	0	1	0.34	1	1	0		0	0	0	0	0	0	0	0	0	0	0	0	0	0	1	1	0	0	0	1	0	1	0	0
61613887			1		1		0.41489				0	1	0	0	0	0	0	0	0	0	0	1	1	0	0	0	0	0	0	0
18663646	1000.55	997	1	0	0	0	0.46	0	1	0		1	1	1	1	0	0	0	0	0	0	1	1	0	0	0	0	0	0	1	0	0	0	0	0
11778728	1158.51	1158	1	0	0	1	0.59	0	1	1		0	0	0	0	0	0	0	0	0	0	0	0	0	0	0	0	0	0	0	0	0	0	0	0
11778728	177.603		1	1		0	0.45745	0	1	1	1																								0
11778728	557.324	548	1		1	0	0.37234	0	1	1	1	1	1	0	1	0	0	0	0	0	0	0	0	0	0	0	0	0	0	0	0	0	0	0	0
88366471	280.5	281	1		1	1	0.38298	0			1	1	1	0	0	1	0	0	0	0	0	0	0	0	0	0	0	0	0	0	0	0	0	0	0
57811485	777.774	777	1	0	0	1	0.41	0	1	1		1	1	1	1	0	0	0	0	0	0	0	0	0	0	0	0	0	0	1	0	0	0	0	0
57811485	1158.62	1154	1	1		1	0.39362	0	1	1	0	1	1	1	1	0	0	1	0	0	0	1	1	0	0	0	0	0	0	1	1	0	1	0	1
57811485	1431.03	1430	1	0	0	0	0.41	1	1	1		1	1	1	1	0	0	0	0	0	0	1	1	0	0	0	0	0	0	1	0	0	0	0	0
57811485	1811.63	1807	1	1		0	0.39362	0	1	1	0	1	1	1	0	0	0	0	0	0	0	1	1	0	0	0	0	0	0	1	1	1	1	1	0
57811485	2163.41	2157	1		1	0	0.44681	1	1	1	0	1	1	1	0	0	0	0	0	0	0	1	1	0	0	0	0	0	0	1	1	1	1	1	0
64688881	742.534	742	1	0	0	1	0.3	0	0	1		1	1	1	0	0	0	0	0	0	0	0	0	0	0	0	0	0	0	0	0	0	0	0	0
64688881	1119.37	1121	1	1		1	0.24468	0	0	1	0	1	1	1	0	0	0	0	0	0	0	0	0	0	0	0	0	0	0	0	1	1	1	1	0
64688881	1473.48	1611	1		1	1	0.24468	0	0	1	0	0	0	0	0	0	0	0	0	0	0	0	0	0	0	0	0	0	0	0	0	0	0	0	0
58444314	239.556	240	1	0	0	0	0.44	1	0	1		0	0	0	0	0	0	0	0	0	0	0	0	0	0	0	0	0	0	0	0	0	0	0	0
58444314	1034.56		1	0	0	0	0.44	1	0	1																									0
58444314	533.573		1	0	0	1	0.26	0	0	1																									1
58444314	994.576		1	0	0	1	0.26	0	0	1																									0
86116266	997.401		1	0	0	0	0.42	1	1	1																									0
86116266	1363.48		1	1		0	0.41489	1	1	1	0																								0
86116266	269.488	265	1	1		0	0.41489	1	1	1	1	0	0	0	0	0	0	0	0	0	0	0	0	0	0	0	0	0	0	0					0
86116266	622.382	622	1		1	0	0.53191	1	1	1	1	1	1	1	0	0	0	0	0	0	0	1	1	0	0	0	0	0	0	1					1
86116266	80.4039		1		1	1	0.47872	1			1																								0
86116266	666.396	666	1		1	0	0.25532	0			0	1	1	1	1	0	0	0	0	0	0	1	1	0	0	0	0	0	0	1	0	0	0	0	0
86116266	2022.4		1		1	1	0.25532	0			0																								0
34226533			0	1			0.31915				0																				0	0	0	0
34226533			0		1		0.31915				0	1	0	0	0	0	0	0	0	0	0	1	1	0	0	0	0	0	0	0
34226533			0		1		0.31915				0	1	1	1	0	0	0	1	0	0	0	0	0	0	0	0	0	0	0	1	1	1	0	0
34226533	309.706		0	0	0	0	0.47	1	0	1																									0
34226533	802.625		0	0	0	0	0.47	1	0	1																									0
34226533			0		1						0	1	1	1	0	0	0	0	0	0	0	1	1	0	0	0	0	0	0	1
43841811	228.451	227	1	1		0	0.53191	1			1	1	1	0	1	0	0	0	0	0	0	0	0	0	0	0	0	0	0	0					1
43841811	665.447	662	1		1	0	0.60638	0			1	1	0	0	0	0	0	0	0	0	0	1	1	0	0	0	0	0	0	0	0	0	0	0	0
43841811	83.4051	82	1	1		1	0.3617	1			1	1	1	0	1	0	0	0	0	0	0	0	0	0	0	0	0	0	0	0					0
43841811	535.495	534	1		1	1	0.5	0			1	0	0	0	0	0	0	0	0	0	0	0	0	0	0	0	0	0	0	0	0	0	0	0	0
43841811	295.481	294	1	1		1	0.38298	1			1	1	1	0	0	0	1	0	0	0	0	0	0	0	0	0	0	0	0	0					0
43841811	732.436	729	1		1	1	0.38298	0			1	1	1	1	1	0	0	0	0	0	0	1	1	0	0	0	0	0	0	1	0	0	0	0	0
45146463	1067.58		1	0	0	0	0.36	0	1	1																									0
45146463	1554.42	1487	1	1		0	0.31915	0	1	1	0	1	1	1	0	0	0	0	0	0	0	1	1	0	0	0	0	0	0	1	0	0	0	0	0
45146463	1792.45	1944	1		1	0	0.31915	0	1	1	0	1	1	0	0	0	0	1	0	0	0	1	1	0	0	0	0	0	0	1					0
45146463	388.591	387	1		1	0	0.31915	0	1	1	1	1	1	0	1	0	0	0	0	0	0	0	0	0	0	1	1	0	0	1	0	0	0	0	0
58513242	519.506	516	1	0	0	1	0.22	0	0	1		1	1	1	0	0	0	0	0	0	0	0	0	0	0	0	0	0	0	0	1	1	1	1	1
58513242	888.396	939	1	1		1	0.06383	0	0	1	0	1	1	1	1	1	0	0	0	0	0	0	0	0	0	1	0	1	0	1	1	1	0	0	1
58513242	1354.44	1354	1		1	1	0.031915	0	0	1	0	1	1	1	0	1	0	0	0	0	0	1	1	0	0	0	0	0	0	1					0
58513242	1048.51	1045	1	0	0	1	0.22	0	0	1		1	1	1	1	0	0	0	0	0	0	1	1	0	0	0	0	0	0	1	1	1	1	1	0
58513242	1417.4	1468	1	1		1	0.06383	0	0	1	0	1	1	1	0	0	0	0	0	0	0	1	1	0	0	0	0	0	0	1	1	1	1	1	0
58513242	1883.45	1883	1		1	1	0.031915	0	0	1	0	1	0	0	0	0	0	0	0	0	0	1	1	0	0	1	0	1	0	1					0
58513242	1265.51	1262	1	0	0	1	0.31	0	0	1		1	1	1	0	0	0	0	0	0	0	1	1	0	0	1	0	1	0	1	1	1	1	1	0
58513242	1699.57	1692	1	1		1	0.10638	0	0	1	0	1	1	1	0	0	0	0	0	0	0	1	1	0	0	0	0	0	0	1	1	1	1	1	0
58513242	2100.46		1		1	1	0.25532	0	0	1	0																								0
58513242	159.466	167	1	1		0	0.10638	0	0	1	1	0	0	0	0	0	0	0	0	0	0	0	0	0	0	0	0	0	0	0					0
58513242	582.455	606	1		1	0	0.25532	1	0	1	1	1	1	1	0	1	0	0	0	0	0	0	0	0	0	0	0	0	0	1					0
82133122	1341.67		1	0	0	1	0.43	1	1	1																									0
82133122	314.341	310	1		1	0	0.39362	0	1	1	1	1	1	0	1	0	1	1	0	0	0	0	0	0	0	0	0	0	0	1	1	0	1	0	0
82133122	314.426	313	1	0	0	1	0.36	0	1	1		1	1	0	1	1	0	0	0	0	0	1	1	0	0	1	1	0	0	1	0	0	0	0	0
82133122		765	1	1		1	0.30851	0	1	1	0	1	1	0	0	0	0	1	0	0	0	1	1	0	0	0	0	0	0	1
82133122	1169.23	1088	1		1	1	0.25532	0	1	1	0	1	1	1	0	0	0	0	0	0	0	1	1	0	0	0	0	0	0	1					0
82133122	789.429		1	0	0	1	0.36	0	1	1																									0
82133122	1566.37	1670	1		1	1	0.25532	0	1	1	0	1	1	1	1	0	0	0	0	0	0	1	1	0	0	0	0	0	0	1					0
51615317	1030.7	1030	1	0	0	0	0.38	0	0	1		1	1	1	0	0	0	0	0	0	0	1	1	0	0	0	0	0	0	1	0	0	0	0	1
51615317	1474.31	1415	1	1		0	0.3617	0	0	1	0	1	1	1	1	0	0	0	0	0	0	1	1	0	0	0	0	0	0	1					0
51615317	1787.4	1892	1		1	0	0.39362	0	0	1	0	1	1	1	1	0	0	0	0	1	0	1	1	0	0	0	0	0	0	1					0
81433262	763.392	763	1		1	0	0.55319	0			0	1	1	1	0	0	0	0	0	0	0	1	1	0	0	0	0	0	0	1	0	0	0	0	1
38323872	825.513	825	1	0	0	0	0.55	1	1	1		1	0	0	0	0	0	0	0	0	0	1	0	0	1	0	0	0	0	0	1	1	1	1	0
72214617	124.542	121	1	0	0	0	0.43	0	0	1		1	1	0	1	0	0	0	0	0	0	0	0	0	0	0	0	0	0	0					0
72214617	489.464	489	1	1		0	0.38298	0	0	1	0	1	1	0	1	0	0	0	0	0	0	1	1	0	0	0	0	0	0	1	0	0	0	0	1
72214617	888.386	890	1		1	0	0.41489	0	0	1	0	1	1	1	0	0	0	0	0	0	0	1	1	0	0	0	0	0	0	1	0	0	0	0	1
14367882	994.559	996	1	0	0	0	0.3	0	0	1		1	1	1	0	0	0	0	0	0	0	1	1	0	0	0	0	0	0	1	1	0	1	0	0
14367882	360.572	362	1	0	0	0	0.6	1	0	1		0	0	0	0	0	0	0	0	0	0	0	0	0	0	0	0	0	0	0	0	0	0	0	0
14367882	728.457	767	1	1		0	0.57447	0	0	1	0	1	1	0	1	0	0	0	1	0	0	1	1	0	0	1	0	1	0	1	0	0	0	0	1
14367882	722.359	722	1		1	0	0.39362	0			1	1	1	0	1	0	0	0	0	0	0	0	0	0	0	1	1	0	0	1	1	0	1	0	0
26314238	676.561	676	1	0	0	0	0.41	0	0	1		1	0	0	0	0	0	0	0	0	0	1	1	0	0	0	0	0	0	0	1	1	0	0	0
26314238	1045.55	1058	1	1		0	0.39362	1	0	1	0	1	1	0	1	0	0	0	0	0	0	1	1	0	0	0	0	0	0	1					0
26314238	1438.42		1		1	0	0.46809	0	0	1	0																								0
26314238	1020.56	1020	1	0	0	1	0.41	0	0	1		1	1	0	0	0	0	1	0	0	0	0	0	0	0	0	0	0	0	0	0	0	0	0	0
26314238		1468	1	1		1	0.39362	0	0	1	0	1	1	1	0	0	0	0	0	0	0	0	0	0	0	0	0	0	0	0
26314238	1782.43		1		1	1	0.46809	0	0	1	0																								0
26314238	1785.56		1	1		0	0.39362	1	0	1	0																								0
26314238	186.436	183	1		1	0	0.46809	0	0	1	1	0	0	0	0	0	0	0	0	0	0	0	0	0	0	0	0	0	0	0	0	0	0	0	0
81872478	601.548	600	1	0	0	0	0.51	0	1	1		1	0	0	0	0	0	0	0	0	0	1	1	0	0	0	0	0	0	0	0	0	0	0	0
81872478	1033.29	1025	1	1		0	0.34043	0	1	1	0	0	0	0	0	0	0	0	0	0	0	0	0	0	0	1	1	0	0	0	0	0	0	0	0
81872478	1364.37	1364	1		1	0	0.40426	0	1	1	0	1	1	0	0	0	0	1	0	0	0	0	0	0	0	0	0	0	0	0	1	1	1	1	0
81872478			1		1	1	0.40426	0	1	1	1	1	1	0	1	0	0	0	0	0	0	0	0	0	0	1	1	0	0	1	0	0	0	0	0
81872478	1503.55	1502	1	0	0	1	0.44	0	1	1		1	0	0	0	0	0	0	0	0	0	1	1	0	0	1	1	0	0	1	0	0	0	0	0
81872478	1864.39	1861	1	1		1	0.48936	0	1	1	0	1	1	0	1	0	0	0	0	0	0	0	0	0	0	0	0	0	0	0	0	0	0	0	0
81872478	2266.37	2260	1		1	1	0.35106	0	1	1	0	1	1	1	0	0	0	1	0	0	0	1	1	0	0	0	0	0	0	1	0	0	0	0	0
66217333	822.575	822	1	0	0	1	0.75	0	0	0		1	1	0	1	0	0	0	0	0	0	1	1	0	0	0	0	0	0	1	1	1	0	0	1
66217333	1219.46	1220	1	1		1	0.60638	1	0	0	0	0	0	0	0	0	0	0	0	0	0	0	0	0	0	0	0	0	0	0					0
66217333		1302	1		1	0	0.48936	0			0	1	1	1	0	0	0	0	0	0	0	1	1	0	0	1	1	0	0	1	0	0	0	0
66217333	630.559	630	1	0	0	0	0.68	1	0	0		1	1	0	1	0	0	0	0	0	0	1	1	0	0	0	0	0	0	1	0	0	0	0	1
66217333	1049.42	1028	1	1		0	0.48936	0	0	0	0	1	1	0	0	1	0	0	0	0	0	0	0	0	0	0	0	0	0	0	0	0	0	0	0
66217333	40.3924	36	1		1	0	0.64894	0			1	0	0	0	0	0	0	0	0	0	0	0	0	0	0	0	0	0	0	0					1
66217333	802.479	803	1	1		1	0.60638	0			0	1	0	0	0	0	0	0	0	0	0	1	1	0	0	1	1	0	0	1	0	0	0	0	0
66217333	1182.38	1178	1		1	1	0.52128	1			0	1	0	0	0	0	0	0	0	0	0	1	1	0	0	0	0	0	0	0	1	1	0	0	1
66217333	131.384	126	1		1	1	0.52128	1			1	1	0	0	0	0	0	0	0	0	0	1	1	0	0	0	0	0	0	0					0
66217333	148.514	149	1	1		0	0.46809	0			1	0	0	0	0	0	0	0	0	0	0	0	0	0	0	0	0	0	0	0	0	0	0	0	0
66217333	525.404	524	1		1	0	0.48936	0			1	1	1	1	1	0	0	0	0	0	0	1	1	0	0	1	1	0	0	1	0	0	0	0	0
66217333	915.589	916	1	0	0	1	0.73	0	0	0		1	0	0	0	0	0	0	0	0	0	1	1	0	0	0	0	0	0	0	0	0	0	0	0
45415434			1	0	0	1	0.38	0	0	1																									0
45415434	454.487	455	1	0	0	0	0.53	0	0	1		0	0	0	0	0	0	0	0	0	0	0	0	0	0	0	0	0	0	0	0	0	0	0	0
44132567	511.564	515	0	0	0	1	0.42	0	1	1		1	0	0	0	0	0	0	0	0	0	1	1	0	0	0	0	0	0	0	1	0	1	0	0
44132567	921.4	921	0	1		1	0.5	0	1	1	0	1	1	1	1	0	0	0	0	0	0	1	1	0	0	0	0	0	0	1	1	1	1	1	0
44132567	1664.39	1299	0		1	1	0.32979	0	1	1	0	1	1	1	0	0	0	0	0	0	0	1	1	0	0	0	0	0	0	1	1	1	0	0	0
44132567	573.399	342	0		1	0	0.32979	1	1	1	1	1	1	1	0	0	0	0	0	0	0	1	1	0	0	1	1	0	0	1					0
44132567	1006.58	1006	0	0	0	0	0.4	0	1	1		1	1	1	1	0	0	0	0	0	0	1	1	0	0	0	0	0	0	1	1	1	1	1	1
44132567	1416.43	1767	0	1		0	0.35106	0	1	1	0	1	0	0	0	0	0	0	0	0	0	1	1	0	0	0	0	0	0	0					0
44132567	1794.51	1794	0		1	0	0.37234	0	1	1	0	1	1	1	1	0	0	0	0	0	0	1	1	0	0	0	0	0	0	1	1	1	0	0	0
44132567	1365.42	1364	0	0	0	0	0.5	1	0	1		1	1	1	0	0	0	0	0	0	0	1	1	0	0	0	0	0	0	1	1	1	1	1	0
44132567		2126	0	1		0	0.5	1	0	1	0	1	1	1	0	0	0	0	0	0	0	1	1	0	0	0	0	0	0	1
44132567	2152.49	2152	0		1	0	0.48936	0	0	1	0	1	1	1	0	0	0	0	0	0	0	1	1	0	0	0	0	0	0	1	1	1	0	0	0
44132567	558.444	557	0	0	0	1	0.61	0	0	0		1	1	1	0	0	0	0	0	0	0	1	1	0	0	0	0	0	0	1	1	1	1	1	0
44132567	967.422	967	0	1		1	0.52128	0	0	0	0	1	0	0	0	0	0	0	0	0	0	1	1	0	0	0	0	0	0	0	1	1	0	0	0
44132567	1345.48	1345	0		1	1	0.58511	0	0	0	0	1	1	1	1	0	0	0	0	0	0	1	1	0	0	0	0	0	0	1	1	1	0	0	0
44132567	276.529	276	0	0	0	0	0.35	0	1	1		0	0	0	0	0	0	0	0	0	0	0	0	0	0	0	0	0	0	0	0	0	0	0	1
44132567	686.322	686	0	1		0	0.35106	1	1	1	0	1	1	1	1	0	0	1	0	0	0	0	0	0	0	1	1	0	0	1	1	1	1	1	0
44132567	1059.55	1059	0		1	0	0.3617	1	1	1	0	1	1	0	1	0	0	0	0	0	0	1	1	0	0	0	0	0	0	1	0	0	0	0	0
44132567	1667.32		0	1		0	0.35106	1	1	1	0																								0
44132567	2040.56	2040	0		1	0	0.3617	1	1	1	0	1	1	1	0	0	0	0	0	0	0	1	1	0	0	0	0	0	0	1	0	0	0	0	1
51521281	1116.5		0		1	1	0.46809	0		0	0																								0
51521281	728.379	673	0	0	0	0	0.5	1	1	1		1	1	0	0	1	0	0	0	0	0	0	0	0	0	0	0	0	0	0	0	0	0	0	0
51521281	1099.71	1099	0	1		0	0.41489	1	1	1	0	1	0	0	0	0	0	0	0	0	0	1	1	0	0	1	1	0	0	1	0	0	0	0	0
51521281	1855.33	1491	0		1	0	0.46809	1	1	1	0	1	0	0	0	0	0	0	0	0	0	1	1	0	0	0	0	0	0	0	0	0	0	0	0
51521281	1375.38	1320	0	0	0	0	0.5	1	1	1		1	1	1	0	1	0	0	0	0	0	0	0	0	0	0	0	0	0	1	0	0	0	0	0
51521281	1747.38		0	1		0	0.41489	1	1	1	0																								0
51521281	2502.33		0		1	0	0.46809	1	1	1	0																								0
51521281	1421.51	1364	0	0	0	0	0.49	1	1	1		1	1	1	0	1	0	0	0	0	0	1	1	0	0	0	0	0	0	1	0	0	0	0	0
51521281	1791.39	1790	0	1		0	0.45745	1	1	1	0	1	0	0	0	0	0	0	0	0	0	1	1	0	0	0	0	0	0	0	1	0	1	0	0
51521281	2546.34		0		1	0	0.45745	0	1	1	0																								0
51521281			0		1		0.40426				0	1	1	1	0	0	1	0	0	0	0	0	0	0	0	0	0	0	0	1	0	0	0	0
76265472	280.545	193	0	0	0	1	0.39362	0				1	1	0	1	0	0	0	0	0	0	1	1	0	0	0	0	0	0	1	1	1	0	0	0
76265472	621.506	621	0	1		1	0.39362	1			0	1	1	1	0	0	0	0	0	0	0	1	1	0	0	0	0	0	0	1	1	1	1	1	0
76265472	1008.37	1005	0		1	1	0.3617	0			0	1	1	1	0	0	0	0	0	0	0	1	1	1	0	1	0	1	0	1	1	1	0	0	0
76265472	555.554	468	0	0	0	0	0.39362	0				1	1	1	1	0	0	0	0	0	0	1	1	0	0	0	0	0	0	1	1	1	1	1	0
76265472	896.51	896	0	1		0	0.39362	0			0	1	1	1	1	0	0	0	0	0	0	1	1	0	0	0	0	0	0	1	1	1	0	0	0
76265472	1283.38	1281	0		1	0	0.3617	0			0	1	1	1	1	0	0	0	0	0	0	0	0	0	0	0	0	0	0	1	1	1	1	1	0
76265472	986.556	899	0	0	0	0	0.39362	0				1	1	1	1	0	0	0	0	0	0	1	1	0	0	1	1	0	0	1	1	1	0	0	0
76265472	1345.46	1628	0	1		0	0.39362	1			0	1	1	1	0	0	0	0	0	0	0	1	1	0	0	0	0	0	0	1					0
76265472	1714.38	1849	0		1	0	0.3617	0			0	1	1	1	0	0	0	0	0	0	0	0	0	0	0	0	0	0	0	0					0
76265472	375.558	288	0	0	0	1	0.25532	0				1	1	0	1	1	0	0	0	0	0	1	1	0	0	0	0	0	0	1	0	0	0	0	0
47348578			0	0	0	1	0.35		1	1		1	1	1	1	0	0	0	0	0	0	1	1	0	0	0	0	0	0	1	1	1	0	0
47348578	1103.5	1015	0	0	0	0	0.35	0	1	1		1	1	1	1	0	0	1	0	0	0	1	1	0	0	0	0	0	0	1	1	1	0	0	0
47348578	1441.5	1443	0	1		0	0.3617	0	1	1	0	1	1	1	0	0	0	0	0	0	0	1	1	0	0	1	1	0	0	1	1	1	1	1	0
47348578	1848.55	1832	0		1	0	0.32979	0	1	1	0	1	1	1	1	0	0	0	0	0	0	1	1	0	0	1	1	0	0	1	1	1	1	1	0
47348578	839.341	831	0		1	0	0.41489	0			0	1	1	1	1	0	0	0	0	0	0	1	1	0	0	1	1	0	0	1	0	0	0	0	0
47348578			0	0	0		0.5		1	1		1	1	0	0	1	0	0	0	0	0	0	0	0	0	0	0	0	0	0	0	0	0	0
47348578			0	1			0.37234		1	1	0	1	1	1	1	0	0	0	0	0	0	1	1	0	0	0	0	0	0	1
47348578	1276.51	1188	0	0	0	0	0.5	0	1	1																					0	0	0	0	0
47348578	1977.63	1614	0	1		0	0.37234	0	1	1	0	1	1	1	1	0	0	0	0	0	0	1	1	0	0	0	0	0	0	1	1	1	0	0
47348578	625.472	623	0	1		1	0.37234	0	1	1	0	1	1	1	0	1	0	0	0	0	0	1	1	0	0	0	0	0	0	1	0	0	0	0	0
47348578	843.499	841	0	1		0	0.37234	0	1	1	0	1	1	1	1	0	0	0	0	0	0	1	1	0	0	0	0	0	0	1	0	0	0	0	0
36423468	549.586	551	0	0	0	1	0.63	1	1	1		1	1	1	0	0	0	0	0	0	0	1	1	0	0	0	0	0	0	1	0	0	0	0	0
36423468	946.519	947	0	1		1	0.60638	1	1	1	0	1	1	1	1	0	0	0	0	0	0	0	0	0	0	0	0	0	0	1	1	1	0	0	0
15428456			0		1					0	0	1	1	1	0	1	0	0	0	0	0	1	1	0	1	0	0	0	0	1
15428456	1032.47		0	0	0	1	0.47	1	1	1																									0
15428456	1789.53	1469	0	1		1	0.46809	1	1	1	0	1	1	0	0	0	0	0	1	0	0	1	1	0	0	0	0	0	0	1					0
15428456	1818.59	1818	0		1	1	0.46809	1	1	1	0	1	1	1	0	0	0	0	0	0	0	1	1	0	0	0	0	0	0	1	1	1	0	0	0
15428456	1174.45		0	0	0	1	0.43	1	1	1																									0
15428456	1572.44	1571	0	1		1	0.34043	1	1	1	0	1	1	1	0	0	0	0	0	0	0	1	1	0	0	0	0	0	0	1	1	1	1	1	0
15428456		2094	0		1	1	0.34043	1	1	1	0	1	1	1	0	0	0	0	0	0	0	1	1	0	0	0	0	0	0	1
15428456	821.436		0	0	0	1	0.55	0	1	1																									0
15428456	1579.46		0	1		1	0.43617	0	1	1	0																								0
15428456	1616.5	1741	0		1	1	0.43617	1	1	1	0	1	1	1	0	1	0	0	0	0	0	0	0	0	0	0	0	0	0	1					0
15428456	534.619		0	1		0	0.43617	0	1	1	1																								0
15428456	571.505	563	0		1	0	0.43617	1	1	1	1	1	1	1	0	0	0	0	0	0	0	1	1	0	0	0	0	0	0	1	1	1	0	0	0
23487665	173.455	173	0	0	0	1	0.29	0	1	1		1	1	1	0	0	0	0	0	0	0	1	1	0	0	0	0	0	0	1	1	1	1	1	0
23487665	563.39	573	0	1		1	0.41489	0	1	1	0	1	1	1	0	0	0	0	0	0	0	1	1	0	0	0	0	0	0	1	1	1	0	0
23487665	865.461	865	0	0	0	1	0.29	1	1	1		1	0	0	0	0	0	0	0	0	0	1	1	0	0	0	0	0	0	0	1	1	1	1	0
23487665		1554	0	1		1	0.41489	1	1	1	0	1	1	1	1	0	0	0	0	0	0	1	1	0	0	0	0	0	0	1
23487665		1636	0		1	1	0.39362	1	1	1	0	1	0	0	0	0	0	0	0	0	0	1	1	0	0	0	0	0	0	0
23487665	863.467	863	0	0	0	1	0.29	0	1	1		1	1	0	0	0	1	0	0	0	0	0	0	0	0	1	1	0	0	1	0	0	0	0	0
23487665			0		1		0.41489			0	0	1	0	0	0	0	0	0	0	0	0	1	1	0	0	0	0	0	0	0	0	0	0	0
42658584	263.568		0	0	0	0	0.52	0	0	1																									0
42658584	459.33	457	0	1		0	0.46809	0	0	1	0	0	0	0	0	0	0	0	0	0	0	0	0	0	0	1	1	0	0	0	1	1	1	1	0
42658584	1321.57		0	0	0	0	0.52	0	0	1																									0
42658584	1517.34	1515	0	1		0	0.46809	0	0	1	0	1	1	1	1	0	0	0	0	0	0	1	1	0	0	1	1	0	0	1	1	1	1	1	0
42658584	1130.59	1130	0	0	0	0	0.63	1	1	1		0	0	0	0	0	0	0	0	0	0	0	0	0	0	0	0	0	0	0	0	0	0	0	0
42658584	1745.02	1744	0		1	0	0.55319	1	1	1	0	1	1	1	1	0	0	0	0	0	0	1	1	0	0	0	0	0	0	1	1	1	0	0	0
61572288	1038.63	1038	0	0	0	1	0.37	0	1	1		1	0	0	0	0	0	0	0	0	0	1	1	0	0	0	0	0	0	0	1	1	1	1	0
61572288	1517.4	1518	0	1		1	0.34043	1	1	1	0	1	1	0	1	0	0	1	1	0	0	0	0	0	0	0	0	0	0	1	0	0	0	0	0
61572288	1787.41	1786	0		1	1	0.40426	0	1	1	0	0	0	0	0	0	0	0	0	0	0	0	0	0	0	0	0	0	0	0	1	1	1	1	0
34855421	975.355		0	0	0	0	0.63	1	1	1																									0
34855421	690.352	691	0	0	0	0	0.58	1	1	1		0	0	0	0	0	0	0	0	0	0	0	0	0	0	0	0	0	0	0	0	0	0	0	0
34855421	1439.94	1114	0	1		0	0.45745	0	1	1	0	0	0	0	0	0	0	0	0	0	0	0	0	0	0	0	0	0	0	0	1	0	1	0	1
34855421	1463.51		0		1	0	0.43617	0	1	1	0																								0
34855421	565.945	206	0	1		0	0.45745	0	1	1	1	0	0	0	0	0	0	0	0	0	0	0	0	0	0	1	1	0	0	0					0
34855421	589.521	585	0		1	0	0.43617	0	1	1	1	1	1	1	1	0	0	0	0	0	0	1	1	0	0	0	0	0	0	1	0	0	0	0	0
34855421	947.596	581	0		1	0		0			0	1	1	1	0	0	0	0	0	0	0	1	1	0	0	1	0	1	0	1	1	1	0	0	0
34855421	1004.58	1000	0		1	0	0.60638	0			0	1	1	1	1	0	0	0	0	0	0	1	1	0	0	0	0	0	0	1	1	1	0	0	0
58467264			0	1			0.37234			0	0	1	0	0	0	0	0	0	0	0	0	1	1	0	0	0	0	0	0	0	1	0	1	0
58467264	739.434	739	0	0	0	0	0.53	1	1	0		1	1	1	0	0	0	0	0	0	0	0	0	0	0	0	0	0	0	0	1	1	0	0	0
36121833	817.466		0	0	0	1	0.43	1	1	1																									0
36121833	1189.57	1190	0	1		1	0.39362	1	1	1	0	1	1	1	0	0	0	0	0	0	0	1	1	0	0	0	0	0	0	1	1	1	0	0	0
36121833	1562.49	1561	0		1	1	0.39362	0	1	1	0	1	0	0	0	0	0	0	0	0	0	1	1	0	0	0	0	0	0	0	1	1	1	1	0
85258214	1188.4	1186	0	0	0	1	0.6	0	1	1		1	1	0	1	0	0	0	0	0	0	0	0	0	0	0	0	0	0	0	0	0	0	0	0
85258214	1587.53	1631	0	1		1	0.58511	0	1	1	0	1	1	1	0	0	0	0	0	0	0	1	1	0	0	0	0	0	0	1	1	1	1	1	0
85258214		1995	0		1	1	0.52128	0	1	1	0	1	1	1	0	0	0	0	0	0	0	1	1	0	0	0	0	0	0	1	1	1	1	1
85258214	979.451	1022	0	1		1	0.58511	1		0	0	1	1	1	0	0	0	0	0	0	0	1	1	0	0	0	0	0	0	1	1	1	0	0	0
73855752	772.416	771	0	0	0	1	0.4	1	1	1		1	1	1	0	0	0	0	0	0	0	1	1	0	0	1	1	0	0	1	0	0	0	0	0
73855752	453.407	427	0	0	0	1	0.4	1	1	1		1	0	0	0	0	0	0	0	0	0	1	1	0	0	0	0	0	0	0	1	0	1	0	0
21555838	193.419	185	0		1	0	0.41489	1		0	1	0	0	0	0	0	0	0	0	0	0	0	0	0	0	0	0	0	0	0	0	0	0	0	0
21555838	708.378	694	0		1	1	0.41489	1		0	0	1	0	0	0	0	0	0	0	0	0	1	1	0	0	0	0	0	0	0	0	0	0	0	0
56226425	1635		0	0	0	1	0.39	1	1	1																									0
56226425	2035.37		0	1		1	0.32979	0	1	1	0																								0
56226425	95.3091		0	1		1	0.57447	1		0	1																								0
56226425		638	0		1	1	0.58511	1		0	1	1	1	1	0	0	0	0	0	0	0	0	0	0	0	0	0	0	0	0
84328437	660	661	0	0	0	1	0.42	1	1	0		1	1	1	0	0	0	0	0	0	0	1	1	0	0	1	1	0	0	1	1	1	0	0	0
84328437	1061.41	1062	0	1		1	0.41489	1	1	0	0	1	1	1	0	0	0	0	0	0	0	1	1	0	0	0	0	0	0	1	1	1	0	0	0
84328437	465.408	451	0		1	0	0.37234	1	1	0	1	1	1	0	1	0	0	1	1	0	0	0	0	0	0	0	0	0	0	1	0	0	0	0	0
84328437	171	172	0	0	0	0	0.42	0	1	0																					0	0	0	0	0
84328437	572.377	573	0	1		0	0.30851	1	1	0	0	1	1	1	0	0	0	0	0	0	0	1	1	0	0	1	1	0	0	1					1
84328437	932	933	0	0	0	1	0.42	0	1	0		1	1	1	1	0	0	0	0	0	0	1	1	0	0	1	1	0	0	1	1	1	0	0	0
84328437	1333.38	1333	0	1		1	0.30851	1	1	0	0	1	1	1	1	0	0	0	1	0	0	1	1	0	0	0	0	0	0	1	1	1	0	0	0
62216325	103	103	0	0	0	0	0.39	1	0	0		1	1	0	1	0	0	0	0	0	0	0	0	0	0	1	1	0	0	1	0	0	0	0	0
67743124	386.461	317	0	0	0	1	0.33	1	1	1		1	1	0	0	0	1	0	0	0	0	0	0	0	0	1	1	0	0	1	0	0	0	0	0
67743124	718.425	719	0	1		1	0.39362	1	1	1	0	1	1	1	1	0	0	0	0	0	0	1	1	0	0	0	0	0	0	1	1	1	0	0	0
67743124		1118	0		1	1	0.39362	1	1	1	0	1	1	1	0	0	0	1	0	0	0	1	1	0	0	0	0	0	0	1	1	1	1	1
67743124	1294.46	1225	0	0	0	0	0.33	1	1	1		1	1	1	0	0	0	0	0	0	0	0	0	0	0	0	0	0	0	0	1	1	0	0	0
67743124	1626.43		0	1		0	0.39362	1	1	1	0																								0
67743124	2041.58	2027	0		1	0	0.39362	0	1	1	0	1	1	1	0	0	0	0	0	0	0	1	1	0	0	0	0	0	0	1	1	1	0	0	0
67743124	248.332	248	0	1		0	0.39362	1	1	1	1	1	1	0	0	1	0	0	0	0	0	0	0	0	0	0	0	0	0	0					0
67743124		647	0		1	0	0.39362	1	1	1	1	0	0	0	0	0	0	0	0	0	0	0	0	0	0	0	0	0	0	0	1	1	1	1
67743124	626.467	557	0	0	0	0	0.55	0	1	1		0	0	0	0	0	0	0	0	0	0	0	0	0	0	1	1	0	0	0	0	0	0	0	0
67743124	958.419	959	0	1		0	0.52128	0	1	1	0	1	1	1	0	0	0	0	0	0	0	1	1	0	0	0	0	0	0	1	1	1	1	1	0
67743124	1373.56		0		1	0	0.57447	0	1	1	0	1	1	1	0	1	0	0	0	0	0	0	0	0	0	0	0	0	0	1					0
25574127	290.854	289	0		1	1	0.35106	0			1	1	1	1	1	1	0	0	0	0	0	0	0	0	0	0	0	0	0	1					1
25574127			0	1			0.29787				0	0	0	0	0	0	0	0	0	0	0	0	0	0	0	0	0	0	0	0
25574127	205.847	204	0		1	0	0.24468	0			1	1	1	0	1	1	0	0	0	0	0	0	0	0	0	0	0	0	0	1	0	0	0	0	1
25574127	205.851	204	0		1	1	0.24468	0			1	1	1	0	1	1	0	0	0	0	0	0	0	0	0	0	0	0	0	1					1
25574127	870.864	869	0		1	0	0.41489	0			0	1	0	0	0	0	0	0	0	0	0	1	1	0	0	0	0	0	0	0	1	1	0	0	0
25574127			0		1		0.31915				0	1	1	1	0	0	0	0	0	0	0	1	1	0	0	0	0	0	0	1	0	0	0	0
71575662	338.329	339	0		1	0	0.34043	0		0	1	1	1	0	0	0	1	0	0	0	0	0	0	0	0	0	0	0	0	0	0	0	0	0	0
71575662	45.5444	57	0	0	0	0	0.34	1	1	1		0	0	0	0	0	0	0	0	0	0	0	0	0	0	0	0	0	0	0	0	0	0	0	0
87547718	750.594	750	0	0	0	0	0.6	1	1	1		0	0	0	0	0	0	0	0	0	0	0	0	0	0	0	0	0	0	0	1	0	1	0	0
68182278	1542.59	1542	0		1	0	0.41489	1	1	1	0	1	1	0	0	1	0	0	0	0	0	1	1	0	0	0	0	0	0	1	0	0	0	0	0
68182278	1158.35	1159	0	1		0	0.53191	1	1	1	0	0	0	0	0	0	0	0	0	0	0	0	0	0	0	0	0	0	0	0					0
68182278	323.348	323	0	1		0	0.6383	1		0	1	1	1	0	0	0	1	0	0	0	0	0	0	0	0	0	0	0	0	0					0
68182278	706.607	703	0		1	0	0.48936	1		0	1	1	1	0	0	1	0	0	0	0	0	1	1	0	0	0	0	0	0	1					0
31461341	354.421	354	0	0	0	1	0.63	0	1	1																					1	1	0	0	0
31461341	760.957	752	0	1		1	0.3617	1	1	1	0	1	1	1	1	0	0	0	0	0	0	1	1	0	0	0	0	0	0	1	1	1	1	1	0
31461341	1124.41	1125	0		1	1	0.35106	1	1	1	0	1	1	1	1	0	0	0	1	0	0	1	1	0	0	0	0	0	0	1	1	1	0	0	0
31461341	1063.43	1063	0	0	0	0	0.63	0	1	1																									0
31461341	1458.33	1460	0	1		0	0.3617	1	1	1	0	1	1	1	0	0	0	0	0	0	0	1	1	0	0	0	0	0	0	1					0
31461341	1833.41	1853	0		1	0	0.35106	1	1	1	0																								0
31461341	929.679	929	0	0	0	0	0.52	1	1	0		1	1	1	0	0	0	0	0	0	0	1	1	0	0	0	0	0	0	1	1	1	0	0	0
47517541	1170.45		0	0	0	1	0.49	1	1	0																									0
45118715	738	738	0	0	0	1	0.39362	0				1	1	1	1	0	0	0	0	0	0	0	0	0	0	0	0	0	0	1	1	1	1	1	0
45118715	1548.88	1667	0		1	1	0.39362	1			0	1	1	1	0	0	0	0	0	0	0	0	0	0	0	0	0	0	0	0					0
45118715	1228	1228	0	0	0	1	0.39362	1				1	1	1	1	0	0	1	0	0	0	1	1	0	0	0	0	0	0	1	1	1	0	0	0
45118715	1993.98	1630	0	1		1	0.39362	0			0	1	1	1	1	0	0	0	0	0	0	1	1	0	0	0	0	0	0	1	1	1	1	1	0
45118715	2394.42		0		1	1	0.39362	0			0	1	1	1	0	0	0	0	0	0	0	0	0	0	0	0	0	0	0	0
45118715	572.984	210	0	1		0	0.39362	1			1	1	1	0	0	0	1	0	0	0	0	0	0	0	0	0	0	0	0	0	0	0	0	0	0
45118715	617.886	736	0		1	0	0.39362	1			1	1	0	0	0	0	0	0	0	0	0	1	1	0	0	1	1	0	0	1					0
45118715			0	1		1	0.39362				0	1	1	0	1	0	1	0	0	0	0	0	0	0	0	0	0	0	0	1
45118715	838.883	957	0		1	0	0.39362	1			0	1	0	0	0	0	0	0	0	0	0	1	1	0	0	1	1	0	0	1					0
45118715	885	885	0	0	0	0	0.31	0	1	1		1	0	0	0	0	0	0	0	0	0	1	1	0	0	0	0	0	0	0	0	0	0	0	1
45118715	633.395	270	0		1	0	0.37234	1			0	1	1	1	1	0	0	1	0	0	0	0	0	0	0	0	0	0	0	1	0	0	0	0	0
82565766	856.676	855	1	0	0	0	0.43	0	1	1		1	1	1	1	0	0	0	0	0	0	1	1	0	0	0	0	0	0	1	1	1	0	0	0
82565766	1230.44	1441	1	1		0	0.39362	0	1	1	0	1	0	0	0	0	0	0	0	0	0	1	1	0	0	0	0	0	0	0					0
82565766		1669	1		1	0	0.39362	0	1	1	0	1	0	0	0	0	0	0	0	0	0	1	1	0	0	0	0	0	0	0
82565766	271.442	271	1	1		0	0.39362	0	1	1	1	0	0	0	0	0	0	0	0	0	0	0	0	0	0	0	0	0	0	0	0	0	0	0	0
82565766	634.395	631	1		1	0	0.39362	0	1	1	1	1	1	1	0	1	0	0	0	0	0	1	1	1	0	0	0	0	0	1	1	1	0	0	0
82565766	220.292	219	1	1		1	0.39362	0	1	1	1	0	0	0	0	0	0	0	0	0	0	0	0	0	0	0	0	0	0	0					0
82565766	581.438	578	1		1	1	0.39362	0	1	1	1	1	1	0	0	1	0	0	0	0	0	1	1	1	0	1	1	0	0	1	1	0	1	0	0
82565766	168.588	124	1	0	0	0	0.35	1	1	1		1	1	1	0	0	0	0	1	0	0	1	1	0	0	0	0	0	0	1	1	1	0	0	0
82565766	222.483	223	1	1		1	0.053191	0	0	0	1	1	1	0	0	1	0	0	0	0	0	0	0	0	0	0	0	0	0	0	0	0	0	0	0
82565766	585.475	582	1		1	1	0.32979	0	0	0	1	1	0	0	0	0	0	0	0	0	0	1	1	0	0	0	0	0	0	0	1	0	1	0	0
55367657	109.575		0	0	0	0	0.4	1	1	1																									0
55367657	479.501	476	0	1		0	0.40426	0	1	1	0	0	0	0	0	0	0	0	0	0	0	0	0	0	0	0	0	0	0	0	0	0	0	0	0
55367657		918	0		1	0	0.38298	0	1	1	0	1	1	1	0	0	0	0	0	0	0	1	0	1	0	0	0	0	0	1
55367657	1083.57		0	0	0	0	0.4	1	1	1																									0
55367657	1207.59		0	0	0	1	0.53	0	1	1																									0
44723345	317.436	317	0	1		1	0.2766	0		0	1	1	1	0	1	0	0	0	0	0	0	0	0	0	0	1	0	1	0	1	0	0	0	0	1
44723345	701.905	704	0		1	1	0.43617	0		0	1	1	1	1	0	0	0	0	0	0	0	1	1	0	0	0	0	0	0	1	1	1	1	1	1
44723345	602.511	604	0	0	0	1	0.36	0	0	0		1	1	0	1	0	0	0	0	0	0	1	1	0	0	0	0	0	0	1	0	0	0	0	0
44723345		1298	0	1		1	0.36	0	0	0	0	1	1	1	0	0	0	0	0	0	0	0	0	0	0	0	0	0	0	0
44723345		1522	0		1	1	0.36	0	0	0	0	1	1	1	0	0	0	0	0	0	0	1	1	0	0	1	0	0	1	1
44723345	311.523	313	0	0	0	1	0.32	0	0	0		1	1	1	0	0	0	0	0	0	0	1	1	0	0	1	0	1	0	1	1	1	0	0	0
44723345	706.706	705	0	1		1	0.34043	0	0	0	0	1	1	1	1	0	0	0	0	0	0	1	1	0	0	0	0	0	0	1	1	1	1	1	0
44723345	1089.87	1091	0		1	1	0.23404	1	0	0	0	1	1	1	0	0	0	0	0	0	0	1	1	0	0	0	0	0	0	1	1	1	0	0	0
44723345	690.862	323	0	1		1	0.34043	0	0	0	1	1	0	0	0	0	0	0	0	0	0	1	1	1	0	0	0	0	0	1	1	1	0	0	0
44723345	712.908	710	0		1	1	0.23404	0	0	0	1	1	1	1	1	0	0	0	0	0	0	1	1	0	0	0	0	0	0	1	1	1	0	0	0
44723345	1042.53	1044	0	0	0	0	0.49	0	0	0		1	1	1	0	0	0	0	0	0	0	1	1	0	0	0	0	0	0	1	1	1	0	0	0
44723345	1438.3	1439	0	1		0	0.48936	0	0	0	0	1	1	1	1	0	0	0	0	0	0	1	1	0	0	0	0	0	0	1	1	1	0	0	0
44723345	1820.89	1822	0		1	0	0.45745	0	0	0	0	1	1	1	1	0	0	0	0	0	0	1	1	0	0	0	0	0	0	1	1	1	0	0	0
64483672	250.48	250	0	0	0	0	0.36	0	1	0		1	1	0	0	1	0	0	0	0	0	0	0	0	0	0	0	0	0	0	0	0	0	0	0
64483672	180.577	180	0		1	0	0.6383	1	1	0	1	0	0	0	0	0	0	0	0	0	0	0	0	0	0	0	0	0	0	0					0
64483672	60.4979	60	0	0	0	1	0.52	1	1	0		0	0	0	0	0	0	0	0	0	0	0	0	0	0	0	0	0	0	0	0	0	0	0	0
64483672		457	0	1		1	0.3617	1	1	0	0	1	1	1	1	0	0	0	0	0	0	1	1	0	0	0	0	0	0	1
64483672	843.584	844	0		1	1	0.55319	1	1	0	0	1	1	1	1	0	0	0	0	0	0	1	1	0	0	0	0	0	0	1	1	1	0	0	0
64483672	178.388	176	0	0	0	1	0.47	1	1	0		0	0	0	0	0	0	0	0	0	0	0	0	0	0	1	1	0	0	0	0	0	0	0	0
27166526	157.298		0	1		0	0.39362	0		0	1	0	0	0	0	0	0	0	0	0	0	0	0	0	0	0	0	0	0	0					0
27166526	184.381	181	0		1	0	0.39362	1		0	1	1	1	1	0	0	0	0	0	0	0	0	0	0	0	0	0	0	0	0	1	1	0	0	1
27166526	118.362		0	1		0	0.61702	1		0	1																								0
27166526	508.396	505	0		1	0	0.48936	1		0	1	1	0	0	0	0	0	0	0	0	0	1	1	0	0	0	0	0	0	0	0	0	0	0	0
27166526	906.57	905	0	0	0	1	0.63	1	1	1		1	1	1	1	0	0	0	0	0	0	0	0	0	0	0	0	0	0	1	1	1	1	1	0
27166526		1337	0	1		1	0.63	1	1	1	0	1	1	0	1	0	0	0	0	0	0	1	1	0	0	0	0	0	0	1	0	0	0	0
27166526		1689	0		1	1	0.57447	1	1	1	0	0	0	0	0	0	0	0	0	0	0	0	0	0	0	0	0	0	0	0	0	0	0	0
27166526	178.442	170	0		1	1	0.52128	1		0	1	0	0	0	0	0	0	0	0	0	0	0	0	0	0	0	0	0	0	0	0	0	0	0	0
25153483	190.427	189	0	0	0	1	0.38	0	1	1		0	0	0	0	0	0	0	0	0	0	0	0	0	0	0	0	0	0	0	0	0	0	0	0
25153483	583.314	583	0	1		1	0.28723	0	1	1	0	1	1	0	0	1	0	0	0	0	0	1	1	0	0	0	0	0	0	1					0
25153483	970.829	973	0		1	1	0.24468	0	1	1	0	1	1	1	0	1	0	0	0	0	0	1	1	0	0	0	0	0	0	1	0	0	0	0	1
25153483	411.322	425	0	1		0	0.43617	1		0	1	1	1	0	0	0	1	0	0	0	0	0	0	0	0	0	0	0	0	0	0	0	0	0	1
25153483	798.884	800	0		1	0	0.55319	1		0	1	1	1	1	0	0	0	0	0	0	0	0	0	0	0	0	0	0	0	0	0	0	0	0	0
25153483	444.411	444	0	0	0	0	0.53	1	1	1		1	1	0	1	0	0	0	0	0	0	1	1	0	0	0	0	0	0	1	1	1	0	0	0
25153483	1201.84	851	0	1		0	0.55319	1	1	1	0	1	1	1	1	0	0	0	0	0	0	0	0	0	0	0	0	0	0	1	0	0	0	0	0
25153483	1224.86	1240	0		1	0	0.39362	1	1	1	0	1	1	1	1	0	0	0	0	0	0	1	1	0	0	0	0	0	0	1	0	0	0	0	0
25153483	364.859	366	0		1	0	0.39362	0	1	1	1	1	1	0	1	0	0	0	0	0	0	0	0	0	0	0	0	0	0	0	0	0	0	0	0
25153483	372.867	376	0		1	1	0.39362	1	1	1	1	1	1	0	1	0	0	0	0	0	0	0	0	0	0	0	0	0	0	0	0	0	0	0	0
25153483	612.393	612	0	0	0	1	0.56	1	1	1		1	1	1	1	0	0	0	0	0	0	1	1	0	0	0	0	0	0	1	1	1	0	0	1
65618624	1070.43	1074	0	0	0	1	0.63	1	1	1		1	1	1	0	0	0	0	0	0	0	1	1	0	0	1	0	1	0	1	1	1	0	0	0
65618624	697.446	699	0	0	0	0	0.45	1	1	1		1	1	1	0	1	0	0	0	0	0	1	1	0	0	0	0	0	0	1	1	1	1	1	0
65618624	1475.85	1485	0		1	0	0.43617	1	1	1	0	1	1	1	1	1	0	0	0	0	0	1	1	0	0	0	0	0	0	1	1	1	0	0	0
42175284	66.4165	70	0	0	0	0	0.36	1	1	1		0	0	0	0	0	0	0	0	0	0	0	0	0	0	0	0	0	0	0	0	0	0	0	0
42175284	829.302	464	0	1		0	0.39362	1	1	1	0	1	1	1	1	0	0	0	0	0	0	1	1	0	0	0	0	0	0	1					0
42175284	845.448	847	0		1	0	0.39362	1	1	1	0	1	1	1	0	0	0	0	0	0	0	1	1	0	0	0	0	0	0	1					0
42175284	59.4579	83	0		1	0	0.56383	1		0	1	0	0	0	0	0	0	0	0	0	0	0	0	0	0	0	0	0	0	0					0
16454372	511.397	514	0	0	0	0	0.55	0	1	0		1	1	0	1	0	0	0	0	0	0	1	1	0	0	1	1	0	0	1	1	1	1	1	1
16454372	928.463		0	1		0	0.35106	0	1	0	0																								0
16454372	1582.63	1217	0		1	1	0.60638	0	1	0	0	1	1	1	1	0	0	0	0	0	0	0	0	0	0	0	0	0	0	1	1	1	1	1	0
16454372	164.446		0	0	0	1	0.32	0	1	1																									1
16454372	577.466	559	0	1		1	0.29787	0	1	1	0	1	0	0	0	0	0	0	0	0	0	1	1	0	0	0	0	0	0	0	1	1	1	1	0
16454372	1316.31	941	0		1	1	0.095745	0	1	1	0	1	1	1	0	0	0	0	0	0	0	1	1	0	0	0	0	0	0	1					0
16454372	876.614	509	0		1	0	0.52128	1		0	0	1	1	1	0	0	0	0	0	0	0	1	1	0	0	0	0	0	0	1	0	0	0	0	0
77885652	620.543	257	0	1		0	0.39362	1		0	1	0	0	0	0	0	0	0	0	0	0	0	0	0	0	0	0	0	0	0	0	0	0	0	0
77885652	641.521	645	0		1	0	0.42553	1		0	1	1	1	1	0	0	0	0	0	0	0	1	1	0	0	0	0	0	0	1	1	1	1	1	0
77885652	387.392		0	0	0	0	0.53	1	1	0																									0
77885652			0		1						0	1	1	1	0	0	0	0	0	0	0	0	0	0	0	0	0	0	0	0
77885652			0		1						0	1	1	1	0	0	0	0	0	0	0	0	0	0	0	0	0	0	0	0
88172535	589.383	588	0	0	0	1	0.53	0	1	0																									0
88172535	466.89		0		1	0	0.3617	0	1	0	1	1	1	0	0	1	0	0	0	0	0	1	1	0	0	0	0	0	0	1	0	0	0	0	0
88172535	210.396	209	0	0	0	0	0.6	1	1	0		1	0	0	0	0	0	0	0	0	0	1	1	0	0	0	0	0	0	0	0	0	0	0	1
88172535		642	0	1		0	0.6	1	1	0	0	1	1	0	1	0	0	0	0	0	0	1	1	0	0	0	0	0	0	1	0	0	0	0
88172535	992.819	993	0		1	0	0.53191	0	1	0	0	1	0	0	0	0	0	0	0	0	0	1	1	0	0	0	0	0	0	0	0	0	0	0	0
34536783	79.4665	78	0	0	0	0	0.28	1	0	1		0	0	0	0	0	0	0	0	0	0	0	0	0	0	0	0	0	0	0	0	0	0	0	0
34536783	472.374	472	0	1		0	0.17021	0	0	1	0	1	1	1	1	0	0	0	0	0	0	1	1	0	0	1	1	0	0	1	1	0	1	0	0
34536783	861.86	861	0		1	0	0.12766	0	0	1	0	1	1	1	0	1	0	0	0	0	0	0	0	0	0	0	0	0	0	1	1	1	1	1	0
34536783	891.471		0	0	0	1	0.28	1	0	1																									0
34536783	1284.38	1284	0	1		1	0.17021	0	0	1	0	1	1	1	0	0	0	0	0	0	0	1	1	0	0	0	0	0	0	1	1	1	0	0	0
34536783		1676	0		1	1	0.12766	0	0	1	0	1	1	1	0	0	0	0	0	0	0	1	1	0	0	0	0	0	0	1	0	0	0	0
33326332	589.369	589	1	0	0	1	0.56	1	1	1		1	0	0	0	0	0	0	0	0	0	1	1	0	0	0	0	0	0	0	0	0	0	0	0
33326332		960	1	1		1	0.5	1	1	1	0	1	0	0	0	0	0	0	0	0	0	1	1	0	0	0	0	0	0	0	0	0	0	0
33326332	1338.49	1402	1		1	1	0.53191	1	1	1	0	1	0	0	0	0	0	0	0	0	0	1	1	0	0	0	0	0	0	0					0
17284565	838.608	837	0	0	0	1	0.37	0		1		1	1	1	0	0	0	0	0	0	0	0	0	0	0	0	0	0	0	0	1	1	1	1	0
17284565	1216.59	1215	0	1		1	0.24468	0		1	0	1	1	1	0	0	0	0	0	0	0	0	0	0	0	0	0	0	0	0	1	1	0	0	0
17284565	181.608	162	0		1	0	0.074468	0		1	1	0	0	0	0	0	0	0	0	0	0	0	0	0	0	0	0	0	0	0	0	0	0	0	0
17284565	181.614	526	0		1	0	0.074468	0		1	1	0	0	0	0	0	0	0	0	0	0	0	0	0	0	0	0	0	0	0					0
17284565	405.618	385	0		1	0	0.074468	0		1	1	0	0	0	0	0	0	0	0	0	0	0	0	0	0	0	0	0	0	0	0	0	0	0	0
32878844	305.515	305	0	0	0	1	0.43	1	1	0		1	1	1	0	1	0	0	0	0	0	1	0	1	0	0	0	0	0	1					0
32878844	675.409	675	0	1		1	0.3617	0	1	0	0	1	1	1	0	1	0	0	1	0	0	1	1	0	0	0	0	0	0	1	1	1	1	1	0
32878844	1046.61	1043	0		1	1	0.39362	0	1	0	0	1	1	1	0	1	0	0	0	0	0	0	0	0	0	0	0	0	0	1	1	0	1	0	1
32878844	413.52	413	0	0	0	1	0.43	0	1	0		1	1	1	1	0	0	0	0	0	0	0	0	0	0	0	0	0	0	1	1	1	0	0	0
32878844	783.398	783	0	1		1	0.3617	0	1	0	0	1	1	1	1	0	0	0	0	0	0	1	1	0	0	0	0	0	0	1	1	1	1	1	0
32878844		1151	0		1	1	0.39362	0	1	0	0	1	1	1	0	0	0	0	1	0	0	1	1	0	0	0	0	0	0	1	1	1	0	0
32878844	1147.52		0	0	0	1	0.43	0	1	0																									0
32878844	1517.4	1518	0	1		1	0.3617	0	1	0	0	1	1	1	0	1	0	0	0	0	0	0	0	0	0	0	0	0	0	1	0	0	0	0	0
32878844	334.416		0	1		0	0.3617	0	1	0	1																								0
32878844		702	0		1	0	0.39362	0	1	0	1	1	1	1	0	0	0	0	0	0	0	1	1	0	0	0	0	0	0	1	1	1	0	0
32878844	217.393	217	0	1		1	0.48936	0			1	1	1	1	0	0	0	0	0	0	0	0	0	0	0	0	0	0	0	0	1	1	0	0	1
32878844	796.536	796	0	0	0	0	0.4	1	1	0		1	1	1	1	0	0	0	0	0	0	1	1	0	0	0	0	0	0	1	1	1	0	0	0
32878844	1166.44	1166	0	1		0	0.41489	1	1	0	0	1	1	1	0	0	0	0	0	0	0	0	0	0	0	0	0	0	0	0	1	1	0	0	0
32878844	1540.6		0		1	0	0.31915	1	1	0	0	1	1	1	0	1	0	0	0	0	0	1	1	0	0	0	0	0	0	1	1	1	0	0	1
32878844	1171.54	1171	0	0	0	1	0.4	0	1	0		1	1	1	1	0	0	0	0	0	0	1	1	0	0	0	0	0	0	1	1	1	1	1	0
32878844	1541.45	1808	0	1		1	0.41489	1	1	0	0	1	1	1	0	0	0	0	0	0	0	0	0	0	0	0	0	0	0	0					0
32878844	1915.61	1909	0		1	1	0.31915	1	1	0	0	1	1	1	0	0	0	0	0	0	0	1	1	0	0	0	0	0	0	1	1	1	1	1	0
32878844	1386.6	1160	0		1	0	0.31915	0			0	1	1	1	0	1	0	1	0	0	0	1	1	0	0	0	0	0	0	1
32878844	1219.4		0	1		1	0.3617	0			1																								1
32878844	1595.58		0		1	1	0.31915	0			1																								0
32878844		1534	0		1	1	0.31915	0			0	1	0	0	0	0	0	0	0	0	0	1	0	1	0	1	1	0	0	1	1	1	1	1
32878844	424.425	423	0	1		0	0.3617	0			1	1	0	0	0	0	0	0	0	0	0	1	1	0	0	0	0	0	0	0	0	0	0	0	1
32878844		794	0		1	0	0.31915	0			1	1	1	1	0	0	0	0	0	0	0	1	1	0	0	0	0	0	0	1	1	1	1	1
32878844			0	1		0	0.3617				0	1	1	1	0	0	0	0	0	0	0	1	1	0	0	0	0	0	0	1
32878844	254.605	253	0		1	1	0.31915	0			1	1	0	0	0	0	0	0	0	0	0	1	0	1	0	0	0	0	0	0	0	0	0	0	0
87648634	79.4256	81	0	0	0	1	0.43	1	1	0		0	0	0	0	0	0	0	0	0	0	0	0	0	0	0	0	0	0	0	0	0	0	0	0
87648634	445.319	445	0	1		1	0.39362	1	1	0	0	1	0	0	0	0	0	0	0	0	0	1	1	0	0	1	1	0	0	1	0	0	0	0	0
87648634		823	0		1	1	0.52128	1	1	0	0	1	1	1	0	0	0	0	0	0	0	0	0	0	0	0	0	0	0	0	1	1	1	1
87648634	1189.43		0	0	0	1	0.43	1	1	0																									0
87648634	1555.35		0	1		1	0.39362	1	1	0	0																								0
87648634		1998	0		1	1	0.52128	1	1	0	0	1	1	1	0	0	0	0	0	0	0	1	1	0	0	1	1	0	0	1
87648634	371.434	83	0		1	0	0.52128	0	1	0	1	0	0	0	0	0	0	0	0	0	0	0	0	0	0	0	0	0	0	0	0	0	0	0	0
34334762	438.533	437	0	0	0	0	0.45	1	1	1		1	0	0	0	0	0	0	0	0	0	1	1	0	0	0	0	0	0	0	1	1	0	0	0
34334762	844.429	868	0	1		0	0.39362	1	1	1	0	1	1	1	0	0	0	0	0	0	0	0	0	0	0	0	0	0	0	0					0
34334762	1291.35	1303	0		1	0	0.41489	1	1	1	0	1	1	1	0	0	0	0	1	0	0	1	0	1	0	0	0	0	0	1	1	1	1	1	1
34334762	462.528	461	0	0	0	1	0.63	0	1	1		1	1	0	0	0	1	0	0	0	0	0	0	0	0	0	0	0	0	0	1	0	1	0	0
34334762	240.511	249	0	1		1	0.54255	1			1	1	1	0	1	0	1	0	0	0	0	0	0	0	0	1	1	0	0	1	0	0	0	0	0
34334762		696	0		1	1	0.46809	1			1	1	1	1	1	1	0	0	0	0	0	1	1	0	0	1	0	1	0	1	1	0	1	0
75426451	769.599	767	0	0	0	0	0.63	0	1	1		1	0	0	0	0	0	0	0	0	0	1	1	0	0	0	0	0	0	0	0	0	0	0	1
75426451	221.602	219	0	0	0	1	0.46	0	0	1		1	1	1	0	0	0	0	0	0	0	0	0	0	0	0	0	0	0	0	0	0	0	0	0
75426451	900.606	898	0	0	0	1	0.46	1	0	1		1	1	1	0	0	0	0	0	0	0	1	1	0	0	1	1	0	0	1	0	0	0	0	0
75426451		1472	0	1		1	0.35106	1	0	1	0	1	1	1	0	0	0	0	0	0	0	0	0	0	0	0	0	0	0	0
75426451	1647.62	1646	0		1	1	0.26596	0	0	1	0	1	0	0	0	0	0	0	0	0	0	1	1	0	0	1	1	0	0	1	1	0	1	0	0
75426451	995.428	734	0		1	0	0.45745	0			1	1	1	1	0	0	0	0	0	0	0	1	1	0	0	0	0	0	0	1	0	0	0	0	0
38836152	504.467		0	0	0	0	0.49	1	1	1																									0
38836152	874.602	874	0	1		0	0.3617	0	1	1	0	1	0	0	0	0	0	0	0	0	0	1	1	0	0	0	0	0	0	0	0	0	0	0	0
28841117	338.622	340	1	0	0	0	0.43	1	1	1		0	0	0	0	0	0	0	0	0	0	0	0	0	0	0	0	0	0	0	0	0	0	0	0
28841117	732.585	709	1	1		0	0.39362	1	1	1	0	0	0	0	0	0	0	0	0	0	0	0	0	0	0	0	0	0	0	0					0
28841117	1104.6	1108	1		1	0	0.39362	1	1	1	0	0	0	0	0	0	0	0	0	0	0	0	0	0	0	0	0	0	0	0					0
28841117	1026.63		1	0	0	0	0.33	0	1	0																									0
28841117	1420.61		1	1		0	0.37234	0	1	0	0																								0
28841117	1808.51	1791	1		1	0	0.39362	0	1	0	0	1	1	1	0	0	0	0	0	0	0	1	1	0	0	0	0	0	0	1	1	1	1	1	0
28841117	203.407	180	1	1		0	0.37234	1	1	0	1	0	0	0	0	0	0	0	0	0	0	0	0	0	0	0	0	0	0	0					0
28841117	830.494		1		1	0	0.39362	1	1	0	1																								0
36328244	1058.48	1059	0	0	0	0	0.45	0	1	1		1	1	1	0	0	0	0	0	0	0	1	1	0	0	0	0	0	0	1	0	0	0	0	0
36328244	1454.43		0	1		0	0.38298	0	1	1	0																								0
36328244		1823	0		1	0	0.38298	0	1	1	0	1	1	1	0	0	0	0	0	0	0	1	1	0	0	0	0	0	0	1	1	1	0	0
36328244	970.497	971	0	0	0	1	0.55	0	1	1		1	1	1	0	0	0	0	0	0	0	1	1	0	0	0	0	0	0	1	1	1	1	1	0
36328244	1366.45		0	1		1	0.52128	1	1	1	0																								0
36328244		1735	0		1	1	0.52128	1	1	1	0	1	1	1	0	0	0	0	0	0	0	1	1	0	0	1	1	0	0	1	1	1	0	0
36328244	199.454	204	0	1		0	0.6383	1			1	1	1	1	0	1	0	0	0	0	0	1	1	0	0	1	1	0	0	1					0
31834437	1628.31	1648	0	1		1	0.30851	0			0	1	1	1	0	0	0	0	0	0	0	1	1	0	0	0	0	0	0	1	1	1	0	0	0
31834437	2081.56		0		1	1	0.35106	0			0	1	1	1	0	0	0	0	0	0	0	0	0	0	0	0	0	0	0	0	1	1	0	0	0
31834437	1086.56	1086	0	0	0	0	0.39	0	0	1		1	1	1	0	0	0	0	0	0	0	1	1	0	0	0	0	0	0	1	0	0	0	0	1
31834437	1511.31	1533	0	1		0	0.45745	0	0	1	0	1	1	1	0	0	0	0	0	0	0	0	0	0	0	0	0	0	0	0					0
31834437	1964.58	2087	0		1	0	0.43617	0	0	1	0	1	1	1	0	0	0	0	0	0	0	1	1	0	0	0	0	0	0	1					0
45743646	1449.54	1449	0	0	0	1	0.48	0	0	1		1	1	1	0	0	0	0	0	0	0	1	1	0	0	0	0	0	0	1	1	1	0	0	0
74747556	1186.63	1188	0	0	0	1	0.49	0	1	1		1	0	0	0	0	0	0	0	0	0	1	1	0	0	0	0	0	0	0	0	0	0	0	0
74747556	1822.32		0	1		1	0.5	0	1	1	0																								0
74747556	1920.46	1922	0		1	1	0.48936	0	1	1	0	1	1	1	0	0	0	0	0	0	0	0	0	0	0	0	0	0	0	0	1	1	1	1	0
74747556	1099.61		0	0	0	0	0.45	0	1	1																									0
74747556	1735.32	1504	0	1		0	0.39362	1	1	1	0	1	1	1	0	0	0	0	0	0	0	1	1	0	0	0	0	0	0	1	0	0	0	0	0
74747556	1833.37	1841	0		1	0	0.39362	1	1	1	0	1	1	1	0	0	0	0	0	0	0	1	1	0	0	0	0	0	0	1	1	1	1	1	0
74747556	526.331	295	0	1		0	0.39362	1	1	1	1	1	1	1	0	0	0	0	0	0	0	1	1	0	0	0	0	0	0	1					0
74747556	626.406	624	0		1	0	0.39362	0	1	1	1	1	1	1	1	0	0	0	1	0	0	0	0	0	0	0	0	0	0	1	1	1	0	0	1
74747556	150.41	149	0		1	1	0.39362	1	1	1	1	1	1	0	1	0	0	0	0	0	0	0	0	0	0	0	0	0	0	0					0
74747556	124.361	125	0		1	0	0.39362	1	1	1	1	0	0	0	0	0	0	0	0	0	0	0	0	0	0	1	1	0	0	0	0	0	0	0	0
74747556			0		1		0.39362		1	1	0	1	1	1	0	0	0	0	0	0	0	1	1	0	0	0	0	0	0	1
74747556	826.636	835	0	0	0	0	0.55	1	1	1		1	1	1	1	0	0	0	0	0	0	1	1	0	0	0	0	0	0	1	1	1	0	0	0
74747556	1232.42	1192	0	1		0	0.55	0	1	1	0																				1	1	1	1	0
22324523	86.62	86	0	0	0	0	0.43	1	1	1		0	0	0	0	0	0	0	0	0	0	0	0	0	0	0	0	0	0	0	0	0	0	0	0
22324523	464.551		0	1		0	0.39362	0	1	1	0																								0
82158738	165.532	164	0	0	0	0	0.43	1	1	1		1	1	0	1	0	0	0	0	0	0	0	0	0	0	0	0	0	0	0	0	0	0	0	0
82158738	82.5378	81	0	0	0	0	0.4	1	1	1																					0	0	0	0	0
38765412	1204.53		0	0	0	1	0.27	1	0	1																									0
38765412	1577.52		0	1		1	0.28723	1	0	1	0																								0
38765412	1962.52	2114	0		1	1	0.34043	0	0	1	0	1	1	1	1	0	0	0	0	0	0	1	1	0	0	0	0	0	0	1					0
85868815	379.466	379	0	0	0	1	0.35	0	1	1		1	1	1	0	0	0	0	0	0	0	0	0	0	0	0	0	0	0	0	0	0	0	0	0
85868815	749.498	748	0	1		1	0.39362	1	1	1	0	1	1	0	1	0	0	0	0	0	0	1	1	0	0	0	0	0	0	1	0	0	0	0	1
85868815	1123.56	1125	0		1	1	0.55319	0	1	1	0	1	1	1	0	0	0	0	0	0	0	1	1	0	0	1	1	0	0	1	0	0	0	0	0
85868815	1148.48		0	0	0	0	0.38	0	1	1																									0
85868815	1518.49	1517	0	1		0	0.34043	0	1	1	0	1	1	1	0	0	0	0	0	0	0	1	1	0	0	1	1	0	0	1	1	1	0	0	0
85868815		1894	0		1	0	0.47872	0	1	1	0	1	1	1	0	0	0	0	0	0	0	1	1	0	0	0	0	0	0	1	1	1	0	0
85868815	433.505	433	0		1	1	0.47872	1	1	1	1	0	0	0	0	0	0	0	0	0	0	0	0	0	0	1	1	0	0	0	0	0	0	0	0
21714176	238.564		0	0	0	1	0.43	1	1	0																									0
21714176	621.484		0	1		1	0.39362	0	1	0	0																								0
21714176	971.378	972	0		1	1	0.39362	1	1	0	0	1	0	0	0	0	0	0	0	0	0	1	1	0	0	0	0	0	0	0	0	0	0	0	0
21714176	358.403	358	0	1		0	0.19149	0			1	1	0	0	0	0	0	0	0	0	0	1	1	0	0	1	1	0	0	1	0	0	0	0	1
21714176	726.39	726	0		1	0	0.26596	0			1	1	1	1	1	0	0	0	0	0	0	1	1	0	0	0	0	0	0	1	0	0	0	0	0
87677144	554.612		0	0	0	1	0.26	0	1	1																									0
87677144	928.504	928	0	1		1	0.3617	1	1	1	0	1	1	1	1	0	0	0	1	0	0	0	0	0	0	0	0	0	0	1	1	1	0	0	0
87677144	1568.46	1314	0		1	1	0.28723	0	1	1	0	1	1	1	0	0	0	0	0	0	0	0	0	0	0	0	0	0	0	0	1	1	0	0	0
87677144	1003.63		0	0	0	1	0.26	0	1	0																									0
87677144	404.602	404	0	0	0	1	0.45	1	1	1		1	1	0	0	1	0	0	0	0	0	0	0	0	0	0	0	0	0	0	1	0	1	0	0
87677144	778.526	778	0	1		1	0.39362	1	1	1	0	1	0	0	0	0	0	0	0	0	0	1	1	0	0	0	0	0	0	0					0
87677144	1163.46	1160	0		1	1	0.48936	1	1	1	0	0	0	0	0	0	0	0	0	0	0	0	0	0	0	0	0	0	0	0					0
36546772	269.633	268	0	0	0	1	0.45	1	1	1		1	1	1	0	0	0	0	0	0	0	0	0	0	0	0	0	0	0	0	1	1	1	1	0
36546772	269.636		0	0	0	0	0.45	1	1	1																									0
36546772	1024.55	1023	0		1	0	0.54255	0	1	1	0	1	1	1	1	1	0	0	0	0	0	1	1	0	0	0	0	0	0	1					0
36546772	1069.64	1067	0	0	0	1	0.45	0	1	1		1	1	1	0	0	0	0	0	0	0	1	1	0	0	0	0	0	0	1	1	1	0	0	0
36546772	1478.7	1653	0	1		1	0.46809	0	1	1	0	1	1	1	0	0	0	0	0	0	0	0	0	0	0	0	0	0	0	0					0
36546772	1824.56	1823	0		1	1	0.54255	0	1	1	0	1	1	1	0	0	0	0	0	0	0	1	1	0	0	0	0	0	0	1	1	1	1	1	0
36546772	1321.64	1319	0	0	0	1	0.45	0	1	1		1	1	1	0	0	0	0	0	0	0	1	1	0	0	0	0	0	0	1	1	1	1	1	0
36546772	2076.57	2147	0		1	1	0.54255	0	1	1	0	1	1	1	0	1	0	0	0	0	0	1	1	0	0	0	0	0	0	1					0
36546772	523.504	523	0	1		1	0.32979	0			1	1	1	1	0	1	0	0	0	0	0	1	1	0	0	0	0	0	0	1	1	1	1	1	1
36546772	912.53	910	0		1	1	0.3617	0			1	1	1	1	1	1	0	0	0	0	0	1	1	0	0	0	0	0	0	1					0
36546772	523.511	523	0	1		0	0.32979	0			1	1	0	0	0	0	0	0	0	0	0	1	1	0	0	1	1	0	0	1	1	1	1	1	1
36546772	912.539	911	0		1	0	0.3617	0			1	1	1	1	1	1	0	0	0	0	0	1	1	0	0	0	0	0	0	1	1	1	0	0	0
36546772	134.62	132	0	0	0		0.45	0	1	1		0	0	0	0	0	0	0	0	0	0	0	0	0	0	0	0	0	0	0	0	0	0	0	0
36546772			0		1		0.42553				0	1	1	1	0	1	0	0	0	0	0	1	1	0	0	0	0	0	0	1
63716216	364.41	364	1	0	0	1	0.43	1	1	1		1	1	0	1	1	0	0	0	0	0	1	1	0	0	1	0	1	0	1	1	0	1	0	0
63716216	534.413	534	1	0	0	1	0.43	1	1	1		0	0	0	0	0	0	0	0	0	0	0	0	0	0	0	0	0	0	0	0	0	0	0	0
63716216	211.416		1	0	0	1	0.43	0	1	1																									0
63716216	154.635	153	1	1		1	0.34043	1			1	1	1	0	1	0	0	0	0	0	0	0	0	0	0	0	0	0	0	0	0	0	0	0	0
14378133	136.912	136	0	0	0	0	0.42	1	1	1		0	0	0	0	0	0	0	0	0	0	0	0	0	0	0	0	0	0	0	0	0	0	0	0
14378133	516.452		0	1		0	0.41489	1	1	1	0																								0
14378133	1152.38	884	0		1	0	0.38298	0	1	1	0	1	1	1	0	1	0	0	0	0	0	1	1	0	0	0	0	0	0	1	1	1	0	0	0
14378133	1236.38	1254	0	0	0	0	0.37	0	1	1		1	0	0	0	0	0	0	0	0	0	1	1	0	0	0	0	0	0	0					0
14378133	1638.32	1615	0	1		0	0.53191	0	1	1	0	1	1	1	0	1	0	0	0	0	0	1	1	1	0	1	1	0	0	1	0	0	0	0	0
14378133	252.458	262	0	0	0	1	0.45	0	1	1		0	0	0	0	0	0	0	0	0	0	0	0	0	0	0	0	0	0	0	0	0	0	0	1
14378133	623.381	625	0	1		1	0.48936	1	1	1	0	1	1	1	1	0	0	0	0	0	0	1	1	0	0	0	0	0	0	1					0
14378133	1257.39		0		1	1	0.41489	0	1	1	0																								0
35132144	1143.35	1142	0	0	0	1	0.43	0	1	1		1	0	0	0	0	0	0	0	0	0	1	1	0	0	0	0	0	0	0	0	0	0	0	0
35132144	1511.52	1718	0	1		1	0.39362	0	1	1	0	0	0	0	0	0	0	0	0	0	0	0	0	0	0	0	0	0	0	0					0
35132144	2150.5	1891	0		1	1	0.46809	1	1	1	0	1	1	1	0	0	1	0	0	0	0	0	0	0	0	0	0	0	0	1	0	0	0	0	0
62558135	1521.37	1524	0	0	0	1	0.36	0	1	1		1	1	1	0	0	0	0	0	0	0	1	1	0	0	0	0	0	0	1	1	1	1	1	0
62558135	1903.38	1902	0	1		1	0.41489	0	1	1	0	1	1	1	0	0	0	0	0	0	0	1	1	0	0	0	0	0	0	1	1	1	0	0	0
62558135	59.367		0	0	0	1	0.37	0	1	1																									0
62558135	441.426	440	0	1		1	0.30851	0	1	1	0	1	1	0	1	0	0	0	0	0	0	1	1	0	0	0	0	0	0	1	1	1	0	0	0
62558135	43.3378	44	0		1	0	0.60638	1			1	0	0	0	0	0	0	0	0	0	0	0	0	0	0	0	0	0	0	0					0
84424228	675.412		0	0	0	1	0.53	1	1	1																									0
84424228	1058.57		0	1		1	0.5	1	1	1	0																								0
84424228	784.398		0	0	0	1	0.56	1	1	1																									0
84424228	67.3904		0	0	0	1	0.39	1	1	1																									0
84424228	447.335		0	1		1	0.60638	1	1	1	0																								0
84424228	821.522	815	0		1	1	0.42553	0	1	1	0	1	0	0	0	0	0	0	0	0	0	1	1	0	0	0	0	0	0	0	1	0	1	0	0
81647441	658.472	658	0	0	0	1	0.58	1	1	1		1	1	1	0	0	0	0	0	0	0	0	0	0	0	0	0	0	0	0					1
81647441	1040.52	1040	0	1		1	0.57447	1	1	1	0	1	1	0	1	0	0	0	0	0	0	1	1	0	0	0	0	0	0	1	0	0	0	0	0
81647441	1412.41	1412	0		1	1	0.60638	1	1	1	0	1	0	0	0	0	0	0	0	0	0	1	1	0	0	0	0	0	0	0					0
54476126	1271.5	1275	0	0	0	1	0.52	1	1	1		1	1	1	0	0	0	0	0	0	0	1	1	0	0	0	0	0	0	1	0	0	0	0	0
54476126		1661	0	1		1	0.38298	1	1	1	0	1	1	1	1	0	0	0	0	0	0	1	1	1	0	0	0	0	0	1
41666457	403.352	404	0	0	0	1	0.45	0	1	1		1	1	1	1	1	0	0	0	0	0	1	1	0	0	1	1	0	0	1					0
41666457	787.44	791	0	1		1	0.52128	0	1	1	0	0	0	0	0	0	0	0	0	0	0	0	0	0	0	0	0	0	0	0	0	0	0	0	1
41666457	1162.34	1167	0		1	1	0.42553	0	1	1	0	1	1	1	0	0	0	0	0	0	0	1	1	0	0	0	0	0	0	1	0	0	0	0	0
41666457	1457.35	1456	0	0	0	0	0.45	0	1	1		1	1	0	1	0	0	0	0	0	0	1	1	0	0	0	0	0	0	1					0
41666457	1841.45	1851	0	1		0	0.52128	0	1	1	0	1	1	1	0	0	0	0	0	0	0	1	1	0	0	0	0	0	0	1	1	1	0	0	0
41666457	2216.34	2220	0		1	0	0.42553	0	1	1	0	1	1	0	1	0	0	0	0	0	0	0	0	0	0	0	0	0	0	0	1	1	0	0	0
67411526	425.223	340	0	1		1	0.45745	0			1	0	0	0	0	0	0	0	0	0	0	0	0	0	0	0	0	0	0	0	0	0	0	0	0
67411526	816.394	816	0		1	1	0.48936	0			1	1	0	0	0	0	0	0	0	0	0	1	1	0	0	0	0	0	0	0					0
67411526			0	0	0	1	0.55	1	1	1		1	1	1	0	0	0	0	0	0	0	1	1	0	0	0	0	0	0	1	1	1	0	0	0
21157244	823.394		0	0	0	1	0.45	0	1	1																									0
21157244	1206.41		0	1		1	0.44681	0	1	1	0																								0
21157244	1684.48	1836	0		1	1	0.43617	0	1	1	0	1	1	1	1	0	0	1	0	0	0	1	1	0	0	0	0	0	0	1					0
21157244	811.385		0	0	0	1	0.46	1	1	1																									0
21157244	306.402	312	0	1		1	0.58511	1			1	1	1	0	1	0	1	0	0	0	0	0	0	0	0	0	0	0	0	1	0	0	0	0	0
21157244	784.486	780	0		1	1	0.60638	0			1	1	0	0	0	0	0	0	0	0	0	1	1	0	0	0	0	0	0	0					0
24534171	778.424		0	0	0	0	0.58	1	1	1																									0
24534171	141.417	143	0	0	0	0	0.61	1	1	1		0	0	0	0	0	0	0	0	0	0	0	0	0	0	0	0	0	0	0					0
24534171	523.302	524	0	1		0	0.60638	1	1	1	0	1	0	0	0	0	0	0	0	0	0	1	1	0	0	0	0	0	0	0	0	0	0	0	1
24534171	1002.47	1001	0		1	0	0.68085	0	1	1	0	1	0	0	0	0	0	0	0	0	0	1	1	0	0	1	1	0	0	1					0
76187155	249.42		0	0	0	0	0.63	1	1	1																									0
76187155		1196	0		1	0	0.63	1	1	1	0	1	1	0	0	1	0	0	0	0	0	1	1	0	0	0	0	0	0	1
76187155	275.442	274	0	0	0	1	0.42	0	1	1		1	1	0	0	0	0	1	0	0	0	0	0	0	0	0	0	0	0	0	0	0	0	0	0
76187155	659.359	654	0	1		1	0.44681	0	1	1	0	1	1	1	1	0	0	0	0	0	0	1	1	0	0	0	0	0	0	1	1	1	0	0	0
76187155	1065.35	1222	0		1	1	0.44681	0	1	1	0	1	1	1	0	0	0	0	0	0	0	1	1	0	0	0	0	0	0	1					0
76187155	517.459	294	0		1	1	0.44681	1	1	1	1	1	1	0	1	0	0	0	0	0	0	0	0	0	0	0	0	0	0	0					0
76187155	1800.51		0	1		1	0.52128	1			0																								0
76187155	2212.39	2400	0		1	1	0.52128	1			0	1	1	1	0	0	0	0	0	0	0	1	1	0	0	0	0	0	0	1					0
76187155	1064.51	1068	0	1		0	0.52128	1			0	1	1	1	0	0	0	0	0	0	0	1	1	0	0	0	0	0	0	1	1	1	0	0	0
76187155	1476.4	1474	0		1	0	0.52128	1			0	1	1	1	0	0	0	0	0	0	0	1	1	0	0	0	0	0	0	1	1	1	0	0	0
76187155	206.352	208	0	1		1	0.45745	0			0	1	1	0	1	0	0	0	0	0	0	1	1	0	0	1	0	1	0	1	0	0	0	0	1
76187155	620.342	621	0		1	1	0.38298	0			0	1	1	1	1	0	0	0	0	0	0	1	1	0	0	0	0	0	0	1	1	1	1	1	1
76187155	1136.36	1138	0	1		1	0.45745	0			0	1	1	1	0	0	0	0	0	0	0	1	1	0	0	0	0	0	0	1	0	0	0	0	0
76187155	1550.34	1702	0		1	1	0.38298	0			0	1	1	1	0	0	0	0	0	0	0	1	1	0	0	0	0	0	0	1					0
76321241	600.42		0	0	0	0	0.37	0	1	1																									0
76321241	983.391	982	0	1		0	0.28723	0	1	1	0	1	1	1	0	0	0	0	0	0	0	1	1	0	0	0	0	0	0	1	1	1	1	1	0
76321241	1459.26	1457	0		1	0	0.45745	0	1	1	0	1	0	0	0	0	0	0	0	0	0	1	1	0	0	0	0	0	0	0					0
76321241	977.46		0	0	0	1	0.46	1	1	1																									0
26454273	1261.45	1261	0	0	0	1	0.4	1	1	0		1	1	0	0	0	0	1	0	0	0	1	1	0	0	1	0	1	0	1	1	1	0	0	0
26454273	918.462		0	0	0	1	0.4	1	1	1																									0
26454273	1729.42	1720	0		1	1	0.41489	0	1	1	0	0	0	0	0	0	0	0	0	0	0	0	0	0	0	0	0	0	0	0					0
26454273	127.19	125	0	1		1	0.4	1	1	1	1	1	1	1	1	0	0	0	0	0	0	1	1	0	0	0	0	0	0	1	0	0	0	0	0
26454273	561.42	552	0		1	1	0.41489	0	1	1	1	0	0	0	0	0	0	0	0	0	0	0	0	0	0	0	0	0	0	0					0
26454273	403.47	403	0	0	0	1	0.47	1	1	0		1	1	0	1	0	0	0	0	0	0	0	0	0	0	0	0	0	0	0	0	0	0	0	0
26454273	1045.57	778	0	1		1	0.48936	1	1	0	0	1	1	0	0	1	0	0	0	0	0	0	0	0	0	0	0	0	0	0	0	0	0	0
26454273	79.4845	79	0		1	0	0.45745	1	1	0	1	0	0	0	0	0	0	0	0	0	0	0	0	0	0	0	0	0	0	0					0
26454273	1009.67	956	0		1	1	0.45745	1	1	0	1	1	0	0	0	0	0	0	0	0	0	1	1	0	0	1	1	0	0	1					1
56777867	461.679	461	0	0	0	1	0.33	0	1	1		0	0	0	0	0	0	0	0	0	0	0	0	0	0	0	0	0	0	0	0	0	0	0	0
56777867	862.42	811	0	1		1	0.39362	1	1	1	0	1	0	0	0	0	0	0	0	0	0	1	1	0	0	0	0	0	0	0	1	0	1	0	0
56777867	1005.68		0	0	0	0	0.33	0	1	1																									0
56777867	1406.42	1355	0	1		0	0.39362	1	1	1	0	1	1	0	1	0	0	0	0	0	0	1	1	0	0	0	0	0	0	1	0	0	0	0	0
56777867		1978	0		1	0	0.28723	1	1	1	0	1	1	1	1	0	0	0	0	0	0	1	1	0	0	0	0	0	0	1
66642622	379.602	377	0	0	0	1	0.61	0	1	1		1	1	0	0	1	0	0	0	0	0	0	0	0	0	0	0	0	0	0	0	0	0	0	0
66642622	713.53		0	1		1	0.40426	1	1	1	0																								0
86836312	1606.43	1605	0	1		0	0.41489	1			0	1	1	1	1	0	0	0	0	0	0	1	1	0	0	0	0	0	0	1	1	1	1	1	0
86836312			0	0	0							1	1	1	0	0	0	0	0	0	0	1	1	0	0	0	0	0	0	1	1	1	0	0
86836312	176.525	177	0	1		1	0.57447	1			1	0	0	0	0	0	0	0	0	0	0	0	0	0	0	0	0	0	0	0					0
86836312			0	0	0							1	1	1	0	1	0	0	0	0	0	0	0	0	0	0	0	0	0	1	1	1	1	1
42563683	151.608	155	0	0	0	0	0.43	0	1	1		0	0	0	0	0	0	0	0	0	0	0	0	0	0	0	0	0	0	0	0	0	0	0	0
42563683	350.616	350	0	0	0	1	0.35	1	1	1		1	1	1	0	1	1	0	0	0	0	0	0	0	0	1	1	0	0	1	1	1	0	0	0
42563683	721.531	721	0	1		1	0.2766	0	1	1	0	1	1	1	0	0	0	0	0	0	0	1	1	0	0	0	0	0	0	1	1	1	0	0	0
64133326	534.54	534	0	0	0	1	0.46	0	1	1		1	1	1	1	0	0	0	0	0	0	1	1	0	0	0	0	0	0	1	1	1	0	0	0
64133326	926.371	926	0		1	0	0.43617	0	1	1	0																								1
64133326	210.374	209	0		1	1		1			1	1	0	0	0	0	0	0	0	0	0	1	0	1	0	1	1	0	0	1					0
64133326	353.557	353	0	0	0	1	0.45	0	1	1		0	0	0	0	0	0	0	0	0	0	0	0	0	0	0	0	0	0	0	1	0	1	0	0
64133326	720.652	718	0	1		1	0.39362	0	1	1	0	1	1	1	0	1	0	0	0	0	0	1	1	0	0	0	0	0	0	1	1	0	1	0	0
64133326	1132.39	1131	0		1	1	0.52128	1	1	1	0	1	1	1	0	0	0	0	0	0	0	1	1	1	0	1	1	0	0	1					0
64133326	541.561	541	0	0	0	1	0.45	0	1	1		1	1	1	1	0	1	0	0	0	0	1	1	0	0	0	0	0	0	1	0	0	0	0	0
64133326	938.466	906	0	1		1	0.39362	0	1	1	0	1	1	1	0	1	0	0	0	0	0	1	1	0	0	0	0	0	0	1	1	1	0	0	0
64133326	1346.57	1346	0	0	0	0	0.45	0	1	1		1	1	1	1	1	0	0	0	0	0	1	1	0	0	0	0	0	0	1	1	1	0	0	0
64133326	1743.47	1711	0	1		0	0.39362	0	1	1	0	1	1	1	1	1	0	0	0	0	0	1	1	0	0	0	0	0	0	1	0	0	0	0	0
72355664	992.49	991	0	0	0	1	0.48	0	1	1																									0
72355664		1969	0		1	1	0.30851	0	1	1	0	1	1	1	1	0	0	1	0	0	0	0	0	0	0	0	0	0	0	1
72355664	320.392	98	0		1	0	0.30851	0	1	1	1	0	0	0	0	0	0	0	0	0	0	0	0	0	0	0	0	0	0	0					0
72355664	1220.39	999	0		1	1	0.30851	0	1	1	0	1	1	1	0	0	0	0	0	0	0	1	1	0	0	0	0	0	0	1					1
45218475	891.514		0	0	0	0	0.63	1	1	1																									0
45218475	1301.44	1265	0	1		0	0.6383	1	1	1	0	1	0	0	0	0	0	0	0	0	0	1	1	0	0	1	1	0	0	1	0	0	0	0	0
45218475	1926.36	1712	0		1	0	0.48936	0	1	1	0	1	0	0	0	0	0	0	0	0	0	1	1	0	0	0	0	0	0	0					0
45218475	1163.52		0	0	0	1	0.53	1	1	1																									0
45218475	1573.46		0	1		1	0.55319	1	1	1	0																								0
45218475	2198.36	1985	0		1	1	0.48936	1	1	1	0	1	1	1	0	0	0	0	0	0	0	0	0	0	0	0	0	0	0	0					0
45218475	1096.4	1095	0	0	0	0	0.52	0	1	1		0	0	0	0	0	0	0	0	0	0	0	0	0	0	0	0	0	0	0	1	1	0	0	0
45218475	1520.27	1469	0	1		0	0.5	0	1	1	0	0	0	0	0	0	0	0	0	0	0	0	0	0	0	0	0	0	0	0	0	0	0	0	0
71635243	580.562	580	0	0	0	0	0.28	0	1	1		0	0	0	0	0	0	0	0	0	0	0	0	0	0	0	0	0	0	0	1	1	1	1	0
71635243	1213.99	938	0	1		0	0.25532	0	1	1	0	1	1	1	0	0	0	0	0	0	0	0	0	0	0	0	0	0	0	0	1	1	0	0	0
71635243	1375.55	1372	0		1	0	0.29787	0	1	1	0	1	1	1	0	0	0	0	0	0	0	1	1	0	0	0	0	0	0	1	1	1	0	0	0
71635243	1298.51	1259	0	1		0	0.48936	0			0	1	1	1	0	0	0	0	0	0	0	1	1	0	0	0	0	0	0	1	1	1	1	1	0
71635243	1633.52		0	1		0	0.48936	0			0																								0
57645687			0	0	0	0	0.45	0	1	1		1	1	1	1	0	0	0	0	0	0	1	1	0	0	0	0	0	0	1	1	1	0	0	0
57645687	1660.48	1660	0	0	0		0.45	0	1	1		1	1	1	0	0	0	0	0	0	0	1	1	0	0	0	0	0	0	1	0	0	0	0	0
57645687	1451.49	1448	0	0	0	1	0.45	0	1	1		1	1	1	1	0	0	0	1	0	0	1	1	0	0	0	0	0	0	1	1	1	1	1	0
57645687	2243.49	2398	0		1	1	0.55319	0	1	1	0	1	1	1	1	0	0	0	0	0	0	0	0	0	0	0	0	0	0	1					0
57645687	168.4	170	0	1		0	0.55319	0	1	1	1	1	1	0	1	0	0	0	0	0	0	0	0	0	0	0	0	0	0	0	0	0	0	0	0
57645687	573.477	728	0		1	0	0.55319	0	1	1	1	1	1	0	0	1	0	0	0	0	0	1	1	0	0	0	0	0	0	1					0
57645687	69.5303	69	0	0	0	1	0.41	1	1	1		0	0	0	0	0	0	0	0	0	0	0	0	0	0	0	0	0	0	0	0	0	0	0	0
57645687	464.49		0	1		1	0.29787	1	1	1	0																								0
57645687	1315.54	1314	0	0	0	0	0.41	1	1	1		1	1	0	1	0	0	0	0	0	0	0	0	0	0	0	0	0	0	0	1	1	1	1	0
57645687	1710.49		0	1		0	0.29787	1	1	1	0																								0
57645687	244.503	245	0	0	0	0	0.42	1	1	1		1	1	0	1	0	0	0	0	0	0	1	1	0	0	0	0	0	0	1	1	0	1	0	1
57645687	634.386	636	0	1		0	0.3617	0	1	1	0	1	1	0	1	1	0	0	1	0	0	1	1	0	0	0	0	0	0	1	1	1	0	0	0
57645687	1040.46	1207	0		1	0	0.39362	0	1	1	0	1	1	1	0	0	0	0	0	0	0	1	1	0	0	0	0	0	0	1					0
57645687	685.483	682	0	0	0	1	0.42	0	1	1		1	1	1	1	0	0	0	0	0	0	1	1	0	0	0	0	0	0	1	0	0	0	0	0
57645687	1072.39	1275	0	1		1	0.3617	0	1	1	0	1	1	1	1	0	0	0	0	0	0	1	1	0	0	1	1	0	0	1					0
34768373	895.311	894	0		1	0	0.3617	0			0	1	1	1	1	0	0	0	0	0	0	0	0	0	0	0	0	0	0	1					0
34768373	801.468		0	0	0	1	0.39	0	1	1																									0
34768373	1036.47	1036	0	0	0	1	0.39	0	1	1		1	1	1	1	0	0	0	0	0	0	1	1	0	0	0	0	0	0	1	0	0	0	0	0
34768373	1463.31	1463	0	1		1	0.40426	0	1	1	0	1	1	1	0	0	0	1	0	0	0	1	1	0	0	0	0	0	0	1	1	1	0	0	0
46268546	397.643		0	0	0	1	0.36	1	1	0																									0
46268546	771.374		0	1		1	0.60638	1	1	0	0																								0
46268546	1185.33		0		1	1	0.60638	1	1	0	0	1	1	1	0	0	0	0	0	0	0	1	1	0	0	0	0	0	0	1					0
46268546	1599.51	1569	0	1		0	0.35106	1			0	1	1	1	1	0	0	0	0	0	0	1	1	0	0	0	0	0	0	1	1	1	0	0	0
46268546	2206.4	1963	0		1	0	0.51064	1			0	0	0	0	0	0	0	0	0	0	0	0	0	0	0	0	0	0	0	0					0
46268546	517.391	274	0		1	1	0.51064	1			1	1	1	1	0	0	0	0	0	0	0	1	1	0	0	0	0	0	0	1					1
46268546	451.387	452	0	1		1	0.48936	1			1	1	1	1	1	0	0	0	0	0	0	0	0	0	0	0	0	0	0	1					0
46268546	1518.4		0	1		0	0.48936	1			0																								0
46268546	868.424	625	0		1	1	0.48936	1			0	0	0	0	0	0	0	0	0	0	0	0	0	0	0	1	1	0	0	0
48848631	335.363	335	0	0	0	1	0.43	1	1	1		0	0	0	0	0	0	0	0	0	0	0	0	0	0	0	0	0	0	0	0	0	0	0	0
48848631	706.355	706	0	1		1	0.24468	0	1	1	0	1	1	1	0	0	0	0	0	0	0	0	0	0	0	0	0	0	0	0	0	0	0	0	0
48848631	1122.35	1119	0		1	1	0.24468	0	1	1	0	1	1	1	0	0	0	0	0	0	0	1	1	0	0	0	0	0	0	1					0
67452371	862.423		0	0	0	1	0.33	0	1	1																									0
67452371	1288.59	1289	0	1		1	0.55319	1	1	1	0	1	0	0	0	0	0	0	0	0	0	1	1	0	0	0	0	0	0	0	0	0	0	0	0
67452371	120.429	120	0	0	0	0	0.63	1	1	1		0	0	0	0	0	0	0	0	0	0	0	0	0	0	0	0	0	0	0					0
67452371	497.273	496	0	1		0	0.45745	1	1	1	0	1	1	0	1	0	0	0	0	0	0	0	0	0	0	1	1	0	0	1	0	0	0	0	0
67452371	336.439	336	0	0	0	1	0.63	1	1	1		0	0	0	0	0	0	0	0	0	0	0	0	0	0	0	0	0	0	0	0	0	0	0	0
67452371	685.291	684	0	1		1	0.60638	1	1	1	1	1	0	0	0	0	0	0	0	0	0	1	0	1	0	0	0	0	0	0	1	0	1	0	1
28667176	1038.4	1038	0	0	0	0	0.51	1	1	0		1	1	1	0	0	0	0	0	0	0	1	1	0	0	0	0	0	0	1	0	0	0	0	0
28667176		1631	0	1		0	0.51	1	1	0	0	1	1	0	1	0	0	0	0	0	0	1	1	0	0	0	0	0	0	1
28667176	1822.37	1827	0		1	0	0.60638	0	1	0	0	1	1	1	0	0	0	0	0	0	0	0	0	0	0	1	1	0	0	1					0
28667176	406.374	405	0		1	0	0.60638	0	1	0	1	1	1	1	0	0	0	0	0	0	0	0	0	0	0	0	0	0	0	0	0	0	0	0	0
28667176	861.331	861	0		1	0	0.60638	0			0	1	1	1	0	0	0	0	0	0	0	1	1	0	0	0	0	0	0	1	1	1	1	1	0
16525821	820.418	820	0	0	0	1	0.56	0	1	1		1	0	0	0	0	0	0	0	0	0	1	1	0	0	1	1	0	0	1	0	0	0	0	0
16525821	1194.35	1194	0	1		1	0.57447	1	1	1	0	1	1	1	0	0	0	0	0	0	0	1	1	0	0	0	0	0	0	1	0	0	0	0	0
16525821	440.329		0		1	1	0.52128	0			0	1	1	0	0	0	0	1	0	0	0	0	0	0	0	1	0	0	1	1					0
13745782	498.475	498	0	0	0	0	0.39	1	1	0		1	1	0	1	0	0	0	0	0	0	0	0	0	0	0	0	0	0	0	0	0	0	0	0
13745782	877.291	875	0	1		0	0.43617	1	1	0	0	1	0	0	0	0	0	0	0	0	0	1	1	0	0	0	0	0	0	0	1	0	1	0	0
13745782	1353.68	1286	0		1	0	0.43617	1	1	0	0	1	1	1	0	0	0	0	0	0	0	1	1	0	0	0	0	0	0	1	0	0	0	0	0
13745782	78.3908	77	0	0	0	1	0.41	1	1	1		0	0	0	0	0	0	0	0	0	0	0	0	0	0	0	0	0	0	0	0	0	0	0	0
13745782	316.497	316	0	0	0	1	0.42	0	1	0		1	1	0	1	0	0	0	0	0	0	0	0	0	0	1	0	1	0	1	0	0	0	0	0
13745782	695.283	693	0	1		1	0.45745	1	1	0	0	1	1	1	0	0	0	0	0	0	0	1	1	0	0	0	0	0	0	1	0	0	0	0	0
13745782	1171.36	1104	0		1	1	0.52128	0	1	0	0	1	1	1	0	0	0	0	0	0	0	1	1	0	0	0	0	0	0	1					1
16781873	892.402		0	0	0	0	0.47	1	1	1																									0
16781873	1271.49		0	1		0	0.38298	1	1	1	0																								0
16781873	1673.56	1674	0		1	0	0.46809	1	1	1	0	1	1	1	1	0	0	0	0	0	0	0	0	0	0	0	0	0	0	1					0
16781873	467.56	467	0		1	0	0.46809	1	1	1	1	1	1	0	1	0	0	0	0	0	0	1	1	0	0	0	0	0	0	1	1	1	1	1	0
16781873	954.39		0	0	0	0	0.4	1	1	1																									0
16781873	296.55	296	0	0	0	1	0.49	1	1	1		1	1	0	0	0	1	1	0	0	0	1	1	0	0	1	1	1	0	1	0	0	0	0	1
16781873	676.509	666	0	1		1	0.38298	1	1	1	0	1	0	0	0	0	0	0	0	0	0	1	1	0	0	0	0	0	0	0	0	0	0	0	1
16781873		1128	0		1	1	0.38298	1	1	1	0	1	1	1	1	0	0	0	0	0	0	1	1	0	0	0	0	0	0	1
16781873	825.556	825	0	0	0	0	0.49	1	1	1		1	1	1	1	0	0	0	0	0	0	1	1	0	0	1	0	1	0	1	1	1	0	0	0
16781873	1205.52	1195	0	1		0	0.38298	1	1	1	0	1	1	1	0	1	0	0	0	0	0	1	1	0	0	0	0	0	0	1	1	1	1	1	0
16781873	230.524	220	0	1		1	0.38298	1	1	1	1	1	0	0	0	0	0	0	0	0	0	1	1	0	0	0	0	0	0	0					0
16781873		683	0		1	1	0.38298	1	1	1	1	1	1	1	0	0	0	0	0	0	0	1	1	0	0	0	0	0	0	1
16781873			0		1	0	0.41489	0			0	1	1	1	0	0	0	0	0	0	0	1	0	1	0	0	0	0	0	1
16781873	278.501	268	0	1		0	0.38298	0			1	1	0	0	0	0	0	0	0	0	0	1	1	0	0	0	0	0	0	0	0	0	0	0	0
16781873	681.569	681	0		1	0	0.38298	0			1	1	0	0	0	0	0	0	0	0	0	1	1	0	0	0	0	0	0	0					0
63185575	1055.6		0	0	0	1	0.63	0	0	1																									0
88471836	497.459		0	0	0		0.5	1	1	1																									1
88471836	1279.39	1278	0		1		0.46809	1	1	1	0	1	1	1	0	0	0	0	0	0	0	1	1	0	0	0	0	0	0	1	1	1	1	1	0
24585428	1322.62	1322	0	0	0	0	0.49	0	1	1		1	1	1	0	0	0	0	0	0	0	0	0	0	0	0	0	0	0	0	0	0	0	0	0
24585428	308.621		0	0	0	1	0.49	0	1	1																									0
24585428	1135.34	1134	0	1		1	0.3617	1	1	1	0	1	1	1	0	0	0	0	0	0	0	0	0	0	0	0	0	0	0	0	1	1	0	0	0
24585428	612.63	612	0	0	0	0	0.49	1	1	1		1	1	1	0	0	0	0	0	0	0	1	1	0	0	0	0	0	0	1	0	0	0	0	0
24585428	987.329	987	0	1		0	0.55319	1	1	1	0	1	1	1	0	0	0	0	0	0	0	1	1	0	0	0	0	0	0	1	1	1	0	0	0
24585428	217.389	219	0	1		1	0.55319	1	1	1	1	1	1	1	0	0	0	0	0	0	0	1	1	0	0	0	0	0	0	1					0
36618434	172.66	172	0	0	0	1	0.44	0	0	0		1	1	0	0	1	0	0	0	0	0	0	0	0	0	0	0	0	0	0	0	0	0	0	0
36618434		723	0	1		1	0.44	0	0	0	0	1	1	1	0	0	0	0	0	0	0	1	1	0	0	0	0	0	0	1
36618434	955.433	1089	0		1	1	0.2766	0	0	0	0	1	0	0	0	0	0	0	0	0	0	1	1	0	0	0	0	0	0	0					0
36618434	1245.67		0	0	0		0.44	0	0	0																									0
36618434	2028.44		0		1		0.2766	0	0	0	0	1	1	1	0	0	0	0	0	0	0	1	1	0	0	0	0	0	0	1					0
36618434	913.938		0	0	0	1	0.57	0	1	0																									0
36618434	1696.45	1830	0		1	1	0.48936	1	1	0	0	1	1	1	0	0	0	0	0	0	0	1	0	1	0	0	0	0	0	1					0
36618434	365.672	365	0	0	0	1	0.44	1	1	0		0	0	0	0	0	0	0	0	0	0	0	0	0	0	0	0	0	0	0	0	0	0	0	0
36618434	735.532	733	0	1		1	0.38298	1	1	0	0	0	0	0	0	0	0	0	0	0	0	0	0	0	0	0	0	0	0	0	0	0	0	0	0
85372842	778.481	783	0	0	0	1	0.4	0	0	1		1	1	1	0	0	0	0	1	0	0	1	1	0	0	0	0	0	0	1	1	1	1	1	0
85372842	1151.41	1329	0	1		1	0.19149	1	0	1	0	1	1	1	1	1	0	0	0	0	0	1	1	0	0	0	0	0	0	1					0
85372842	1567.35	1546	0		1	1	0.30851	0	0	1	0	1	1	1	0	0	0	0	0	0	0	1	1	0	0	0	0	0	0	1	1	1	1	1	0
85372842	1270.5	1270	0	0	0	1	0.4	0	0	1		1	1	1	0	0	0	0	0	0	0	0	0	0	0	0	0	0	0	0	1	1	1	1	0
85372842	1643.42		0	1		1	0.19149	1	0	1	0																								0
85372842	2059.36		0		1	1	0.30851	0	0	1	0																								0
85372842	284.419		0	1		0	0.19149	1	0	1	1																								0
85372842	700.361	679	0		1	0	0.30851	1	0	1	1	1	1	1	0	0	0	0	0	0	0	1	1	0	0	0	0	0	0	1	1	1	1	1	0
27854433	765.385	764	0	0	0		0.43	0	0	1		1	1	1	1	0	0	0	0	0	0	1	1	0	0	0	0	0	0	1	1	1	0	0	0
27854433	321.49	321	0	1		1	0.38298	0	0	1	0	0	0	0	0	0	0	0	0	0	0	0	0	0	0	0	0	0	0	0	0	0	0	0	0
27854433	927.282	884	0		1	1	0.35106	0	0	1	0	1	1	1	0	0	0	0	0	0	0	1	1	0	0	0	0	0	0	1					0
27854433	1350.5	1350	0	1		0	0.38298	0	0	1	0	1	1	1	0	0	0	1	0	0	0	1	1	0	0	0	0	0	0	1	1	1	0	0	0
27854433	1956.29	1750	0		1	0	0.35106	0	0	1	0	1	1	1	0	0	0	1	0	0	0	1	1	0	0	0	0	0	0	1	1	1	0	0	0
61136866	325.506		0	1		0	0.39362	1			1																								0
61136866	748.32	748	0		1	0	0.37234	0			1	1	1	0	0	1	0	0	0	0	0	1	1	0	0	0	0	0	0	1					0
61136866	1112.6		0	0	0	1	0.63	1	1	0																									0
61136866	1482.54	1482	0	1		1	0.23404	1	1	0	0	1	1	1	0	0	0	0	0	0	0	1	1	0	0	1	1	0	0	1	1	1	0	0	0
61136866	1912.52	1905	0		1	1	0.26596	0	1	0	0	1	1	1	1	1	0	0	0	0	0	1	1	0	0	0	0	0	0	1					0
64713365	425.524	426	0	0	0	1	0.48	1	1	0		1	1	0	1	0	0	0	0	0	0	0	0	0	0	0	0	0	0	0	0	0	0	0	1
64713365	795.587	865	0	1		1	0.44681	0	1	0	0	1	1	0	1	0	0	0	0	0	0	0	0	0	0	0	0	0	0	0	0	0	0	0	0
64713365		1205	0		1	1	0.44681	0	1	0	0	1	1	1	0	0	0	0	0	0	0	1	1	0	0	0	0	0	0	1
64713365	390.543	391	0	0	0	0	0.42	1	1	0		1	1	0	1	0	0	0	0	0	0	0	0	0	0	1	1	0	0	1	0	0	0	0	0
64713365			0		1						0	1	1	1	0	0	0	0	0	0	0	1	1	0	0	0	0	0	0	1
11182221	885.451	885	0	0	0	1	0.46	0	1	1		1	1	1	1	0	0	0	0	0	0	0	0	0	0	0	0	0	0	1	1	1	0	0	0
11182221	679.371		0	0	0	0	0.39	1	1	1																									0
11182221	1046.37	1045	0	1		0	0.40426	0	1	1	0	1	1	1	0	0	0	0	0	0	0	0	0	0	0	0	0	0	0	0	1	1	1	1	0
11182221	1462.39	1641	0		1	0	0.40426	1	1	1	0	1	1	1	1	0	0	0	0	0	0	1	1	0	0	1	1	0	0	1					1
61751277	127.475	127	0	0	0	0	0.49	1	1	0		1	1	1	0	0	0	0	0	0	0	0	0	0	0	0	0	0	0	0					0
61751277	494.423		0	1		0	0.57447	1	1	0	0																								0
61751277	1153.34	957	0		1	0	0.55319	0	1	0	0	1	1	1	1	0	0	0	0	0	0	1	1	0	0	0	0	0	0	1					0
61751277			0		1						0	1	1	0	1	0	0	0	0	0	0	0	0	0	0	0	0	0	0	0
28168827	418.903	417	0	0	0	0	0.57	0	1	1		1	1	1	1	0	0	0	0	0	0	0	0	0	0	0	0	0	0	1	0	0	0	0	0
28168827	789.504	790	0	1		0	0.39362	0	1	1	0	1	1	1	1	0	0	0	0	0	0	1	1	0	0	0	0	0	0	1	1	1	0	0	0
28168827	1225.52	1230	0		1	0	0.55319	0	1	1	0	0	0	0	0	0	0	0	0	0	0	0	0	0	0	0	0	0	0	0	0	0	0	0	0
28168827	94.5357	94	0		1	0	0.55319	0	1	1	0	1	1	1	0	0	0	0	0	0	0	1	1	0	0	0	0	0	0	1	1	1	0	0	0
28168827	352.53	352	0		1	0	0.55319	1	1	1	0	0	0	0	0	0	0	0	0	0	0	0	0	0	0	0	0	0	0	0	0	0	0	0	0
28168827	149.907	148	0	0	0	1	0.43	1	1	1		1	1	0	0	0	1	0	0	0	0	0	0	0	0	1	1	0	0	1	0	0	0	0	0
28168827		957	0		1	1	0.39362	1	1	1	0	1	1	1	0	0	0	0	0	0	0	1	1	0	0	0	0	0	0	1	1	1	0	0
28168827	356.91	355	0	0	0	1	0.43	1	1	1		0	0	0	0	0	0	0	0	0	0	0	0	0	0	0	0	0	0	0	0	0	0	0	0
28168827	978.01	727	0	1		1	0.39362	1	1	1	0	1	1	1	0	0	0	0	0	0	0	1	1	0	0	0	0	0	0	1	1	0	1	0	0
28168827	1166.38	1336	0		1	1	0.39362	0	1	1	0	1	1	1	1	0	0	0	0	0	0	1	1	0	0	0	0	0	0	1					0
28168827	278.39		0		1	1		0			1	0	0	0	0	0	0	0	0	0	0	0	0	0	0	0	0	0	0	0	0	0	0	0	1
28168827	1006.36	1006	0	1		1	0.60638	0			0	1	1	1	0	0	0	0	0	0	0	0	0	0	0	0	0	0	0	0	0	0	0	0	0
28168827	1444.36	1446	0		1	1	0.60638	1			0	1	1	1	1	0	0	0	0	0	0	1	1	0	0	0	0	0	0	1	0	0	0	0	1
23687845	614.581	614	0	0	0	1	0.7	1	1	1		0	0	0	0	0	0	0	0	0	0	0	0	0	0	1	1	0	0	0	1	1	0	0	0
[truncated: 928 more rows]
